# Supplementary material
Source: PubMed Central journal article supplement (PMC3808468)
Supplement: NIHMS506600-supplement-02.pdf [file NIHMS506600-supplement-02.pdf]

| SNP        | GENE     | CHR | BP        | TMD |     |      |      |         | TMD with widespread pain |     |      |      |         | Localized TMD |     |      |      |         |
|------------|----------|-----|-----------|-----|-----|------|------|---------|--------------------------|-----|------|------|---------|---------------|-----|------|------|---------|
|            |          |     |           | A1  | N   | OR   | SE   | P       | A1                       | N   | OR   | SE   | P       | A1            | N   | OR   | SE   | P       |
| rs10007366 | GRIA2    | 4   | 158476758 | A   | 394 | 0.85 | 0.28 | 5.8E-01 | A                        | 292 | 0.96 | 0.34 | 9.0E-01 | A             | 281 | 0.78 | 0.37 | 5.0E-01 |
| rs1001484  | AIM      | 12  | 110021205 | G   | 394 | 1.05 | 0.17 | 8.0E-01 | G                        | 292 | 1.04 | 0.20 | 8.4E-01 | G             | 281 | 1.01 | 0.21 | 9.5E-01 |
| rs10016465 | CCKAR    | 4   | 26090438  | G   | 394 | 1.19 | 0.16 | 2.9E-01 | G                        | 292 | 1.06 | 0.20 | 7.7E-01 | G             | 281 | 1.40 | 0.21 | 1.1E-01 |
| rs1002317  | ACCN1    | 17  | 28624412  | G   | 393 | 0.98 | 0.17 | 9.0E-01 | G                        | 291 | 0.89 | 0.21 | 5.8E-01 | G             | 280 | 1.04 | 0.21 | 8.6E-01 |
| rs10027540 | ACSL1    | 4   | 185987834 | G   | 393 | 0.86 | 0.17 | 3.8E-01 | G                        | 291 | 0.78 | 0.21 | 2.5E-01 | G             | 280 | 1.02 | 0.21 | 9.2E-01 |
| rs10028945 | GABRB1   | 4   | 47123062  | A   | 394 | 0.84 | 0.16 | 2.9E-01 | A                        | 292 | 1.02 | 0.19 | 9.2E-01 | A             | 281 | 0.67 | 0.22 | 6.8E-02 |
| rs1003229  | AIM      | 14  | 97241370  | G   | 394 | 0.92 | 0.17 | 6.2E-01 | G                        | 292 | 0.97 | 0.20 | 9.0E-01 | G             | 281 | 0.91 | 0.22 | 6.6E-01 |
| rs10033951 | DRD5     | 4   | 9388678   | T   | 394 | 0.84 | 0.15 | 2.5E-01 | T                        | 292 | 0.77 | 0.19 | 1.6E-01 | T             | 281 | 0.91 | 0.19 | 6.2E-01 |
| rs10042081 | GRIA1    | 5   | 153043509 | C   | 381 | 1.23 | 0.18 | 2.4E-01 | C                        | 284 | 1.29 | 0.21 | 2.3E-01 | C             | 270 | 1.15 | 0.22 | 5.3E-01 |
| rs10051667 | GABRB2   | 5   | 160830906 | C   | 394 | 0.88 | 0.26 | 6.1E-01 | C                        | 292 | 0.87 | 0.31 | 6.6E-01 | C             | 281 | 0.85 | 0.33 | 6.2E-01 |
| rs1005358  | KCNJ6    | 21  | 38095990  | G   | 394 | 1.01 | 0.14 | 9.4E-01 | G                        | 292 | 1.01 | 0.17 | 9.6E-01 | G             | 281 | 1.02 | 0.18 | 9.1E-01 |
| rs10057083 | CSNK1A1  | 5   | 148854047 | G   | 394 | 1.03 | 0.26 | 9.0E-01 | G                        | 292 | 0.77 | 0.34 | 4.5E-01 | G             | 281 | 1.40 | 0.31 | 2.8E-01 |
| rs10058728 | CSNK1A1  | 5   | 148884285 | T   | 394 | 1.21 | 0.15 | 1.9E-01 | T                        | 292 | 1.06 | 0.17 | 7.3E-01 | T             | 281 | 1.33 | 0.19 | 1.3E-01 |
| rs10069900 | GABRB2   | 5   | 160850531 | G   | 394 | 1.13 | 0.16 | 4.3E-01 | G                        | 292 | 0.97 | 0.19 | 8.7E-01 | G             | 281 | 1.31 | 0.20 | 1.8E-01 |
| rs10070447 | GRIA1    | 5   | 153159007 | T   | 394 | 1.03 | 0.14 | 8.3E-01 | T                        | 292 | 1.08 | 0.18 | 6.6E-01 | T             | 281 | 1.01 | 0.18 | 9.8E-01 |
| rs1007722  | SCN2A    | 2   | 165956293 | A   | 394 | 0.89 | 0.15 | 4.4E-01 | A                        | 292 | 1.03 | 0.19 | 8.6E-01 | A             | 281 | 0.78 | 0.20 | 2.1E-01 |
| rs10086435 | STAU2    | 8   | 74766335  | T   | 394 | 0.98 | 0.18 | 9.3E-01 | T                        | 292 | 1.02 | 0.22 | 9.3E-01 | T             | 281 | 0.91 | 0.24 | 6.9E-01 |
| rs1008673  | ADRBK2   | 22  | 24324013  | G   | 389 | 1.16 | 0.17 | 4.1E-01 | G                        | 287 | 1.22 | 0.20 | 3.3E-01 | G             | 277 | 1.00 | 0.22 | 1.0E+00 |
| rs10086736 | STAU2    | 8   | 74824332  | C   | 394 | 1.04 | 0.16 | 8.1E-01 | C                        | 292 | 1.02 | 0.20 | 9.3E-01 | C             | 281 | 1.05 | 0.20 | 8.2E-01 |
| rs10089254 | ADRA1A   | 8   | 26680523  | G   | 391 | 0.90 | 0.15 | 5.0E-01 | G                        | 289 | 0.87 | 0.18 | 4.3E-01 | G             | 279 | 0.93 | 0.19 | 7.0E-01 |
| rs1008949  | EGR3     | 8   | 22609566  | T   | 389 | 0.86 | 0.15 | 3.0E-01 | T                        | 288 | 0.94 | 0.18 | 7.4E-01 | T             | 276 | 0.78 | 0.18 | 1.7E-01 |
| rs1009848  | EPHB6    | 7   | 142265373 | G   | 394 | 0.84 | 0.16 | 2.6E-01 | G                        | 292 | 0.84 | 0.21 | 4.1E-01 | G             | 281 | 0.88 | 0.20 | 5.1E-01 |
| rs10100388 | STAU2    | 8   | 74780483  | G   | 393 | 1.07 | 0.16 | 6.5E-01 | G                        | 291 | 1.15 | 0.19 | 4.6E-01 | G             | 281 | 0.95 | 0.20 | 8.1E-01 |
| rs10106686 | STAU2    | 8   | 74794424  | T   | 394 | 1.31 | 0.30 | 3.7E-01 | T                        | 292 | 1.30 | 0.35 | 4.5E-01 | T             | 281 | 1.17 | 0.37 | 6.8E-01 |
| rs10107384 | AIM      | 8   | 10890860  | G   | 393 | 0.85 | 0.15 | 2.7E-01 | G                        | 291 | 0.97 | 0.18 | 8.7E-01 | G             | 280 | 0.69 | 0.20 | 6.3E-02 |
| rs10108011 | PPP3CC   | 8   | 22376751  | G   | 394 | 1.13 | 0.14 | 4.0E-01 | G                        | 292 | 1.00 | 0.17 | 9.8E-01 | G             | 281 | 1.26 | 0.18 | 2.0E-01 |
| rs10113320 | AIM      | 8   | 134925795 | T   | 394 | 1.06 | 0.15 | 7.1E-01 | T                        | 292 | 0.96 | 0.18 | 8.1E-01 | T             | 281 | 1.21 | 0.18 | 3.1E-01 |
| rs1011696  | CACNA2D1 | 7   | 81546254  | T   | 393 | 1.02 | 0.15 | 9.2E-01 | T                        | 291 | 1.23 | 0.18 | 2.6E-01 | T             | 280 | 0.94 | 0.20 | 7.7E-01 |
| rs10117    | HSPA9    | 5   | 137920069 | A   | 394 | 1.10 | 0.14 | 5.2E-01 | A                        | 292 | 1.14 | 0.18 | 4.6E-01 | A             | 281 | 1.10 | 0.18 | 6.0E-01 |
| rs1012586  | GRIN2B   | 12  | 13746899  | C   | 394 | 1.03 | 0.15 | 8.2E-01 | C                        | 292 | 1.08 | 0.19 | 6.8E-01 | C             | 281 | 0.96 | 0.18 | 8.2E-01 |
| rs1012587  | GRIN2B   | 12  | 13746181  | A   | 394 | 1.07 | 0.16 | 6.8E-01 | A                        | 292 | 0.91 | 0.21 | 6.4E-01 | A             | 281 | 1.30 | 0.21 | 2.1E-01 |
| rs10128498 | GRK5     | 10  | 121042898 | G   | 394 | 1.16 | 0.14 | 2.9E-01 | G                        | 292 | 1.40 | 0.17 | 4.9E-02 | G             | 281 | 1.02 | 0.18 | 9.3E-01 |
| rs10129270 | HIF1A    | 14  | 61251707  | A   | 394 | 1.09 | 0.30 | 7.7E-01 | A                        | 292 | 1.21 | 0.36 | 5.9E-01 | A             | 281 | 1.06 | 0.38 | 8.7E-01 |
| rs10137185 | ESR2     | 14  | 63845529  | T   | 394 | 0.72 | 0.25 | 1.8E-01 | T                        | 292 | 0.52 | 0.33 | 4.6E-02 | T             | 281 | 0.93 | 0.29 | 8.1E-01 |
| rs10143977 | BDKRB1   | 14  | 95796636  | G   | 394 | 0.68 | 0.26 | 1.3E-01 | G                        | 292 | 0.69 | 0.32 | 2.4E-01 | G             | 281 | 0.78 | 0.32 | 4.3E-01 |
| rs1014444  | DPP4     | 2   | 162577104 | G   | 393 | 1.05 | 0.15 | 7.3E-01 | G                        | 291 | 1.14 | 0.18 | 4.5E-01 | G             | 281 | 0.96 | 0.19 | 8.2E-01 |
| rs1014531  | GRIN2A   | 16  | 9763295   | A   | 394 | 1.16 | 0.14 | 3.2E-01 | A                        | 292 | 1.17 | 0.17 | 3.6E-01 | A             | 281 | 1.17 | 0.18 | 3.8E-01 |
| rs10152453 | AIM      | 15  | 61885666  | C   | 394 | 0.67 | 0.21 | 6.0E-02 | C                        | 292 | 0.62 | 0.27 | 7.2E-02 | C             | 281 | 0.74 | 0.26 | 2.6E-01 |
| rs10152524 | AIM      | 15  | 44027656  | C   | 394 | 0.93 | 0.17 | 6.7E-01 | C                        | 292 | 0.84 | 0.22 | 4.1E-01 | C             | 281 | 1.00 | 0.22 | 9.9E-01 |

| SNP        | GENE     | CHR | BP        | TMD |     |      |      |         | TMD with widespread pain |     |      |      |         | Localized TMD |     |      |      |         |
|------------|----------|-----|-----------|-----|-----|------|------|---------|--------------------------|-----|------|------|---------|---------------|-----|------|------|---------|
|            |          |     |           | A1  | N   | OR   | SE   | P       | A1                       | N   | OR   | SE   | P       | A1            | N   | OR   | SE   | P       |
| rs10155882 | IFRD1    | 7   | 111874269 | C   | 394 | 0.78 | 0.14 | 7.6E-02 | C                        | 292 | 0.89 | 0.17 | 4.9E-01 | C             | 281 | 0.70 | 0.19 | 5.2E-02 |
| rs10157379 | NLRP3    | 1   | 245672222 | C   | 393 | 1.18 | 0.14 | 2.5E-01 | C                        | 292 | 1.43 | 0.18 | 4.3E-02 | C             | 281 | 0.95 | 0.17 | 7.9E-01 |
| rs1016379  | PRKACB   | 1   | 84362717  | G   | 394 | 1.21 | 0.17 | 2.5E-01 | G                        | 292 | 1.61 | 0.20 | 1.6E-02 | G             | 281 | 0.80 | 0.22 | 3.1E-01 |
| rs1016732  | ATP1A2   | 1   | 158353592 | A   | 394 | 1.25 | 0.19 | 2.5E-01 | A                        | 292 | 1.27 | 0.23 | 3.0E-01 | A             | 281 | 1.36 | 0.24 | 2.0E-01 |
| rs10173511 | ERBB4    | 2   | 212872835 | G   | 394 | 0.64 | 0.24 | 6.1E-02 | G                        | 292 | 0.59 | 0.30 | 7.9E-02 | G             | 281 | 0.66 | 0.30 | 1.7E-01 |
| rs10177176 | PRKD3    | 2   | 37371549  | C   | 394 | 1.17 | 0.15 | 2.9E-01 | C                        | 292 | 1.32 | 0.18 | 1.2E-01 | C             | 281 | 0.99 | 0.19 | 9.7E-01 |
| rs10179705 | CALCRL   | 2   | 188023479 | A   | 393 | 0.86 | 0.16 | 3.3E-01 | A                        | 291 | 0.76 | 0.19 | 1.7E-01 | A             | 281 | 1.00 | 0.19 | 9.9E-01 |
| rs10190201 | XDH      | 2   | 31438579  | G   | 394 | 1.20 | 0.14 | 2.0E-01 | G                        | 292 | 1.26 | 0.18 | 1.9E-01 | G             | 281 | 1.14 | 0.18 | 4.8E-01 |
| rs10192302 | ERBB4    | 2   | 212116424 | C   | 394 | 1.14 | 0.15 | 3.8E-01 | C                        | 292 | 1.03 | 0.18 | 8.7E-01 | C             | 281 | 1.27 | 0.19 | 2.0E-01 |
| rs10194776 | HTR2B    | 2   | 231688263 | T   | 394 | 1.04 | 0.15 | 7.7E-01 | T                        | 292 | 1.05 | 0.18 | 7.8E-01 | T             | 281 | 1.03 | 0.19 | 8.8E-01 |
| rs10203398 | CALCRL   | 2   | 188023822 | G   | 379 | 0.88 | 0.15 | 4.0E-01 | G                        | 283 | 0.78 | 0.19 | 2.0E-01 | G             | 272 | 1.01 | 0.19 | 9.4E-01 |
| rs10207672 | TRPM8    | 2   | 234552900 | C   | 394 | 0.97 | 0.15 | 8.2E-01 | C                        | 292 | 0.70 | 0.19 | 6.2E-02 | C             | 281 | 1.27 | 0.19 | 2.0E-01 |
| rs1020852  | SCN1A    | 2   | 166635905 | T   | 394 | 0.79 | 0.18 | 1.8E-01 | T                        | 292 | 0.93 | 0.22 | 7.5E-01 | T             | 281 | 0.73 | 0.24 | 1.9E-01 |
| rs10208860 | TACR1    | 2   | 75225096  | T   | 394 | 0.70 | 0.14 | 1.4E-02 | T                        | 292 | 0.67 | 0.17 | 1.8E-02 | T             | 281 | 0.75 | 0.18 | 1.1E-01 |
| rs10214211 | ADRA1B   | 5   | 159333089 | C   | 394 | 1.41 | 0.28 | 2.2E-01 | C                        | 292 | 1.64 | 0.33 | 1.4E-01 | C             | 281 | 1.29 | 0.35 | 4.6E-01 |
| rs10215655 | ETV1     | 7   | 13992291  | T   | 394 | 1.17 | 0.14 | 2.8E-01 | T                        | 292 | 1.43 | 0.18 | 4.6E-02 | T             | 281 | 1.00 | 0.18 | 9.9E-01 |
| rs10224124 | CAMK2B   | 7   | 44301067  | T   | 393 | 1.21 | 0.15 | 1.9E-01 | T                        | 291 | 1.20 | 0.18 | 3.1E-01 | T             | 280 | 1.30 | 0.18 | 1.4E-01 |
| rs10226282 | CACNA2D1 | 7   | 81415369  | A   | 394 | 0.85 | 0.17 | 3.2E-01 | A                        | 292 | 1.04 | 0.20 | 8.3E-01 | A             | 281 | 0.63 | 0.24 | 5.4E-02 |
| rs1023990  | TPH2     | 12  | 70668514  | G   | 394 | 1.06 | 0.16 | 7.0E-01 | G                        | 292 | 1.17 | 0.18 | 3.9E-01 | G             | 281 | 0.97 | 0.20 | 9.0E-01 |
| rs1024323  | GRK4     | 4   | 2975841   | T   | 394 | 1.07 | 0.15 | 6.6E-01 | T                        | 292 | 1.01 | 0.18 | 9.6E-01 | T             | 281 | 1.08 | 0.19 | 6.9E-01 |
| rs10244108 | EGFR     | 7   | 55119831  | A   | 394 | 0.82 | 0.15 | 1.8E-01 | A                        | 292 | 0.89 | 0.18 | 5.2E-01 | A             | 281 | 0.75 | 0.19 | 1.3E-01 |
| rs10244632 | DDC      | 7   | 50566197  | T   | 394 | 0.93 | 0.17 | 6.7E-01 | T                        | 292 | 0.97 | 0.21 | 9.0E-01 | T             | 281 | 0.84 | 0.22 | 4.2E-01 |
| rs1024570  | IFRD1    | 7   | 111895527 | C   | 393 | 1.27 | 0.15 | 1.1E-01 | C                        | 291 | 1.28 | 0.18 | 1.7E-01 | C             | 281 | 1.34 | 0.18 | 1.2E-01 |
| rs10249419 | AIM      | 7   | 117169042 | T   | 394 | 0.83 | 0.15 | 2.0E-01 | T                        | 292 | 0.88 | 0.18 | 4.6E-01 | T             | 281 | 0.76 | 0.20 | 1.7E-01 |
| rs10261685 | ABCB1    | 7   | 87182354  | C   | 394 | 0.87 | 0.53 | 7.9E-01 | C                        | 292 | 1.03 | 0.64 | 9.6E-01 | C             | 281 | 0.86 | 0.70 | 8.3E-01 |
| rs1027478  | CALM2    | 2   | 47243530  | C   | 394 | 0.96 | 0.15 | 7.7E-01 | C                        | 292 | 0.98 | 0.18 | 9.2E-01 | C             | 281 | 0.91 | 0.19 | 6.2E-01 |
| rs10277237 | NOS3     | 7   | 150314277 | A   | 393 | 1.07 | 0.17 | 7.0E-01 | A                        | 291 | 1.15 | 0.20 | 4.8E-01 | A             | 280 | 0.96 | 0.22 | 8.5E-01 |
| rs1028040  | AIM      | 3   | 57215650  | T   | 394 | 1.08 | 0.15 | 6.1E-01 | T                        | 292 | 0.82 | 0.19 | 2.8E-01 | T             | 281 | 1.32 | 0.18 | 1.2E-01 |
| rs10306114 | PTGS1    | 9   | 124172343 | G   | 393 | 1.57 | 0.29 | 1.2E-01 | G                        | 291 | 1.70 | 0.33 | 1.1E-01 | G             | 280 | 1.26 | 0.37 | 5.2E-01 |
| rs10306194 | PTGS1    | 9   | 124197019 | A   | 394 | 1.16 | 0.21 | 4.7E-01 | A                        | 292 | 1.22 | 0.24 | 4.2E-01 | A             | 281 | 1.11 | 0.26 | 6.8E-01 |
| rs10306202 | PTGS1    | 9   | 124199342 | A   | 394 | 1.15 | 0.26 | 6.0E-01 | A                        | 292 | 1.11 | 0.32 | 7.5E-01 | A             | 281 | 1.17 | 0.33 | 6.3E-01 |
| rs10370    | SOD2     | 6   | 160021522 | G   | 394 | 0.99 | 0.15 | 9.4E-01 | G                        | 292 | 0.94 | 0.19 | 7.3E-01 | G             | 281 | 1.05 | 0.19 | 8.0E-01 |
| rs10410581 | NALP12   | 19  | 58989046  | T   | 394 | 1.10 | 0.31 | 7.6E-01 | T                        | 292 | 1.30 | 0.35 | 4.5E-01 | T             | 281 | 0.77 | 0.42 | 5.3E-01 |
| rs10420077 | AIM      | 19  | 35338458  | G   | 392 | 1.08 | 0.16 | 6.3E-01 | G                        | 291 | 1.01 | 0.19 | 9.7E-01 | G             | 279 | 1.17 | 0.20 | 4.3E-01 |
| rs1042039  | XDH      | 2   | 31411810  | C   | 394 | 0.93 | 0.15 | 6.5E-01 | C                        | 292 | 0.97 | 0.18 | 8.6E-01 | C             | 281 | 0.92 | 0.19 | 6.5E-01 |
| rs1042048  | CCKBR    | 11  | 6249786   | G   | 394 | 0.85 | 0.15 | 2.7E-01 | G                        | 292 | 0.78 | 0.18 | 1.8E-01 | G             | 281 | 0.99 | 0.18 | 9.7E-01 |
| rs1042173  | SLC6A4   | 17  | 25549137  | C   | 394 | 0.81 | 0.14 | 1.3E-01 | C                        | 292 | 0.89 | 0.17 | 5.0E-01 | C             | 281 | 0.80 | 0.18 | 2.1E-01 |
| rs1042426  | ATP6V1B2 | 8   | 20122923  | C   | 394 | 1.39 | 0.26 | 2.0E-01 | C                        | 292 | 1.53 | 0.30 | 1.6E-01 | C             | 281 | 1.21 | 0.33 | 5.6E-01 |
| rs1042618  | PTGER2   | 14  | 51864850  | T   | 394 | 1.13 | 0.22 | 5.8E-01 | T                        | 292 | 1.10 | 0.27 | 7.1E-01 | T             | 281 | 1.31 | 0.27 | 3.3E-01 |

| SNP        | GENE     | CHR | BP        | TMD |     |      |      |         | TMD with widespread pain |     |      |      |         | Localized TMD |     |      |      |         |
|------------|----------|-----|-----------|-----|-----|------|------|---------|--------------------------|-----|------|------|---------|---------------|-----|------|------|---------|
|            |          |     |           | A1  | N   | OR   | SE   | P       | A1                       | N   | OR   | SE   | P       | A1            | N   | OR   | SE   | P       |
| rs1042711  | ADRB2    | 5   | 148186541 | C   | 380 | 1.17 | 0.14 | 2.6E-01 | C                        | 281 | 1.13 | 0.17 | 4.8E-01 | C             | 270 | 1.29 | 0.17 | 1.4E-01 |
| rs1042714  | ADRB2    | 5   | 148186666 | G   | 394 | 1.16 | 0.14 | 3.0E-01 | G                        | 292 | 1.12 | 0.17 | 5.0E-01 | G             | 281 | 1.27 | 0.17 | 1.6E-01 |
| rs1042717  | ADRB2    | 5   | 148186839 | A   | 394 | 0.91 | 0.18 | 5.9E-01 | A                        | 292 | 0.74 | 0.23 | 1.8E-01 | A             | 281 | 1.10 | 0.22 | 6.7E-01 |
| rs1042718  | ADRB2    | 5   | 148187110 | A   | 394 | 0.87 | 0.19 | 4.5E-01 | A                        | 292 | 0.68 | 0.24 | 1.1E-01 | A             | 281 | 1.11 | 0.23 | 6.6E-01 |
| rs1042719  | ADRB2    | 5   | 148187640 | C   | 389 | 0.88 | 0.16 | 4.2E-01 | C                        | 289 | 0.73 | 0.19 | 1.0E-01 | C             | 277 | 1.04 | 0.19 | 8.2E-01 |
| rs1042728  | PTGER1   | 19  | 14442063  | G   | 377 | 0.95 | 0.27 | 8.6E-01 | G                        | 277 | 0.69 | 0.37 | 3.2E-01 | G             | 268 | 1.14 | 0.32 | 6.9E-01 |
| rs10430472 | PRKG1    | 10  | 53562554  | T   | 392 | 1.26 | 0.39 | 5.5E-01 | T                        | 290 | 0.93 | 0.49 | 8.7E-01 | T             | 281 | 1.51 | 0.44 | 3.5E-01 |
| rs1043132  | ATP6V1A  | 3   | 115011379 | G   | 394 | 1.18 | 0.15 | 2.8E-01 | G                        | 292 | 1.30 | 0.19 | 1.6E-01 | G             | 281 | 1.14 | 0.19 | 5.0E-01 |
| rs1043357  | STAU1    | 20  | 47164635  | C   | 394 | 1.03 | 0.15 | 8.2E-01 | C                        | 292 | 1.19 | 0.18 | 3.4E-01 | C             | 281 | 0.92 | 0.19 | 6.8E-01 |
| rs1043627  | PLA2G4B  | 15  | 39907192  | T   | 394 | 0.73 | 0.21 | 1.4E-01 | T                        | 292 | 0.78 | 0.25 | 3.2E-01 | T             | 281 | 0.66 | 0.29 | 1.4E-01 |
| rs1044393  | CHRNA4   | 20  | 61452568  | A   | 376 | 1.14 | 0.23 | 5.6E-01 | A                        | 278 | 1.06 | 0.27 | 8.4E-01 | A             | 266 | 1.17 | 0.28 | 5.8E-01 |
| rs10460527 | PRKD3    | 2   | 37358609  | G   | 393 | 0.79 | 0.22 | 2.9E-01 | G                        | 291 | 0.80 | 0.27 | 4.1E-01 | G             | 281 | 0.76 | 0.28 | 3.4E-01 |
| rs10460960 | CCK      | 3   | 42283739  | G   | 393 | 1.06 | 0.22 | 8.1E-01 | G                        | 291 | 1.13 | 0.26 | 6.4E-01 | G             | 281 | 1.01 | 0.27 | 9.6E-01 |
| rs1046117  | FOS      | 14  | 74816443  | C   | 391 | 1.14 | 0.16 | 4.4E-01 | C                        | 290 | 1.20 | 0.20 | 3.7E-01 | C             | 278 | 0.99 | 0.20 | 9.5E-01 |
| rs1046248  | BDKRB2   | 14  | 95773237  | T   | 394 | 0.85 | 0.24 | 4.8E-01 | T                        | 292 | 0.77 | 0.30 | 3.8E-01 | T             | 281 | 0.98 | 0.30 | 9.6E-01 |
| rs10463249 | GRIA1    | 5   | 152897553 | T   | 394 | 1.12 | 0.15 | 4.3E-01 | T                        | 292 | 1.14 | 0.18 | 4.7E-01 | T             | 281 | 1.13 | 0.18 | 5.1E-01 |
| rs10463293 | CAMK2A   | 5   | 149616266 | G   | 393 | 1.24 | 0.14 | 1.3E-01 | G                        | 291 | 1.14 | 0.17 | 4.5E-01 | G             | 281 | 1.34 | 0.18 | 1.0E-01 |
| rs10468138 | NTRK3    | 15  | 86362191  | G   | 394 | 0.97 | 0.14 | 8.4E-01 | G                        | 292 | 0.93 | 0.17 | 6.7E-01 | G             | 281 | 1.01 | 0.17 | 9.6E-01 |
| rs1046995  | ATP1A2   | 1   | 158379365 | C   | 394 | 0.71 | 0.18 | 6.1E-02 | C                        | 292 | 0.64 | 0.23 | 5.5E-02 | C             | 281 | 0.84 | 0.23 | 4.4E-01 |
| rs1047214  | NPY2R    | 4   | 156355126 | C   | 394 | 1.21 | 0.15 | 1.9E-01 | C                        | 292 | 1.16 | 0.17 | 3.8E-01 | C             | 281 | 1.20 | 0.18 | 3.2E-01 |
| rs1047735  | NOS1     | 12  | 116169653 | A   | 394 | 1.13 | 0.16 | 4.3E-01 | A                        | 292 | 1.55 | 0.18 | 1.7E-02 | A             | 281 | 0.69 | 0.22 | 8.8E-02 |
| rs10482672 | NR3C1    | 5   | 142672726 | A   | 393 | 0.96 | 0.21 | 8.5E-01 | A                        | 291 | 0.77 | 0.27 | 3.4E-01 | A             | 281 | 1.11 | 0.26 | 6.9E-01 |
| rs10483038 | KCNJ6    | 21  | 37946641  | C   | 394 | 0.96 | 0.15 | 7.7E-01 | C                        | 292 | 0.89 | 0.19 | 5.3E-01 | C             | 281 | 1.10 | 0.18 | 6.1E-01 |
| rs10483639 | GCH1     | 14  | 54376207  | C   | 394 | 0.93 | 0.17 | 6.7E-01 | C                        | 292 | 0.93 | 0.21 | 7.2E-01 | C             | 281 | 0.92 | 0.21 | 6.7E-01 |
| rs1048401  | GBP1     | 1   | 89298554  | C   | 394 | 1.10 | 0.43 | 8.3E-01 | C                        | 292 | 1.33 | 0.46 | 5.4E-01 | C             | 281 | 0.70 | 0.64 | 5.8E-01 |
| rs10485422 | RUNX2    | 6   | 45597170  | A   | 394 | 1.31 | 0.16 | 8.9E-02 | A                        | 292 | 1.32 | 0.19 | 1.4E-01 | A             | 281 | 1.33 | 0.20 | 1.5E-01 |
| rs10485703 | PDYN     | 20  | 1908313   | G   | 394 | 0.93 | 0.22 | 7.4E-01 | G                        | 292 | 0.82 | 0.29 | 5.0E-01 | G             | 281 | 1.09 | 0.27 | 7.5E-01 |
| rs10486945 | CACNA2D1 | 7   | 81611085  | A   | 394 | 1.18 | 0.15 | 2.9E-01 | A                        | 292 | 1.09 | 0.19 | 6.5E-01 | A             | 281 | 1.23 | 0.19 | 2.7E-01 |
| rs10486948 | CACNA2D1 | 7   | 81629627  | T   | 393 | 0.97 | 0.15 | 8.6E-01 | T                        | 292 | 1.14 | 0.18 | 4.7E-01 | T             | 280 | 0.80 | 0.20 | 2.4E-01 |
| rs10486960 | CACNA2D1 | 7   | 81926324  | T   | 394 | 1.24 | 0.20 | 2.8E-01 | T                        | 292 | 1.26 | 0.24 | 3.3E-01 | T             | 281 | 1.30 | 0.25 | 2.9E-01 |
| rs10488141 | EGFR     | 7   | 55162838  | T   | 394 | 1.06 | 0.17 | 7.3E-01 | T                        | 292 | 1.15 | 0.21 | 5.2E-01 | T             | 281 | 1.14 | 0.22 | 5.5E-01 |
| rs10488401 | AIM      | 7   | 135476064 | A   | 394 | 1.08 | 0.14 | 5.8E-01 | A                        | 292 | 1.07 | 0.17 | 7.0E-01 | A             | 281 | 1.12 | 0.17 | 5.0E-01 |
| rs10488619 | AIM      | 7   | 135824107 | A   | 393 | 0.82 | 0.14 | 1.5E-01 | A                        | 291 | 0.78 | 0.17 | 1.6E-01 | A             | 280 | 0.83 | 0.17 | 3.0E-01 |
| rs1048892  | ATP6V1A  | 3   | 114947549 | G   | 394 | 1.17 | 0.15 | 3.2E-01 | G                        | 292 | 1.30 | 0.19 | 1.6E-01 | G             | 281 | 1.14 | 0.19 | 5.1E-01 |
| rs10489406 | PLA2G4A  | 1   | 185079750 | A   | 394 | 1.74 | 0.24 | 2.2E-02 | A                        | 292 | 1.76 | 0.29 | 4.9E-02 | A             | 281 | 1.69 | 0.29 | 6.9E-02 |
| rs10489407 | PLA2G4A  | 1   | 185090736 | A   | 394 | 0.71 | 0.20 | 8.3E-02 | A                        | 292 | 0.69 | 0.25 | 1.4E-01 | A             | 281 | 0.76 | 0.25 | 2.8E-01 |
| rs10489968 | INADL    | 1   | 62202253  | G   | 394 | 1.10 | 0.19 | 6.3E-01 | G                        | 292 | 1.29 | 0.23 | 2.6E-01 | G             | 281 | 0.85 | 0.26 | 5.4E-01 |
| rs10490977 | PRKG1    | 10  | 52683543  | T   | 394 | 1.36 | 0.45 | 5.0E-01 | T                        | 292 | 3.06 | 0.50 | 2.5E-02 | T             | 281 | 0.28 | 1.08 | 2.4E-01 |
| rs10491329 | GABRG2   | 5   | 161504278 | G   | 394 | 1.21 | 0.20 | 3.6E-01 | G                        | 292 | 1.09 | 0.24 | 7.3E-01 | G             | 281 | 1.33 | 0.26 | 2.7E-01 |

| SNP        | GENE    | CHR | BP        | TMD |     |      |      |         | TMD with widespread pain |     |      |      |         | Localized TMD |     |      |      |         |
|------------|---------|-----|-----------|-----|-----|------|------|---------|--------------------------|-----|------|------|---------|---------------|-----|------|------|---------|
|            |         |     |           | A1  | N   | OR   | SE   | P       | A1                       | N   | OR   | SE   | P       | A1            | N   | OR   | SE   | P       |
| rs10491334 | CAMK4   | 5   | 110800303 | T   | 394 | 0.60 | 0.20 | 1.0E-02 | T                        | 292 | 0.53 | 0.25 | 1.1E-02 | T             | 281 | 0.68 | 0.25 | 1.2E-01 |
| rs10491374 | SLC1A3  | 5   | 36703336  | G   | 392 | 0.91 | 0.15 | 5.1E-01 | G                        | 291 | 0.76 | 0.18 | 1.3E-01 | G             | 279 | 1.10 | 0.19 | 6.3E-01 |
| rs1049353  | CNR1    | 6   | 88910354  | T   | 393 | 1.19 | 0.16 | 2.8E-01 | T                        | 292 | 1.18 | 0.20 | 4.1E-01 | T             | 280 | 1.26 | 0.20 | 2.5E-01 |
| rs10493750 | PRKACB  | 1   | 84334853  | G   | 394 | 1.12 | 0.15 | 4.3E-01 | G                        | 292 | 0.99 | 0.18 | 9.8E-01 | G             | 281 | 1.27 | 0.18 | 1.9E-01 |
| rs10494336 | ATP1A2  | 1   | 158374212 | A   | 394 | 0.76 | 0.21 | 1.9E-01 | A                        | 292 | 0.69 | 0.26 | 1.6E-01 | A             | 281 | 0.93 | 0.26 | 7.7E-01 |
| rs10495927 | PRKCE   | 2   | 46206003  | G   | 394 | 0.85 | 0.15 | 2.9E-01 | G                        | 292 | 0.82 | 0.19 | 2.9E-01 | G             | 281 | 0.90 | 0.19 | 5.9E-01 |
| rs10497144 | KCNJ3   | 2   | 155336513 | C   | 394 | 1.00 | 0.30 | 1.0E+00 | C                        | 292 | 0.49 | 0.44 | 1.0E-01 | C             | 281 | 1.53 | 0.33 | 2.0E-01 |
| rs1049728  | RELA    | 11  | 65177693  | C   | 394 | 1.05 | 0.31 | 8.8E-01 | C                        | 292 | 0.90 | 0.38 | 7.8E-01 | C             | 281 | 1.12 | 0.38 | 7.7E-01 |
| rs10497944 | ERBB4   | 2   | 212002670 | G   | 394 | 0.93 | 0.14 | 6.2E-01 | G                        | 292 | 0.79 | 0.18 | 1.7E-01 | G             | 281 | 1.03 | 0.18 | 8.7E-01 |
| rs10498310 | PRKD1   | 14  | 29263897  | T   | 394 | 1.03 | 0.18 | 8.6E-01 | T                        | 292 | 1.17 | 0.21 | 4.6E-01 | T             | 281 | 0.90 | 0.23 | 6.4E-01 |
| rs10498313 | PRKD1   | 14  | 29468627  | G   | 385 | 1.18 | 0.18 | 3.6E-01 | G                        | 283 | 1.35 | 0.22 | 1.7E-01 | G             | 274 | 1.04 | 0.23 | 8.7E-01 |
| rs1049982  | CAT     | 11  | 34417117  | T   | 394 | 1.19 | 0.16 | 2.7E-01 | T                        | 292 | 1.15 | 0.19 | 4.5E-01 | T             | 281 | 1.18 | 0.20 | 4.1E-01 |
| rs10500205 | CAMK4   | 5   | 110659890 | C   | 394 | 1.21 | 0.61 | 7.6E-01 | C                        | 292 | 2.32 | 0.68 | 2.2E-01 | C             | 281 | 0.50 | 1.13 | 5.4E-01 |
| rs1050305  | ANXA1   | 9   | 74965055  | G   | 394 | 1.86 | 0.29 | 3.0E-02 | G                        | 292 | 1.91 | 0.34 | 5.8E-02 | G             | 281 | 2.28 | 0.35 | 1.9E-02 |
| rs10503929 | NRG1    | 8   | 32733525  | C   | 394 | 1.24 | 0.18 | 2.4E-01 | C                        | 292 | 0.99 | 0.23 | 9.6E-01 | C             | 281 | 1.48 | 0.22 | 6.9E-02 |
| rs1050395  | ATP2B1  | 12  | 88553032  | C   | 394 | 1.05 | 0.18 | 7.9E-01 | C                        | 292 | 0.93 | 0.22 | 7.4E-01 | C             | 281 | 1.23 | 0.23 | 3.6E-01 |
| rs10505778 | GRIN2B  | 12  | 14016831  | G   | 394 | 1.02 | 0.15 | 8.8E-01 | G                        | 292 | 1.05 | 0.18 | 8.0E-01 | G             | 281 | 0.94 | 0.19 | 7.7E-01 |
| rs10506974 | ATP2B1  | 12  | 88510467  | T   | 394 | 1.15 | 0.19 | 4.6E-01 | T                        | 292 | 1.09 | 0.22 | 7.2E-01 | T             | 281 | 1.35 | 0.23 | 1.9E-01 |
| rs10510496 | RAB5A   | 3   | 19967592  | A   | 393 | 1.18 | 0.18 | 3.5E-01 | A                        | 292 | 1.21 | 0.22 | 3.8E-01 | A             | 280 | 1.21 | 0.22 | 3.9E-01 |
| rs10513337 | AGTR1   | 3   | 149933664 | A   | 394 | 0.84 | 0.30 | 5.5E-01 | A                        | 292 | 0.63 | 0.41 | 2.6E-01 | A             | 281 | 1.06 | 0.36 | 8.8E-01 |
| rs10515639 | CAMK2A  | 5   | 149636619 | T   | 392 | 0.91 | 0.17 | 6.0E-01 | T                        | 291 | 0.87 | 0.21 | 5.1E-01 | T             | 279 | 1.04 | 0.22 | 8.7E-01 |
| rs10515826 | GABRB2  | 5   | 160682403 | T   | 394 | 1.20 | 0.27 | 5.0E-01 | T                        | 292 | 1.11 | 0.33 | 7.5E-01 | T             | 281 | 1.28 | 0.34 | 4.7E-01 |
| rs10517    | NQO1    | 16  | 68301261  | A   | 394 | 1.87 | 0.23 | 7.4E-03 | A                        | 292 | 2.30 | 0.27 | 1.7E-03 | A             | 281 | 1.36 | 0.31 | 3.2E-01 |
| rs10517171 | GABRA4  | 4   | 46677066  | T   | 394 | 0.79 | 0.26 | 3.7E-01 | T                        | 292 | 0.88 | 0.31 | 6.6E-01 | T             | 281 | 0.67 | 0.35 | 2.5E-01 |
| rs10517665 | GRIA2   | 4   | 158421852 | C   | 394 | 1.09 | 0.20 | 6.8E-01 | C                        | 292 | 1.08 | 0.25 | 7.7E-01 | C             | 281 | 1.11 | 0.25 | 6.9E-01 |
| rs1052264  | TMSB10  | 2   | 84987435  | C   | 393 | 1.22 | 0.20 | 3.3E-01 | C                        | 291 | 1.25 | 0.24 | 3.6E-01 | C             | 280 | 1.17 | 0.25 | 5.4E-01 |
| rs1053989  | CRHBP   | 5   | 76300791  | A   | 384 | 0.91 | 0.15 | 5.1E-01 | A                        | 283 | 0.88 | 0.18 | 4.8E-01 | A             | 275 | 1.01 | 0.19 | 9.4E-01 |
| rs1054713  | KLK1    | 19  | 56015313  | A   | 394 | 0.95 | 0.15 | 7.1E-01 | A                        | 292 | 0.82 | 0.18 | 2.9E-01 | A             | 281 | 1.06 | 0.18 | 7.4E-01 |
| rs1055114  | ARL5B   | 10  | 19006747  | C   | 394 | 0.88 | 0.18 | 4.8E-01 | C                        | 292 | 0.89 | 0.22 | 5.9E-01 | C             | 281 | 1.01 | 0.22 | 9.5E-01 |
| rs1056021  | PRKD3   | 2   | 37333753  | G   | 394 | 0.99 | 0.16 | 9.4E-01 | G                        | 292 | 1.07 | 0.19 | 7.4E-01 | G             | 281 | 0.88 | 0.20 | 5.3E-01 |
| rs1056513  | INADL   | 1   | 62152886  | G   | 394 | 1.52 | 0.16 | 8.7E-03 | G                        | 292 | 1.54 | 0.19 | 2.5E-02 | G             | 281 | 1.47 | 0.19 | 5.0E-02 |
| rs1056810  | DDX24   | 14  | 93593969  | C   | 394 | 0.98 | 0.15 | 8.8E-01 | C                        | 292 | 1.05 | 0.18 | 7.8E-01 | C             | 281 | 0.96 | 0.19 | 8.1E-01 |
| rs1056896  | ACSL1   | 4   | 185914357 | C   | 394 | 0.70 | 0.19 | 6.9E-02 | C                        | 292 | 0.66 | 0.24 | 8.1E-02 | C             | 281 | 0.72 | 0.25 | 1.8E-01 |
| rs1057293  | SGK1    | 6   | 134535090 | A   | 394 | 0.91 | 0.26 | 7.0E-01 | A                        | 292 | 0.94 | 0.31 | 8.5E-01 | A             | 281 | 0.88 | 0.32 | 7.0E-01 |
| rs1057738  | PRKACB  | 1   | 84443404  | A   | 393 | 0.85 | 0.15 | 2.8E-01 | A                        | 291 | 0.94 | 0.18 | 7.1E-01 | A             | 280 | 0.78 | 0.18 | 1.8E-01 |
| rs1057741  | IKBKB   | 8   | 42307707  | A   | 388 | 0.90 | 0.45 | 8.2E-01 | A                        | 286 | 0.54 | 0.67 | 3.5E-01 | A             | 278 | 1.42 | 0.51 | 4.9E-01 |
| rs1057911  | CYP2C9  | 10  | 96738727  | T   | 394 | 0.68 | 0.31 | 2.2E-01 | T                        | 292 | 0.51 | 0.41 | 1.1E-01 | T             | 281 | 0.81 | 0.37 | 5.7E-01 |
| rs1057985  | SLC29A1 | 6   | 44293879  | T   | 394 | 1.14 | 0.15 | 4.0E-01 | T                        | 292 | 1.01 | 0.19 | 9.7E-01 | T             | 281 | 1.24 | 0.19 | 2.6E-01 |
| rs1058172  | CYP2D6  | 22  | 40853472  | T   | 378 | 0.78 | 0.21 | 2.4E-01 | T                        | 278 | 0.55 | 0.27 | 2.6E-02 | T             | 272 | 1.01 | 0.26 | 9.6E-01 |

| SNP        | GENE    | CHR | BP        | TMD |     |      |      |         | TMD with widespread pain |     |      |      |         | Localized TMD |     |      |      |         |
|------------|---------|-----|-----------|-----|-----|------|------|---------|--------------------------|-----|------|------|---------|---------------|-----|------|------|---------|
|            |         |     |           | A1  | N   | OR   | SE   | P       | A1                       | N   | OR   | SE   | P       | A1            | N   | OR   | SE   | P       |
| rs1059623  | HSPCA   | 14  | 101616971 | G   | 394 | 1.09 | 0.23 | 7.3E-01 | G                        | 292 | 1.03 | 0.29 | 9.1E-01 | G             | 281 | 1.10 | 0.29 | 7.4E-01 |
| rs1060822  | NOS2A   | 17  | 23116758  | A   | 394 | 1.25 | 0.15 | 1.4E-01 | A                        | 292 | 1.27 | 0.18 | 1.9E-01 | A             | 281 | 1.30 | 0.19 | 1.6E-01 |
| rs1060826  | NOS2A   | 17  | 23113994  | T   | 394 | 1.25 | 0.15 | 1.4E-01 | T                        | 292 | 1.27 | 0.18 | 1.9E-01 | T             | 281 | 1.30 | 0.19 | 1.6E-01 |
| rs1061332  | SC5DL   | 11  | 120683512 | A   | 393 | 1.09 | 0.15 | 5.7E-01 | A                        | 291 | 1.05 | 0.19 | 7.8E-01 | A             | 280 | 1.10 | 0.20 | 6.2E-01 |
| rs1064448  | ADCY7   | 16  | 48908384  | T   | 394 | 0.94 | 0.15 | 6.6E-01 | T                        | 292 | 1.07 | 0.18 | 7.2E-01 | T             | 281 | 0.83 | 0.19 | 3.2E-01 |
| rs1065776  | P2RY1   | 3   | 154036318 | T   | 392 | 0.75 | 0.35 | 4.1E-01 | T                        | 291 | 0.67 | 0.45 | 3.7E-01 | T             | 280 | 0.85 | 0.44 | 7.1E-01 |
| rs1071502  | GRIN2A  | 16  | 10169313  | C   | 394 | 0.82 | 0.16 | 2.1E-01 | C                        | 292 | 0.97 | 0.19 | 8.5E-01 | C             | 281 | 0.65 | 0.21 | 3.8E-02 |
| rs1071676  | IL1B    | 2   | 113303904 | G   | 394 | 1.15 | 0.17 | 4.1E-01 | G                        | 292 | 1.20 | 0.20 | 3.6E-01 | G             | 281 | 1.08 | 0.21 | 7.2E-01 |
| rs1072982  | ATP1B3  | 3   | 143095063 | G   | 394 | 0.93 | 0.15 | 6.1E-01 | G                        | 292 | 0.93 | 0.18 | 6.8E-01 | G             | 281 | 0.92 | 0.19 | 6.6E-01 |
| rs10732882 | P2RX3   | 11  | 56868269  | T   | 394 | 0.96 | 0.15 | 7.7E-01 | T                        | 292 | 1.12 | 0.18 | 5.0E-01 | T             | 281 | 0.82 | 0.18 | 2.7E-01 |
| rs10735380 | IGF1    | 12  | 101368366 | G   | 394 | 0.81 | 0.16 | 1.8E-01 | G                        | 292 | 0.83 | 0.19 | 3.4E-01 | G             | 281 | 0.81 | 0.20 | 2.8E-01 |
| rs10735510 | ATF3    | 1   | 210852083 | G   | 394 | 1.07 | 0.14 | 6.4E-01 | G                        | 292 | 1.03 | 0.16 | 8.8E-01 | G             | 281 | 1.16 | 0.17 | 3.7E-01 |
| rs10738329 | MPDZ    | 9   | 13222472  | T   | 394 | 1.06 | 0.20 | 7.7E-01 | T                        | 292 | 0.96 | 0.26 | 8.9E-01 | T             | 281 | 1.24 | 0.24 | 3.8E-01 |
| rs10741127 | ARL5B   | 10  | 18997653  | G   | 394 | 1.05 | 0.15 | 7.7E-01 | G                        | 292 | 1.07 | 0.18 | 7.2E-01 | G             | 281 | 0.95 | 0.19 | 7.7E-01 |
| rs1074287  | OPRM1   | 6   | 154390502 | G   | 393 | 0.94 | 0.16 | 7.1E-01 | G                        | 291 | 0.84 | 0.20 | 4.0E-01 | G             | 281 | 1.07 | 0.20 | 7.4E-01 |
| rs10745288 | AIM     | 10  | 49801403  | G   | 394 | 1.18 | 0.14 | 2.4E-01 | G                        | 292 | 1.27 | 0.17 | 1.6E-01 | G             | 281 | 1.06 | 0.18 | 7.4E-01 |
| rs10746750 | NTRK2   | 9   | 86574354  | G   | 393 | 1.07 | 0.15 | 6.4E-01 | G                        | 291 | 1.19 | 0.18 | 3.3E-01 | G             | 280 | 1.00 | 0.19 | 9.8E-01 |
| rs10748185 | TPH2    | 12  | 70622122  | A   | 394 | 1.12 | 0.14 | 4.3E-01 | A                        | 292 | 1.05 | 0.18 | 8.0E-01 | A             | 281 | 1.15 | 0.18 | 4.3E-01 |
| rs10752989 | PLA2G4A | 1   | 185222053 | T   | 393 | 0.79 | 0.15 | 1.1E-01 | T                        | 291 | 0.82 | 0.18 | 2.7E-01 | T             | 281 | 0.76 | 0.19 | 1.4E-01 |
| rs10754261 | GBP2    | 1   | 89363670  | T   | 393 | 1.03 | 0.15 | 8.6E-01 | T                        | 291 | 0.94 | 0.18 | 7.3E-01 | T             | 280 | 1.03 | 0.19 | 8.7E-01 |
| rs10754555 | NLRP3   | 1   | 245651266 | G   | 392 | 0.85 | 0.14 | 2.7E-01 | G                        | 290 | 0.84 | 0.17 | 3.1E-01 | G             | 281 | 0.87 | 0.18 | 4.3E-01 |
| rs10754558 | NLRP3   | 1   | 245678659 | G   | 394 | 1.26 | 0.15 | 1.3E-01 | G                        | 292 | 1.26 | 0.18 | 2.0E-01 | G             | 281 | 1.23 | 0.19 | 2.7E-01 |
| rs10759    | RGS4    | 1   | 161312975 | T   | 394 | 1.13 | 0.16 | 4.4E-01 | T                        | 292 | 1.30 | 0.19 | 1.7E-01 | T             | 281 | 1.00 | 0.20 | 9.9E-01 |
| rs1076292  | CRHR2   | 7   | 30679226  | C   | 392 | 1.10 | 0.15 | 5.2E-01 | C                        | 290 | 1.16 | 0.19 | 4.3E-01 | C             | 279 | 1.11 | 0.19 | 5.7E-01 |
| rs10763013 | AIM     | 10  | 55283129  | T   | 394 | 1.05 | 0.19 | 7.8E-01 | T                        | 292 | 0.81 | 0.24 | 3.7E-01 | T             | 281 | 1.27 | 0.23 | 2.9E-01 |
| rs1076563  | DRD2    | 11  | 112801119 | A   | 394 | 1.21 | 0.14 | 2.0E-01 | A                        | 292 | 1.07 | 0.17 | 7.2E-01 | A             | 281 | 1.39 | 0.18 | 7.3E-02 |
| rs10770140 | TH      | 11  | 2150173   | C   | 383 | 1.01 | 0.15 | 9.3E-01 | C                        | 283 | 0.97 | 0.18 | 8.7E-01 | C             | 273 | 1.05 | 0.18 | 8.1E-01 |
| rs10772717 | GRIN2B  | 12  | 13931914  | G   | 394 | 0.89 | 0.15 | 4.1E-01 | G                        | 292 | 0.74 | 0.19 | 1.1E-01 | G             | 281 | 1.09 | 0.18 | 6.3E-01 |
| rs10776727 | ADORA3  | 1   | 111848549 | C   | 394 | 1.32 | 0.14 | 4.9E-02 | C                        | 292 | 1.44 | 0.18 | 3.9E-02 | C             | 281 | 1.31 | 0.18 | 1.2E-01 |
| rs10776733 | ADORA3  | 1   | 111909192 | A   | 394 | 0.87 | 0.14 | 3.2E-01 | A                        | 292 | 0.92 | 0.17 | 6.4E-01 | A             | 281 | 0.78 | 0.18 | 1.7E-01 |
| rs10783389 | ATF1    | 12  | 49476873  | T   | 392 | 0.84 | 0.16 | 2.8E-01 | T                        | 290 | 0.83 | 0.19 | 3.4E-01 | T             | 280 | 0.81 | 0.20 | 2.7E-01 |
| rs10783462 | SCN8A   | 12  | 50316641  | G   | 394 | 0.75 | 0.19 | 1.4E-01 | G                        | 292 | 0.67 | 0.24 | 1.0E-01 | G             | 281 | 0.83 | 0.23 | 4.4E-01 |
| rs10785952 | AIM     | 10  | 92038772  | G   | 394 | 0.88 | 0.15 | 3.8E-01 | G                        | 292 | 0.72 | 0.18 | 7.2E-02 | G             | 281 | 1.08 | 0.19 | 6.9E-01 |
| rs1079078  | ADRA1A  | 8   | 26753964  | C   | 394 | 0.99 | 0.17 | 9.3E-01 | C                        | 292 | 0.77 | 0.22 | 2.4E-01 | C             | 281 | 1.24 | 0.20 | 2.8E-01 |
| rs10795588 | AIM     | 10  | 8126176   | G   | 393 | 0.87 | 0.14 | 3.3E-01 | G                        | 291 | 0.82 | 0.17 | 2.4E-01 | G             | 281 | 0.93 | 0.17 | 6.5E-01 |
| rs1079596  | DRD2    | 11  | 112801829 | T   | 393 | 1.12 | 0.21 | 5.8E-01 | T                        | 291 | 0.88 | 0.27 | 6.2E-01 | T             | 281 | 1.39 | 0.25 | 1.9E-01 |
| rs10799897 | RGS4    | 1   | 161309712 | G   | 393 | 1.24 | 0.14 | 1.2E-01 | G                        | 291 | 1.11 | 0.17 | 5.5E-01 | G             | 281 | 1.40 | 0.17 | 5.1E-02 |
| rs10802184 | AIM     | 1   | 116680864 | T   | 394 | 0.97 | 0.24 | 9.1E-01 | T                        | 292 | 1.41 | 0.26 | 1.9E-01 | T             | 281 | 0.53 | 0.37 | 8.5E-02 |
| rs10802501 | NLRP3   | 1   | 245678825 | A   | 394 | 0.96 | 0.19 | 8.5E-01 | A                        | 292 | 1.15 | 0.23 | 5.4E-01 | A             | 281 | 0.76 | 0.25 | 2.6E-01 |

| SNP        | GENE    | CHR | BP        | TMD |     |      |      |         | TMD with widespread pain |     |      |      |         | Localized TMD |     |      |      |         |
|------------|---------|-----|-----------|-----|-----|------|------|---------|--------------------------|-----|------|------|---------|---------------|-----|------|------|---------|
|            |         |     |           | A1  | N   | OR   | SE   | P       | A1                       | N   | OR   | SE   | P       | A1            | N   | OR   | SE   | P       |
| rs1080327  | CCL2    | 17  | 29615779  | A   | 394 | 0.95 | 0.16 | 7.5E-01 | A                        | 292 | 0.82 | 0.20 | 3.2E-01 | A             | 281 | 1.10 | 0.20 | 6.3E-01 |
| rs10803665 | TRPM8   | 2   | 234499373 | T   | 393 | 0.94 | 0.25 | 7.9E-01 | T                        | 291 | 0.89 | 0.30 | 7.0E-01 | T             | 280 | 1.01 | 0.31 | 9.8E-01 |
| rs10809907 | MPDZ    | 9   | 13124432  | C   | 394 | 0.76 | 0.15 | 7.4E-02 | C                        | 292 | 0.76 | 0.18 | 1.4E-01 | C             | 281 | 0.75 | 0.20 | 1.5E-01 |
| rs10809913 | MPDZ    | 9   | 13171898  | A   | 394 | 0.82 | 0.16 | 2.1E-01 | A                        | 292 | 0.79 | 0.20 | 2.2E-01 | A             | 281 | 0.88 | 0.20 | 5.1E-01 |
| rs10818739 | GABBR2  | 9   | 100093628 | G   | 391 | 1.13 | 0.18 | 5.0E-01 | G                        | 290 | 1.14 | 0.22 | 5.6E-01 | G             | 279 | 1.30 | 0.23 | 2.6E-01 |
| rs10822131 | PRKG1   | 10  | 52459022  | T   | 394 | 1.10 | 0.17 | 5.6E-01 | T                        | 292 | 1.13 | 0.20 | 5.5E-01 | T             | 281 | 1.14 | 0.21 | 5.3E-01 |
| rs10822178 | PRKG1   | 10  | 52501587  | A   | 394 | 0.76 | 0.15 | 5.8E-02 | A                        | 292 | 0.78 | 0.18 | 1.7E-01 | A             | 281 | 0.74 | 0.19 | 1.1E-01 |
| rs10845848 | GRIN2B  | 12  | 13913138  | A   | 394 | 1.13 | 0.14 | 3.9E-01 | A                        | 292 | 1.11 | 0.17 | 5.5E-01 | A             | 281 | 1.19 | 0.18 | 3.3E-01 |
| rs10847171 | AIM     | 12  | 125546608 | C   | 393 | 1.08 | 0.15 | 6.1E-01 | C                        | 292 | 0.99 | 0.19 | 9.7E-01 | C             | 280 | 1.15 | 0.19 | 4.7E-01 |
| rs10848623 | SLC6A13 | 12  | 229724    | G   | 393 | 0.91 | 0.16 | 5.5E-01 | G                        | 291 | 0.92 | 0.19 | 6.5E-01 | G             | 280 | 0.91 | 0.20 | 6.3E-01 |
| rs10853843 | FPR2    | 19  | 56959373  | C   | 394 | 1.03 | 0.18 | 8.6E-01 | C                        | 292 | 0.94 | 0.22 | 7.6E-01 | C             | 281 | 1.15 | 0.21 | 5.2E-01 |
| rs10860865 | IGF1    | 12  | 101355852 | T   | 394 | 0.77 | 0.16 | 9.8E-02 | T                        | 292 | 0.80 | 0.19 | 2.6E-01 | T             | 281 | 0.76 | 0.20 | 1.6E-01 |
| rs10864166 | KCNK2   | 1   | 213470741 | C   | 392 | 0.90 | 0.15 | 4.9E-01 | C                        | 290 | 1.24 | 0.19 | 2.6E-01 | C             | 281 | 0.66 | 0.20 | 3.3E-02 |
| rs10865408 | TACR1   | 2   | 75257298  | A   | 394 | 0.70 | 0.17 | 4.2E-02 | A                        | 292 | 0.69 | 0.22 | 8.8E-02 | A             | 281 | 0.74 | 0.22 | 1.6E-01 |
| rs10865918 | CCK     | 3   | 42278315  | C   | 394 | 1.10 | 0.14 | 5.2E-01 | C                        | 292 | 1.25 | 0.17 | 2.0E-01 | C             | 281 | 0.99 | 0.18 | 9.8E-01 |
| rs10868793 | AIM     | 9   | 90352033  | T   | 376 | 0.75 | 0.22 | 2.0E-01 | T                        | 281 | 0.77 | 0.27 | 3.3E-01 | T             | 268 | 0.73 | 0.29 | 2.7E-01 |
| rs10869229 | ANXA1   | 9   | 74957914  | G   | 394 | 0.82 | 0.14 | 1.5E-01 | G                        | 292 | 0.79 | 0.17 | 1.7E-01 | G             | 281 | 0.87 | 0.18 | 4.3E-01 |
| rs10873531 | HSPCA   | 14  | 101638049 | G   | 394 | 0.98 | 0.21 | 9.2E-01 | G                        | 292 | 0.96 | 0.26 | 8.7E-01 | G             | 281 | 0.95 | 0.26 | 8.3E-01 |
| rs10873637 | GABRB3  | 15  | 24477858  | A   | 393 | 0.80 | 0.17 | 1.9E-01 | A                        | 291 | 0.76 | 0.21 | 1.9E-01 | A             | 280 | 0.81 | 0.22 | 3.4E-01 |
| rs10875995 | ACCN2   | 12  | 48748405  | C   | 394 | 1.06 | 0.15 | 7.1E-01 | C                        | 292 | 0.93 | 0.19 | 7.1E-01 | C             | 281 | 1.26 | 0.18 | 2.1E-01 |
| rs10879311 | AIM     | 12  | 70352255  | A   | 394 | 1.00 | 0.18 | 1.0E+00 | A                        | 292 | 0.92 | 0.22 | 7.1E-01 | A             | 281 | 0.98 | 0.22 | 9.4E-01 |
| rs10883439 | CPN1    | 10  | 101831143 | A   | 393 | 1.32 | 0.22 | 2.1E-01 | A                        | 291 | 1.36 | 0.26 | 2.5E-01 | A             | 280 | 1.36 | 0.27 | 2.6E-01 |
| rs10884188 | AIM     | 10  | 107333364 | G   | 394 | 1.16 | 0.14 | 3.0E-01 | G                        | 292 | 1.44 | 0.17 | 3.6E-02 | G             | 281 | 0.96 | 0.18 | 8.0E-01 |
| rs10886437 | GRK5    | 10  | 121027144 | T   | 394 | 0.88 | 0.19 | 5.1E-01 | T                        | 292 | 0.86 | 0.23 | 5.1E-01 | T             | 281 | 0.84 | 0.24 | 4.7E-01 |
| rs10886462 | GRK5    | 10  | 121095301 | G   | 394 | 0.94 | 0.15 | 7.0E-01 | G                        | 292 | 0.77 | 0.19 | 1.8E-01 | G             | 281 | 1.09 | 0.19 | 6.5E-01 |
| rs10889272 | INADL   | 1   | 62175137  | C   | 391 | 0.93 | 0.15 | 6.2E-01 | C                        | 289 | 0.79 | 0.19 | 2.2E-01 | C             | 279 | 1.11 | 0.19 | 5.8E-01 |
| rs10895871 | GRIA4   | 11  | 105108090 | G   | 393 | 0.95 | 0.14 | 7.1E-01 | G                        | 291 | 1.03 | 0.18 | 8.7E-01 | G             | 281 | 0.91 | 0.18 | 5.8E-01 |
| rs10895877 | GRIA4   | 11  | 105195814 | A   | 394 | 0.88 | 0.23 | 5.7E-01 | A                        | 292 | 0.74 | 0.29 | 2.9E-01 | A             | 281 | 0.99 | 0.28 | 9.6E-01 |
| rs10896389 | MRGPRD  | 11  | 68502904  | A   | 392 | 1.01 | 0.14 | 9.5E-01 | A                        | 290 | 1.12 | 0.17 | 5.3E-01 | A             | 281 | 0.85 | 0.19 | 3.8E-01 |
| rs10896607 | P2RX3   | 11  | 56863035  | G   | 390 | 0.87 | 0.16 | 3.6E-01 | G                        | 289 | 0.70 | 0.20 | 6.4E-02 | G             | 279 | 1.04 | 0.19 | 8.5E-01 |
| rs10911946 | PLA2G4A | 1   | 185121829 | T   | 394 | 1.00 | 0.14 | 1.0E+00 | T                        | 292 | 0.87 | 0.17 | 4.2E-01 | T             | 281 | 1.08 | 0.18 | 6.5E-01 |
| rs10917318 | EPHB2   | 1   | 23040646  | T   | 394 | 0.76 | 0.18 | 1.3E-01 | T                        | 292 | 0.76 | 0.23 | 2.2E-01 | T             | 281 | 0.81 | 0.23 | 3.7E-01 |
| rs10920568 | ADORA1  | 1   | 201364898 | G   | 394 | 1.05 | 0.15 | 7.6E-01 | G                        | 292 | 1.10 | 0.19 | 6.3E-01 | G             | 281 | 1.00 | 0.19 | 9.9E-01 |
| rs10920570 | ADORA1  | 1   | 201365441 | G   | 392 | 1.03 | 0.15 | 8.4E-01 | G                        | 290 | 1.08 | 0.19 | 6.9E-01 | G             | 279 | 0.99 | 0.19 | 9.5E-01 |
| rs10920576 | ADORA1  | 1   | 201395802 | T   | 394 | 1.37 | 0.19 | 9.5E-02 | T                        | 292 | 1.14 | 0.23 | 5.6E-01 | T             | 281 | 1.59 | 0.23 | 4.4E-02 |
| rs10929320 | TRPM8   | 2   | 234533124 | T   | 394 | 0.92 | 0.14 | 5.7E-01 | T                        | 292 | 0.87 | 0.17 | 4.3E-01 | T             | 281 | 0.97 | 0.17 | 8.5E-01 |
| rs10929321 | TRPM8   | 2   | 234536082 | G   | 393 | 0.96 | 0.15 | 7.8E-01 | G                        | 291 | 1.03 | 0.18 | 8.6E-01 | G             | 280 | 0.90 | 0.19 | 6.0E-01 |
| rs10930148 | SCN3A   | 2   | 165671518 | C   | 394 | 1.03 | 0.18 | 8.6E-01 | C                        | 292 | 0.94 | 0.22 | 7.6E-01 | C             | 281 | 1.19 | 0.22 | 4.3E-01 |
| rs10930162 | SCN2A   | 2   | 165950074 | G   | 393 | 1.03 | 0.16 | 8.4E-01 | G                        | 291 | 1.02 | 0.20 | 9.4E-01 | G             | 280 | 1.07 | 0.21 | 7.6E-01 |

| SNP        | GENE   | CHR | BP        | TMD |     |      |      |         | TMD with widespread pain |     |      |      |         | Localized TMD |     |      |      |         |
|------------|--------|-----|-----------|-----|-----|------|------|---------|--------------------------|-----|------|------|---------|---------------|-----|------|------|---------|
|            |        |     |           | A1  | N   | OR   | SE   | P       | A1                       | N   | OR   | SE   | P       | A1            | N   | OR   | SE   | P       |
| rs10930202 | SCN1A  | 2   | 166623851 | C   | 394 | 0.74 | 0.21 | 1.5E-01 | C                        | 292 | 0.66 | 0.26 | 1.2E-01 | C             | 281 | 0.77 | 0.26 | 3.1E-01 |
| rs10930214 | SCN9A  | 2   | 166814099 | C   | 394 | 1.09 | 0.15 | 5.9E-01 | C                        | 292 | 1.13 | 0.18 | 5.1E-01 | C             | 281 | 0.95 | 0.20 | 8.0E-01 |
| rs10932201 | CREB1  | 2   | 208134502 | A   | 394 | 1.10 | 0.15 | 5.1E-01 | A                        | 292 | 1.26 | 0.18 | 1.9E-01 | A             | 281 | 1.00 | 0.18 | 9.9E-01 |
| rs1093329  | NOS1   | 12  | 116180547 | A   | 394 | 0.98 | 0.15 | 8.8E-01 | A                        | 292 | 1.26 | 0.18 | 1.9E-01 | A             | 281 | 0.69 | 0.19 | 5.4E-02 |
| rs10933921 | AIM    | 3   | 109082643 | A   | 394 | 1.04 | 0.14 | 7.8E-01 | A                        | 292 | 1.01 | 0.17 | 9.7E-01 | A             | 281 | 1.06 | 0.17 | 7.3E-01 |
| rs10934256 | DRD3   | 3   | 115368342 | A   | 394 | 0.98 | 0.18 | 9.3E-01 | A                        | 292 | 1.21 | 0.21 | 3.7E-01 | A             | 281 | 0.82 | 0.24 | 4.2E-01 |
| rs10935442 | ATP1B3 | 3   | 143077107 | G   | 394 | 0.87 | 0.20 | 4.8E-01 | G                        | 292 | 0.77 | 0.26 | 3.1E-01 | G             | 281 | 1.06 | 0.25 | 8.3E-01 |
| rs10935842 | P2RY12 | 3   | 152586628 | A   | 394 | 1.13 | 0.15 | 4.2E-01 | A                        | 292 | 1.08 | 0.18 | 6.7E-01 | A             | 281 | 1.12 | 0.19 | 5.6E-01 |
| rs10948234 | RUNX2  | 6   | 45482586  | A   | 393 | 0.69 | 0.15 | 1.4E-02 | A                        | 291 | 0.58 | 0.19 | 4.7E-03 | A             | 280 | 0.79 | 0.19 | 2.0E-01 |
| rs10958713 | IKKBK  | 8   | 42299873  | T   | 394 | 0.93 | 0.15 | 6.4E-01 | T                        | 292 | 0.94 | 0.19 | 7.3E-01 | T             | 281 | 0.85 | 0.20 | 4.1E-01 |
| rs10960954 | MPDZ   | 9   | 13110380  | C   | 394 | 0.87 | 0.14 | 3.1E-01 | C                        | 292 | 0.87 | 0.17 | 4.3E-01 | C             | 281 | 0.83 | 0.19 | 3.4E-01 |
| rs10985765 | GABBR2 | 9   | 100095943 | C   | 394 | 1.16 | 0.18 | 4.1E-01 | C                        | 292 | 1.15 | 0.22 | 5.2E-01 | C             | 281 | 1.36 | 0.23 | 1.9E-01 |
| rs10986125 | GABBR2 | 9   | 100208458 | G   | 394 | 0.86 | 0.28 | 5.8E-01 | G                        | 292 | 0.82 | 0.34 | 5.6E-01 | G             | 281 | 0.86 | 0.35 | 6.8E-01 |
| rs10995555 | PRKG1  | 10  | 52503771  | T   | 393 | 0.48 | 0.23 | 1.2E-03 | T                        | 292 | 0.52 | 0.27 | 1.6E-02 | T             | 280 | 0.44 | 0.30 | 6.6E-03 |
| rs10996377 | PRKG1  | 10  | 52690748  | A   | 394 | 1.15 | 0.27 | 5.9E-01 | A                        | 292 | 1.62 | 0.30 | 1.1E-01 | A             | 281 | 0.73 | 0.38 | 4.2E-01 |
| rs11030121 | BDNF   | 11  | 27692783  | T   | 394 | 1.45 | 0.16 | 2.4E-02 | T                        | 292 | 1.18 | 0.20 | 3.9E-01 | T             | 281 | 1.80 | 0.20 | 3.9E-03 |
| rs11046186 | KCNJ8  | 12  | 21829811  | T   | 394 | 1.10 | 0.16 | 5.3E-01 | T                        | 292 | 1.22 | 0.19 | 3.0E-01 | T             | 281 | 0.99 | 0.20 | 9.5E-01 |
| rs11072880 | ZFAND6 | 15  | 78185968  | A   | 393 | 0.81 | 0.16 | 2.1E-01 | A                        | 291 | 0.81 | 0.20 | 2.8E-01 | A             | 281 | 0.70 | 0.22 | 1.0E-01 |
| rs11080233 | ACCN1  | 17  | 29033654  | G   | 393 | 0.83 | 0.20 | 3.6E-01 | G                        | 291 | 0.86 | 0.24 | 5.5E-01 | G             | 280 | 0.78 | 0.26 | 3.4E-01 |
| rs1108581  | DBH    | 9   | 135495062 | G   | 394 | 1.05 | 0.19 | 7.8E-01 | G                        | 292 | 0.98 | 0.23 | 9.3E-01 | G             | 281 | 1.07 | 0.23 | 7.7E-01 |
| rs11098964 | AIM    | 4   | 81106993  | A   | 394 | 1.20 | 0.14 | 1.9E-01 | A                        | 292 | 1.18 | 0.17 | 3.2E-01 | A             | 281 | 1.18 | 0.17 | 3.4E-01 |
| rs11100494 | NPY5R  | 4   | 164489703 | A   | 394 | 1.71 | 0.31 | 7.9E-02 | A                        | 292 | 1.74 | 0.36 | 1.2E-01 | A             | 281 | 1.53 | 0.37 | 2.4E-01 |
| rs11102930 | NGF    | 1   | 115682578 | G   | 394 | 0.95 | 0.15 | 7.1E-01 | G                        | 292 | 1.02 | 0.17 | 9.2E-01 | G             | 281 | 0.92 | 0.18 | 6.4E-01 |
| rs11105345 | ATP2B1 | 12  | 88540933  | A   | 394 | 0.74 | 0.45 | 5.0E-01 | A                        | 292 | 1.06 | 0.49 | 9.1E-01 | A             | 281 | 0.32 | 0.77 | 1.4E-01 |
| rs11105356 | ATP2B1 | 12  | 88559164  | T   | 394 | 0.74 | 0.45 | 5.0E-01 | T                        | 292 | 1.06 | 0.49 | 9.1E-01 | T             | 281 | 0.32 | 0.77 | 1.4E-01 |
| rs11105358 | ATP2B1 | 12  | 88566273  | C   | 394 | 0.92 | 0.15 | 5.9E-01 | C                        | 292 | 1.02 | 0.18 | 9.3E-01 | C             | 281 | 0.83 | 0.20 | 3.5E-01 |
| rs11111267 | IGF1   | 12  | 101335369 | G   | 393 | 0.66 | 0.19 | 2.7E-02 | G                        | 291 | 0.70 | 0.23 | 1.1E-01 | G             | 280 | 0.60 | 0.25 | 3.7E-02 |
| rs11119989 | ATF3   | 1   | 210862315 | T   | 394 | 0.59 | 0.74 | 4.8E-01 | T                        | 292 | 0.36 | 1.10 | 3.5E-01 | T             | 281 | 0.80 | 0.85 | 8.0E-01 |
| rs11122576 | AGT    | 1   | 228913302 | C   | 392 | 0.93 | 0.25 | 7.7E-01 | C                        | 290 | 0.97 | 0.30 | 9.3E-01 | C             | 279 | 0.90 | 0.33 | 7.5E-01 |
| rs11123519 | DBI    | 2   | 119844012 | A   | 394 | 0.77 | 0.17 | 1.3E-01 | A                        | 292 | 0.62 | 0.23 | 3.3E-02 | A             | 281 | 0.92 | 0.21 | 6.8E-01 |
| rs11126303 | AIM    | 2   | 26027007  | G   | 393 | 1.94 | 0.45 | 1.4E-01 | G                        | 291 | 0.90 | 0.72 | 8.8E-01 | G             | 280 | 4.47 | 0.52 | 3.8E-03 |
| rs11129800 | SCN10A | 3   | 38719374  | T   | 393 | 0.79 | 0.15 | 1.1E-01 | T                        | 292 | 0.74 | 0.18 | 9.8E-02 | T             | 280 | 0.78 | 0.18 | 1.8E-01 |
| rs11129802 | SCN10A | 3   | 38725440  | T   | 394 | 1.16 | 0.24 | 5.5E-01 | T                        | 292 | 1.42 | 0.28 | 2.1E-01 | T             | 281 | 0.91 | 0.33 | 7.8E-01 |
| rs11135176 | GABRG2 | 5   | 161455134 | T   | 394 | 0.93 | 0.26 | 7.9E-01 | T                        | 292 | 0.78 | 0.33 | 4.6E-01 | T             | 281 | 1.08 | 0.31 | 8.1E-01 |
| rs11136793 | AIM    | 8   | 4767247   | G   | 394 | 1.02 | 0.15 | 8.8E-01 | G                        | 292 | 0.98 | 0.18 | 8.9E-01 | G             | 281 | 1.11 | 0.19 | 5.7E-01 |
| rs11143275 | ZFAND5 | 9   | 74165556  | A   | 393 | 0.70 | 0.30 | 2.3E-01 | A                        | 291 | 0.62 | 0.38 | 2.0E-01 | A             | 280 | 0.78 | 0.37 | 4.9E-01 |
| rs11150610 | ITGAM  | 16  | 31241737  | A   | 393 | 0.93 | 0.14 | 6.2E-01 | A                        | 291 | 1.01 | 0.18 | 9.4E-01 | A             | 280 | 0.91 | 0.18 | 5.9E-01 |
| rs11167557 | GLRA1  | 5   | 151206950 | G   | 394 | 0.91 | 0.14 | 4.8E-01 | G                        | 292 | 0.84 | 0.17 | 3.0E-01 | G             | 281 | 0.93 | 0.18 | 7.0E-01 |
| rs11169552 | ATF1   | 12  | 49441930  | T   | 394 | 0.86 | 0.16 | 3.1E-01 | T                        | 292 | 0.85 | 0.19 | 3.8E-01 | T             | 281 | 0.81 | 0.20 | 2.9E-01 |

| SNP        | GENE   | CHR | BP        | TMD |     |      |      |         | TMD with widespread pain |     |      |      |         | Localized TMD |     |      |      |         |
|------------|--------|-----|-----------|-----|-----|------|------|---------|--------------------------|-----|------|------|---------|---------------|-----|------|------|---------|
|            |        |     |           | A1  | N   | OR   | SE   | P       | A1                       | N   | OR   | SE   | P       | A1            | N   | OR   | SE   | P       |
| rs11169567 | ATF1   | 12  | 49491205  | C   | 394 | 1.02 | 0.14 | 8.9E-01 | C                        | 292 | 1.01 | 0.18 | 9.5E-01 | C             | 281 | 1.08 | 0.18 | 6.6E-01 |
| rs11179002 | TPH2   | 12  | 70628551  | T   | 394 | 0.98 | 0.15 | 8.8E-01 | T                        | 292 | 1.08 | 0.18 | 6.5E-01 | T             | 281 | 0.89 | 0.20 | 5.7E-01 |
| rs11184898 | AIM    | 1   | 106755851 | T   | 394 | 0.85 | 0.15 | 2.9E-01 | T                        | 292 | 0.72 | 0.19 | 7.3E-02 | T             | 281 | 1.09 | 0.19 | 6.5E-01 |
| rs11198874 | GRK5   | 10  | 121068504 | A   | 394 | 0.44 | 0.35 | 2.0E-02 | A                        | 292 | 0.49 | 0.43 | 9.3E-02 | A             | 281 | 0.39 | 0.49 | 5.6E-02 |
| rs11203006 | AIM    | 10  | 90906065  | G   | 388 | 1.05 | 0.19 | 7.8E-01 | G                        | 286 | 0.92 | 0.23 | 7.2E-01 | G             | 278 | 1.16 | 0.23 | 5.1E-01 |
| rs1120905  | GRIN2B | 12  | 13895444  | G   | 393 | 1.14 | 0.15 | 3.6E-01 | G                        | 291 | 0.98 | 0.18 | 9.2E-01 | G             | 281 | 1.33 | 0.19 | 1.3E-01 |
| rs11209710 | PTGER3 | 1   | 71137606  | C   | 394 | 1.02 | 0.15 | 8.8E-01 | C                        | 292 | 1.00 | 0.19 | 9.9E-01 | C             | 281 | 1.09 | 0.19 | 6.5E-01 |
| rs11209715 | PTGER3 | 1   | 71147951  | A   | 394 | 0.90 | 0.14 | 4.4E-01 | A                        | 292 | 0.98 | 0.17 | 8.9E-01 | A             | 281 | 0.79 | 0.19 | 2.1E-01 |
| rs11218941 | HSPA8  | 11  | 122437619 | G   | 394 | 1.34 | 0.18 | 1.1E-01 | G                        | 292 | 1.01 | 0.23 | 9.8E-01 | G             | 281 | 1.63 | 0.21 | 2.2E-02 |
| rs11226804 | GRIA4  | 11  | 104983227 | C   | 394 | 0.69 | 0.39 | 3.4E-01 | C                        | 292 | 0.84 | 0.45 | 6.9E-01 | C             | 281 | 0.45 | 0.57 | 1.6E-01 |
| rs11226805 | GRIA4  | 11  | 104987234 | T   | 392 | 0.98 | 0.14 | 8.9E-01 | T                        | 290 | 0.92 | 0.17 | 6.1E-01 | T             | 280 | 1.06 | 0.17 | 7.3E-01 |
| rs11226839 | GRIA4  | 11  | 105128159 | A   | 394 | 0.84 | 0.22 | 4.4E-01 | A                        | 292 | 0.71 | 0.29 | 2.2E-01 | A             | 281 | 0.99 | 0.27 | 9.6E-01 |
| rs11227247 | RELA   | 11  | 65179429  | C   | 394 | 0.84 | 0.21 | 4.0E-01 | C                        | 292 | 0.99 | 0.25 | 9.7E-01 | C             | 281 | 0.69 | 0.29 | 1.9E-01 |
| rs1123425  | NOS1   | 12  | 116270488 | G   | 394 | 1.04 | 0.14 | 7.7E-01 | G                        | 292 | 1.32 | 0.17 | 1.1E-01 | G             | 281 | 0.87 | 0.18 | 4.6E-01 |
| rs11235711 | P2RY6  | 11  | 72669991  | C   | 383 | 0.95 | 0.20 | 7.8E-01 | C                        | 284 | 1.23 | 0.24 | 3.9E-01 | C             | 273 | 0.83 | 0.28 | 5.1E-01 |
| rs11249209 | RUNX3  | 1   | 25162014  | A   | 394 | 1.03 | 0.22 | 9.1E-01 | A                        | 292 | 0.82 | 0.28 | 4.8E-01 | A             | 281 | 1.23 | 0.27 | 4.4E-01 |
| rs1127231  | VPS4A  | 16  | 67912464  | G   | 394 | 0.99 | 0.15 | 9.4E-01 | G                        | 292 | 1.04 | 0.19 | 8.2E-01 | G             | 281 | 1.07 | 0.20 | 7.2E-01 |
| rs1128994  | NTRK3  | 15  | 86481688  | A   | 386 | 0.66 | 0.17 | 1.3E-02 | A                        | 285 | 0.62 | 0.21 | 2.0E-02 | A             | 276 | 0.71 | 0.22 | 1.1E-01 |
| rs1129235  | TRPV2  | 17  | 16266730  | C   | 394 | 1.19 | 0.15 | 2.4E-01 | C                        | 292 | 1.23 | 0.18 | 2.5E-01 | C             | 281 | 1.22 | 0.18 | 2.8E-01 |
| rs1129304  | GLRB   | 4   | 158311872 | A   | 387 | 1.26 | 0.15 | 1.2E-01 | A                        | 288 | 1.42 | 0.18 | 5.4E-02 | A             | 276 | 1.06 | 0.19 | 7.6E-01 |
| rs1130371  | CCL3   | 17  | 31440650  | A   | 387 | 1.28 | 0.17 | 1.5E-01 | A                        | 287 | 1.24 | 0.21 | 2.9E-01 | A             | 274 | 1.38 | 0.22 | 1.4E-01 |
| rs1137070  | MAOA   | 23  | 43488335  | T   | 394 | 0.97 | 0.15 | 8.2E-01 | T                        | 292 | 1.00 | 0.18 | 9.8E-01 | T             | 281 | 0.88 | 0.19 | 5.0E-01 |
| rs1137933  | NOS2A  | 17  | 23130059  | A   | 394 | 0.77 | 0.17 | 1.3E-01 | A                        | 292 | 0.80 | 0.21 | 2.8E-01 | A             | 281 | 0.72 | 0.23 | 1.5E-01 |
| rs1140475  | EGFR   | 7   | 55233911  | T   | 394 | 1.13 | 0.20 | 5.4E-01 | T                        | 292 | 1.01 | 0.25 | 9.6E-01 | T             | 281 | 1.24 | 0.25 | 3.8E-01 |
| rs1143623  | IL1B   | 2   | 113312300 | G   | 394 | 1.13 | 0.17 | 4.6E-01 | G                        | 292 | 1.18 | 0.20 | 4.1E-01 | G             | 281 | 1.21 | 0.22 | 3.8E-01 |
| rs1143627  | IL1B   | 2   | 113310858 | G   | 394 | 0.96 | 0.16 | 8.1E-01 | G                        | 292 | 1.00 | 0.18 | 9.9E-01 | G             | 281 | 0.96 | 0.20 | 8.6E-01 |
| rs1143634  | IL1B   | 2   | 113306861 | A   | 394 | 1.15 | 0.17 | 4.1E-01 | A                        | 292 | 1.20 | 0.20 | 3.6E-01 | A             | 281 | 1.08 | 0.21 | 7.2E-01 |
| rs1143643  | IL1B   | 2   | 113304773 | T   | 393 | 0.97 | 0.15 | 8.4E-01 | T                        | 291 | 0.89 | 0.19 | 5.2E-01 | T             | 280 | 1.04 | 0.20 | 8.6E-01 |
| rs1144410  | GRIA4  | 11  | 105285335 | A   | 394 | 0.88 | 0.15 | 4.0E-01 | A                        | 292 | 0.84 | 0.19 | 3.6E-01 | A             | 281 | 0.87 | 0.19 | 4.8E-01 |
| rs1150226  | HTR3A  | 11  | 113350751 | A   | 394 | 0.81 | 0.27 | 4.3E-01 | A                        | 292 | 0.66 | 0.35 | 2.5E-01 | A             | 281 | 1.01 | 0.32 | 9.7E-01 |
| rs11536889 | TLR4   | 9   | 119517952 | C   | 394 | 1.16 | 0.20 | 4.8E-01 | C                        | 292 | 1.32 | 0.23 | 2.4E-01 | C             | 281 | 0.90 | 0.27 | 6.9E-01 |
| rs11542313 | GAD1   | 2   | 171386871 | C   | 393 | 1.06 | 0.14 | 6.6E-01 | C                        | 291 | 1.17 | 0.17 | 3.6E-01 | C             | 280 | 0.90 | 0.18 | 5.5E-01 |
| rs11543848 | EGFR   | 7   | 55196749  | A   | 377 | 0.79 | 0.17 | 1.8E-01 | A                        | 277 | 0.79 | 0.21 | 2.5E-01 | A             | 268 | 0.75 | 0.22 | 2.0E-01 |
| rs11557927 | SCD    | 10  | 102111806 | G   | 392 | 1.48 | 0.24 | 1.0E-01 | G                        | 290 | 1.75 | 0.27 | 3.9E-02 | G             | 280 | 1.04 | 0.30 | 9.0E-01 |
| rs11562954 | TRPM8  | 2   | 234502252 | C   | 394 | 0.89 | 0.24 | 6.3E-01 | C                        | 292 | 0.84 | 0.30 | 5.7E-01 | C             | 281 | 0.95 | 0.31 | 8.7E-01 |
| rs11563056 | TRPM8  | 2   | 234565909 | G   | 394 | 0.88 | 0.15 | 4.1E-01 | G                        | 292 | 0.65 | 0.19 | 2.4E-02 | G             | 281 | 1.12 | 0.19 | 5.4E-01 |
| rs11563071 | TRPM8  | 2   | 234580279 | G   | 393 | 1.08 | 0.23 | 7.5E-01 | G                        | 291 | 0.99 | 0.28 | 9.6E-01 | G             | 280 | 1.12 | 0.28 | 6.9E-01 |
| rs11563202 | TRPM8  | 2   | 234587101 | C   | 394 | 0.70 | 0.19 | 6.0E-02 | C                        | 292 | 0.68 | 0.24 | 1.0E-01 | C             | 281 | 0.79 | 0.24 | 3.1E-01 |
| rs11563208 | TRPM8  | 2   | 234569817 | T   | 393 | 0.85 | 0.16 | 2.9E-01 | T                        | 291 | 1.02 | 0.18 | 9.0E-01 | T             | 281 | 0.68 | 0.21 | 6.3E-02 |



| SNP        | GENE    | CHR | BP        | TMD |     |      |      |         | TMD with widespread pain |     |      |      |         | Localized TMD |     |      |      |         |
|------------|---------|-----|-----------|-----|-----|------|------|---------|--------------------------|-----|------|------|---------|---------------|-----|------|------|---------|
|            |         |     |           | A1  | N   | OR   | SE   | P       | A1                       | N   | OR   | SE   | P       | A1            | N   | OR   | SE   | P       |
| rs11568817 | HTR1B   | 6   | 78230101  | C   | 391 | 0.91 | 0.15 | 5.2E-01 | C                        | 290 | 0.88 | 0.18 | 4.7E-01 | C             | 278 | 0.96 | 0.18 | 8.4E-01 |
| rs1157493  | KCNK2   | 1   | 213305580 | A   | 394 | 0.98 | 0.15 | 8.8E-01 | A                        | 292 | 1.13 | 0.18 | 4.7E-01 | A             | 281 | 0.88 | 0.19 | 5.0E-01 |
| rs11575542 | DDC     | 7   | 50498481  | T   | 393 | 1.01 | 0.48 | 9.9E-01 | T                        | 292 | 0.67 | 0.69 | 5.6E-01 | T             | 280 | 1.57 | 0.56 | 4.2E-01 |
| rs1158135  | SCN3A   | 2   | 165688559 | C   | 392 | 0.88 | 0.16 | 4.1E-01 | C                        | 290 | 0.76 | 0.21 | 1.8E-01 | C             | 279 | 1.03 | 0.20 | 8.9E-01 |
| rs11582098 | ADORA1  | 1   | 201349434 | T   | 394 | 1.00 | 0.15 | 1.0E+00 | T                        | 292 | 1.14 | 0.18 | 4.9E-01 | T             | 281 | 0.86 | 0.19 | 4.5E-01 |
| rs1158219  | PRKD3   | 2   | 37400324  | A   | 393 | 1.09 | 0.15 | 5.4E-01 | A                        | 291 | 1.21 | 0.18 | 2.9E-01 | A             | 280 | 0.97 | 0.18 | 8.9E-01 |
| rs11587539 | PLA2G4A | 1   | 185181800 | T   | 394 | 1.19 | 0.15 | 2.6E-01 | T                        | 292 | 1.26 | 0.18 | 1.8E-01 | T             | 281 | 1.07 | 0.19 | 7.3E-01 |
| rs11594585 | CPN1    | 10  | 101801156 | G   | 392 | 0.81 | 0.15 | 1.6E-01 | G                        | 290 | 0.76 | 0.18 | 1.3E-01 | G             | 280 | 0.83 | 0.19 | 3.4E-01 |
| rs11597086 | CHUK    | 10  | 101943695 | C   | 392 | 0.85 | 0.15 | 2.8E-01 | C                        | 291 | 0.85 | 0.17 | 3.6E-01 | C             | 279 | 0.84 | 0.18 | 3.3E-01 |
| rs11599750 | CPN1    | 10  | 101795432 | T   | 394 | 0.85 | 0.14 | 2.6E-01 | T                        | 292 | 0.82 | 0.17 | 2.4E-01 | T             | 281 | 0.89 | 0.18 | 5.0E-01 |
| rs1160093  | GABRA4  | 4   | 46644527  | C   | 394 | 0.90 | 0.15 | 4.6E-01 | C                        | 292 | 0.73 | 0.19 | 9.3E-02 | C             | 281 | 1.07 | 0.18 | 7.3E-01 |
| rs1160198  | GLRA2   | 23  | 14568524  | A   | 394 | 0.65 | 0.47 | 3.7E-01 | A                        | 292 | 0.74 | 0.57 | 6.0E-01 | A             | 281 | 0.63 | 0.63 | 4.7E-01 |
| rs116119   | EPHB2   | 1   | 23091774  | T   | 394 | 0.95 | 0.14 | 7.2E-01 | T                        | 292 | 1.07 | 0.17 | 7.1E-01 | T             | 281 | 0.79 | 0.19 | 2.0E-01 |
| rs11625494 | BDKRB1  | 14  | 95792372  | A   | 394 | 0.83 | 0.44 | 6.6E-01 | A                        | 292 | 0.99 | 0.49 | 9.8E-01 | A             | 281 | 0.58 | 0.63 | 3.8E-01 |
| rs11630608 | MAP2K1  | 15  | 64532191  | C   | 392 | 0.91 | 0.15 | 5.3E-01 | C                        | 290 | 1.01 | 0.18 | 9.7E-01 | C             | 279 | 0.80 | 0.20 | 2.7E-01 |
| rs11641062 | GRIN2A  | 16  | 9990252   | G   | 394 | 0.90 | 0.14 | 4.4E-01 | G                        | 292 | 0.97 | 0.17 | 8.4E-01 | G             | 281 | 0.87 | 0.18 | 4.3E-01 |
| rs11656524 | HN1     | 17  | 70667982  | G   | 393 | 1.06 | 0.15 | 6.9E-01 | G                        | 291 | 1.00 | 0.19 | 9.9E-01 | G             | 280 | 1.14 | 0.19 | 4.7E-01 |
| rs11657055 | ACCN1   | 17  | 28474105  | A   | 394 | 0.91 | 0.14 | 4.8E-01 | A                        | 292 | 0.86 | 0.17 | 3.8E-01 | A             | 281 | 1.04 | 0.18 | 8.2E-01 |
| rs11662010 | GALR1   | 18  | 73090385  | G   | 391 | 0.94 | 0.15 | 6.5E-01 | G                        | 290 | 1.15 | 0.18 | 4.2E-01 | G             | 279 | 0.72 | 0.19 | 8.4E-02 |
| rs11688    | JUN     | 1   | 59020581  | T   | 394 | 1.38 | 0.31 | 2.9E-01 | T                        | 292 | 1.49 | 0.35 | 2.6E-01 | T             | 281 | 1.12 | 0.38 | 7.7E-01 |
| rs11690166 | KCNJ3   | 2   | 155264822 | G   | 394 | 1.15 | 0.14 | 3.5E-01 | G                        | 292 | 1.08 | 0.18 | 6.7E-01 | G             | 281 | 1.27 | 0.18 | 1.9E-01 |
| rs11692815 | PPP3R1  | 2   | 68269271  | A   | 394 | 0.95 | 0.14 | 7.2E-01 | A                        | 292 | 1.02 | 0.18 | 9.4E-01 | A             | 281 | 0.89 | 0.18 | 5.3E-01 |
| rs1169721  | P2RX4   | 12  | 120125892 | G   | 394 | 0.83 | 0.17 | 2.7E-01 | G                        | 292 | 0.91 | 0.21 | 6.4E-01 | G             | 281 | 0.75 | 0.23 | 2.1E-01 |
| rs11713100 | AIM     | 3   | 111513795 | C   | 394 | 1.28 | 0.23 | 3.0E-01 | C                        | 292 | 1.48 | 0.28 | 1.6E-01 | C             | 281 | 1.26 | 0.30 | 4.4E-01 |
| rs11716493 | SCN10A  | 3   | 38789887  | G   | 394 | 0.77 | 0.17 | 1.2E-01 | G                        | 292 | 0.76 | 0.21 | 1.8E-01 | G             | 281 | 0.78 | 0.20 | 2.1E-01 |
| rs11718446 | NFKBIZ  | 3   | 103035243 | A   | 393 | 1.39 | 0.16 | 4.2E-02 | A                        | 292 | 1.40 | 0.19 | 8.2E-02 | A             | 280 | 1.35 | 0.20 | 1.3E-01 |
| rs11720524 | SCN5A   | 3   | 38650416  | G   | 394 | 1.27 | 0.15 | 1.1E-01 | G                        | 292 | 1.43 | 0.18 | 4.4E-02 | G             | 281 | 1.09 | 0.19 | 6.4E-01 |
| rs11720592 | SLC6A11 | 3   | 10897420  | C   | 394 | 1.26 | 0.49 | 6.3E-01 | C                        | 292 | 1.38 | 0.55 | 5.6E-01 | C             | 281 | 1.01 | 0.63 | 9.9E-01 |
| rs11740792 | NR3C1   | 5   | 142727513 | G   | 388 | 1.82 | 0.20 | 2.9E-03 | G                        | 286 | 2.12 | 0.25 | 2.9E-03 | G             | 278 | 1.71 | 0.24 | 2.8E-02 |
| rs11741924 | GRIA1   | 5   | 153103056 | A   | 394 | 0.79 | 0.15 | 1.2E-01 | A                        | 292 | 0.75 | 0.18 | 1.2E-01 | A             | 281 | 0.80 | 0.19 | 2.3E-01 |
| rs11748343 | GDNF    | 5   | 37841699  | A   | 394 | 0.84 | 0.14 | 2.2E-01 | A                        | 292 | 0.75 | 0.18 | 1.1E-01 | A             | 281 | 0.96 | 0.18 | 8.0E-01 |
| rs11753634 | PACSIN1 | 6   | 34590245  | A   | 394 | 0.81 | 0.26 | 4.3E-01 | A                        | 292 | 0.86 | 0.32 | 6.4E-01 | A             | 281 | 0.66 | 0.35 | 2.4E-01 |
| rs1176713  | HTR3A   | 11  | 113365635 | G   | 394 | 1.05 | 0.19 | 7.8E-01 | G                        | 292 | 1.23 | 0.23 | 3.6E-01 | G             | 281 | 0.94 | 0.24 | 7.9E-01 |
| rs1176739  | HTR3B   | 11  | 113313027 | C   | 394 | 1.00 | 0.46 | 1.0E+00 | C                        | 292 | 0.39 | 0.79 | 2.3E-01 | C             | 281 | 1.87 | 0.50 | 2.1E-01 |
| rs1176744  | HTR3B   | 11  | 113308238 | C   | 394 | 1.04 | 0.16 | 8.1E-01 | C                        | 292 | 0.94 | 0.20 | 7.5E-01 | C             | 281 | 1.15 | 0.20 | 4.9E-01 |
| rs1176752  | HTR3A   | 11  | 113348687 | T   | 394 | 0.96 | 0.29 | 8.9E-01 | T                        | 292 | 0.75 | 0.38 | 4.5E-01 | T             | 281 | 1.19 | 0.34 | 6.2E-01 |
| rs1176761  | HTR3B   | 11  | 113318823 | A   | 393 | 0.99 | 0.46 | 9.9E-01 | A                        | 291 | 0.39 | 0.79 | 2.3E-01 | A             | 280 | 1.86 | 0.50 | 2.2E-01 |
| rs11795712 | GLRA2   | 23  | 14659262  | T   | 394 | 0.93 | 0.14 | 6.2E-01 | T                        | 292 | 0.81 | 0.18 | 2.4E-01 | T             | 281 | 1.07 | 0.18 | 7.2E-01 |
| rs11798698 | HTR2C   | 23  | 113803082 | T   | 394 | 1.26 | 0.15 | 1.3E-01 | T                        | 292 | 1.26 | 0.18 | 2.1E-01 | T             | 281 | 1.26 | 0.19 | 2.2E-01 |

| SNP        | GENE      | CHR | BP        | TMD |     |      |      |         | TMD with widespread pain |     |      |      |         | Localized TMD |     |      |      |         |
|------------|-----------|-----|-----------|-----|-----|------|------|---------|--------------------------|-----|------|------|---------|---------------|-----|------|------|---------|
|            |           |     |           | A1  | N   | OR   | SE   | P       | A1                       | N   | OR   | SE   | P       | A1            | N   | OR   | SE   | P       |
| rs11847020 | HIF1A     | 14  | 61229665  | G   | 393 | 1.20 | 0.36 | 6.1E-01 | G                        | 291 | 1.36 | 0.42 | 4.7E-01 | G             | 280 | 1.08 | 0.46 | 8.7E-01 |
| rs11861251 | ITGAM     | 16  | 31196897  | C   | 394 | 1.29 | 0.21 | 2.4E-01 | C                        | 292 | 0.97 | 0.26 | 9.1E-01 | C             | 281 | 1.50 | 0.25 | 1.1E-01 |
| rs11862589 | SLC6A2    | 16  | 54281443  | T   | 392 | 0.93 | 0.14 | 6.2E-01 | T                        | 290 | 0.99 | 0.17 | 9.3E-01 | T             | 280 | 0.88 | 0.18 | 4.7E-01 |
| rs1187323  | NTRK2     | 9   | 86473236  | C   | 388 | 1.06 | 0.19 | 7.5E-01 | C                        | 288 | 0.96 | 0.23 | 8.7E-01 | C             | 278 | 1.18 | 0.23 | 4.9E-01 |
| rs1187353  | NTRK2     | 9   | 86483073  | A   | 393 | 1.08 | 0.14 | 5.8E-01 | A                        | 291 | 1.04 | 0.17 | 8.2E-01 | A             | 281 | 1.16 | 0.17 | 3.9E-01 |
| rs11894144 | SCN3A     | 2   | 165742551 | T   | 394 | 1.16 | 0.14 | 2.7E-01 | T                        | 292 | 1.13 | 0.16 | 4.5E-01 | T             | 281 | 1.19 | 0.18 | 3.3E-01 |
| rs11896614 | PRKD3     | 2   | 37397048  | C   | 394 | 1.34 | 0.32 | 3.5E-01 | C                        | 292 | 1.05 | 0.40 | 9.0E-01 | C             | 281 | 1.53 | 0.37 | 2.4E-01 |
| rs11898177 | DBI       | 2   | 119851961 | C   | 393 | 0.80 | 0.15 | 1.4E-01 | C                        | 291 | 0.74 | 0.19 | 1.2E-01 | C             | 280 | 0.83 | 0.19 | 3.3E-01 |
| rs11913810 | KCTD17    | 22  | 35776992  | C   | 394 | 1.23 | 0.23 | 3.7E-01 | C                        | 292 | 1.26 | 0.26 | 3.9E-01 | C             | 281 | 1.19 | 0.28 | 5.4E-01 |
| rs11913984 | ADRBK2    | 22  | 24389030  | G   | 394 | 0.85 | 0.25 | 5.3E-01 | G                        | 292 | 0.52 | 0.37 | 8.2E-02 | G             | 281 | 1.13 | 0.29 | 6.7E-01 |
| rs11917883 | P2RY1     | 3   | 154042767 | G   | 394 | 0.74 | 0.35 | 3.9E-01 | G                        | 292 | 0.66 | 0.45 | 3.6E-01 | G             | 281 | 0.84 | 0.44 | 6.9E-01 |
| rs11919589 | SCN11A    | 3   | 38910196  | G   | 393 | 1.20 | 0.17 | 2.9E-01 | G                        | 291 | 1.24 | 0.20 | 2.9E-01 | G             | 281 | 1.16 | 0.22 | 5.1E-01 |
| rs11926158 | SCN10A    | 3   | 38798319  | C   | 394 | 1.00 | 0.15 | 1.0E+00 | C                        | 292 | 1.25 | 0.19 | 2.4E-01 | C             | 281 | 0.84 | 0.20 | 3.7E-01 |
| rs11937985 | MAP2K1IP1 | 4   | 101027932 | T   | 394 | 1.02 | 0.18 | 9.3E-01 | T                        | 292 | 1.14 | 0.22 | 5.4E-01 | T             | 281 | 0.87 | 0.23 | 5.4E-01 |
| rs11938826 | FGF2      | 4   | 123992064 | G   | 394 | 0.82 | 0.20 | 3.3E-01 | G                        | 292 | 0.64 | 0.25 | 7.9E-02 | G             | 281 | 1.01 | 0.24 | 9.5E-01 |
| rs11941278 | HNRNPD    | 4   | 83488451  | C   | 394 | 1.25 | 0.16 | 1.6E-01 | C                        | 292 | 1.21 | 0.19 | 3.2E-01 | C             | 281 | 1.26 | 0.19 | 2.4E-01 |
| rs11944405 | MAP2K1IP1 | 4   | 101018984 | C   | 394 | 1.02 | 0.18 | 9.3E-01 | C                        | 292 | 1.14 | 0.22 | 5.4E-01 | C             | 281 | 0.87 | 0.23 | 5.4E-01 |
| rs11945868 | GLRB      | 4   | 158294266 | C   | 394 | 0.33 | 0.49 | 2.4E-02 | C                        | 292 | 0.30 | 0.64 | 5.9E-02 | C             | 281 | 0.34 | 0.64 | 8.8E-02 |
| rs1195474  | ATF3      | 1   | 210804825 | T   | 390 | 0.92 | 0.15 | 5.9E-01 | T                        | 289 | 1.04 | 0.18 | 8.3E-01 | T             | 277 | 0.79 | 0.19 | 2.2E-01 |
| rs11965773 | TAAR8     | 6   | 132914051 | C   | 393 | 1.54 | 0.21 | 3.7E-02 | C                        | 291 | 1.43 | 0.25 | 1.6E-01 | C             | 280 | 1.91 | 0.25 | 1.0E-02 |
| rs11968252 | TAAR2     | 6   | 132984411 | T   | 394 | 0.94 | 0.17 | 7.3E-01 | T                        | 292 | 0.86 | 0.21 | 4.8E-01 | T             | 281 | 1.06 | 0.21 | 7.8E-01 |
| rs1197669  | PLA2G4B   | 15  | 39925748  | A   | 394 | 1.13 | 0.15 | 4.2E-01 | A                        | 292 | 1.22 | 0.18 | 2.7E-01 | A             | 281 | 1.03 | 0.19 | 8.9E-01 |
| rs11978472 | CACNA2D1  | 7   | 81677489  | C   | 388 | 1.15 | 0.14 | 3.3E-01 | C                        | 287 | 1.21 | 0.17 | 2.7E-01 | C             | 276 | 1.13 | 0.18 | 5.0E-01 |
| rs11984    | PRKD1     | 14  | 29115729  | C   | 394 | 1.09 | 0.14 | 5.6E-01 | C                        | 292 | 1.44 | 0.17 | 3.6E-02 | C             | 281 | 0.79 | 0.19 | 2.2E-01 |
| rs11986055 | IKBKB     | 8   | 42254335  | C   | 394 | 0.55 | 0.39 | 1.3E-01 | C                        | 292 | 0.45 | 0.52 | 1.2E-01 | C             | 281 | 0.61 | 0.49 | 3.2E-01 |
| rs1200428  | RUNX2     | 6   | 45626180  | T   | 394 | 1.16 | 0.16 | 3.7E-01 | T                        | 292 | 1.17 | 0.20 | 4.4E-01 | T             | 281 | 1.16 | 0.21 | 4.8E-01 |
| rs12026099 | PTGER3    | 1   | 71115803  | A   | 392 | 0.57 | 0.49 | 2.5E-01 | A                        | 290 | 0.90 | 0.52 | 8.4E-01 | A             | 280 | 0.16 | 1.05 | 7.9E-02 |
| rs12050736 | MAP2K1    | 15  | 64537705  | C   | 394 | 1.17 | 0.28 | 5.7E-01 | C                        | 292 | 1.37 | 0.32 | 3.3E-01 | C             | 281 | 0.84 | 0.37 | 6.5E-01 |
| rs12058927 | NGF       | 1   | 115647744 | T   | 394 | 1.07 | 0.19 | 7.1E-01 | T                        | 292 | 1.16 | 0.22 | 5.0E-01 | T             | 281 | 0.90 | 0.24 | 6.7E-01 |
| rs12068974 | HNRNPU    | 1   | 243089613 | C   | 394 | 0.92 | 0.20 | 6.9E-01 | C                        | 292 | 0.92 | 0.24 | 7.2E-01 | C             | 281 | 0.95 | 0.25 | 8.4E-01 |
| rs1206920  | AIM       | 6   | 9867494   | G   | 392 | 0.78 | 0.15 | 9.1E-02 | G                        | 290 | 0.86 | 0.18 | 4.2E-01 | G             | 280 | 0.72 | 0.19 | 8.5E-02 |
| rs12085417 | BTG2      | 1   | 201543676 | A   | 394 | 1.87 | 0.36 | 8.4E-02 | A                        | 292 | 1.92 | 0.41 | 1.1E-01 | A             | 281 | 1.62 | 0.44 | 2.7E-01 |
| rs12108750 | CSNK1A1   | 5   | 148893811 | A   | 394 | 1.06 | 0.17 | 7.3E-01 | A                        | 292 | 0.82 | 0.22 | 3.5E-01 | A             | 281 | 1.30 | 0.21 | 2.1E-01 |
| rs1211166  | NTRK2     | 9   | 86475812  | G   | 394 | 1.07 | 0.18 | 7.1E-01 | G                        | 292 | 1.00 | 0.23 | 1.0E+00 | G             | 281 | 1.15 | 0.23 | 5.4E-01 |
| rs12117581 | RUNX3     | 1   | 25145396  | A   | 394 | 0.65 | 0.42 | 3.1E-01 | A                        | 292 | 0.78 | 0.48 | 6.1E-01 | A             | 281 | 0.45 | 0.63 | 2.0E-01 |
| rs12118235 | KCNK2     | 1   | 213415404 | A   | 389 | 1.07 | 0.34 | 8.5E-01 | A                        | 288 | 1.06 | 0.40 | 8.8E-01 | A             | 278 | 0.95 | 0.43 | 9.1E-01 |
| rs12125484 | AIM       | 1   | 92584784  | G   | 394 | 1.06 | 0.15 | 7.0E-01 | G                        | 292 | 1.00 | 0.19 | 9.9E-01 | G             | 281 | 1.09 | 0.20 | 6.8E-01 |
| rs12125857 | PLA2G4A   | 1   | 185196174 | T   | 394 | 0.78 | 0.16 | 1.2E-01 | T                        | 292 | 0.77 | 0.20 | 2.0E-01 | T             | 281 | 0.73 | 0.21 | 1.4E-01 |
| rs1213266  | PTGS1     | 9   | 124176705 | A   | 388 | 0.46 | 0.28 | 6.8E-03 | A                        | 287 | 0.28 | 0.45 | 4.1E-03 | A             | 277 | 0.72 | 0.32 | 3.2E-01 |

| SNP        | GENE     | CHR | BP        | TMD |     |      |      |         | TMD with widespread pain |     |      |      |         | Localized TMD |     |      |      |         |
|------------|----------|-----|-----------|-----|-----|------|------|---------|--------------------------|-----|------|------|---------|---------------|-----|------|------|---------|
|            |          |     |           | A1  | N   | OR   | SE   | P       | A1                       | N   | OR   | SE   | P       | A1            | N   | OR   | SE   | P       |
| rs12142663 | ADORA3   | 1   | 111857096 | G   | 393 | 0.81 | 0.16 | 1.8E-01 | G                        | 292 | 0.77 | 0.20 | 1.9E-01 | G             | 280 | 0.80 | 0.20 | 2.6E-01 |
| rs12145540 | NTRK1    | 1   | 155084568 | A   | 394 | 1.68 | 0.30 | 8.3E-02 | A                        | 292 | 1.76 | 0.35 | 1.1E-01 | A             | 281 | 1.45 | 0.36 | 3.0E-01 |
| rs12153765 | GRIA1    | 5   | 152928447 | A   | 394 | 1.03 | 0.25 | 9.0E-01 | A                        | 292 | 1.33 | 0.29 | 3.2E-01 | A             | 281 | 0.67 | 0.37 | 2.7E-01 |
| rs12154178 | ESR1     | 6   | 152292773 | C   | 393 | 0.93 | 0.16 | 6.6E-01 | C                        | 291 | 0.82 | 0.19 | 3.0E-01 | C             | 280 | 1.05 | 0.19 | 8.1E-01 |
| rs12163992 | CSNK1A1  | 5   | 148889270 | A   | 393 | 1.07 | 0.17 | 6.9E-01 | A                        | 291 | 0.82 | 0.22 | 3.7E-01 | A             | 280 | 1.31 | 0.21 | 1.9E-01 |
| rs12172554 | MAPK1    | 22  | 20525075  | T   | 392 | 1.22 | 0.36 | 5.9E-01 | T                        | 290 | 1.04 | 0.44 | 9.3E-01 | T             | 280 | 1.32 | 0.45 | 5.3E-01 |
| rs12201555 | RUNX2    | 6   | 45402378  | A   | 394 | 0.64 | 0.16 | 4.6E-03 | A                        | 292 | 0.56 | 0.20 | 3.7E-03 | A             | 281 | 0.71 | 0.19 | 7.5E-02 |
| rs12205523 | RUNX2    | 6   | 45404596  | C   | 393 | 0.63 | 0.16 | 3.9E-03 | C                        | 291 | 0.55 | 0.20 | 3.2E-03 | C             | 280 | 0.70 | 0.19 | 6.8E-02 |
| rs12205732 | OPRM1    | 6   | 154400626 | A   | 394 | 0.60 | 0.35 | 1.4E-01 | A                        | 292 | 0.40 | 0.50 | 7.0E-02 | A             | 281 | 0.74 | 0.41 | 4.6E-01 |
| rs12209785 | RUNX2    | 6   | 45614100  | G   | 394 | 1.28 | 0.16 | 1.2E-01 | G                        | 292 | 1.28 | 0.19 | 1.9E-01 | G             | 281 | 1.32 | 0.20 | 1.7E-01 |
| rs12238250 | GRIN1    | 9   | 139166503 | C   | 390 | 1.10 | 0.26 | 7.3E-01 | C                        | 288 | 0.99 | 0.32 | 9.8E-01 | C             | 278 | 1.18 | 0.32 | 6.0E-01 |
| rs12251292 | CHUK     | 10  | 101981538 | C   | 394 | 1.63 | 0.58 | 4.0E-01 | C                        | 292 | 2.24 | 0.62 | 1.9E-01 | C             | 281 | 0.80 | 0.85 | 8.0E-01 |
| rs12255069 | PRKG1    | 10  | 53725967  | T   | 394 | 1.04 | 0.28 | 8.9E-01 | T                        | 292 | 1.24 | 0.32 | 5.0E-01 | T             | 281 | 0.80 | 0.39 | 5.6E-01 |
| rs12258    | VPS4A    | 16  | 67916417  | A   | 393 | 1.63 | 0.30 | 1.1E-01 | A                        | 291 | 1.56 | 0.36 | 2.2E-01 | A             | 281 | 1.88 | 0.36 | 7.9E-02 |
| rs12267384 | PRKG1    | 10  | 53562727  | G   | 392 | 1.04 | 0.29 | 8.9E-01 | G                        | 290 | 0.81 | 0.39 | 5.9E-01 | G             | 280 | 1.27 | 0.34 | 4.8E-01 |
| rs12273363 | BDNF     | 11  | 27701435  | C   | 394 | 1.40 | 0.18 | 6.2E-02 | C                        | 292 | 1.26 | 0.22 | 2.9E-01 | C             | 281 | 1.66 | 0.22 | 2.0E-02 |
| rs12274033 | ARRB1    | 11  | 74741703  | C   | 393 | 0.85 | 0.29 | 5.7E-01 | C                        | 291 | 1.00 | 0.36 | 9.9E-01 | C             | 281 | 0.92 | 0.38 | 8.2E-01 |
| rs1227647  | AIM      | 8   | 80291691  | G   | 394 | 1.24 | 0.17 | 2.1E-01 | G                        | 292 | 1.22 | 0.20 | 3.2E-01 | G             | 281 | 1.22 | 0.21 | 3.5E-01 |
| rs1229434  | TAC1     | 7   | 97203778  | C   | 393 | 0.94 | 0.14 | 6.7E-01 | C                        | 291 | 1.10 | 0.18 | 6.1E-01 | C             | 280 | 0.82 | 0.18 | 2.6E-01 |
| rs1229502  | CACNA2D1 | 7   | 81426572  | A   | 394 | 1.11 | 0.16 | 5.2E-01 | A                        | 292 | 1.05 | 0.19 | 8.2E-01 | A             | 281 | 1.15 | 0.20 | 5.0E-01 |
| rs1229506  | CACNA2D1 | 7   | 81439970  | G   | 390 | 0.91 | 0.14 | 5.1E-01 | G                        | 288 | 0.89 | 0.16 | 4.9E-01 | G             | 278 | 0.91 | 0.18 | 6.0E-01 |
| rs12313915 | AIM      | 12  | 83786783  | T   | 394 | 1.24 | 0.15 | 1.6E-01 | T                        | 292 | 1.67 | 0.18 | 5.1E-03 | T             | 281 | 0.94 | 0.19 | 7.6E-01 |
| rs1236913  | PTGS1    | 9   | 124173300 | T   | 393 | 0.66 | 0.28 | 1.4E-01 | T                        | 292 | 0.55 | 0.38 | 1.1E-01 | T             | 280 | 0.88 | 0.34 | 7.1E-01 |
| rs12411052 | KCNA2    | 1   | 110960053 | G   | 394 | 0.71 | 0.28 | 2.1E-01 | G                        | 292 | 0.89 | 0.32 | 7.1E-01 | G             | 281 | 0.44 | 0.41 | 4.6E-02 |
| rs12415832 | GRK5     | 10  | 121102317 | A   | 394 | 1.78 | 0.64 | 3.7E-01 | A                        | 292 | 0.45 | 1.13 | 4.7E-01 | A             | 281 | 3.17 | 0.66 | 8.0E-02 |
| rs12421796 | GRIA4    | 11  | 105028171 | C   | 394 | 1.18 | 0.15 | 2.9E-01 | C                        | 292 | 1.10 | 0.19 | 6.0E-01 | C             | 281 | 1.23 | 0.19 | 2.8E-01 |
| rs12424271 | SCN8A    | 12  | 50301235  | A   | 394 | 1.05 | 0.21 | 8.3E-01 | A                        | 292 | 1.02 | 0.27 | 9.5E-01 | A             | 281 | 1.06 | 0.27 | 8.2E-01 |
| rs12439516 | MAP2K1   | 15  | 64490530  | T   | 394 | 0.65 | 0.24 | 7.4E-02 | T                        | 292 | 0.77 | 0.29 | 3.6E-01 | T             | 281 | 0.51 | 0.33 | 4.5E-02 |
| rs12440176 | MAP2K1   | 15  | 64501432  | G   | 394 | 0.65 | 0.24 | 7.4E-02 | G                        | 292 | 0.77 | 0.29 | 3.6E-01 | G             | 281 | 0.51 | 0.33 | 4.5E-02 |
| rs12451328 | ACE      | 17  | 58950280  | A   | 386 | 0.92 | 0.15 | 5.6E-01 | A                        | 286 | 0.99 | 0.18 | 9.6E-01 | A             | 275 | 0.83 | 0.18 | 3.2E-01 |
| rs12464239 | ERBB4    | 2   | 212605149 | T   | 394 | 0.94 | 0.24 | 8.1E-01 | T                        | 292 | 0.72 | 0.31 | 2.9E-01 | T             | 281 | 1.17 | 0.29 | 5.9E-01 |
| rs12469968 | DPP4     | 2   | 162632163 | G   | 386 | 1.12 | 0.14 | 4.3E-01 | G                        | 288 | 1.02 | 0.18 | 9.3E-01 | G             | 276 | 1.22 | 0.18 | 2.6E-01 |
| rs12471749 | KCNJ3    | 2   | 155267957 | C   | 393 | 1.18 | 0.15 | 2.7E-01 | C                        | 291 | 1.14 | 0.18 | 4.6E-01 | C             | 280 | 1.23 | 0.18 | 2.7E-01 |
| rs12489076 | EPHB3    | 3   | 185761706 | G   | 394 | 0.92 | 0.21 | 6.7E-01 | G                        | 292 | 0.89 | 0.26 | 6.6E-01 | G             | 281 | 1.01 | 0.26 | 9.6E-01 |
| rs12503643 | ACSL1    | 4   | 185983082 | T   | 394 | 0.86 | 0.15 | 3.3E-01 | T                        | 292 | 0.72 | 0.19 | 8.6E-02 | T             | 281 | 1.07 | 0.18 | 7.3E-01 |
| rs12507653 | NPY1R    | 4   | 164473783 | T   | 380 | 1.07 | 0.15 | 6.6E-01 | T                        | 280 | 1.08 | 0.18 | 6.5E-01 | T             | 269 | 1.05 | 0.18 | 7.9E-01 |
| rs12521436 | NR3C1    | 5   | 142797800 | A   | 394 | 0.84 | 0.19 | 3.4E-01 | A                        | 292 | 0.99 | 0.22 | 9.8E-01 | A             | 281 | 0.73 | 0.25 | 2.0E-01 |
| rs12532490 | TAC1     | 7   | 97207327  | C   | 393 | 1.04 | 0.19 | 8.2E-01 | C                        | 291 | 1.04 | 0.23 | 8.7E-01 | C             | 281 | 1.09 | 0.24 | 7.1E-01 |
| rs12538371 | EGFR     | 7   | 55203514  | C   | 394 | 1.42 | 0.22 | 1.1E-01 | C                        | 292 | 1.86 | 0.26 | 1.7E-02 | C             | 281 | 1.13 | 0.29 | 6.7E-01 |

| SNP        | GENE    | CHR | BP        | TMD |     |      |      |         | TMD with widespread pain |     |      |      |         | Localized TMD |     |      |      |         |
|------------|---------|-----|-----------|-----|-----|------|------|---------|--------------------------|-----|------|------|---------|---------------|-----|------|------|---------|
|            |         |     |           | A1  | N   | OR   | SE   | P       | A1                       | N   | OR   | SE   | P       | A1            | N   | OR   | SE   | P       |
| rs1254594  | PTGER2  | 14  | 51857788  | C   | 394 | 1.13 | 0.22 | 5.8E-01 | C                        | 292 | 1.13 | 0.27 | 6.6E-01 | C             | 281 | 1.27 | 0.27 | 3.8E-01 |
| rs1254600  | PTGER2  | 14  | 51850203  | A   | 394 | 1.15 | 0.19 | 4.5E-01 | A                        | 292 | 1.20 | 0.22 | 4.3E-01 | A             | 281 | 1.18 | 0.24 | 4.9E-01 |
| rs12559450 | GRIA3   | 23  | 122153524 | A   | 394 | 1.11 | 0.15 | 4.7E-01 | A                        | 292 | 1.08 | 0.18 | 6.5E-01 | A             | 281 | 1.16 | 0.18 | 4.2E-01 |
| rs1256030  | ESR2    | 14  | 63816923  | A   | 394 | 1.10 | 0.14 | 4.9E-01 | A                        | 292 | 0.91 | 0.17 | 5.9E-01 | A             | 281 | 1.27 | 0.17 | 1.5E-01 |
| rs1256044  | ESR2    | 14  | 63803780  | G   | 393 | 1.11 | 0.14 | 4.5E-01 | G                        | 291 | 0.95 | 0.17 | 7.4E-01 | G             | 281 | 1.27 | 0.17 | 1.6E-01 |
| rs1256061  | ESR2    | 14  | 63773346  | T   | 394 | 0.97 | 0.14 | 8.4E-01 | T                        | 292 | 1.11 | 0.17 | 5.4E-01 | T             | 281 | 0.87 | 0.17 | 4.2E-01 |
| rs1256120  | ESR2    | 14  | 63874754  | G   | 394 | 0.74 | 0.22 | 1.6E-01 | G                        | 292 | 0.69 | 0.27 | 1.7E-01 | G             | 281 | 0.78 | 0.27 | 3.6E-01 |
| rs12595448 | AIM     | 15  | 53691382  | C   | 394 | 1.09 | 0.15 | 5.9E-01 | C                        | 292 | 1.02 | 0.19 | 9.2E-01 | C             | 281 | 1.24 | 0.19 | 2.6E-01 |
| rs12598139 | GRIN2A  | 16  | 9774091   | T   | 394 | 0.85 | 0.14 | 2.4E-01 | T                        | 292 | 0.84 | 0.17 | 2.9E-01 | T             | 281 | 0.86 | 0.18 | 4.0E-01 |
| rs12612207 | NTSR2   | 2   | 11724667  | C   | 394 | 0.90 | 0.14 | 4.8E-01 | C                        | 292 | 0.94 | 0.18 | 7.4E-01 | C             | 281 | 0.95 | 0.18 | 7.6E-01 |
| rs12613135 | DBI     | 2   | 119838810 | C   | 394 | 0.80 | 0.15 | 1.5E-01 | C                        | 292 | 0.74 | 0.19 | 1.3E-01 | C             | 281 | 0.84 | 0.19 | 3.5E-01 |
| rs12618959 | AIM     | 2   | 33017154  | A   | 394 | 0.94 | 0.15 | 7.0E-01 | A                        | 292 | 1.00 | 0.19 | 9.9E-01 | A             | 281 | 0.90 | 0.19 | 5.7E-01 |
| rs12619626 | SCN2A   | 2   | 165856992 | G   | 394 | 0.90 | 0.16 | 5.1E-01 | G                        | 292 | 1.12 | 0.20 | 5.7E-01 | G             | 281 | 0.71 | 0.22 | 1.2E-01 |
| rs12627968 | ADRBK2  | 22  | 24456015  | C   | 394 | 0.85 | 0.15 | 2.5E-01 | C                        | 292 | 0.75 | 0.18 | 1.1E-01 | C             | 281 | 0.96 | 0.18 | 8.4E-01 |
| rs12632942 | SCN10A  | 3   | 38740002  | G   | 393 | 1.12 | 0.17 | 5.2E-01 | G                        | 291 | 1.22 | 0.21 | 3.3E-01 | G             | 280 | 1.04 | 0.21 | 8.6E-01 |
| rs12635515 | MME     | 3   | 156334521 | G   | 394 | 1.01 | 0.15 | 9.4E-01 | G                        | 292 | 0.95 | 0.18 | 7.6E-01 | G             | 281 | 1.09 | 0.19 | 6.4E-01 |
| rs12642938 | UGT2B7  | 4   | 70010806  | C   | 394 | 0.96 | 0.14 | 7.7E-01 | C                        | 292 | 0.94 | 0.18 | 7.1E-01 | C             | 281 | 1.02 | 0.18 | 9.1E-01 |
| rs12644851 | AIM     | 4   | 159827612 | A   | 394 | 0.97 | 0.14 | 8.3E-01 | A                        | 292 | 1.05 | 0.17 | 7.7E-01 | A             | 281 | 0.92 | 0.17 | 6.4E-01 |
| rs12658202 | GRIA1   | 5   | 152959747 | C   | 394 | 0.92 | 0.14 | 5.7E-01 | C                        | 292 | 0.97 | 0.18 | 8.6E-01 | C             | 281 | 0.90 | 0.18 | 5.5E-01 |
| rs12660296 | OPRM1   | 6   | 154502966 | C   | 394 | 1.04 | 0.17 | 8.0E-01 | C                        | 292 | 1.13 | 0.20 | 5.3E-01 | C             | 281 | 0.90 | 0.21 | 6.2E-01 |
| rs12666409 | DDC     | 7   | 50602470  | A   | 393 | 1.16 | 0.17 | 3.8E-01 | A                        | 291 | 1.35 | 0.20 | 1.3E-01 | A             | 280 | 0.98 | 0.21 | 9.1E-01 |
| rs12668047 | AKR1B10 | 7   | 133915366 | A   | 394 | 1.17 | 0.57 | 7.8E-01 | A                        | 292 | 1.85 | 0.64 | 3.4E-01 | A             | 281 | 0.80 | 0.85 | 8.0E-01 |
| rs12674036 | EGFR    | 7   | 55050856  | T   | 394 | 0.76 | 0.16 | 8.4E-02 | T                        | 292 | 0.64 | 0.20 | 2.9E-02 | T             | 281 | 0.90 | 0.20 | 6.1E-01 |
| rs12678324 | AIM     | 8   | 16833064  | T   | 393 | 0.90 | 0.22 | 6.4E-01 | T                        | 291 | 0.89 | 0.28 | 6.7E-01 | T             | 280 | 1.01 | 0.28 | 9.8E-01 |
| rs12680126 | STAU2   | 8   | 74638998  | A   | 394 | 1.09 | 0.21 | 6.7E-01 | A                        | 292 | 1.28 | 0.25 | 3.2E-01 | A             | 281 | 0.85 | 0.28 | 5.5E-01 |
| rs12702072 | CAMK2B  | 7   | 44269554  | G   | 394 | 0.80 | 0.15 | 1.4E-01 | G                        | 292 | 0.86 | 0.18 | 4.2E-01 | G             | 281 | 0.70 | 0.19 | 6.3E-02 |
| rs12702079 | CAMK2B  | 7   | 44323312  | A   | 394 | 1.32 | 0.14 | 5.1E-02 | A                        | 292 | 1.31 | 0.17 | 1.1E-01 | A             | 281 | 1.37 | 0.18 | 7.3E-02 |
| rs12710567 | AGTR2   | 23  | 115215880 | C   | 394 | 1.29 | 0.36 | 4.8E-01 | C                        | 292 | 1.59 | 0.43 | 2.8E-01 | C             | 281 | 1.09 | 0.46 | 8.6E-01 |
| rs12718939 | EGFR    | 7   | 55072814  | A   | 390 | 1.01 | 0.16 | 9.6E-01 | A                        | 288 | 1.00 | 0.19 | 9.9E-01 | A             | 278 | 1.09 | 0.20 | 6.8E-01 |
| rs12720071 | CNR1    | 6   | 88907900  | C   | 394 | 0.64 | 0.26 | 8.1E-02 | C                        | 292 | 0.63 | 0.32 | 1.5E-01 | C             | 281 | 0.70 | 0.33 | 2.7E-01 |
| rs12720707 | PLA2G4A | 1   | 185224619 | A   | 394 | 1.04 | 0.29 | 8.9E-01 | A                        | 292 | 1.04 | 0.34 | 9.1E-01 | A             | 281 | 0.93 | 0.36 | 8.4E-01 |
| rs12732926 | EPHB2   | 1   | 22929777  | A   | 392 | 1.02 | 0.15 | 8.8E-01 | A                        | 290 | 0.90 | 0.18 | 5.4E-01 | A             | 280 | 1.19 | 0.19 | 3.6E-01 |
| rs12736    | ATP6V1A | 3   | 115012901 | C   | 394 | 1.18 | 0.15 | 2.8E-01 | C                        | 292 | 1.30 | 0.19 | 1.6E-01 | C             | 281 | 1.14 | 0.19 | 5.0E-01 |
| rs12744240 | ADORA1  | 1   | 201402297 | T   | 394 | 0.75 | 0.31 | 3.6E-01 | T                        | 292 | 0.99 | 0.35 | 9.7E-01 | T             | 281 | 0.47 | 0.49 | 1.3E-01 |
| rs12762869 | CHUK    | 10  | 101983702 | A   | 394 | 0.80 | 0.39 | 5.7E-01 | A                        | 292 | 0.53 | 0.56 | 2.6E-01 | A             | 281 | 1.15 | 0.44 | 7.5E-01 |
| rs12765    | MME     | 3   | 156383384 | G   | 394 | 0.95 | 0.15 | 7.1E-01 | G                        | 292 | 1.05 | 0.19 | 8.1E-01 | G             | 281 | 0.93 | 0.20 | 7.0E-01 |
| rs12775433 | CPN1    | 10  | 101824082 | T   | 394 | 0.74 | 0.15 | 3.8E-02 | T                        | 292 | 0.73 | 0.18 | 6.9E-02 | T             | 281 | 0.76 | 0.18 | 1.3E-01 |
| rs12780837 | GRK5    | 10  | 121140883 | A   | 389 | 1.02 | 0.16 | 9.2E-01 | A                        | 289 | 1.04 | 0.19 | 8.3E-01 | A             | 276 | 0.97 | 0.21 | 9.0E-01 |
| rs12787775 | P2RY6   | 11  | 72652865  | T   | 392 | 0.99 | 0.19 | 9.7E-01 | T                        | 291 | 1.19 | 0.24 | 4.7E-01 | T             | 280 | 0.96 | 0.26 | 8.8E-01 |

| SNP        | GENE    | CHR | BP        | TMD |     |      |      |         | TMD with widespread pain |     |      |      |         | Localized TMD |     |      |      |         |
|------------|---------|-----|-----------|-----|-----|------|------|---------|--------------------------|-----|------|------|---------|---------------|-----|------|------|---------|
|            |         |     |           | A1  | N   | OR   | SE   | P       | A1                       | N   | OR   | SE   | P       | A1            | N   | OR   | SE   | P       |
| rs12807961 | CAT     | 11  | 34412684  | G   | 393 | 0.94 | 0.15 | 6.9E-01 | G                        | 291 | 0.92 | 0.19 | 6.4E-01 | G             | 281 | 0.99 | 0.19 | 9.7E-01 |
| rs12821878 | IGF1    | 12  | 101391797 | A   | 394 | 0.90 | 0.18 | 5.4E-01 | A                        | 292 | 0.84 | 0.22 | 4.2E-01 | A             | 281 | 0.97 | 0.22 | 8.7E-01 |
| rs12838742 | HTR2C   | 23  | 113759467 | C   | 394 | 1.27 | 0.15 | 1.1E-01 | C                        | 292 | 1.29 | 0.18 | 1.7E-01 | C             | 281 | 1.26 | 0.19 | 2.2E-01 |
| rs12848910 | CYBB    | 23  | 37551189  | G   | 393 | 0.87 | 0.26 | 5.8E-01 | G                        | 291 | 0.97 | 0.32 | 9.3E-01 | G             | 280 | 0.72 | 0.35 | 3.4E-01 |
| rs1286813  | INADL   | 1   | 62061661  | G   | 394 | 1.07 | 0.15 | 6.5E-01 | G                        | 292 | 0.95 | 0.19 | 7.8E-01 | G             | 281 | 1.29 | 0.18 | 1.7E-01 |
| rs1286823  | INADL   | 1   | 62029624  | C   | 394 | 1.34 | 0.21 | 1.7E-01 | C                        | 292 | 1.12 | 0.27 | 6.9E-01 | C             | 281 | 1.58 | 0.25 | 6.7E-02 |
| rs1286831  | INADL   | 1   | 62044550  | A   | 394 | 1.00 | 0.18 | 1.0E+00 | A                        | 292 | 0.89 | 0.23 | 6.1E-01 | A             | 281 | 1.14 | 0.22 | 5.6E-01 |
| rs12910925 | GABRB3  | 15  | 24767181  | T   | 390 | 0.94 | 0.14 | 6.6E-01 | T                        | 289 | 1.03 | 0.17 | 8.6E-01 | T             | 279 | 0.78 | 0.18 | 1.8E-01 |
| rs12936240 | TRPV2   | 17  | 16271644  | T   | 392 | 0.89 | 0.16 | 4.4E-01 | T                        | 290 | 0.87 | 0.20 | 4.7E-01 | T             | 281 | 0.94 | 0.19 | 7.6E-01 |
| rs12936511 | CRHR1   | 17  | 41240182  | T   | 394 | 1.19 | 0.34 | 6.1E-01 | T                        | 292 | 0.91 | 0.44 | 8.4E-01 | T             | 281 | 1.54 | 0.39 | 2.7E-01 |
| rs1294094  | OPRM1   | 6   | 154372498 | A   | 390 | 0.74 | 0.14 | 3.6E-02 | A                        | 289 | 0.79 | 0.17 | 1.6E-01 | A             | 277 | 0.69 | 0.18 | 4.2E-02 |
| rs12942300 | CRHR1   | 17  | 41215168  | A   | 393 | 0.95 | 0.20 | 7.9E-01 | A                        | 291 | 1.03 | 0.24 | 9.1E-01 | A             | 281 | 0.95 | 0.26 | 8.4E-01 |
| rs1295683  | IL13    | 5   | 132026775 | A   | 390 | 0.79 | 0.22 | 2.8E-01 | A                        | 289 | 0.76 | 0.27 | 3.1E-01 | A             | 278 | 0.80 | 0.28 | 4.4E-01 |
| rs1295686  | IL13    | 5   | 132023742 | T   | 393 | 0.88 | 0.17 | 4.4E-01 | T                        | 291 | 0.94 | 0.21 | 7.4E-01 | T             | 280 | 0.87 | 0.21 | 5.1E-01 |
| rs12993173 | SCN2A   | 2   | 165891460 | G   | 394 | 0.98 | 0.14 | 8.9E-01 | G                        | 292 | 1.20 | 0.17 | 2.9E-01 | G             | 281 | 0.83 | 0.18 | 2.8E-01 |
| rs12995889 | ERBB4   | 2   | 212759008 | G   | 384 | 0.80 | 0.30 | 4.6E-01 | G                        | 285 | 0.78 | 0.38 | 5.1E-01 | G             | 273 | 0.88 | 0.38 | 7.5E-01 |
| rs130058   | HTR1B   | 6   | 78230000  | A   | 394 | 0.87 | 0.15 | 3.6E-01 | A                        | 292 | 0.73 | 0.19 | 1.0E-01 | A             | 281 | 1.00 | 0.19 | 9.9E-01 |
| rs13011371 | SCN3A   | 2   | 165720877 | G   | 394 | 0.83 | 0.15 | 2.2E-01 | G                        | 292 | 0.75 | 0.18 | 1.1E-01 | G             | 281 | 0.94 | 0.18 | 7.4E-01 |
| rs13025009 | SCN2A   | 2   | 165878319 | G   | 394 | 1.13 | 0.18 | 4.8E-01 | G                        | 292 | 0.91 | 0.22 | 6.8E-01 | G             | 281 | 1.28 | 0.21 | 2.5E-01 |
| rs13029910 | PPP3R1  | 2   | 68287849  | C   | 394 | 0.95 | 0.17 | 7.4E-01 | C                        | 292 | 0.95 | 0.20 | 8.1E-01 | C             | 281 | 0.93 | 0.21 | 7.2E-01 |
| rs13035133 | ERBB4   | 2   | 212363062 | C   | 393 | 0.94 | 0.15 | 7.0E-01 | C                        | 291 | 0.80 | 0.19 | 2.3E-01 | C             | 281 | 1.13 | 0.18 | 5.1E-01 |
| rs13054361 | CSNK1E  | 22  | 37062770  | A   | 394 | 1.07 | 0.25 | 8.0E-01 | A                        | 292 | 1.03 | 0.31 | 9.4E-01 | A             | 281 | 1.15 | 0.31 | 6.5E-01 |
| rs130654   | PDGFB   | 22  | 37972600  | G   | 394 | 1.11 | 0.15 | 4.9E-01 | G                        | 292 | 1.07 | 0.19 | 7.1E-01 | G             | 281 | 1.16 | 0.19 | 4.4E-01 |
| rs13065862 | GRK7    | 3   | 143001558 | A   | 394 | 1.58 | 0.21 | 3.2E-02 | A                        | 292 | 1.42 | 0.25 | 1.7E-01 | A             | 281 | 1.74 | 0.25 | 2.9E-02 |
| rs13107066 | GABRB1  | 4   | 47073452  | G   | 394 | 0.99 | 0.14 | 9.4E-01 | G                        | 292 | 1.12 | 0.17 | 5.1E-01 | G             | 281 | 0.87 | 0.18 | 4.6E-01 |
| rs13112568 | ACSL1   | 4   | 185967293 | A   | 394 | 0.86 | 0.15 | 3.0E-01 | A                        | 292 | 0.84 | 0.18 | 3.5E-01 | A             | 281 | 0.80 | 0.19 | 2.5E-01 |
| rs13134663 | AIM     | 4   | 110060008 | G   | 394 | 0.98 | 0.14 | 8.9E-01 | G                        | 292 | 0.93 | 0.17 | 6.8E-01 | G             | 281 | 1.00 | 0.17 | 1.0E+00 |
| rs13171967 | ADRA1B  | 5   | 159310737 | T   | 394 | 1.37 | 0.17 | 6.6E-02 | T                        | 292 | 1.20 | 0.20 | 3.7E-01 | T             | 281 | 1.62 | 0.21 | 2.1E-02 |
| rs13184089 | CSNK1A1 | 5   | 148912761 | C   | 394 | 1.22 | 0.14 | 1.7E-01 | C                        | 292 | 1.07 | 0.17 | 6.9E-01 | C             | 281 | 1.34 | 0.18 | 1.1E-01 |
| rs1318720  | EPHB2   | 1   | 22939099  | C   | 386 | 0.94 | 0.14 | 6.7E-01 | C                        | 288 | 1.13 | 0.17 | 4.9E-01 | C             | 273 | 0.71 | 0.19 | 6.4E-02 |
| rs13191001 | OPRM1   | 6   | 154671959 | G   | 394 | 0.72 | 0.37 | 3.7E-01 | G                        | 292 | 0.80 | 0.43 | 6.0E-01 | G             | 281 | 0.56 | 0.51 | 2.6E-01 |
| rs1319339  | OPRM1   | 6   | 154372877 | C   | 394 | 1.27 | 0.20 | 2.4E-01 | C                        | 292 | 1.27 | 0.23 | 3.1E-01 | C             | 281 | 1.23 | 0.25 | 4.1E-01 |
| rs13193952 | OPRM1   | 6   | 154600769 | A   | 394 | 1.23 | 0.16 | 1.9E-01 | A                        | 292 | 1.41 | 0.18 | 6.3E-02 | A             | 281 | 1.03 | 0.21 | 8.9E-01 |
| rs1321099  | SLC32A1 | 20  | 36792059  | G   | 391 | 1.41 | 0.25 | 1.7E-01 | G                        | 290 | 1.87 | 0.28 | 2.7E-02 | G             | 279 | 0.98 | 0.34 | 9.5E-01 |
| rs1322183  | SLC32A1 | 20  | 36791688  | G   | 391 | 1.27 | 0.15 | 1.1E-01 | G                        | 289 | 1.41 | 0.18 | 5.7E-02 | G             | 280 | 1.19 | 0.19 | 3.6E-01 |
| rs13261054 | ADRA1A  | 8   | 26722962  | T   | 391 | 0.95 | 0.16 | 7.2E-01 | T                        | 289 | 0.98 | 0.18 | 9.1E-01 | T             | 279 | 0.91 | 0.20 | 6.5E-01 |
| rs13270252 | ADRA1A  | 8   | 26678379  | T   | 390 | 1.21 | 0.31 | 5.4E-01 | T                        | 289 | 1.39 | 0.35 | 3.6E-01 | T             | 278 | 1.01 | 0.40 | 9.8E-01 |
| rs13271367 | PPP3CC  | 8   | 22380522  | G   | 394 | 0.93 | 0.15 | 6.1E-01 | G                        | 292 | 1.07 | 0.18 | 7.3E-01 | G             | 281 | 0.77 | 0.19 | 1.7E-01 |
| rs13281802 | ADRA1A  | 8   | 26658328  | T   | 394 | 1.08 | 0.28 | 7.8E-01 | T                        | 292 | 1.32 | 0.32 | 3.8E-01 | T             | 281 | 0.81 | 0.38 | 5.7E-01 |

| SNP        | GENE     | CHR | BP        | TMD |     |      |      |         | TMD with widespread pain |     |      |      |         | Localized TMD |     |      |      |         |
|------------|----------|-----|-----------|-----|-----|------|------|---------|--------------------------|-----|------|------|---------|---------------|-----|------|------|---------|
|            |          |     |           | A1  | N   | OR   | SE   | P       | A1                       | N   | OR   | SE   | P       | A1            | N   | OR   | SE   | P       |
| rs1329119  | GBP2     | 1   | 89346614  | G   | 394 | 1.01 | 0.15 | 9.4E-01 | G                        | 292 | 0.87 | 0.18 | 4.6E-01 | G             | 281 | 1.09 | 0.19 | 6.5E-01 |
| rs13296    | HSP90AB1 | 6   | 44326098  | A   | 394 | 1.18 | 0.15 | 2.6E-01 | A                        | 292 | 1.29 | 0.18 | 1.7E-01 | A             | 281 | 1.11 | 0.19 | 5.7E-01 |
| rs13303344 | GABRD    | 1   | 1938260   | C   | 394 | 0.92 | 0.16 | 5.9E-01 | C                        | 292 | 1.04 | 0.19 | 8.5E-01 | C             | 281 | 0.93 | 0.20 | 7.0E-01 |
| rs1330581  | GAD2     | 10  | 26568841  | G   | 394 | 0.99 | 0.16 | 9.4E-01 | G                        | 292 | 1.11 | 0.19 | 5.8E-01 | G             | 281 | 0.85 | 0.20 | 4.0E-01 |
| rs13306006 | NPY1R    | 4   | 164473165 | T   | 394 | 0.87 | 0.53 | 7.9E-01 | T                        | 292 | 1.03 | 0.64 | 9.6E-01 | T             | 281 | 0.86 | 0.70 | 8.3E-01 |
| rs1332631  | INADL    | 1   | 62268948  | C   | 394 | 1.27 | 0.15 | 1.0E-01 | C                        | 292 | 1.38 | 0.18 | 7.5E-02 | C             | 281 | 1.16 | 0.19 | 4.3E-01 |
| rs1332636  | INADL    | 1   | 62148565  | A   | 394 | 1.16 | 0.16 | 3.7E-01 | A                        | 292 | 1.22 | 0.20 | 3.1E-01 | A             | 281 | 1.08 | 0.21 | 7.3E-01 |
| rs13357922 | CAMK2A   | 5   | 149628189 | T   | 394 | 1.03 | 0.15 | 8.2E-01 | T                        | 292 | 0.92 | 0.18 | 6.3E-01 | T             | 281 | 1.18 | 0.19 | 3.7E-01 |
| rs1336978  | AIM      | 10  | 108849094 | C   | 394 | 1.15 | 0.14 | 3.2E-01 | C                        | 292 | 1.14 | 0.18 | 4.6E-01 | C             | 281 | 1.18 | 0.18 | 3.6E-01 |
| rs1337912  | ADORA3   | 1   | 111888861 | C   | 393 | 1.06 | 0.14 | 6.8E-01 | C                        | 291 | 1.03 | 0.17 | 8.6E-01 | C             | 281 | 1.08 | 0.17 | 6.6E-01 |
| rs13390226 | ERBB4    | 2   | 212448106 | A   | 393 | 1.48 | 0.32 | 2.2E-01 | A                        | 291 | 1.42 | 0.37 | 3.4E-01 | A             | 280 | 1.39 | 0.40 | 4.1E-01 |
| rs1339408  | KCNK2    | 1   | 213432681 | A   | 394 | 1.23 | 0.33 | 5.2E-01 | A                        | 292 | 1.42 | 0.38 | 3.5E-01 | A             | 281 | 1.21 | 0.42 | 6.5E-01 |
| rs1339409  | KCNK2    | 1   | 213438268 | A   | 394 | 1.17 | 0.33 | 6.2E-01 | A                        | 292 | 1.30 | 0.39 | 4.9E-01 | A             | 281 | 1.21 | 0.42 | 6.5E-01 |
| rs13402180 | SCN9A    | 2   | 166853241 | C   | 393 | 0.94 | 0.15 | 6.7E-01 | C                        | 291 | 1.16 | 0.18 | 4.0E-01 | C             | 280 | 0.76 | 0.19 | 1.5E-01 |
| rs13411202 | TRPM8    | 2   | 234548882 | G   | 392 | 1.07 | 0.16 | 6.9E-01 | G                        | 291 | 0.82 | 0.19 | 3.2E-01 | G             | 279 | 1.41 | 0.20 | 9.3E-02 |
| rs1342018  | ANXA1    | 9   | 74971951  | A   | 394 | 1.11 | 0.14 | 4.8E-01 | A                        | 292 | 1.15 | 0.18 | 4.2E-01 | A             | 281 | 1.01 | 0.18 | 9.6E-01 |
| rs1344079  | ADRBK2   | 22  | 24422958  | A   | 394 | 1.08 | 0.38 | 8.5E-01 | A                        | 292 | 0.62 | 0.56 | 4.0E-01 | A             | 281 | 1.45 | 0.42 | 3.7E-01 |
| rs1345424  | GRIN2A   | 16  | 10158160  | C   | 393 | 0.91 | 0.15 | 5.2E-01 | C                        | 291 | 1.06 | 0.18 | 7.5E-01 | C             | 280 | 0.78 | 0.19 | 2.0E-01 |
| rs1345485  | GRIN2B   | 12  | 14013497  | C   | 393 | 1.15 | 0.53 | 7.9E-01 | C                        | 292 | 0.92 | 0.65 | 9.0E-01 | C             | 280 | 1.38 | 0.66 | 6.3E-01 |
| rs1346489  | GLRA1    | 5   | 151246727 | T   | 394 | 1.01 | 0.16 | 9.4E-01 | T                        | 292 | 0.90 | 0.19 | 5.9E-01 | T             | 281 | 1.10 | 0.20 | 6.3E-01 |
| rs1347201  | AIM      | 8   | 16581855  | T   | 394 | 0.83 | 0.14 | 1.9E-01 | T                        | 292 | 0.80 | 0.17 | 1.7E-01 | T             | 281 | 0.84 | 0.18 | 3.2E-01 |
| rs1348161  | PPP3CA   | 4   | 102471719 | T   | 394 | 0.93 | 0.16 | 6.3E-01 | T                        | 292 | 0.94 | 0.19 | 7.6E-01 | T             | 281 | 0.87 | 0.20 | 4.8E-01 |
| rs1349492  | DDC      | 7   | 50513953  | G   | 394 | 1.06 | 0.15 | 7.1E-01 | G                        | 292 | 1.15 | 0.18 | 4.3E-01 | G             | 281 | 0.96 | 0.19 | 8.3E-01 |
| rs1352250  | TPH2     | 12  | 70684051  | A   | 394 | 0.91 | 0.14 | 4.8E-01 | A                        | 292 | 0.87 | 0.17 | 4.3E-01 | A             | 281 | 1.00 | 0.18 | 9.9E-01 |
| rs1353410  | PTGER2   | 14  | 51851091  | T   | 389 | 0.67 | 0.38 | 2.8E-01 | T                        | 288 | 0.58 | 0.49 | 2.7E-01 | T             | 278 | 0.77 | 0.46 | 5.7E-01 |
| rs1353446  | ADRA1A   | 8   | 26731847  | A   | 394 | 1.05 | 0.16 | 7.5E-01 | A                        | 292 | 0.98 | 0.19 | 9.0E-01 | A             | 281 | 1.11 | 0.20 | 6.0E-01 |
| rs1353939  | NOS1     | 12  | 116159736 | T   | 394 | 0.94 | 0.18 | 7.1E-01 | T                        | 292 | 1.26 | 0.21 | 2.7E-01 | T             | 281 | 0.56 | 0.26 | 3.1E-02 |
| rs1357335  | ZFAND6   | 15  | 78155918  | T   | 389 | 0.96 | 0.14 | 7.9E-01 | T                        | 289 | 1.16 | 0.17 | 3.8E-01 | T             | 276 | 0.69 | 0.19 | 5.6E-02 |
| rs135750   | CSNK1E   | 22  | 37016181  | G   | 393 | 0.93 | 0.19 | 6.8E-01 | G                        | 291 | 0.90 | 0.23 | 6.3E-01 | G             | 280 | 0.88 | 0.24 | 6.0E-01 |
| rs135757   | CSNK1E   | 22  | 37033599  | A   | 390 | 0.95 | 0.16 | 7.5E-01 | A                        | 289 | 1.38 | 0.19 | 8.6E-02 | A             | 278 | 0.54 | 0.24 | 1.1E-02 |
| rs1358312  | PPP3CA   | 4   | 102190474 | T   | 394 | 1.20 | 0.18 | 3.2E-01 | T                        | 292 | 0.96 | 0.24 | 8.7E-01 | T             | 281 | 1.48 | 0.22 | 7.6E-02 |
| rs1363673  | GRIA1    | 5   | 153003358 | G   | 394 | 0.94 | 0.15 | 6.6E-01 | G                        | 292 | 0.98 | 0.17 | 9.1E-01 | G             | 281 | 0.91 | 0.19 | 6.2E-01 |
| rs1363697  | GABRB2   | 5   | 160741380 | C   | 394 | 1.02 | 0.18 | 9.3E-01 | C                        | 292 | 0.83 | 0.22 | 3.9E-01 | C             | 281 | 1.18 | 0.22 | 4.6E-01 |
| rs1365872  | HNRNPD   | 4   | 83507899  | T   | 394 | 1.10 | 0.31 | 7.5E-01 | T                        | 292 | 1.08 | 0.37 | 8.4E-01 | T             | 281 | 1.01 | 0.39 | 9.8E-01 |
| rs1366638  | SLC1A3   | 5   | 36652292  | A   | 394 | 0.94 | 0.15 | 7.0E-01 | A                        | 292 | 0.97 | 0.18 | 8.8E-01 | A             | 281 | 0.92 | 0.20 | 6.5E-01 |
| rs1368928  | AIM      | 2   | 8668914   | A   | 394 | 0.92 | 0.15 | 6.0E-01 | A                        | 292 | 1.00 | 0.19 | 1.0E+00 | A             | 281 | 0.86 | 0.19 | 4.3E-01 |
| rs1375164  | AIM      | 15  | 25965407  | T   | 394 | 1.24 | 0.17 | 2.1E-01 | T                        | 292 | 1.33 | 0.21 | 1.7E-01 | T             | 281 | 1.30 | 0.21 | 2.1E-01 |
| rs1382507  | TMSB10   | 2   | 84988991  | C   | 393 | 1.17 | 0.20 | 4.4E-01 | C                        | 291 | 1.19 | 0.24 | 4.7E-01 | C             | 280 | 1.11 | 0.25 | 6.6E-01 |
| rs1383914  | ADRA1A   | 8   | 26778966  | C   | 375 | 1.12 | 0.15 | 4.4E-01 | C                        | 278 | 1.11 | 0.18 | 5.9E-01 | C             | 266 | 1.12 | 0.19 | 5.4E-01 |

| SNP       | GENE    | CHR | BP        | TMD |     |      |      |         | TMD with widespread pain |     |      |      |         | Localized TMD |     |      |      |         |
|-----------|---------|-----|-----------|-----|-----|------|------|---------|--------------------------|-----|------|------|---------|---------------|-----|------|------|---------|
|           |         |     |           | A1  | N   | OR   | SE   | P       | A1                       | N   | OR   | SE   | P       | A1            | N   | OR   | SE   | P       |
| rs1384292 | ERBB4   | 2   | 213110886 | C   | 387 | 0.76 | 0.15 | 6.4E-02 | C                        | 287 | 0.72 | 0.18 | 6.4E-02 | C             | 276 | 0.81 | 0.19 | 2.6E-01 |
| rs1386492 | TPH2    | 12  | 70648532  | C   | 394 | 0.74 | 0.20 | 1.2E-01 | C                        | 292 | 0.68 | 0.25 | 1.2E-01 | C             | 281 | 0.84 | 0.24 | 4.6E-01 |
| rs1386496 | TPH2    | 12  | 70637057  | G   | 394 | 0.75 | 0.22 | 1.9E-01 | G                        | 292 | 0.67 | 0.28 | 1.6E-01 | G             | 281 | 0.86 | 0.27 | 5.7E-01 |
| rs1388628 | P2RY13  | 3   | 152527936 | G   | 394 | 0.91 | 0.17 | 5.6E-01 | G                        | 292 | 0.99 | 0.20 | 9.4E-01 | G             | 281 | 0.87 | 0.21 | 5.0E-01 |
| rs13900   | CCL2    | 17  | 29608024  | T   | 394 | 0.94 | 0.16 | 6.9E-01 | T                        | 292 | 0.82 | 0.20 | 3.2E-01 | T             | 281 | 1.07 | 0.20 | 7.3E-01 |
| rs1394785 | ERBB4   | 2   | 212919219 | G   | 394 | 0.88 | 0.15 | 4.1E-01 | G                        | 292 | 0.84 | 0.18 | 3.5E-01 | G             | 281 | 0.85 | 0.19 | 3.8E-01 |
| rs1397529 | AIM     | 4   | 144611612 | C   | 388 | 1.05 | 0.15 | 7.4E-01 | C                        | 288 | 0.90 | 0.19 | 5.8E-01 | C             | 277 | 1.25 | 0.19 | 2.5E-01 |
| rs1401635 | BDNF    | 11  | 27650567  | C   | 393 | 1.47 | 0.16 | 1.8E-02 | C                        | 291 | 1.28 | 0.19 | 2.1E-01 | C             | 281 | 1.75 | 0.20 | 5.4E-03 |
| rs1402851 | AIM     | 8   | 84417952  | T   | 394 | 1.27 | 0.22 | 2.8E-01 | T                        | 292 | 1.27 | 0.28 | 3.9E-01 | T             | 281 | 1.29 | 0.27 | 3.4E-01 |
| rs1403543 | AGTR2   | 23  | 115216220 | G   | 394 | 0.96 | 0.15 | 7.6E-01 | G                        | 292 | 1.03 | 0.18 | 8.9E-01 | G             | 281 | 0.85 | 0.19 | 3.8E-01 |
| rs140674  | GABRG3  | 15  | 25156714  | C   | 394 | 1.13 | 0.49 | 8.1E-01 | C                        | 292 | 1.49 | 0.53 | 4.6E-01 | C             | 281 | 0.57 | 0.81 | 4.9E-01 |
| rs140679  | GABRG3  | 15  | 25446271  | C   | 393 | 1.07 | 0.14 | 6.3E-01 | C                        | 292 | 1.10 | 0.17 | 5.5E-01 | C             | 280 | 1.04 | 0.18 | 8.2E-01 |
| rs140700  | SLC6A4  | 17  | 25567515  | T   | 394 | 1.78 | 0.24 | 1.6E-02 | T                        | 292 | 1.56 | 0.29 | 1.2E-01 | T             | 281 | 1.84 | 0.28 | 3.1E-02 |
| rs140701  | SLC6A4  | 17  | 25562658  | T   | 394 | 0.76 | 0.14 | 4.9E-02 | T                        | 292 | 0.82 | 0.17 | 2.5E-01 | T             | 281 | 0.75 | 0.18 | 1.1E-01 |
| rs1409351 | PRKG1   | 10  | 52956847  | G   | 393 | 1.00 | 0.15 | 9.9E-01 | G                        | 291 | 1.07 | 0.18 | 7.1E-01 | G             | 280 | 0.93 | 0.19 | 7.0E-01 |
| rs1409978 | PTGER3  | 1   | 71125692  | C   | 391 | 0.87 | 0.17 | 4.1E-01 | C                        | 289 | 0.85 | 0.21 | 4.6E-01 | C             | 279 | 0.90 | 0.22 | 6.2E-01 |
| rs1409986 | PTGER3  | 1   | 71104086  | A   | 394 | 1.06 | 0.24 | 8.1E-01 | A                        | 292 | 1.04 | 0.30 | 8.9E-01 | A             | 281 | 1.12 | 0.32 | 7.2E-01 |
| rs1410082 | NTRK1   | 1   | 155108298 | A   | 393 | 1.24 | 0.39 | 5.7E-01 | A                        | 291 | 2.53 | 0.44 | 3.5E-02 | A             | 280 | 0.59 | 0.67 | 4.3E-01 |
| rs14134   | NFKBIZ  | 3   | 103058865 | T   | 394 | 0.86 | 0.16 | 3.5E-01 | T                        | 292 | 0.86 | 0.19 | 4.2E-01 | T             | 281 | 0.83 | 0.20 | 3.4E-01 |
| rs1413582 | GRK5    | 10  | 121122182 | T   | 394 | 1.32 | 0.15 | 6.5E-02 | T                        | 292 | 1.46 | 0.18 | 4.0E-02 | T             | 281 | 1.23 | 0.18 | 2.6E-01 |
| rs14138   | PRKCE   | 2   | 46267950  | A   | 393 | 1.15 | 0.19 | 4.6E-01 | A                        | 291 | 0.94 | 0.24 | 7.9E-01 | A             | 280 | 1.37 | 0.23 | 1.7E-01 |
| rs1422256 | CACNA1A | 19  | 13468971  | C   | 394 | 1.10 | 0.15 | 5.4E-01 | C                        | 292 | 1.07 | 0.19 | 7.1E-01 | C             | 281 | 1.17 | 0.19 | 4.3E-01 |
| rs1422889 | GRIA1   | 5   | 152996726 | A   | 394 | 1.20 | 0.20 | 3.7E-01 | A                        | 292 | 1.11 | 0.24 | 6.7E-01 | A             | 281 | 1.40 | 0.25 | 1.8E-01 |
| rs14240   | SLC18A2 | 10  | 119027061 | T   | 385 | 1.23 | 0.14 | 1.5E-01 | T                        | 284 | 1.03 | 0.17 | 8.7E-01 | T             | 275 | 1.51 | 0.18 | 2.2E-02 |
| rs1424569 | CHRM2   | 7   | 136219956 | T   | 390 | 0.77 | 0.14 | 6.6E-02 | T                        | 288 | 0.72 | 0.18 | 6.3E-02 | T             | 278 | 0.88 | 0.18 | 4.5E-01 |
| rs1425910 | OPRK1   | 8   | 54299512  | G   | 394 | 0.91 | 0.17 | 5.6E-01 | G                        | 292 | 0.94 | 0.20 | 7.7E-01 | G             | 281 | 0.93 | 0.21 | 7.2E-01 |
| rs1428155 | GLRA1   | 5   | 151261826 | C   | 394 | 1.04 | 0.15 | 7.7E-01 | C                        | 292 | 1.00 | 0.18 | 9.9E-01 | C             | 281 | 1.10 | 0.18 | 6.0E-01 |
| rs1432622 | ADRB2   | 5   | 148183955 | T   | 391 | 1.12 | 0.14 | 4.4E-01 | T                        | 290 | 1.08 | 0.17 | 6.6E-01 | T             | 278 | 1.23 | 0.17 | 2.4E-01 |
| rs1436633 | MME     | 3   | 156349147 | C   | 393 | 1.07 | 0.15 | 6.7E-01 | C                        | 291 | 1.02 | 0.18 | 9.4E-01 | C             | 281 | 1.12 | 0.19 | 5.5E-01 |
| rs1437135 | NQO1    | 16  | 68315329  | G   | 394 | 0.98 | 0.19 | 9.3E-01 | G                        | 292 | 0.78 | 0.24 | 2.8E-01 | G             | 281 | 1.16 | 0.24 | 5.4E-01 |
| rs1437277 | PENK    | 8   | 57519288  | T   | 394 | 0.87 | 0.17 | 4.0E-01 | T                        | 292 | 0.87 | 0.20 | 5.0E-01 | T             | 281 | 0.80 | 0.22 | 3.2E-01 |
| rs1439009 | P2RY1   | 3   | 154034515 | T   | 394 | 0.69 | 0.33 | 2.6E-01 | T                        | 292 | 0.70 | 0.40 | 3.7E-01 | T             | 281 | 0.68 | 0.43 | 3.6E-01 |
| rs1439993 | SCN3A   | 2   | 165661828 | C   | 392 | 1.03 | 0.18 | 8.5E-01 | C                        | 290 | 0.95 | 0.22 | 8.2E-01 | C             | 279 | 1.17 | 0.22 | 4.6E-01 |
| rs144173  | EPHB4   | 7   | 100254186 | A   | 394 | 1.36 | 0.15 | 4.9E-02 | A                        | 292 | 1.34 | 0.19 | 1.2E-01 | A             | 281 | 1.40 | 0.19 | 7.6E-02 |
| rs1442060 | GABRA2  | 4   | 46060824  | A   | 391 | 1.06 | 0.15 | 7.2E-01 | A                        | 290 | 0.98 | 0.18 | 9.0E-01 | A             | 279 | 1.17 | 0.19 | 4.1E-01 |
| rs1442062 | GABRA2  | 4   | 46071833  | A   | 393 | 1.18 | 0.16 | 3.1E-01 | A                        | 291 | 1.05 | 0.20 | 8.0E-01 | A             | 280 | 1.31 | 0.21 | 2.0E-01 |
| rs1444893 | AIM     | 4   | 82602473  | T   | 394 | 0.95 | 0.19 | 7.8E-01 | T                        | 292 | 0.77 | 0.23 | 2.6E-01 | T             | 281 | 1.03 | 0.23 | 8.9E-01 |
| rs1445604 | GRIA4   | 11  | 105003305 | G   | 394 | 1.01 | 0.14 | 9.4E-01 | G                        | 292 | 1.00 | 0.17 | 9.9E-01 | G             | 281 | 1.03 | 0.18 | 8.6E-01 |
| rs1445607 | GRIA4   | 11  | 105061217 | C   | 394 | 0.94 | 0.14 | 6.7E-01 | C                        | 292 | 1.05 | 0.18 | 7.7E-01 | C             | 281 | 0.86 | 0.18 | 4.0E-01 |

| SNP       | GENE     | CHR | BP        | TMD |     |      |      |         | TMD with widespread pain |     |      |      |         | Localized TMD |     |      |      |         |
|-----------|----------|-----|-----------|-----|-----|------|------|---------|--------------------------|-----|------|------|---------|---------------|-----|------|------|---------|
|           |          |     |           | A1  | N   | OR   | SE   | P       | A1                       | N   | OR   | SE   | P       | A1            | N   | OR   | SE   | P       |
| rs1445652 | KCNJ3    | 2   | 155376706 | A   | 393 | 1.08 | 0.18 | 6.8E-01 | A                        | 291 | 1.04 | 0.22 | 8.5E-01 | A             | 280 | 1.23 | 0.22 | 3.6E-01 |
| rs1446959 | AIM      | 1   | 157873428 | A   | 393 | 1.03 | 0.15 | 8.2E-01 | A                        | 291 | 1.06 | 0.17 | 7.4E-01 | A             | 280 | 0.99 | 0.19 | 9.4E-01 |
| rs1448239 | GRIN2A   | 16  | 10094936  | C   | 394 | 0.87 | 0.20 | 4.8E-01 | C                        | 292 | 0.88 | 0.25 | 6.2E-01 | C             | 281 | 0.90 | 0.25 | 6.6E-01 |
| rs1454102 | ANXA2    | 15  | 58479785  | C   | 393 | 1.08 | 0.16 | 6.1E-01 | C                        | 291 | 1.00 | 0.19 | 9.8E-01 | C             | 280 | 1.22 | 0.19 | 3.1E-01 |
| rs1461193 | SCN1A    | 2   | 166612592 | G   | 394 | 1.23 | 0.15 | 1.8E-01 | G                        | 292 | 0.96 | 0.20 | 8.4E-01 | G             | 281 | 1.50 | 0.18 | 2.7E-02 |
| rs1461195 | SCN1A    | 2   | 166574044 | G   | 394 | 0.89 | 0.20 | 5.5E-01 | G                        | 292 | 1.04 | 0.24 | 8.6E-01 | G             | 281 | 0.84 | 0.26 | 5.2E-01 |
| rs1461197 | SCN1A    | 2   | 166632718 | A   | 393 | 0.77 | 0.15 | 7.9E-02 | A                        | 291 | 0.80 | 0.19 | 2.4E-01 | A             | 280 | 0.75 | 0.19 | 1.4E-01 |
| rs1461227 | GRIA1    | 5   | 153149787 | T   | 393 | 0.76 | 0.20 | 1.7E-01 | T                        | 291 | 0.69 | 0.25 | 1.3E-01 | T             | 281 | 0.83 | 0.25 | 4.5E-01 |
| rs1463748 | GRIA1    | 5   | 152893595 | T   | 394 | 0.89 | 0.14 | 4.1E-01 | T                        | 292 | 0.90 | 0.17 | 5.4E-01 | T             | 281 | 0.88 | 0.17 | 4.5E-01 |
| rs1466684 | P2RY13   | 3   | 152528998 | G   | 394 | 1.34 | 0.19 | 1.3E-01 | G                        | 292 | 1.11 | 0.25 | 6.8E-01 | G             | 281 | 1.66 | 0.23 | 3.0E-02 |
| rs1467116 | ACCN4    | 2   | 220097599 | C   | 393 | 1.19 | 0.15 | 2.3E-01 | C                        | 291 | 1.17 | 0.18 | 3.8E-01 | C             | 280 | 1.21 | 0.19 | 3.2E-01 |
| rs1467913 | CACNA2D2 | 3   | 50500021  | A   | 393 | 0.99 | 0.20 | 9.4E-01 | A                        | 292 | 0.90 | 0.24 | 6.7E-01 | A             | 280 | 1.06 | 0.24 | 8.0E-01 |
| rs1469442 | CAMK4    | 5   | 110603980 | C   | 392 | 0.98 | 0.14 | 8.9E-01 | C                        | 290 | 1.02 | 0.17 | 8.9E-01 | C             | 280 | 0.96 | 0.18 | 8.1E-01 |
| rs1473799 | GRK5     | 10  | 121052697 | G   | 394 | 1.05 | 0.14 | 7.2E-01 | G                        | 292 | 1.15 | 0.17 | 4.1E-01 | G             | 281 | 0.95 | 0.18 | 7.6E-01 |
| rs1475563 | INADL    | 1   | 62352411  | G   | 394 | 1.13 | 0.16 | 4.3E-01 | G                        | 292 | 1.07 | 0.19 | 7.4E-01 | G             | 281 | 1.27 | 0.20 | 2.3E-01 |
| rs1487275 | TPH2     | 12  | 70696559  | C   | 394 | 0.86 | 0.15 | 3.3E-01 | C                        | 292 | 0.77 | 0.20 | 1.8E-01 | C             | 281 | 1.01 | 0.19 | 9.4E-01 |
| rs1487276 | TPH2     | 12  | 70691326  | T   | 394 | 0.84 | 0.19 | 3.8E-01 | T                        | 292 | 0.70 | 0.25 | 1.5E-01 | T             | 281 | 1.09 | 0.23 | 7.1E-01 |
| rs1488299 | AIM      | 4   | 26870541  | T   | 393 | 0.86 | 0.15 | 3.0E-01 | T                        | 291 | 0.77 | 0.18 | 1.6E-01 | T             | 280 | 0.99 | 0.19 | 9.5E-01 |
| rs1490406 | NTRK2    | 9   | 86812159  | C   | 385 | 1.06 | 0.10 | 5.7E-01 | C                        | 283 | 1.06 | 0.13 | 6.7E-01 | C             | 276 | 1.09 | 0.13 | 4.8E-01 |
| rs1491961 | CCR1     | 3   | 46225352  | T   | 394 | 1.00 | 0.17 | 1.0E+00 | T                        | 292 | 0.99 | 0.20 | 9.8E-01 | T             | 281 | 0.96 | 0.21 | 8.4E-01 |
| rs1491980 | P2RY13   | 3   | 152528351 | G   | 393 | 1.31 | 0.19 | 1.6E-01 | G                        | 291 | 1.06 | 0.26 | 8.3E-01 | G             | 280 | 1.65 | 0.23 | 3.2E-02 |
| rs1492078 | AGTR1    | 3   | 149897867 | T   | 387 | 0.91 | 0.15 | 5.2E-01 | T                        | 289 | 0.80 | 0.18 | 2.1E-01 | T             | 275 | 1.10 | 0.19 | 6.3E-01 |
| rs1493383 | GRIA1    | 5   | 152971591 | T   | 394 | 0.92 | 0.18 | 6.4E-01 | T                        | 292 | 1.02 | 0.22 | 9.2E-01 | T             | 281 | 0.82 | 0.24 | 4.2E-01 |
| rs1494490 | ADORA1   | 1   | 201341253 | C   | 394 | 1.00 | 0.15 | 1.0E+00 | C                        | 292 | 1.14 | 0.18 | 4.9E-01 | C             | 281 | 0.86 | 0.19 | 4.5E-01 |
| rs1495099 | PPP1R1B  | 17  | 35037990  | C   | 388 | 0.83 | 0.15 | 2.3E-01 | C                        | 288 | 0.97 | 0.19 | 8.7E-01 | C             | 277 | 0.75 | 0.20 | 1.5E-01 |
| rs1495946 | HNRNPU   | 1   | 243080430 | A   | 394 | 0.82 | 0.23 | 3.7E-01 | A                        | 292 | 0.85 | 0.27 | 5.4E-01 | A             | 281 | 0.78 | 0.29 | 3.8E-01 |
| rs1497366 | ACCN1    | 17  | 28636866  | G   | 394 | 0.87 | 0.14 | 3.3E-01 | G                        | 292 | 1.07 | 0.17 | 7.1E-01 | G             | 281 | 0.71 | 0.18 | 5.8E-02 |
| rs1502593 | SCD      | 10  | 102099192 | A   | 394 | 0.97 | 0.15 | 8.3E-01 | A                        | 292 | 0.86 | 0.18 | 4.0E-01 | A             | 281 | 1.16 | 0.19 | 4.3E-01 |
| rs1503079 | AIM      | 3   | 106241722 | T   | 394 | 0.95 | 0.14 | 7.2E-01 | T                        | 292 | 0.95 | 0.17 | 7.8E-01 | T             | 281 | 0.99 | 0.19 | 9.5E-01 |
| rs1507086 | AIM      | 4   | 41651170  | C   | 393 | 0.75 | 0.16 | 8.2E-02 | C                        | 291 | 0.83 | 0.19 | 3.2E-01 | C             | 280 | 0.60 | 0.22 | 2.3E-02 |
| rs150846  | TRPV1    | 17  | 3441617   | A   | 394 | 0.92 | 0.15 | 5.6E-01 | A                        | 292 | 0.86 | 0.18 | 4.2E-01 | A             | 281 | 1.08 | 0.18 | 6.9E-01 |
| rs150908  | TRPV1    | 17  | 3431117   | A   | 394 | 1.17 | 0.14 | 2.7E-01 | A                        | 292 | 1.24 | 0.17 | 2.1E-01 | A             | 281 | 1.13 | 0.18 | 4.9E-01 |
| rs1511802 | KLKB1    | 4   | 187387800 | C   | 394 | 1.42 | 0.15 | 2.2E-02 | C                        | 292 | 1.36 | 0.18 | 9.6E-02 | C             | 281 | 1.39 | 0.19 | 7.8E-02 |
| rs1514280 | ACE2     | 23  | 15496369  | A   | 394 | 1.04 | 0.15 | 7.7E-01 | A                        | 292 | 1.16 | 0.17 | 3.8E-01 | A             | 281 | 0.89 | 0.19 | 5.3E-01 |
| rs1514348 | ESR1     | 6   | 152224008 | G   | 393 | 1.39 | 0.14 | 2.4E-02 | G                        | 291 | 1.33 | 0.17 | 9.8E-02 | G             | 281 | 1.44 | 0.18 | 4.9E-02 |
| rs1514626 | AIM      | 8   | 132834923 | T   | 394 | 1.02 | 0.21 | 9.2E-01 | T                        | 292 | 1.02 | 0.25 | 9.4E-01 | T             | 281 | 0.99 | 0.26 | 9.7E-01 |
| rs1518111 | IL10     | 1   | 205011268 | T   | 393 | 1.05 | 0.17 | 7.6E-01 | T                        | 291 | 1.12 | 0.21 | 5.9E-01 | T             | 280 | 1.13 | 0.22 | 5.9E-01 |
| rs1519260 | AIM      | 3   | 137062756 | C   | 394 | 1.05 | 0.14 | 7.3E-01 | C                        | 292 | 1.00 | 0.17 | 9.9E-01 | C             | 281 | 1.13 | 0.18 | 4.9E-01 |
| rs1522984 | PRKCE    | 2   | 45794083  | A   | 394 | 1.08 | 0.16 | 6.4E-01 | A                        | 292 | 1.16 | 0.18 | 4.3E-01 | A             | 281 | 0.96 | 0.21 | 8.5E-01 |



| SNP       | GENE    | CHR | BP        | TMD |     |      |      |         | TMD with widespread pain |     |      |      |         | Localized TMD |     |      |      |         |
|-----------|---------|-----|-----------|-----|-----|------|------|---------|--------------------------|-----|------|------|---------|---------------|-----|------|------|---------|
|           |         |     |           | A1  | N   | OR   | SE   | P       | A1                       | N   | OR   | SE   | P       | A1            | N   | OR   | SE   | P       |
| rs1528880 | PRKG1   | 10  | 53706515  | A   | 394 | 0.96 | 0.27 | 8.9E-01 | A                        | 292 | 1.14 | 0.31 | 6.7E-01 | A             | 281 | 0.73 | 0.38 | 4.2E-01 |
| rs153050  | VPS4A   | 16  | 67907239  | T   | 385 | 1.04 | 0.16 | 7.8E-01 | T                        | 284 | 1.06 | 0.19 | 7.7E-01 | T             | 273 | 0.95 | 0.19 | 7.9E-01 |
| rs1532052 | AIM     | 12  | 53647581  | G   | 393 | 1.29 | 0.18 | 1.6E-01 | G                        | 291 | 1.07 | 0.23 | 7.6E-01 | G             | 281 | 1.66 | 0.23 | 2.5E-02 |
| rs1532397 | HNRNPU  | 1   | 243095775 | A   | 394 | 0.95 | 0.15 | 7.1E-01 | A                        | 292 | 1.02 | 0.18 | 9.0E-01 | A             | 281 | 0.87 | 0.19 | 4.6E-01 |
| rs1533476 | PRKCE   | 2   | 45834615  | T   | 394 | 0.81 | 0.16 | 1.7E-01 | T                        | 292 | 0.69 | 0.19 | 4.8E-02 | T             | 281 | 0.95 | 0.19 | 7.7E-01 |
| rs1533499 | GRK7    | 3   | 142979664 | G   | 394 | 0.93 | 0.15 | 6.1E-01 | G                        | 292 | 0.88 | 0.18 | 4.8E-01 | G             | 281 | 0.87 | 0.19 | 4.7E-01 |
| rs1534891 | CSNK1E  | 22  | 37025045  | T   | 394 | 1.09 | 0.20 | 6.8E-01 | T                        | 292 | 1.49 | 0.23 | 8.5E-02 | T             | 281 | 0.70 | 0.29 | 2.2E-01 |
| rs1538956 | AIM     | 6   | 127005719 | T   | 393 | 1.02 | 0.14 | 8.8E-01 | T                        | 291 | 1.08 | 0.17 | 6.6E-01 | T             | 280 | 0.93 | 0.18 | 6.7E-01 |
| rs1539019 | NLRP3   | 1   | 245666924 | A   | 393 | 1.14 | 0.15 | 3.7E-01 | A                        | 291 | 1.50 | 0.18 | 2.7E-02 | A             | 280 | 0.88 | 0.18 | 4.9E-01 |
| rs1540310 | KCNS1   | 20  | 43153399  | G   | 390 | 0.90 | 0.14 | 4.4E-01 | G                        | 289 | 0.96 | 0.17 | 8.1E-01 | G             | 280 | 0.77 | 0.18 | 1.3E-01 |
| rs1542466 | EREG    | 4   | 75474999  | G   | 394 | 0.87 | 0.17 | 4.1E-01 | G                        | 292 | 0.84 | 0.20 | 4.0E-01 | G             | 281 | 0.79 | 0.21 | 2.7E-01 |
| rs1544325 | COMT    | 22  | 18311668  | A   | 392 | 1.08 | 0.14 | 5.8E-01 | A                        | 291 | 1.00 | 0.17 | 9.9E-01 | A             | 280 | 1.20 | 0.18 | 3.2E-01 |
| rs1548904 | SLC6A13 | 12  | 242643    | A   | 394 | 0.84 | 0.15 | 2.4E-01 | A                        | 292 | 0.87 | 0.18 | 4.5E-01 | A             | 281 | 0.78 | 0.18 | 1.8E-01 |
| rs1549339 | HTR2B   | 2   | 231691070 | A   | 394 | 1.12 | 0.15 | 4.4E-01 | A                        | 292 | 1.14 | 0.18 | 4.7E-01 | A             | 281 | 1.09 | 0.19 | 6.5E-01 |
| rs1549758 | NOS3    | 7   | 150326659 | T   | 386 | 0.98 | 0.16 | 9.1E-01 | T                        | 287 | 1.03 | 0.19 | 8.6E-01 | T             | 276 | 0.91 | 0.20 | 6.3E-01 |
| rs1550798 | KCNJ3   | 2   | 155387083 | A   | 392 | 0.89 | 0.15 | 4.2E-01 | A                        | 290 | 0.83 | 0.18 | 3.0E-01 | A             | 280 | 0.87 | 0.18 | 4.6E-01 |
| rs1551347 | ANXA2   | 15  | 58453520  | C   | 394 | 1.00 | 0.22 | 1.0E+00 | C                        | 292 | 0.86 | 0.27 | 5.8E-01 | C             | 281 | 1.04 | 0.26 | 8.9E-01 |
| rs1552227 | NOS1    | 12  | 116263418 | T   | 394 | 1.08 | 0.15 | 6.4E-01 | T                        | 292 | 0.93 | 0.19 | 7.0E-01 | T             | 281 | 1.32 | 0.19 | 1.5E-01 |
| rs1552314 | AIM     | 8   | 93173981  | G   | 394 | 1.26 | 0.18 | 1.9E-01 | G                        | 292 | 1.68 | 0.22 | 1.6E-02 | G             | 281 | 1.07 | 0.23 | 7.7E-01 |
| rs1553005 | CALCA   | 11  | 14951066  | C   | 390 | 1.26 | 0.16 | 1.5E-01 | C                        | 290 | 1.17 | 0.19 | 4.1E-01 | C             | 278 | 1.22 | 0.20 | 3.1E-01 |
| rs1554286 | IL10    | 1   | 205010856 | A   | 393 | 1.09 | 0.18 | 6.3E-01 | A                        | 291 | 1.07 | 0.22 | 7.6E-01 | A             | 281 | 1.22 | 0.22 | 3.8E-01 |
| rs1556832 | ADRA1D  | 20  | 4163557   | C   | 394 | 0.85 | 0.14 | 2.5E-01 | C                        | 292 | 0.85 | 0.18 | 3.5E-01 | C             | 281 | 0.87 | 0.18 | 4.1E-01 |
| rs1557545 | GRIA3   | 23  | 122148800 | A   | 394 | 1.07 | 0.18 | 7.2E-01 | A                        | 292 | 0.98 | 0.22 | 9.2E-01 | A             | 281 | 1.17 | 0.22 | 4.7E-01 |
| rs1558542 | EGFR    | 7   | 55101766  | T   | 394 | 0.83 | 0.18 | 3.2E-01 | T                        | 292 | 0.85 | 0.22 | 4.5E-01 | T             | 281 | 0.82 | 0.23 | 4.0E-01 |
| rs1559483 | KCNIP3  | 2   | 95333606  | C   | 393 | 1.05 | 0.16 | 7.8E-01 | C                        | 292 | 0.92 | 0.19 | 6.5E-01 | C             | 280 | 1.24 | 0.19 | 2.7E-01 |
| rs1560409 | SC5DL   | 11  | 120665270 | C   | 393 | 1.30 | 0.15 | 7.8E-02 | C                        | 291 | 1.23 | 0.18 | 2.5E-01 | C             | 280 | 1.33 | 0.19 | 1.3E-01 |
| rs1563382 | AIM     | 3   | 79319581  | G   | 394 | 0.67 | 0.23 | 8.8E-02 | G                        | 292 | 0.88 | 0.27 | 6.3E-01 | G             | 281 | 0.47 | 0.35 | 3.1E-02 |
| rs1563826 | EREG    | 4   | 75454388  | T   | 392 | 0.88 | 0.16 | 4.2E-01 | T                        | 291 | 0.87 | 0.20 | 4.9E-01 | T             | 279 | 0.77 | 0.21 | 2.1E-01 |
| rs1563945 | PNOC    | 8   | 28230805  | C   | 394 | 0.93 | 0.22 | 7.4E-01 | C                        | 292 | 1.12 | 0.26 | 6.5E-01 | C             | 281 | 0.86 | 0.29 | 6.0E-01 |
| rs1565823 | PRKACB  | 1   | 84349208  | G   | 394 | 0.88 | 0.14 | 3.9E-01 | G                        | 292 | 0.98 | 0.18 | 8.9E-01 | G             | 281 | 0.80 | 0.18 | 2.3E-01 |
| rs1565923 | ERBB2   | 17  | 35112204  | A   | 394 | 0.75 | 0.16 | 6.4E-02 | A                        | 292 | 0.88 | 0.19 | 5.1E-01 | A             | 281 | 0.65 | 0.21 | 3.8E-02 |
| rs1566772 | STAU2   | 8   | 74752627  | C   | 394 | 0.97 | 0.18 | 8.5E-01 | C                        | 292 | 1.02 | 0.22 | 9.3E-01 | C             | 281 | 0.87 | 0.24 | 5.7E-01 |
| rs16006   | CACNA1A | 19  | 13331522  | C   | 394 | 0.92 | 0.40 | 8.4E-01 | C                        | 292 | 1.06 | 0.49 | 9.1E-01 | C             | 281 | 1.01 | 0.52 | 9.8E-01 |
| rs16012   | CACNA1A | 19  | 13280235  | C   | 394 | 0.44 | 0.55 | 1.4E-01 | C                        | 292 | 0.48 | 0.66 | 2.7E-01 | C             | 281 | 0.35 | 0.78 | 1.8E-01 |
| rs16016   | CACNA1A | 19  | 13275594  | T   | 394 | 0.72 | 0.21 | 1.2E-01 | T                        | 292 | 0.83 | 0.25 | 4.6E-01 | T             | 281 | 0.61 | 0.28 | 8.3E-02 |
| rs16018   | CACNA1A | 19  | 13272482  | G   | 393 | 0.99 | 0.15 | 9.6E-01 | G                        | 291 | 0.98 | 0.19 | 9.3E-01 | G             | 280 | 1.00 | 0.18 | 9.8E-01 |
| rs16025   | CACNA1A | 19  | 13270390  | T   | 394 | 0.95 | 0.19 | 7.8E-01 | T                        | 292 | 0.98 | 0.23 | 9.3E-01 | T             | 281 | 0.98 | 0.24 | 9.2E-01 |
| rs16027   | CACNA1A | 19  | 13258560  | T   | 394 | 1.03 | 0.25 | 9.0E-01 | T                        | 292 | 1.11 | 0.31 | 7.3E-01 | T             | 281 | 0.98 | 0.32 | 9.4E-01 |
| rs16030   | CACNA1A | 19  | 13248904  | G   | 394 | 0.63 | 0.18 | 1.1E-02 | G                        | 292 | 0.66 | 0.22 | 5.9E-02 | G             | 281 | 0.62 | 0.23 | 4.2E-02 |

| SNP        | GENE    | CHR | BP        | TMD |     |      |      |         | TMD with widespread pain |     |      |      |         | Localized TMD |     |      |      |         |
|------------|---------|-----|-----------|-----|-----|------|------|---------|--------------------------|-----|------|------|---------|---------------|-----|------|------|---------|
|            |         |     |           | A1  | N   | OR   | SE   | P       | A1                       | N   | OR   | SE   | P       | A1            | N   | OR   | SE   | P       |
| rs1609480  | SLC6A11 | 3   | 10876959  | T   | 394 | 0.84 | 0.15 | 2.3E-01 | T                        | 292 | 0.92 | 0.18 | 6.4E-01 | T             | 281 | 0.74 | 0.18 | 9.5E-02 |
| rs161381   | TRPV1   | 17  | 3450276   | T   | 394 | 1.20 | 0.19 | 3.4E-01 | T                        | 292 | 1.35 | 0.23 | 1.9E-01 | T             | 281 | 1.23 | 0.24 | 3.9E-01 |
| rs16140    | NPY     | 7   | 24291333  | G   | 384 | 1.12 | 0.16 | 5.0E-01 | G                        | 288 | 1.20 | 0.20 | 3.7E-01 | G             | 273 | 1.09 | 0.22 | 7.0E-01 |
| rs16147    | NPY     | 7   | 24289935  | T   | 392 | 0.84 | 0.15 | 2.4E-01 | T                        | 290 | 0.86 | 0.18 | 3.8E-01 | T             | 280 | 0.83 | 0.19 | 3.4E-01 |
| rs1621388  | P2RX7   | 12  | 120106946 | A   | 394 | 0.98 | 0.15 | 8.8E-01 | A                        | 292 | 1.17 | 0.18 | 4.0E-01 | A             | 281 | 0.83 | 0.19 | 3.3E-01 |
| rs1634499  | CCL3    | 17  | 31444038  | G   | 394 | 1.18 | 0.17 | 3.2E-01 | G                        | 292 | 1.13 | 0.20 | 5.5E-01 | G             | 281 | 1.27 | 0.21 | 2.4E-01 |
| rs1634508  | CCL4    | 17  | 31450358  | A   | 391 | 1.19 | 0.17 | 3.0E-01 | A                        | 289 | 1.14 | 0.20 | 5.2E-01 | A             | 278 | 1.28 | 0.21 | 2.2E-01 |
| rs1644498  | CAMK4   | 5   | 110709762 | A   | 394 | 0.92 | 0.15 | 5.9E-01 | A                        | 292 | 0.84 | 0.19 | 3.6E-01 | A             | 281 | 1.08 | 0.19 | 6.9E-01 |
| rs1644501  | CAMK4   | 5   | 110700432 | A   | 390 | 0.92 | 0.15 | 5.9E-01 | A                        | 288 | 0.86 | 0.19 | 4.3E-01 | A             | 279 | 1.05 | 0.19 | 8.0E-01 |
| rs1645660  | SLC1A3  | 5   | 36680057  | A   | 393 | 1.02 | 0.14 | 8.9E-01 | A                        | 292 | 1.19 | 0.17 | 3.1E-01 | A             | 280 | 0.87 | 0.18 | 4.5E-01 |
| rs1650790  | CAMK4   | 5   | 110631388 | G   | 391 | 1.03 | 0.14 | 8.4E-01 | G                        | 289 | 1.12 | 0.17 | 5.3E-01 | G             | 280 | 0.93 | 0.17 | 6.8E-01 |
| rs1653586  | P2RX4   | 12  | 120159958 | T   | 393 | 0.88 | 0.37 | 7.2E-01 | T                        | 291 | 0.91 | 0.45 | 8.3E-01 | T             | 281 | 0.88 | 0.47 | 7.8E-01 |
| rs165599   | COMT    | 22  | 18336781  | G   | 383 | 1.31 | 0.16 | 8.5E-02 | G                        | 284 | 1.28 | 0.19 | 1.8E-01 | G             | 272 | 1.31 | 0.19 | 1.7E-01 |
| rs16567    | ACCN1   | 17  | 28376537  | T   | 394 | 0.96 | 0.14 | 7.7E-01 | T                        | 292 | 0.92 | 0.17 | 6.3E-01 | T             | 281 | 0.93 | 0.18 | 6.7E-01 |
| rs165774   | COMT    | 22  | 18332561  | A   | 392 | 0.70 | 0.15 | 1.7E-02 | A                        | 290 | 0.58 | 0.19 | 4.6E-03 | A             | 279 | 0.85 | 0.19 | 3.9E-01 |
| rs1662699  | NTRK2   | 9   | 86601564  | T   | 394 | 1.10 | 0.18 | 6.0E-01 | T                        | 292 | 0.91 | 0.22 | 6.8E-01 | T             | 281 | 1.29 | 0.22 | 2.4E-01 |
| rs1672466  | PLA2G4B | 15  | 39923280  | C   | 375 | 0.85 | 0.18 | 3.6E-01 | C                        | 277 | 0.80 | 0.22 | 3.1E-01 | C             | 265 | 0.79 | 0.23 | 3.0E-01 |
| rs167770   | DRD3    | 3   | 115362252 | G   | 394 | 0.92 | 0.15 | 5.9E-01 | G                        | 292 | 1.06 | 0.19 | 7.8E-01 | G             | 281 | 0.82 | 0.20 | 3.2E-01 |
| rs1681506  | NOS1    | 12  | 116259961 | C   | 394 | 0.84 | 0.15 | 2.5E-01 | C                        | 292 | 0.65 | 0.18 | 1.9E-02 | C             | 281 | 1.03 | 0.18 | 8.7E-01 |
| rs16824558 | MME     | 3   | 156294651 | A   | 394 | 0.93 | 0.37 | 8.5E-01 | A                        | 292 | 1.03 | 0.42 | 9.4E-01 | A             | 281 | 0.75 | 0.49 | 5.6E-01 |
| rs16843684 | GRK4    | 4   | 2935474   | T   | 382 | 1.15 | 0.16 | 3.6E-01 | T                        | 283 | 1.09 | 0.19 | 6.6E-01 | T             | 275 | 1.15 | 0.19 | 4.7E-01 |
| rs16850532 | SCN2A   | 2   | 165937495 | A   | 394 | 0.90 | 0.15 | 4.9E-01 | A                        | 292 | 1.06 | 0.19 | 7.7E-01 | A             | 281 | 0.78 | 0.20 | 2.1E-01 |
| rs16851799 | SCN9A   | 2   | 166794660 | T   | 394 | 0.96 | 0.15 | 7.7E-01 | T                        | 292 | 0.84 | 0.19 | 3.4E-01 | T             | 281 | 1.14 | 0.18 | 4.7E-01 |
| rs16859826 | GABRA4  | 4   | 46687489  | C   | 394 | 0.79 | 0.26 | 3.7E-01 | C                        | 292 | 0.88 | 0.31 | 6.6E-01 | C             | 281 | 0.67 | 0.35 | 2.5E-01 |
| rs16860198 | GABRB1  | 4   | 47110569  | G   | 393 | 0.78 | 0.16 | 1.2E-01 | G                        | 291 | 0.96 | 0.19 | 8.5E-01 | G             | 281 | 0.60 | 0.22 | 1.8E-02 |
| rs16870224 | PTGER4  | 5   | 40728697  | A   | 394 | 0.80 | 0.24 | 3.5E-01 | A                        | 292 | 0.94 | 0.28 | 8.1E-01 | A             | 281 | 0.65 | 0.32 | 1.8E-01 |
| rs16873373 | RUNX2   | 6   | 45443679  | G   | 394 | 1.04 | 0.21 | 8.4E-01 | G                        | 292 | 1.42 | 0.24 | 1.6E-01 | G             | 281 | 0.75 | 0.29 | 3.3E-01 |
| rs16873379 | RUNX2   | 6   | 45447829  | C   | 393 | 1.01 | 0.21 | 9.8E-01 | C                        | 292 | 1.42 | 0.24 | 1.6E-01 | C             | 280 | 0.66 | 0.31 | 1.8E-01 |
| rs16877243 | AIM     | 4   | 25177016  | T   | 394 | 0.79 | 0.17 | 1.7E-01 | T                        | 292 | 0.81 | 0.21 | 3.0E-01 | T             | 281 | 0.78 | 0.23 | 2.7E-01 |
| rs16913257 | PRKG1   | 10  | 52483739  | C   | 394 | 1.07 | 0.17 | 6.8E-01 | C                        | 292 | 1.20 | 0.20 | 3.8E-01 | C             | 281 | 0.98 | 0.21 | 9.4E-01 |
| rs16920581 | PENK    | 8   | 57516084  | C   | 394 | 1.09 | 0.16 | 5.8E-01 | C                        | 292 | 0.92 | 0.19 | 6.6E-01 | C             | 281 | 1.29 | 0.20 | 1.9E-01 |
| rs1693863  | CALM2   | 2   | 47263418  | C   | 394 | 1.45 | 0.17 | 3.0E-02 | C                        | 292 | 1.72 | 0.20 | 6.8E-03 | C             | 281 | 1.10 | 0.22 | 6.7E-01 |
| rs16940674 | CRHR1   | 17  | 41266288  | T   | 392 | 0.78 | 0.18 | 1.8E-01 | T                        | 290 | 0.77 | 0.22 | 2.3E-01 | T             | 280 | 0.84 | 0.23 | 4.4E-01 |
| rs16941328 | NTRK3   | 15  | 86492235  | A   | 394 | 1.15 | 0.20 | 4.8E-01 | A                        | 292 | 1.30 | 0.23 | 2.5E-01 | A             | 281 | 0.85 | 0.27 | 5.7E-01 |
| rs16941331 | NTRK3   | 15  | 86494637  | C   | 394 | 0.68 | 0.17 | 2.1E-02 | C                        | 292 | 0.65 | 0.20 | 3.4E-02 | C             | 281 | 0.68 | 0.22 | 7.6E-02 |
| rs16944    | IL1B    | 2   | 113311338 | A   | 394 | 0.96 | 0.16 | 8.1E-01 | A                        | 292 | 1.00 | 0.18 | 9.9E-01 | A             | 281 | 0.96 | 0.20 | 8.6E-01 |
| rs169596   | XDH     | 2   | 31419628  | A   | 394 | 0.91 | 0.15 | 5.5E-01 | A                        | 292 | 0.95 | 0.18 | 7.7E-01 | A             | 281 | 0.88 | 0.19 | 5.2E-01 |
| rs16965199 | PPP1R1B | 17  | 35042266  | G   | 393 | 1.77 | 0.64 | 3.7E-01 | G                        | 291 | 1.82 | 0.83 | 4.7E-01 | G             | 280 | 2.76 | 0.77 | 1.9E-01 |
| rs16967974 | ACCN1   | 17  | 28402898  | G   | 392 | 1.14 | 0.16 | 4.2E-01 | G                        | 290 | 1.30 | 0.19 | 1.7E-01 | G             | 280 | 0.95 | 0.21 | 8.1E-01 |

| SNP        | GENE     | CHR | BP        | TMD |     |      |      |         | TMD with widespread pain |     |      |      |         | Localized TMD |     |      |      |         |
|------------|----------|-----|-----------|-----|-----|------|------|---------|--------------------------|-----|------|------|---------|---------------|-----|------|------|---------|
|            |          |     |           | A1  | N   | OR   | SE   | P       | A1                       | N   | OR   | SE   | P       | A1            | N   | OR   | SE   | P       |
| rs16968020 | ACCN1    | 17  | 28461828  | A   | 394 | 0.94 | 0.18 | 7.2E-01 | A                        | 292 | 1.09 | 0.21 | 6.7E-01 | A             | 281 | 0.76 | 0.24 | 2.5E-01 |
| rs16969968 | CHRNA5   | 15  | 76669980  | A   | 394 | 1.12 | 0.15 | 4.6E-01 | A                        | 292 | 1.01 | 0.18 | 9.5E-01 | A             | 281 | 1.24 | 0.19 | 2.5E-01 |
| rs1698042  | AIM      | 3   | 118667838 | G   | 394 | 0.92 | 0.29 | 7.7E-01 | G                        | 292 | 0.77 | 0.38 | 5.0E-01 | G             | 281 | 1.15 | 0.35 | 7.0E-01 |
| rs1699138  | TRPV3    | 17  | 3399068   | T   | 393 | 0.78 | 0.16 | 1.3E-01 | T                        | 291 | 0.90 | 0.20 | 5.7E-01 | T             | 280 | 0.67 | 0.21 | 6.1E-02 |
| rs1701004  | APP      | 21  | 26273261  | T   | 393 | 0.99 | 0.17 | 9.7E-01 | T                        | 291 | 0.91 | 0.20 | 6.3E-01 | T             | 281 | 1.15 | 0.20 | 5.0E-01 |
| rs17011368 | XDH      | 2   | 31444421  | C   | 394 | 1.24 | 0.46 | 6.5E-01 | C                        | 292 | 1.88 | 0.49 | 1.9E-01 | C             | 281 | 0.44 | 0.79 | 3.0E-01 |
| rs17036320 | CALM2    | 2   | 47240691  | C   | 394 | 1.24 | 0.23 | 3.6E-01 | C                        | 292 | 1.29 | 0.26 | 3.4E-01 | C             | 281 | 1.10 | 0.29 | 7.4E-01 |
| rs170364   | CX3CL1   | 16  | 55967435  | T   | 394 | 1.14 | 0.16 | 3.9E-01 | T                        | 292 | 0.88 | 0.19 | 5.1E-01 | T             | 281 | 1.41 | 0.19 | 7.3E-02 |
| rs17058952 | PNOC     | 8   | 28230273  | G   | 392 | 1.23 | 0.16 | 2.0E-01 | G                        | 290 | 1.16 | 0.19 | 4.4E-01 | G             | 281 | 1.30 | 0.20 | 2.0E-01 |
| rs17060857 | PPP3CC   | 8   | 22353794  | A   | 394 | 1.47 | 0.33 | 2.5E-01 | A                        | 292 | 1.59 | 0.39 | 2.3E-01 | A             | 281 | 1.35 | 0.41 | 4.6E-01 |
| rs17061477 | TAAR5    | 6   | 132952963 | C   | 394 | 1.06 | 0.24 | 8.1E-01 | C                        | 292 | 1.10 | 0.28 | 7.4E-01 | C             | 281 | 0.95 | 0.31 | 8.7E-01 |
| rs17068986 | HTR2A    | 13  | 46314387  | T   | 394 | 1.03 | 0.22 | 9.1E-01 | T                        | 292 | 0.79 | 0.29 | 4.1E-01 | T             | 281 | 1.22 | 0.26 | 4.5E-01 |
| rs1709183  | ESR1     | 6   | 152235689 | C   | 388 | 0.91 | 0.16 | 5.7E-01 | C                        | 287 | 0.88 | 0.19 | 5.3E-01 | C             | 277 | 0.92 | 0.20 | 6.7E-01 |
| rs17098707 | GRK5     | 10  | 121076087 | T   | 394 | 1.21 | 0.61 | 7.6E-01 | T                        | 292 | 0.36 | 1.10 | 3.5E-01 | T             | 281 | 2.08 | 0.65 | 2.6E-01 |
| rs17099141 | HIF1A    | 14  | 61263992  | A   | 394 | 0.81 | 0.46 | 6.5E-01 | A                        | 292 | 0.48 | 0.66 | 2.7E-01 | A             | 281 | 1.11 | 0.52 | 8.4E-01 |
| rs17108817 | ADRB2    | 5   | 148196095 | T   | 394 | 0.82 | 0.14 | 1.5E-01 | T                        | 292 | 0.80 | 0.17 | 1.8E-01 | T             | 281 | 0.82 | 0.17 | 2.5E-01 |
| rs17110747 | TPH2     | 12  | 70712221  | A   | 394 | 0.86 | 0.18 | 4.1E-01 | A                        | 292 | 0.91 | 0.22 | 6.8E-01 | A             | 281 | 0.83 | 0.24 | 4.3E-01 |
| rs17112186 | LIPM     | 10  | 90475349  | G   | 393 | 0.88 | 0.35 | 7.2E-01 | G                        | 291 | 0.83 | 0.45 | 6.8E-01 | G             | 280 | 0.95 | 0.43 | 9.0E-01 |
| rs17115113 | PRKD1    | 14  | 29174761  | C   | 394 | 1.08 | 0.15 | 6.0E-01 | C                        | 292 | 1.09 | 0.19 | 6.4E-01 | C             | 281 | 1.04 | 0.19 | 8.2E-01 |
| rs17116138 | HTR3B    | 11  | 113308876 | A   | 393 | 1.27 | 0.49 | 6.2E-01 | A                        | 291 | 0.45 | 0.80 | 3.1E-01 | A             | 281 | 2.12 | 0.52 | 1.5E-01 |
| rs17131308 | PRKACB   | 1   | 84475062  | T   | 394 | 1.57 | 0.27 | 9.3E-02 | T                        | 292 | 1.78 | 0.30 | 5.6E-02 | T             | 281 | 1.28 | 0.34 | 4.7E-01 |
| rs17155680 | CACNA2D1 | 7   | 81415608  | C   | 394 | 0.83 | 0.17 | 2.8E-01 | C                        | 292 | 1.03 | 0.20 | 8.9E-01 | C             | 281 | 0.62 | 0.24 | 4.6E-02 |
| rs1716167  | AIM      | 12  | 122217115 | A   | 393 | 1.01 | 0.17 | 9.6E-01 | A                        | 291 | 0.89 | 0.21 | 5.9E-01 | A             | 280 | 1.06 | 0.22 | 8.0E-01 |
| rs17172432 | EGFR     | 7   | 55108811  | C   | 394 | 1.07 | 0.18 | 7.2E-01 | C                        | 292 | 1.11 | 0.22 | 6.3E-01 | C             | 281 | 0.98 | 0.23 | 9.2E-01 |
| rs17172630 | CAMK2B   | 7   | 44249453  | A   | 392 | 1.12 | 0.27 | 6.9E-01 | A                        | 290 | 1.00 | 0.33 | 1.0E+00 | A             | 280 | 1.21 | 0.33 | 5.7E-01 |
| rs17179740 | ESR2     | 14  | 63826504  | A   | 390 | 1.04 | 0.14 | 7.6E-01 | A                        | 289 | 1.23 | 0.17 | 2.4E-01 | A             | 279 | 0.90 | 0.18 | 5.6E-01 |
| rs171798   | SLC6A2   | 16  | 54302005  | C   | 394 | 1.07 | 0.19 | 7.1E-01 | C                        | 292 | 1.14 | 0.23 | 5.6E-01 | C             | 281 | 1.03 | 0.24 | 8.9E-01 |
| rs1718119  | P2RX7    | 12  | 120099486 | A   | 394 | 1.01 | 0.15 | 9.4E-01 | A                        | 292 | 1.19 | 0.18 | 3.3E-01 | A             | 281 | 0.87 | 0.19 | 4.7E-01 |
| rs1718136  | P2RX7    | 12  | 120093991 | G   | 394 | 1.01 | 0.15 | 9.4E-01 | G                        | 292 | 1.20 | 0.18 | 3.0E-01 | G             | 281 | 0.86 | 0.19 | 4.4E-01 |
| rs17182402 | MPDZ     | 9   | 13234220  | G   | 392 | 1.09 | 0.20 | 6.8E-01 | G                        | 290 | 1.18 | 0.24 | 5.0E-01 | G             | 280 | 0.92 | 0.26 | 7.5E-01 |
| rs17182714 | SCN2A    | 2   | 165803783 | G   | 391 | 1.10 | 0.20 | 6.3E-01 | G                        | 289 | 0.92 | 0.25 | 7.5E-01 | G             | 278 | 1.30 | 0.24 | 2.7E-01 |
| rs17189401 | PPP3R2   | 9   | 103393143 | G   | 394 | 0.94 | 0.18 | 7.3E-01 | G                        | 292 | 1.03 | 0.21 | 8.7E-01 | G             | 281 | 0.87 | 0.23 | 5.4E-01 |
| rs1719153  | CCL4     | 17  | 31457342  | T   | 394 | 1.14 | 0.17 | 4.5E-01 | T                        | 292 | 1.06 | 0.20 | 7.7E-01 | T             | 281 | 1.26 | 0.21 | 2.6E-01 |
| rs1719982  | AIM      | 18  | 5598808   | T   | 393 | 0.88 | 0.15 | 3.8E-01 | T                        | 291 | 0.88 | 0.18 | 4.7E-01 | T             | 280 | 0.91 | 0.19 | 6.5E-01 |
| rs17203281 | DLG4     | 17  | 7040535   | A   | 393 | 1.04 | 0.16 | 7.9E-01 | A                        | 291 | 1.34 | 0.19 | 1.2E-01 | A             | 280 | 0.78 | 0.21 | 2.3E-01 |
| rs1722883  | AKR1B10  | 7   | 133865943 | C   | 394 | 0.83 | 0.14 | 1.8E-01 | C                        | 292 | 1.01 | 0.17 | 9.3E-01 | C             | 281 | 0.70 | 0.18 | 4.2E-02 |
| rs1723482  | CALM2    | 2   | 47260043  | C   | 390 | 1.39 | 0.21 | 1.1E-01 | C                        | 289 | 1.77 | 0.24 | 1.7E-02 | C             | 277 | 0.98 | 0.28 | 9.4E-01 |
| rs17244555 | P2RY2    | 11  | 72623956  | A   | 393 | 0.65 | 0.42 | 3.0E-01 | A                        | 291 | 0.96 | 0.46 | 9.2E-01 | A             | 280 | 0.25 | 0.76 | 7.1E-02 |
| rs17304901 | NPY2R    | 4   | 156357822 | A   | 394 | 1.10 | 0.16 | 5.3E-01 | A                        | 292 | 1.00 | 0.19 | 9.9E-01 | A             | 281 | 1.16 | 0.19 | 4.4E-01 |

| SNP        | GENE   | CHR | BP        | TMD |     |      |      |         | TMD with widespread pain |     |      |      |         | Localized TMD |     |      |      |         |
|------------|--------|-----|-----------|-----|-----|------|------|---------|--------------------------|-----|------|------|---------|---------------|-----|------|------|---------|
|            |        |     |           | A1  | N   | OR   | SE   | P       | A1                       | N   | OR   | SE   | P       | A1            | N   | OR   | SE   | P       |
| rs17323225 | XDH    | 2   | 31446769  | C   | 394 | 1.24 | 0.46 | 6.5E-01 | C                        | 292 | 1.88 | 0.49 | 1.9E-01 | C             | 281 | 0.44 | 0.79 | 3.0E-01 |
| rs17349080 | LIPM   | 10  | 90492394  | T   | 394 | 1.77 | 0.41 | 1.7E-01 | T                        | 292 | 2.11 | 0.46 | 1.0E-01 | T             | 281 | 1.23 | 0.53 | 7.0E-01 |
| rs17381194 | ATP2B1 | 12  | 88535226  | C   | 394 | 0.81 | 0.20 | 3.1E-01 | C                        | 292 | 0.61 | 0.27 | 6.8E-02 | C             | 281 | 1.08 | 0.25 | 7.6E-01 |
| rs17416172 | ERBB4  | 2   | 212683073 | T   | 393 | 0.98 | 0.14 | 8.9E-01 | T                        | 291 | 1.06 | 0.17 | 7.3E-01 | T             | 280 | 0.96 | 0.18 | 8.0E-01 |
| rs17426222 | ADRA1A | 8   | 26773734  | T   | 394 | 0.84 | 0.16 | 2.9E-01 | T                        | 292 | 0.98 | 0.19 | 9.3E-01 | T             | 281 | 0.79 | 0.21 | 2.6E-01 |
| rs17434481 | LIPM   | 10  | 90507130  | T   | 394 | 1.77 | 0.41 | 1.7E-01 | T                        | 292 | 2.11 | 0.46 | 1.0E-01 | T             | 281 | 1.23 | 0.53 | 7.0E-01 |
| rs17442808 | MME    | 3   | 156290571 | A   | 394 | 0.82 | 0.16 | 2.3E-01 | A                        | 292 | 0.76 | 0.20 | 1.6E-01 | A             | 281 | 0.83 | 0.20 | 3.6E-01 |
| rs17464221 | CALCRL | 2   | 187986448 | T   | 393 | 0.89 | 0.15 | 4.3E-01 | T                        | 291 | 0.76 | 0.19 | 1.5E-01 | T             | 281 | 1.00 | 0.19 | 9.8E-01 |
| rs174697   | COMT   | 22  | 18333832  | A   | 394 | 1.84 | 0.38 | 1.1E-01 | A                        | 292 | 1.63 | 0.43 | 2.6E-01 | A             | 281 | 1.94 | 0.46 | 1.5E-01 |
| rs17478710 | GRIA4  | 11  | 105143352 | G   | 393 | 1.19 | 0.15 | 2.6E-01 | G                        | 291 | 1.10 | 0.19 | 6.2E-01 | G             | 280 | 1.26 | 0.19 | 2.1E-01 |
| rs17486278 | CHRNA5 | 15  | 76654537  | C   | 391 | 1.09 | 0.15 | 5.7E-01 | C                        | 290 | 0.98 | 0.18 | 9.3E-01 | C             | 279 | 1.21 | 0.19 | 3.1E-01 |
| rs17509759 | PRKG1  | 10  | 52445050  | T   | 394 | 1.03 | 0.16 | 8.7E-01 | T                        | 292 | 0.96 | 0.19 | 8.3E-01 | T             | 281 | 1.08 | 0.20 | 6.9E-01 |
| rs17525809 | P2RX7  | 12  | 120077072 | C   | 394 | 0.92 | 0.29 | 7.7E-01 | C                        | 292 | 1.04 | 0.34 | 9.1E-01 | C             | 281 | 0.77 | 0.38 | 4.9E-01 |
| rs17534202 | BTG2   | 1   | 201547798 | G   | 394 | 0.92 | 0.15 | 6.0E-01 | G                        | 292 | 0.96 | 0.18 | 8.1E-01 | G             | 281 | 0.86 | 0.19 | 4.4E-01 |
| rs17540656 | NGF    | 1   | 115681655 | G   | 392 | 1.03 | 0.15 | 8.5E-01 | G                        | 291 | 1.03 | 0.17 | 8.7E-01 | G             | 280 | 1.02 | 0.18 | 9.4E-01 |
| rs17561    | IL1A   | 2   | 113253694 | A   | 394 | 1.06 | 0.15 | 7.0E-01 | A                        | 292 | 1.14 | 0.19 | 4.9E-01 | A             | 281 | 0.99 | 0.20 | 9.6E-01 |
| rs17566896 | KCNJ3  | 2   | 155367210 | C   | 394 | 0.99 | 0.15 | 9.4E-01 | C                        | 292 | 1.12 | 0.18 | 5.5E-01 | C             | 281 | 0.87 | 0.20 | 4.8E-01 |
| rs17574    | DPP4   | 2   | 162638225 | G   | 394 | 0.91 | 0.15 | 5.0E-01 | G                        | 292 | 0.95 | 0.18 | 7.7E-01 | G             | 281 | 0.92 | 0.19 | 6.4E-01 |
| rs17586159 | MAP2K1 | 15  | 64564399  | A   | 394 | 1.35 | 0.55 | 5.9E-01 | A                        | 292 | 1.85 | 0.64 | 3.4E-01 | A             | 281 | 1.22 | 0.74 | 7.9E-01 |
| rs17586428 | HTR2B  | 2   | 231697099 | G   | 393 | 2.12 | 0.39 | 5.4E-02 | G                        | 291 | 2.09 | 0.46 | 1.0E-01 | G             | 280 | 1.98 | 0.45 | 1.3E-01 |
| rs17599158 | GABRA4 | 4   | 46628747  | C   | 389 | 0.92 | 0.16 | 5.9E-01 | C                        | 287 | 0.77 | 0.20 | 1.9E-01 | C             | 277 | 1.10 | 0.20 | 6.5E-01 |
| rs17619588 | HTR2B  | 2   | 231680419 | G   | 392 | 2.11 | 0.39 | 5.5E-02 | G                        | 290 | 2.08 | 0.46 | 1.1E-01 | G             | 279 | 1.97 | 0.45 | 1.3E-01 |
| rs1763527  | SGK1   | 6   | 134541547 | T   | 392 | 0.95 | 0.13 | 6.9E-01 | T                        | 291 | 1.02 | 0.16 | 8.8E-01 | T             | 279 | 0.87 | 0.17 | 3.9E-01 |
| rs17642086 | KCNJ3  | 2   | 155419603 | C   | 393 | 1.11 | 0.15 | 5.1E-01 | C                        | 291 | 1.28 | 0.18 | 1.7E-01 | C             | 281 | 0.95 | 0.20 | 8.0E-01 |
| rs17647384 | GABRB3 | 15  | 24767263  | A   | 394 | 0.97 | 0.14 | 8.3E-01 | A                        | 292 | 1.08 | 0.17 | 6.4E-01 | A             | 281 | 0.79 | 0.18 | 2.0E-01 |
| rs17689135 | VPS4B  | 18  | 59236106  | A   | 394 | 0.92 | 0.17 | 6.1E-01 | A                        | 292 | 0.94 | 0.20 | 7.6E-01 | A             | 281 | 0.83 | 0.22 | 4.2E-01 |
| rs17689378 | CRHR1  | 17  | 41237571  | T   | 394 | 0.80 | 0.18 | 2.1E-01 | T                        | 292 | 0.79 | 0.22 | 2.8E-01 | T             | 281 | 0.85 | 0.23 | 4.6E-01 |
| rs17695052 | FPR2   | 19  | 56965038  | G   | 394 | 1.20 | 0.24 | 4.7E-01 | G                        | 292 | 1.17 | 0.30 | 5.9E-01 | G             | 281 | 1.26 | 0.30 | 4.5E-01 |
| rs17731664 | NRG1   | 8   | 32705627  | C   | 394 | 1.03 | 0.24 | 9.1E-01 | C                        | 292 | 1.15 | 0.28 | 6.3E-01 | C             | 281 | 0.98 | 0.30 | 9.5E-01 |
| rs17733242 | PPP3CC | 8   | 22441490  | G   | 394 | 0.97 | 0.23 | 9.1E-01 | G                        | 292 | 1.12 | 0.27 | 6.8E-01 | G             | 281 | 0.93 | 0.30 | 8.0E-01 |
| rs17739403 | ETV1   | 7   | 13995490  | T   | 394 | 1.17 | 0.57 | 7.8E-01 | T                        | 292 | 1.37 | 0.77 | 6.9E-01 | T             | 281 | 2.07 | 0.72 | 3.1E-01 |
| rs17763226 | EPHB1  | 3   | 135992886 | C   | 394 | 1.38 | 0.20 | 1.0E-01 | C                        | 292 | 1.27 | 0.23 | 2.9E-01 | C             | 281 | 1.34 | 0.24 | 2.3E-01 |
| rs17804031 | ERBB4  | 2   | 212022553 | T   | 394 | 0.93 | 0.14 | 6.1E-01 | T                        | 292 | 0.75 | 0.18 | 1.1E-01 | T             | 281 | 1.09 | 0.18 | 6.2E-01 |
| rs17834679 | FPR2   | 19  | 56961899  | G   | 393 | 0.92 | 0.16 | 6.1E-01 | G                        | 292 | 0.89 | 0.20 | 5.5E-01 | G             | 280 | 0.96 | 0.20 | 8.5E-01 |
| rs1783596  | P2RY2  | 11  | 72623668  | C   | 392 | 1.27 | 0.14 | 9.2E-02 | C                        | 290 | 1.22 | 0.17 | 2.6E-01 | C             | 280 | 1.36 | 0.17 | 7.5E-02 |
| rs1787337  | KCNJ6  | 21  | 38077824  | A   | 394 | 0.98 | 0.14 | 8.9E-01 | A                        | 292 | 1.07 | 0.17 | 6.9E-01 | A             | 281 | 0.92 | 0.18 | 6.6E-01 |
| rs1794065  | IL1RN  | 2   | 113596204 | A   | 394 | 0.99 | 0.15 | 9.4E-01 | A                        | 292 | 0.98 | 0.18 | 9.0E-01 | A             | 281 | 1.02 | 0.20 | 9.4E-01 |
| rs1799722  | BDKRB2 | 14  | 95740892  | T   | 391 | 0.96 | 0.15 | 7.6E-01 | T                        | 290 | 1.15 | 0.18 | 4.4E-01 | T             | 279 | 0.69 | 0.19 | 4.7E-02 |
| rs1799836  | MAOB   | 23  | 43512943  | C   | 393 | 0.80 | 0.14 | 1.1E-01 | C                        | 291 | 0.86 | 0.17 | 3.6E-01 | C             | 280 | 0.72 | 0.18 | 5.8E-02 |

| SNP       | GENE   | CHR | BP        | TMD |     |      |      |         | TMD with widespread pain |     |      |      |         | Localized TMD |     |      |      |         |
|-----------|--------|-----|-----------|-----|-----|------|------|---------|--------------------------|-----|------|------|---------|---------------|-----|------|------|---------|
|           |        |     |           | A1  | N   | OR   | SE   | P       | A1                       | N   | OR   | SE   | P       | A1            | N   | OR   | SE   | P       |
| rs1799939 | RET    | 10  | 42930125  | A   | 394 | 1.06 | 0.20 | 7.6E-01 | A                        | 292 | 1.08 | 0.24 | 7.5E-01 | A             | 281 | 1.06 | 0.25 | 8.2E-01 |
| rs1799971 | OPRM1  | 6   | 154402490 | G   | 392 | 0.89 | 0.22 | 5.9E-01 | G                        | 291 | 1.15 | 0.25 | 5.8E-01 | G             | 281 | 0.66 | 0.29 | 1.6E-01 |
| rs1799978 | DRD2   | 11  | 112851561 | C   | 394 | 0.83 | 0.30 | 5.5E-01 | C                        | 292 | 0.63 | 0.39 | 2.5E-01 | C             | 281 | 0.97 | 0.36 | 9.3E-01 |
| rs1800499 | DRD2   | 11  | 112792904 | T   | 393 | 1.27 | 0.49 | 6.2E-01 | T                        | 292 | 0.90 | 0.62 | 8.7E-01 | T             | 280 | 1.57 | 0.56 | 4.2E-01 |
| rs1800566 | NQO1   | 16  | 68302646  | A   | 394 | 0.97 | 0.19 | 8.5E-01 | A                        | 292 | 0.78 | 0.24 | 2.8E-01 | A             | 281 | 1.12 | 0.24 | 6.4E-01 |
| rs1800587 | IL1A   | 2   | 113259431 | A   | 393 | 1.07 | 0.15 | 6.8E-01 | A                        | 291 | 1.14 | 0.19 | 4.8E-01 | A             | 280 | 1.00 | 0.20 | 9.8E-01 |
| rs1800629 | TNF    | 6   | 31651010  | A   | 394 | 0.86 | 0.19 | 4.5E-01 | A                        | 292 | 0.89 | 0.23 | 6.2E-01 | A             | 281 | 0.82 | 0.25 | 4.4E-01 |
| rs1800763 | ADRA2A | 10  | 112825982 | T   | 394 | 0.95 | 0.31 | 8.8E-01 | T                        | 292 | 1.43 | 0.33 | 2.8E-01 | T             | 281 | 0.40 | 0.55 | 9.8E-02 |
| rs1800783 | NOS3   | 7   | 150320330 | A   | 393 | 1.02 | 0.14 | 8.7E-01 | A                        | 291 | 0.93 | 0.17 | 6.6E-01 | A             | 280 | 1.07 | 0.17 | 6.9E-01 |
| rs1800797 | IL6    | 7   | 22732746  | A   | 394 | 0.99 | 0.14 | 9.5E-01 | A                        | 292 | 1.03 | 0.17 | 8.8E-01 | A             | 281 | 0.96 | 0.17 | 8.0E-01 |
| rs1800858 | RET    | 10  | 42915974  | A   | 383 | 1.13 | 0.17 | 4.7E-01 | A                        | 282 | 1.05 | 0.21 | 8.1E-01 | A             | 272 | 1.22 | 0.21 | 3.5E-01 |
| rs1800860 | RET    | 10  | 42926693  | A   | 385 | 0.77 | 0.17 | 1.2E-01 | A                        | 285 | 0.78 | 0.20 | 2.1E-01 | A             | 273 | 0.85 | 0.21 | 4.2E-01 |
| rs1800863 | RET    | 10  | 42935639  | G   | 391 | 1.06 | 0.20 | 7.6E-01 | G                        | 289 | 1.10 | 0.24 | 7.0E-01 | G             | 278 | 1.04 | 0.25 | 8.9E-01 |
| rs1800871 | IL10   | 1   | 205013257 | A   | 394 | 1.07 | 0.17 | 6.8E-01 | A                        | 292 | 1.16 | 0.20 | 4.6E-01 | A             | 281 | 1.09 | 0.21 | 6.7E-01 |
| rs1800879 | NTRK1  | 1   | 155104765 | T   | 393 | 1.16 | 0.14 | 2.9E-01 | T                        | 292 | 1.21 | 0.17 | 2.6E-01 | T             | 280 | 1.09 | 0.18 | 6.3E-01 |
| rs1800888 | ADRB2  | 5   | 148187078 | T   | 394 | 0.74 | 0.55 | 5.9E-01 | T                        | 292 | 1.03 | 0.64 | 9.6E-01 | T             | 281 | 0.57 | 0.81 | 4.9E-01 |
| rs1800896 | IL10   | 1   | 205013520 | C   | 394 | 0.76 | 0.15 | 6.6E-02 | C                        | 292 | 0.77 | 0.18 | 1.4E-01 | C             | 281 | 0.74 | 0.18 | 9.3E-02 |
| rs1800925 | IL13   | 5   | 132020708 | T   | 392 | 0.87 | 0.17 | 4.1E-01 | T                        | 290 | 0.82 | 0.21 | 3.5E-01 | T             | 280 | 0.95 | 0.21 | 8.1E-01 |
| rs1801058 | GRK4   | 4   | 3008948   | T   | 394 | 1.13 | 0.14 | 3.9E-01 | T                        | 292 | 1.06 | 0.18 | 7.5E-01 | T             | 281 | 1.12 | 0.18 | 5.2E-01 |
| rs1801131 | MTHFR  | 1   | 11777063  | G   | 387 | 1.08 | 0.16 | 6.5E-01 | G                        | 286 | 1.13 | 0.19 | 5.2E-01 | G             | 277 | 1.00 | 0.20 | 9.8E-01 |
| rs1801132 | ESR1   | 6   | 152307215 | G   | 394 | 0.93 | 0.17 | 6.6E-01 | G                        | 292 | 0.83 | 0.22 | 4.0E-01 | G             | 281 | 1.00 | 0.21 | 1.0E+00 |
| rs1801133 | MTHFR  | 1   | 11778965  | A   | 393 | 0.86 | 0.15 | 3.1E-01 | A                        | 291 | 0.76 | 0.19 | 1.6E-01 | A             | 281 | 0.97 | 0.19 | 8.7E-01 |
| rs1801412 | HTR2C  | 23  | 114048960 | G   | 394 | 1.81 | 0.28 | 3.6E-02 | G                        | 292 | 2.10 | 0.33 | 2.2E-02 | G             | 281 | 1.69 | 0.35 | 1.4E-01 |
| rs1803898 | ACSL1  | 4   | 185938543 | T   | 390 | 0.94 | 0.16 | 7.1E-01 | T                        | 288 | 1.06 | 0.19 | 7.7E-01 | T             | 280 | 0.74 | 0.21 | 1.4E-01 |
| rs1805002 | CCKBR  | 11  | 6247696   | A   | 394 | 1.37 | 0.36 | 3.8E-01 | A                        | 292 | 1.16 | 0.43 | 7.3E-01 | A             | 281 | 1.50 | 0.44 | 3.5E-01 |
| rs1805055 | HTR2A  | 13  | 46367969  | T   | 394 | 0.59 | 0.53 | 3.1E-01 | T                        | 292 | 0.19 | 1.06 | 1.2E-01 | T             | 281 | 1.13 | 0.57 | 8.3E-01 |
| rs1805124 | SCN5A  | 3   | 38620424  | C   | 392 | 1.23 | 0.17 | 2.1E-01 | C                        | 291 | 1.28 | 0.20 | 2.2E-01 | C             | 279 | 1.15 | 0.21 | 5.1E-01 |
| rs1805126 | SCN5A  | 3   | 38567410  | G   | 394 | 0.86 | 0.15 | 3.1E-01 | G                        | 292 | 0.80 | 0.18 | 2.2E-01 | G             | 281 | 0.87 | 0.18 | 4.5E-01 |
| rs1805420 | FMR1   | 23  | 146799998 | G   | 393 | 0.93 | 0.36 | 8.5E-01 | G                        | 291 | 1.20 | 0.41 | 6.6E-01 | G             | 280 | 0.68 | 0.51 | 4.5E-01 |
| rs1805474 | GRIN2B | 12  | 13633417  | T   | 394 | 0.97 | 0.17 | 8.7E-01 | T                        | 292 | 0.92 | 0.20 | 6.8E-01 | T             | 281 | 0.97 | 0.21 | 8.9E-01 |
| rs1806516 | P2RY6  | 11  | 72681701  | C   | 392 | 0.89 | 0.15 | 4.4E-01 | C                        | 291 | 0.97 | 0.18 | 8.8E-01 | C             | 280 | 0.79 | 0.19 | 2.3E-01 |
| rs1806572 | GLRB   | 4   | 158256839 | C   | 394 | 1.10 | 0.19 | 6.3E-01 | C                        | 292 | 1.28 | 0.23 | 2.7E-01 | C             | 281 | 0.88 | 0.24 | 6.1E-01 |
| rs1810132 | ERBB2  | 17  | 35119531  | C   | 394 | 0.76 | 0.16 | 7.5E-02 | C                        | 292 | 0.90 | 0.19 | 5.8E-01 | C             | 281 | 0.65 | 0.21 | 3.8E-02 |
| rs1811510 | AIM    | 3   | 5750231   | T   | 393 | 0.82 | 0.36 | 5.8E-01 | T                        | 291 | 0.57 | 0.49 | 2.6E-01 | T             | 280 | 1.13 | 0.42 | 7.7E-01 |
| rs1820577 | HNRNPD | 4   | 83497802  | C   | 393 | 0.98 | 0.18 | 8.9E-01 | C                        | 291 | 0.94 | 0.22 | 7.6E-01 | C             | 281 | 1.03 | 0.22 | 8.9E-01 |
| rs1822420 | NTRK2  | 9   | 86657096  | T   | 394 | 0.98 | 0.22 | 9.1E-01 | T                        | 292 | 1.42 | 0.24 | 1.5E-01 | T             | 281 | 0.57 | 0.32 | 8.3E-02 |
| rs1823001 | KCNJ3  | 2   | 155322526 | T   | 393 | 0.83 | 0.14 | 1.9E-01 | T                        | 291 | 0.75 | 0.18 | 9.5E-02 | T             | 281 | 0.93 | 0.18 | 7.0E-01 |
| rs1823003 | KCNJ3  | 2   | 155311726 | T   | 393 | 0.97 | 0.15 | 8.6E-01 | T                        | 291 | 1.09 | 0.19 | 6.4E-01 | T             | 281 | 0.82 | 0.19 | 3.2E-01 |
| rs1823778 | AIM    | 18  | 65752616  | G   | 394 | 1.27 | 0.22 | 2.8E-01 | G                        | 292 | 1.39 | 0.25 | 1.9E-01 | G             | 281 | 1.07 | 0.29 | 8.1E-01 |

| SNP       | GENE    | CHR | BP        | TMD |     |      |      |         | TMD with widespread pain |     |      |      |         | Localized TMD |     |      |      |         |
|-----------|---------|-----|-----------|-----|-----|------|------|---------|--------------------------|-----|------|------|---------|---------------|-----|------|------|---------|
|           |         |     |           | A1  | N   | OR   | SE   | P       | A1                       | N   | OR   | SE   | P       | A1            | N   | OR   | SE   | P       |
| rs1824024 | CHRM2   | 7   | 136294234 | C   | 389 | 1.42 | 0.16 | 2.4E-02 | C                        | 289 | 1.24 | 0.19 | 2.4E-01 | C             | 277 | 1.64 | 0.19 | 1.0E-02 |
| rs182637  | TRPV1   | 17  | 3456581   | T   | 392 | 1.23 | 0.15 | 1.8E-01 | T                        | 292 | 1.39 | 0.18 | 7.3E-02 | T             | 279 | 1.03 | 0.19 | 8.7E-01 |
| rs1826532 | GRIA1   | 5   | 152880879 | T   | 394 | 0.91 | 0.17 | 6.0E-01 | T                        | 292 | 1.03 | 0.21 | 8.8E-01 | T             | 281 | 0.95 | 0.23 | 8.1E-01 |
| rs1827950 | AIM     | 4   | 117317931 | G   | 394 | 1.06 | 0.19 | 7.7E-01 | G                        | 292 | 0.91 | 0.24 | 7.0E-01 | G             | 281 | 1.15 | 0.24 | 5.4E-01 |
| rs1828774 | AIM     | 15  | 26812205  | G   | 394 | 0.91 | 0.14 | 4.8E-01 | G                        | 292 | 0.90 | 0.17 | 5.2E-01 | G             | 281 | 0.91 | 0.18 | 5.8E-01 |
| rs1836914 | MME     | 3   | 156279054 | C   | 394 | 0.79 | 0.49 | 6.3E-01 | C                        | 292 | 0.82 | 0.57 | 7.3E-01 | C             | 281 | 0.70 | 0.64 | 5.8E-01 |
| rs1851426 | CYP3A4  | 7   | 99220872  | A   | 394 | 1.76 | 0.49 | 2.5E-01 | A                        | 292 | 2.45 | 0.52 | 8.5E-02 | A             | 281 | 0.86 | 0.70 | 8.3E-01 |
| rs1861647 | SLC6A2  | 16  | 54285907  | A   | 394 | 1.03 | 0.14 | 8.3E-01 | A                        | 292 | 1.03 | 0.17 | 8.6E-01 | A             | 281 | 1.04 | 0.18 | 8.3E-01 |
| rs1862262 | CACNA1A | 19  | 13425687  | T   | 394 | 0.84 | 0.18 | 3.2E-01 | T                        | 292 | 0.77 | 0.22 | 2.5E-01 | T             | 281 | 0.86 | 0.23 | 5.0E-01 |
| rs1864205 | GRIA1   | 5   | 152865023 | C   | 394 | 0.95 | 0.15 | 7.6E-01 | C                        | 292 | 0.97 | 0.18 | 8.6E-01 | C             | 281 | 0.91 | 0.19 | 6.3E-01 |
| rs1864213 | SLC1A3  | 5   | 36663526  | G   | 394 | 1.00 | 0.15 | 1.0E+00 | G                        | 292 | 0.95 | 0.18 | 7.9E-01 | G             | 281 | 1.05 | 0.18 | 7.9E-01 |
| rs1865033 | CACNA1A | 19  | 13193467  | A   | 394 | 0.74 | 0.20 | 1.2E-01 | A                        | 292 | 0.80 | 0.24 | 3.5E-01 | A             | 281 | 0.64 | 0.25 | 8.1E-02 |
| rs1866989 | GABRB1  | 4   | 46795862  | T   | 394 | 1.05 | 0.15 | 7.7E-01 | T                        | 292 | 1.07 | 0.18 | 7.0E-01 | T             | 281 | 1.03 | 0.19 | 8.7E-01 |
| rs1868402 | PPP3R1  | 2   | 68262541  | G   | 394 | 1.06 | 0.16 | 6.9E-01 | G                        | 292 | 0.97 | 0.19 | 8.9E-01 | G             | 281 | 1.20 | 0.20 | 3.5E-01 |
| rs1869237 | AIM     | 10  | 33876047  | G   | 394 | 0.79 | 0.15 | 1.1E-01 | G                        | 292 | 0.92 | 0.18 | 6.5E-01 | G             | 281 | 0.69 | 0.19 | 5.1E-02 |
| rs1872688 | ADCY7   | 16  | 48874578  | T   | 394 | 0.85 | 0.15 | 2.9E-01 | T                        | 292 | 0.79 | 0.19 | 2.1E-01 | T             | 281 | 0.92 | 0.19 | 6.4E-01 |
| rs1872691 | ADCY7   | 16  | 48907711  | A   | 394 | 1.02 | 0.19 | 9.2E-01 | A                        | 292 | 1.04 | 0.24 | 8.6E-01 | A             | 281 | 1.15 | 0.23 | 5.4E-01 |
| rs1873905 | GRIA1   | 5   | 152914816 | T   | 394 | 1.11 | 0.15 | 4.7E-01 | T                        | 292 | 1.15 | 0.18 | 4.3E-01 | T             | 281 | 1.09 | 0.18 | 6.4E-01 |
| rs1873910 | GRIA1   | 5   | 152981745 | T   | 394 | 0.99 | 0.16 | 9.4E-01 | T                        | 292 | 1.08 | 0.19 | 6.8E-01 | T             | 281 | 0.85 | 0.20 | 4.3E-01 |
| rs1874142 | ADORA1  | 1   | 201361029 | A   | 392 | 1.05 | 0.14 | 7.2E-01 | A                        | 290 | 0.94 | 0.18 | 7.3E-01 | A             | 280 | 1.17 | 0.18 | 3.8E-01 |
| rs1874425 | ADRA1A  | 8   | 26701403  | T   | 394 | 0.96 | 0.16 | 8.1E-01 | T                        | 292 | 0.93 | 0.19 | 7.2E-01 | T             | 281 | 0.97 | 0.20 | 9.0E-01 |
| rs1875999 | CRHBP   | 5   | 76300738  | C   | 394 | 0.85 | 0.15 | 2.9E-01 | C                        | 292 | 0.82 | 0.19 | 3.1E-01 | C             | 281 | 0.95 | 0.19 | 7.7E-01 |
| rs1876267 | PPP3CA  | 4   | 102248524 | T   | 391 | 0.86 | 0.14 | 3.0E-01 | T                        | 289 | 0.94 | 0.17 | 7.4E-01 | T             | 278 | 0.73 | 0.18 | 9.4E-02 |
| rs1881597 | PRKG1   | 10  | 53723823  | T   | 391 | 1.03 | 0.16 | 8.5E-01 | T                        | 290 | 1.16 | 0.19 | 4.3E-01 | T             | 278 | 0.90 | 0.20 | 6.1E-01 |
| rs1882766 | RUNX1   | 21  | 35733029  | T   | 394 | 0.79 | 0.16 | 1.5E-01 | T                        | 292 | 0.77 | 0.20 | 2.0E-01 | T             | 281 | 0.77 | 0.20 | 1.9E-01 |
| rs1884052 | ESR1    | 6   | 152333059 | G   | 392 | 1.07 | 0.20 | 7.3E-01 | G                        | 290 | 0.98 | 0.25 | 9.5E-01 | G             | 279 | 1.14 | 0.25 | 6.1E-01 |
| rs1884725 | XDH     | 2   | 31425290  | A   | 394 | 1.36 | 0.17 | 7.5E-02 | A                        | 292 | 1.53 | 0.20 | 3.8E-02 | A             | 281 | 1.05 | 0.22 | 8.4E-01 |
| rs1885167 | AIM     | 9   | 17504515  | A   | 393 | 0.94 | 0.17 | 7.0E-01 | A                        | 291 | 0.84 | 0.21 | 4.0E-01 | A             | 280 | 1.09 | 0.22 | 6.9E-01 |
| rs1888861 | NTRK1   | 1   | 155064585 | C   | 391 | 1.28 | 0.18 | 1.7E-01 | C                        | 289 | 1.10 | 0.22 | 6.8E-01 | C             | 280 | 1.49 | 0.22 | 7.0E-02 |
| rs1889432 | GRK5    | 10  | 121175991 | G   | 393 | 0.76 | 0.15 | 5.9E-02 | G                        | 291 | 0.68 | 0.19 | 3.7E-02 | G             | 280 | 0.81 | 0.18 | 2.5E-01 |
| rs1897139 | ATP1B3  | 3   | 143088651 | A   | 394 | 0.91 | 0.22 | 6.7E-01 | A                        | 292 | 0.97 | 0.26 | 9.0E-01 | A             | 281 | 0.79 | 0.28 | 4.0E-01 |
| rs1900132 | KCNJ3   | 2   | 155411314 | G   | 394 | 0.94 | 0.16 | 6.8E-01 | G                        | 292 | 0.76 | 0.20 | 1.7E-01 | G             | 281 | 1.07 | 0.20 | 7.3E-01 |
| rs1901362 | YWHAZ   | 8   | 102028785 | A   | 393 | 1.46 | 0.14 | 7.3E-03 | A                        | 292 | 1.60 | 0.17 | 6.0E-03 | A             | 280 | 1.43 | 0.18 | 5.0E-02 |
| rs1905248 | SCN8A   | 12  | 50293270  | A   | 394 | 1.05 | 0.16 | 7.5E-01 | A                        | 292 | 1.04 | 0.20 | 8.4E-01 | A             | 281 | 1.03 | 0.21 | 8.9E-01 |
| rs1916048 | ZFAND6  | 15  | 78199634  | C   | 393 | 0.83 | 0.17 | 2.8E-01 | C                        | 291 | 0.85 | 0.21 | 4.3E-01 | C             | 281 | 0.69 | 0.23 | 1.1E-01 |
| rs192303  | SLC6A2  | 16  | 54257725  | G   | 376 | 0.92 | 0.17 | 6.2E-01 | G                        | 279 | 0.83 | 0.21 | 3.8E-01 | G             | 268 | 1.05 | 0.21 | 8.2E-01 |
| rs1923882 | HTR2A   | 13  | 46309662  | T   | 394 | 0.99 | 0.17 | 9.3E-01 | T                        | 292 | 1.23 | 0.21 | 3.1E-01 | T             | 281 | 0.74 | 0.22 | 1.6E-01 |
| rs1927911 | TLR4    | 9   | 119509875 | A   | 394 | 0.84 | 0.16 | 3.0E-01 | A                        | 292 | 0.87 | 0.20 | 4.9E-01 | A             | 281 | 0.84 | 0.21 | 4.1E-01 |
| rs1934963 | CYP2C9  | 10  | 96724666  | C   | 394 | 1.02 | 0.18 | 9.3E-01 | C                        | 292 | 0.84 | 0.23 | 4.4E-01 | C             | 281 | 1.20 | 0.22 | 4.2E-01 |

| SNP       | GENE    | CHR | BP        | TMD |     |      |      |         | TMD with widespread pain |     |      |      |         | Localized TMD |     |      |      |         |
|-----------|---------|-----|-----------|-----|-----|------|------|---------|--------------------------|-----|------|------|---------|---------------|-----|------|------|---------|
|           |         |     |           | A1  | N   | OR   | SE   | P       | A1                       | N   | OR   | SE   | P       | A1            | N   | OR   | SE   | P       |
| rs1934967 | CYP2C9  | 10  | 96731416  | T   | 394 | 0.83 | 0.17 | 2.8E-01 | T                        | 292 | 0.96 | 0.20 | 8.2E-01 | T             | 281 | 0.78 | 0.22 | 2.5E-01 |
| rs1939826 | GRIA4   | 11  | 105342170 | G   | 391 | 1.02 | 0.18 | 9.1E-01 | G                        | 290 | 0.96 | 0.22 | 8.5E-01 | G             | 280 | 1.10 | 0.23 | 6.6E-01 |
| rs1940964 | GRIA4   | 11  | 105215066 | T   | 394 | 0.69 | 0.18 | 3.6E-02 | T                        | 292 | 0.79 | 0.21 | 2.8E-01 | T             | 281 | 0.58 | 0.25 | 2.4E-02 |
| rs1946892 | SCN3A   | 2   | 165704353 | A   | 394 | 1.11 | 0.14 | 4.5E-01 | A                        | 292 | 1.11 | 0.17 | 5.4E-01 | A             | 281 | 1.12 | 0.17 | 5.0E-01 |
| rs1947195 | PRKCE   | 2   | 45938829  | T   | 394 | 0.95 | 0.22 | 8.3E-01 | T                        | 292 | 0.94 | 0.26 | 8.1E-01 | T             | 281 | 0.92 | 0.27 | 7.5E-01 |
| rs1947364 | KCNK2   | 1   | 213311161 | G   | 394 | 0.96 | 0.21 | 8.3E-01 | G                        | 292 | 1.10 | 0.25 | 6.9E-01 | G             | 281 | 0.82 | 0.28 | 4.9E-01 |
| rs1947582 | CSNK1A1 | 5   | 148872288 | T   | 394 | 1.16 | 0.15 | 3.1E-01 | T                        | 292 | 1.09 | 0.17 | 6.1E-01 | T             | 281 | 1.17 | 0.18 | 4.0E-01 |
| rs1951795 | HIF1A   | 14  | 61241179  | A   | 394 | 0.83 | 0.18 | 3.2E-01 | A                        | 292 | 0.88 | 0.22 | 5.4E-01 | A             | 281 | 0.73 | 0.24 | 1.9E-01 |
| rs1953209 | PRKD1   | 14  | 29395444  | G   | 394 | 1.03 | 0.14 | 8.3E-01 | G                        | 292 | 1.10 | 0.17 | 5.8E-01 | G             | 281 | 0.96 | 0.18 | 8.3E-01 |
| rs1953722 | PRKD1   | 14  | 29300389  | G   | 392 | 0.95 | 0.16 | 7.4E-01 | G                        | 290 | 1.16 | 0.19 | 4.4E-01 | G             | 280 | 0.76 | 0.21 | 2.0E-01 |
| rs1958987 | PRKD1   | 14  | 29409562  | C   | 390 | 0.86 | 0.15 | 3.3E-01 | C                        | 288 | 0.92 | 0.18 | 6.5E-01 | C             | 279 | 0.80 | 0.19 | 2.5E-01 |
| rs1959437 | PRKD1   | 14  | 29191765  | C   | 388 | 1.06 | 0.15 | 7.1E-01 | C                        | 286 | 1.13 | 0.19 | 5.2E-01 | C             | 280 | 0.98 | 0.19 | 9.3E-01 |
| rs1975285 | PENK    | 8   | 57521236  | G   | 386 | 0.82 | 0.17 | 2.5E-01 | G                        | 288 | 0.85 | 0.21 | 4.2E-01 | G             | 275 | 0.73 | 0.23 | 1.8E-01 |
| rs1977525 | GRIK1   | 21  | 29835464  | T   | 394 | 0.92 | 0.16 | 6.3E-01 | T                        | 292 | 0.80 | 0.21 | 2.9E-01 | T             | 281 | 1.13 | 0.20 | 5.4E-01 |
| rs1978431 | CACNA1A | 19  | 13482615  | T   | 394 | 1.05 | 0.15 | 7.6E-01 | T                        | 292 | 1.07 | 0.19 | 7.2E-01 | T             | 281 | 1.12 | 0.19 | 5.6E-01 |
| rs1979004 | KCNJ3   | 2   | 155421667 | A   | 385 | 1.10 | 0.16 | 5.7E-01 | A                        | 285 | 1.27 | 0.19 | 2.0E-01 | A             | 277 | 0.95 | 0.20 | 8.1E-01 |
| rs1980030 | GRK5    | 10  | 120960017 | G   | 394 | 1.20 | 0.15 | 2.3E-01 | G                        | 292 | 1.40 | 0.18 | 7.1E-02 | G             | 281 | 1.09 | 0.19 | 6.7E-01 |
| rs1982072 | TGFB1   | 19  | 46556349  | T   | 394 | 0.99 | 0.15 | 9.4E-01 | T                        | 292 | 0.90 | 0.19 | 5.7E-01 | T             | 281 | 1.08 | 0.19 | 7.0E-01 |
| rs198413  | CLCN6   | 1   | 11823389  | C   | 394 | 0.80 | 0.22 | 3.2E-01 | C                        | 292 | 0.92 | 0.26 | 7.4E-01 | C             | 281 | 0.57 | 0.31 | 6.4E-02 |
| rs1986420 | AIM     | 10  | 119746836 | G   | 394 | 0.69 | 0.29 | 2.0E-01 | G                        | 292 | 0.37 | 0.43 | 2.0E-02 | G             | 281 | 1.01 | 0.33 | 9.7E-01 |
| rs1987070 | PRKCE   | 2   | 46090950  | A   | 392 | 1.05 | 0.16 | 7.5E-01 | A                        | 290 | 1.08 | 0.19 | 6.9E-01 | A             | 279 | 1.00 | 0.20 | 1.0E+00 |
| rs1989172 | PRKD3   | 2   | 37379524  | A   | 394 | 1.05 | 0.19 | 7.8E-01 | A                        | 292 | 0.75 | 0.24 | 2.4E-01 | A             | 281 | 1.35 | 0.22 | 1.8E-01 |
| rs1992646 | GABRA6  | 5   | 161043839 | A   | 389 | 0.87 | 0.14 | 3.3E-01 | A                        | 287 | 0.86 | 0.17 | 3.8E-01 | A             | 277 | 0.89 | 0.19 | 5.4E-01 |
| rs1996147 | EGR3    | 8   | 22600103  | G   | 393 | 0.73 | 0.15 | 4.1E-02 | G                        | 291 | 0.83 | 0.18 | 3.0E-01 | G             | 281 | 0.62 | 0.20 | 1.7E-02 |
| rs1997644 | CSNK1E  | 22  | 37045168  | G   | 394 | 1.01 | 0.14 | 9.5E-01 | G                        | 292 | 0.92 | 0.16 | 6.2E-01 | G             | 281 | 1.14 | 0.17 | 4.3E-01 |
| rs1997794 | PDYN    | 20  | 1922858   | C   | 380 | 1.04 | 0.15 | 7.9E-01 | C                        | 284 | 0.90 | 0.19 | 5.9E-01 | C             | 269 | 1.18 | 0.18 | 3.6E-01 |
| rs1998977 | NTRK1   | 1   | 155070745 | T   | 394 | 1.15 | 0.15 | 3.6E-01 | T                        | 292 | 1.21 | 0.19 | 3.2E-01 | T             | 281 | 1.08 | 0.19 | 6.8E-01 |
| rs1999628 | GRK5    | 10  | 121207051 | A   | 394 | 0.98 | 0.21 | 9.2E-01 | A                        | 292 | 0.97 | 0.26 | 9.0E-01 | A             | 281 | 0.97 | 0.26 | 9.0E-01 |
| rs2000978 | CCKAR   | 4   | 26097087  | G   | 394 | 0.85 | 0.19 | 4.0E-01 | G                        | 292 | 0.83 | 0.23 | 4.3E-01 | G             | 281 | 0.80 | 0.24 | 3.5E-01 |
| rs2004426 | AIM     | 9   | 111651570 | T   | 394 | 1.17 | 0.18 | 3.8E-01 | T                        | 292 | 1.03 | 0.22 | 8.8E-01 | T             | 281 | 1.34 | 0.21 | 1.7E-01 |
| rs2008592 | AIM     | 10  | 30542827  | G   | 394 | 1.00 | 0.27 | 1.0E+00 | G                        | 292 | 1.01 | 0.32 | 9.7E-01 | G             | 281 | 0.87 | 0.34 | 6.8E-01 |
| rs2009705 | CAMK2B  | 7   | 44221559  | C   | 394 | 0.88 | 0.19 | 5.1E-01 | C                        | 292 | 1.00 | 0.22 | 9.9E-01 | C             | 281 | 0.78 | 0.24 | 3.0E-01 |
| rs2012859 | PICK1   | 22  | 36803652  | A   | 391 | 1.17 | 0.16 | 3.2E-01 | A                        | 289 | 1.00 | 0.20 | 9.8E-01 | A             | 280 | 1.50 | 0.20 | 4.2E-02 |
| rs2017022 | GALR3   | 22  | 36543329  | A   | 378 | 0.90 | 0.15 | 5.0E-01 | A                        | 281 | 0.96 | 0.18 | 8.4E-01 | A             | 268 | 0.82 | 0.19 | 3.1E-01 |
| rs2017247 | GABRB3  | 15  | 24340255  | T   | 394 | 0.99 | 0.16 | 9.3E-01 | T                        | 292 | 1.04 | 0.20 | 8.3E-01 | T             | 281 | 0.93 | 0.21 | 7.3E-01 |
| rs2017365 | DLG4    | 17  | 7063348   | G   | 394 | 0.96 | 0.14 | 7.8E-01 | G                        | 292 | 0.84 | 0.18 | 3.3E-01 | G             | 281 | 1.06 | 0.18 | 7.4E-01 |
| rs2018636 | GRIK1   | 21  | 29905636  | C   | 394 | 0.82 | 0.15 | 1.9E-01 | C                        | 292 | 0.75 | 0.18 | 1.0E-01 | C             | 281 | 0.89 | 0.18 | 5.3E-01 |
| rs2020917 | COMT    | 22  | 18308884  | T   | 384 | 1.05 | 0.15 | 7.6E-01 | T                        | 284 | 1.14 | 0.19 | 4.9E-01 | T             | 274 | 1.01 | 0.19 | 9.7E-01 |
| rs2020933 | SLC6A4  | 17  | 25585881  | T   | 394 | 1.51 | 0.32 | 2.1E-01 | T                        | 292 | 1.46 | 0.39 | 3.4E-01 | T             | 281 | 1.79 | 0.39 | 1.3E-01 |

| SNP       | GENE     | CHR | BP        | TMD |     |      |      |         | TMD with widespread pain |     |      |      |         | Localized TMD |     |      |      |         |
|-----------|----------|-----|-----------|-----|-----|------|------|---------|--------------------------|-----|------|------|---------|---------------|-----|------|------|---------|
|           |          |     |           | A1  | N   | OR   | SE   | P       | A1                       | N   | OR   | SE   | P       | A1            | N   | OR   | SE   | P       |
| rs2020942 | SLC6A4   | 17  | 25571040  | T   | 394 | 1.06 | 0.16 | 7.0E-01 | T                        | 292 | 1.03 | 0.19 | 8.7E-01 | T             | 281 | 1.02 | 0.20 | 9.2E-01 |
| rs2027765 | P2RY6    | 11  | 72661678  | G   | 393 | 1.17 | 0.15 | 2.9E-01 | G                        | 291 | 1.07 | 0.18 | 7.3E-01 | G             | 281 | 1.19 | 0.19 | 3.5E-01 |
| rs2029091 | PPP3R1   | 2   | 68331452  | C   | 391 | 0.96 | 0.14 | 8.0E-01 | C                        | 289 | 1.00 | 0.17 | 9.9E-01 | C             | 279 | 0.96 | 0.17 | 8.2E-01 |
| rs2036107 | ADRA1A   | 8   | 26757361  | G   | 394 | 0.95 | 0.16 | 7.5E-01 | G                        | 292 | 0.92 | 0.20 | 6.8E-01 | G             | 281 | 0.89 | 0.20 | 5.7E-01 |
| rs2036565 | AIM      | 5   | 118560770 | A   | 394 | 1.02 | 0.14 | 8.9E-01 | A                        | 292 | 1.08 | 0.17 | 6.8E-01 | A             | 281 | 0.94 | 0.18 | 7.2E-01 |
| rs204069  | OPRD1    | 1   | 29067405  | A   | 394 | 1.05 | 0.14 | 7.2E-01 | A                        | 292 | 1.01 | 0.17 | 9.8E-01 | A             | 281 | 1.08 | 0.18 | 6.9E-01 |
| rs2041837 | PRKD3    | 2   | 37322068  | G   | 394 | 0.88 | 0.15 | 3.8E-01 | G                        | 292 | 0.98 | 0.18 | 9.3E-01 | G             | 281 | 0.83 | 0.19 | 3.1E-01 |
| rs2041986 | GRIN2B   | 12  | 13929237  | A   | 394 | 0.96 | 0.17 | 8.0E-01 | A                        | 292 | 1.16 | 0.20 | 4.6E-01 | A             | 281 | 0.77 | 0.22 | 2.3E-01 |
| rs2044041 | PPP3CA   | 4   | 102454392 | A   | 393 | 1.03 | 0.15 | 8.4E-01 | A                        | 291 | 1.01 | 0.18 | 9.3E-01 | A             | 281 | 1.11 | 0.18 | 5.6E-01 |
| rs2049046 | BDNF     | 11  | 27680351  | A   | 379 | 0.80 | 0.15 | 1.3E-01 | A                        | 283 | 0.87 | 0.17 | 4.0E-01 | A             | 270 | 0.71 | 0.18 | 6.0E-02 |
| rs2051182 | GRIK1    | 21  | 29905291  | T   | 394 | 0.80 | 0.17 | 2.0E-01 | T                        | 292 | 0.78 | 0.21 | 2.5E-01 | T             | 281 | 0.77 | 0.22 | 2.3E-01 |
| rs2051394 | RUNX1    | 21  | 35128012  | G   | 394 | 0.90 | 0.14 | 4.4E-01 | G                        | 292 | 0.92 | 0.17 | 6.4E-01 | G             | 281 | 0.82 | 0.17 | 2.5E-01 |
| rs2052030 | TRPM8    | 2   | 234592349 | C   | 394 | 1.01 | 0.16 | 9.4E-01 | C                        | 292 | 1.11 | 0.19 | 5.8E-01 | C             | 281 | 0.93 | 0.20 | 7.0E-01 |
| rs20541   | IL13     | 5   | 132023863 | A   | 394 | 0.87 | 0.17 | 4.0E-01 | A                        | 292 | 0.90 | 0.21 | 6.3E-01 | A             | 281 | 0.89 | 0.21 | 5.7E-01 |
| rs2057894 | CACNA2D1 | 7   | 81646551  | C   | 394 | 0.95 | 0.15 | 7.1E-01 | C                        | 292 | 1.04 | 0.18 | 8.3E-01 | C             | 281 | 0.84 | 0.19 | 3.6E-01 |
| rs2060014 | ATP1B3   | 3   | 143085724 | T   | 394 | 1.09 | 0.29 | 7.7E-01 | T                        | 292 | 1.13 | 0.34 | 7.2E-01 | T             | 281 | 1.01 | 0.37 | 9.7E-01 |
| rs2060199 | SCN2A    | 2   | 165904927 | T   | 393 | 0.97 | 0.14 | 8.2E-01 | T                        | 291 | 0.92 | 0.18 | 6.4E-01 | T             | 281 | 1.03 | 0.18 | 8.7E-01 |
| rs2066470 | MTHFR    | 1   | 11785644  | A   | 394 | 1.00 | 0.22 | 1.0E+00 | A                        | 292 | 1.06 | 0.27 | 8.3E-01 | A             | 281 | 1.04 | 0.29 | 8.9E-01 |
| rs2066712 | GABRG3   | 15  | 25446362  | G   | 392 | 1.01 | 0.51 | 9.9E-01 | G                        | 290 | 0.82 | 0.64 | 7.5E-01 | G             | 281 | 1.13 | 0.59 | 8.3E-01 |
| rs2066713 | SLC6A4   | 17  | 25575791  | A   | 392 | 1.06 | 0.16 | 6.9E-01 | A                        | 290 | 1.04 | 0.19 | 8.4E-01 | A             | 280 | 1.01 | 0.20 | 9.6E-01 |
| rs2066960 | IL13     | 5   | 132022334 | A   | 394 | 0.74 | 0.26 | 2.5E-01 | A                        | 292 | 0.64 | 0.33 | 1.9E-01 | A             | 281 | 0.77 | 0.33 | 4.3E-01 |
| rs2067477 | CHRM1    | 11  | 62434882  | T   | 376 | 0.91 | 0.26 | 7.1E-01 | T                        | 278 | 0.78 | 0.33 | 4.6E-01 | T             | 271 | 0.99 | 0.32 | 9.8E-01 |
| rs2067482 | CHRM4    | 11  | 46363343  | A   | 387 | 1.45 | 0.20 | 5.9E-02 | A                        | 288 | 1.40 | 0.24 | 1.6E-01 | A             | 274 | 1.47 | 0.24 | 1.0E-01 |
| rs206811  | XDH      | 2   | 31490419  | A   | 394 | 1.08 | 0.15 | 6.1E-01 | A                        | 292 | 1.22 | 0.18 | 2.6E-01 | A             | 281 | 0.98 | 0.18 | 9.2E-01 |
| rs206812  | XDH      | 2   | 31491373  | C   | 393 | 0.98 | 0.15 | 8.8E-01 | C                        | 291 | 1.11 | 0.18 | 5.8E-01 | C             | 280 | 0.86 | 0.19 | 4.2E-01 |
| rs206847  | XDH      | 2   | 31464871  | T   | 394 | 1.08 | 0.15 | 6.1E-01 | T                        | 292 | 1.22 | 0.18 | 2.6E-01 | T             | 281 | 0.97 | 0.19 | 8.6E-01 |
| rs206851  | XDH      | 2   | 31467586  | A   | 394 | 1.00 | 0.16 | 1.0E+00 | A                        | 292 | 1.07 | 0.18 | 7.1E-01 | A             | 281 | 0.98 | 0.20 | 9.0E-01 |
| rs206860  | XDH      | 2   | 31476308  | G   | 394 | 1.14 | 0.15 | 4.0E-01 | G                        | 292 | 1.33 | 0.18 | 1.1E-01 | G             | 281 | 1.00 | 0.20 | 1.0E+00 |
| rs2069575 | BDKRB2   | 14  | 95772340  | A   | 393 | 0.88 | 0.16 | 4.2E-01 | A                        | 291 | 0.90 | 0.19 | 5.6E-01 | A             | 281 | 0.82 | 0.20 | 3.3E-01 |
| rs2069582 | BDKRB2   | 14  | 95774905  | G   | 394 | 0.90 | 0.16 | 5.2E-01 | G                        | 292 | 0.84 | 0.20 | 3.7E-01 | G             | 281 | 0.93 | 0.20 | 7.4E-01 |
| rs2069613 | BDKRB1   | 14  | 95786485  | C   | 394 | 0.86 | 0.16 | 3.7E-01 | C                        | 292 | 0.83 | 0.20 | 3.6E-01 | C             | 281 | 0.86 | 0.21 | 4.9E-01 |
| rs2069705 | IFNG     | 12  | 66841278  | G   | 389 | 1.30 | 0.16 | 1.0E-01 | G                        | 290 | 1.19 | 0.19 | 3.6E-01 | G             | 278 | 1.38 | 0.20 | 9.9E-02 |
| rs2069707 | IFNG     | 12  | 66840555  | C   | 394 | 0.71 | 0.30 | 2.4E-01 | C                        | 292 | 0.66 | 0.40 | 3.1E-01 | C             | 281 | 0.85 | 0.37 | 6.6E-01 |
| rs2069757 | IL13     | 5   | 132026312 | A   | 387 | 1.06 | 0.26 | 8.1E-01 | A                        | 287 | 1.34 | 0.30 | 3.3E-01 | A             | 275 | 0.97 | 0.35 | 9.3E-01 |
| rs2069762 | IL2      | 4   | 123597430 | C   | 394 | 1.09 | 0.16 | 5.8E-01 | C                        | 292 | 1.04 | 0.20 | 8.5E-01 | C             | 281 | 1.19 | 0.20 | 3.8E-01 |
| rs2069763 | IL2      | 4   | 123596932 | A   | 394 | 1.03 | 0.16 | 8.7E-01 | A                        | 292 | 1.11 | 0.20 | 5.9E-01 | A             | 281 | 1.06 | 0.20 | 7.7E-01 |
| rs2069772 | IL2      | 4   | 123592583 | C   | 394 | 1.00 | 0.16 | 1.0E+00 | C                        | 292 | 1.00 | 0.21 | 9.9E-01 | C             | 281 | 1.03 | 0.21 | 8.8E-01 |
| rs2069845 | IL6      | 7   | 22736674  | G   | 394 | 0.98 | 0.14 | 8.9E-01 | G                        | 292 | 1.01 | 0.17 | 9.5E-01 | G             | 281 | 0.94 | 0.17 | 7.2E-01 |
| rs2069849 | IL6      | 7   | 22737681  | T   | 394 | 1.00 | 0.46 | 1.0E+00 | T                        | 292 | 0.90 | 0.56 | 8.5E-01 | T             | 281 | 1.01 | 0.56 | 9.8E-01 |



| SNP       | GENE     | CHR | BP        | TMD |     |      |      |         | TMD with widespread pain |     |      |      |         | Localized TMD |     |      |      |         |
|-----------|----------|-----|-----------|-----|-----|------|------|---------|--------------------------|-----|------|------|---------|---------------|-----|------|------|---------|
|           |          |     |           | A1  | N   | OR   | SE   | P       | A1                       | N   | OR   | SE   | P       | A1            | N   | OR   | SE   | P       |
| rs2070655 | APP      | 21  | 26345432  | T   | 394 | 1.41 | 0.15 | 2.3E-02 | T                        | 292 | 1.25 | 0.18 | 2.2E-01 | T             | 281 | 1.57 | 0.18 | 1.4E-02 |
| rs2070677 | CYP2E1   | 10  | 135201164 | T   | 394 | 1.06 | 0.24 | 8.1E-01 | T                        | 292 | 1.26 | 0.28 | 4.1E-01 | T             | 281 | 0.81 | 0.32 | 5.0E-01 |
| rs2070874 | IL4      | 5   | 132037609 | T   | 394 | 0.64 | 0.21 | 3.4E-02 | T                        | 292 | 0.59 | 0.26 | 4.6E-02 | T             | 281 | 0.72 | 0.26 | 2.0E-01 |
| rs2070995 | KCNJ6    | 21  | 38008835  | T   | 394 | 1.27 | 0.18 | 1.8E-01 | T                        | 292 | 1.45 | 0.21 | 8.1E-02 | T             | 281 | 1.05 | 0.24 | 8.3E-01 |
| rs2071029 | RUNX1    | 21  | 35344348  | T   | 394 | 0.91 | 0.20 | 6.2E-01 | T                        | 292 | 0.94 | 0.24 | 8.0E-01 | T             | 281 | 0.91 | 0.26 | 7.1E-01 |
| rs2071084 | BDKRB1   | 14  | 95799895  | A   | 394 | 1.32 | 0.19 | 1.5E-01 | A                        | 292 | 1.38 | 0.23 | 1.7E-01 | A             | 281 | 1.39 | 0.25 | 1.9E-01 |
| rs2071373 | IL1A     | 2   | 113256555 | G   | 394 | 1.04 | 0.16 | 8.1E-01 | G                        | 292 | 1.01 | 0.20 | 9.4E-01 | G             | 281 | 1.25 | 0.21 | 2.9E-01 |
| rs2071409 | MPO      | 17  | 53703229  | G   | 393 | 0.95 | 0.20 | 7.8E-01 | G                        | 292 | 0.98 | 0.25 | 9.3E-01 | G             | 280 | 0.92 | 0.26 | 7.5E-01 |
| rs2071493 | ADRB3    | 8   | 37941010  | C   | 394 | 0.69 | 0.26 | 1.6E-01 | C                        | 292 | 0.79 | 0.32 | 4.6E-01 | C             | 281 | 0.66 | 0.35 | 2.3E-01 |
| rs2071803 | CACNA2D2 | 3   | 50382348  | A   | 394 | 1.32 | 0.23 | 2.2E-01 | A                        | 292 | 1.17 | 0.27 | 5.7E-01 | A             | 281 | 1.57 | 0.28 | 1.1E-01 |
| rs2071863 | MAPK13   | 6   | 36215150  | A   | 391 | 0.77 | 0.20 | 1.8E-01 | A                        | 290 | 0.65 | 0.25 | 9.1E-02 | A             | 279 | 0.96 | 0.25 | 8.8E-01 |
| rs2072100 | TAC1     | 7   | 97199720  | T   | 393 | 1.07 | 0.15 | 6.6E-01 | T                        | 291 | 0.99 | 0.18 | 9.8E-01 | T             | 281 | 1.13 | 0.18 | 5.0E-01 |
| rs2072454 | EGFR     | 7   | 55181842  | C   | 394 | 0.80 | 0.14 | 1.1E-01 | C                        | 292 | 0.72 | 0.17 | 5.1E-02 | C             | 281 | 0.92 | 0.18 | 6.4E-01 |
| rs2072659 | CHRN2    | 1   | 152815145 | G   | 394 | 1.26 | 0.24 | 3.4E-01 | G                        | 292 | 1.46 | 0.28 | 1.7E-01 | G             | 281 | 0.98 | 0.31 | 9.5E-01 |
| rs2072878 | MAPK11   | 22  | 49045186  | G   | 378 | 0.77 | 0.49 | 6.0E-01 | G                        | 278 | 0.70 | 0.61 | 5.6E-01 | G             | 269 | 0.77 | 0.61 | 6.7E-01 |
| rs2074879 | CACNA1A  | 19  | 13233589  | T   | 394 | 0.98 | 0.15 | 8.8E-01 | T                        | 292 | 0.99 | 0.18 | 9.4E-01 | T             | 281 | 0.97 | 0.18 | 8.8E-01 |
| rs2075102 | EGFR     | 7   | 55220799  | C   | 380 | 1.05 | 0.15 | 7.4E-01 | C                        | 280 | 0.99 | 0.18 | 9.3E-01 | C             | 269 | 1.09 | 0.19 | 6.6E-01 |
| rs2075112 | EGFR     | 7   | 55187105  | A   | 388 | 0.82 | 0.14 | 1.5E-01 | A                        | 288 | 0.77 | 0.17 | 1.2E-01 | A             | 276 | 0.88 | 0.17 | 4.8E-01 |
| rs2075302 | DPP4     | 2   | 162784392 | C   | 393 | 0.94 | 0.15 | 6.7E-01 | C                        | 291 | 0.86 | 0.18 | 3.8E-01 | C             | 280 | 1.07 | 0.18 | 7.2E-01 |
| rs2075572 | OPRM1    | 6   | 154453697 | G   | 393 | 1.04 | 0.15 | 7.8E-01 | G                        | 291 | 1.04 | 0.18 | 8.5E-01 | G             | 281 | 1.00 | 0.19 | 9.8E-01 |
| rs2075912 | RET      | 10  | 42942223  | T   | 394 | 0.72 | 0.19 | 8.2E-02 | T                        | 292 | 0.70 | 0.23 | 1.2E-01 | T             | 281 | 0.79 | 0.24 | 3.1E-01 |
| rs2076369 | PICK1    | 22  | 36793598  | T   | 391 | 0.96 | 0.15 | 7.8E-01 | T                        | 290 | 1.09 | 0.17 | 6.3E-01 | T             | 280 | 0.83 | 0.19 | 3.2E-01 |
| rs2077171 | NOS1     | 12  | 116240885 | T   | 394 | 1.11 | 0.15 | 5.0E-01 | T                        | 292 | 1.35 | 0.18 | 9.1E-02 | T             | 281 | 0.94 | 0.19 | 7.6E-01 |
| rs2077647 | ESR1     | 6   | 152170770 | C   | 390 | 1.05 | 0.14 | 7.3E-01 | C                        | 290 | 1.00 | 0.17 | 9.9E-01 | C             | 278 | 1.18 | 0.18 | 3.7E-01 |
| rs208288  | P2RX7    | 12  | 120072471 | C   | 394 | 1.20 | 0.27 | 5.1E-01 | C                        | 292 | 1.43 | 0.32 | 2.7E-01 | C             | 281 | 1.05 | 0.35 | 8.8E-01 |
| rs2083422 | GABRA2   | 4   | 45991701  | T   | 392 | 0.98 | 0.14 | 8.7E-01 | T                        | 290 | 1.02 | 0.18 | 9.1E-01 | T             | 281 | 0.96 | 0.18 | 8.0E-01 |
| rs2084202 | DBI      | 2   | 119841499 | A   | 378 | 1.16 | 0.20 | 4.6E-01 | A                        | 279 | 1.14 | 0.24 | 5.8E-01 | A             | 271 | 1.08 | 0.25 | 7.6E-01 |
| rs2090414 | PRKCE    | 2   | 45805925  | A   | 392 | 1.05 | 0.15 | 7.7E-01 | A                        | 291 | 1.07 | 0.17 | 7.2E-01 | A             | 279 | 1.03 | 0.18 | 8.9E-01 |
| rs209345  | GABRG2   | 5   | 161423965 | C   | 394 | 1.60 | 0.33 | 1.6E-01 | C                        | 292 | 1.29 | 0.41 | 5.4E-01 | C             | 281 | 1.83 | 0.38 | 1.1E-01 |
| rs209350  | GABRG2   | 5   | 161443374 | T   | 394 | 1.04 | 0.19 | 8.5E-01 | T                        | 292 | 1.06 | 0.22 | 7.9E-01 | T             | 281 | 0.89 | 0.24 | 6.3E-01 |
| rs2097761 | ACCN1    | 17  | 29511447  | G   | 393 | 1.34 | 0.17 | 8.4E-02 | G                        | 291 | 1.28 | 0.20 | 2.3E-01 | G             | 280 | 1.43 | 0.21 | 9.5E-02 |
| rs2100432 | ANXA2    | 15  | 58475136  | A   | 393 | 1.10 | 0.16 | 5.5E-01 | A                        | 291 | 1.10 | 0.19 | 6.2E-01 | A             | 280 | 1.12 | 0.20 | 5.7E-01 |
| rs2102727 | AIM      | 8   | 53063166  | A   | 384 | 1.03 | 0.18 | 8.7E-01 | A                        | 283 | 1.12 | 0.21 | 5.9E-01 | A             | 276 | 0.91 | 0.24 | 7.0E-01 |
| rs2103043 | ZFAND6   | 15  | 78213138  | G   | 393 | 0.88 | 0.15 | 4.0E-01 | G                        | 291 | 1.01 | 0.18 | 9.7E-01 | G             | 281 | 0.69 | 0.19 | 5.7E-02 |
| rs2105380 | GRK4     | 4   | 2952727   | T   | 393 | 0.79 | 0.40 | 5.6E-01 | T                        | 291 | 0.91 | 0.46 | 8.5E-01 | T             | 281 | 0.59 | 0.56 | 3.4E-01 |
| rs2107538 | CCL5     | 17  | 31231893  | T   | 394 | 0.83 | 0.18 | 2.9E-01 | T                        | 292 | 0.76 | 0.23 | 2.3E-01 | T             | 281 | 0.91 | 0.22 | 6.6E-01 |
| rs211014  | GABRG2   | 5   | 161508996 | A   | 394 | 1.37 | 0.16 | 5.1E-02 | A                        | 292 | 1.31 | 0.19 | 1.6E-01 | A             | 281 | 1.37 | 0.19 | 1.0E-01 |
| rs211029  | GABRG2   | 5   | 161465644 | C   | 394 | 1.35 | 0.14 | 3.9E-02 | C                        | 292 | 1.28 | 0.17 | 1.6E-01 | C             | 281 | 1.46 | 0.19 | 4.0E-02 |
| rs211037  | GABRG2   | 5   | 161460858 | T   | 393 | 1.24 | 0.16 | 1.8E-01 | T                        | 291 | 1.27 | 0.19 | 2.2E-01 | T             | 281 | 1.18 | 0.20 | 4.1E-01 |

| SNP       | GENE   | CHR | BP        | TMD |     |      |      |         | TMD with widespread pain |     |      |      |         | Localized TMD |     |      |      |         |
|-----------|--------|-----|-----------|-----|-----|------|------|---------|--------------------------|-----|------|------|---------|---------------|-----|------|------|---------|
|           |        |     |           | A1  | N   | OR   | SE   | P       | A1                       | N   | OR   | SE   | P       | A1            | N   | OR   | SE   | P       |
| rs2111375 | TACR1  | 2   | 75281386  | A   | 382 | 1.02 | 0.15 | 9.1E-01 | A                        | 280 | 1.21 | 0.18 | 2.9E-01 | A             | 273 | 0.88 | 0.20 | 5.3E-01 |
| rs2111850 | DPP4   | 2   | 162599525 | C   | 390 | 0.97 | 0.15 | 8.4E-01 | C                        | 289 | 1.00 | 0.18 | 9.9E-01 | C             | 279 | 0.94 | 0.19 | 7.5E-01 |
| rs2113418 | KCNIP3 | 2   | 95352576  | G   | 390 | 0.88 | 0.15 | 3.7E-01 | G                        | 290 | 0.78 | 0.18 | 1.9E-01 | G             | 280 | 1.03 | 0.18 | 8.6E-01 |
| rs2119767 | GABRA2 | 4   | 46086330  | A   | 391 | 0.90 | 0.15 | 5.1E-01 | A                        | 289 | 1.07 | 0.17 | 7.0E-01 | A             | 278 | 0.73 | 0.20 | 1.2E-01 |
| rs2120266 | NTRK2  | 9   | 86646171  | A   | 394 | 0.98 | 0.19 | 9.2E-01 | A                        | 292 | 0.96 | 0.24 | 8.7E-01 | A             | 281 | 1.10 | 0.25 | 7.0E-01 |
| rs2122822 | DDC    | 7   | 50519646  | G   | 394 | 1.05 | 0.15 | 7.6E-01 | G                        | 292 | 1.14 | 0.18 | 4.8E-01 | G             | 281 | 0.95 | 0.19 | 7.8E-01 |
| rs2130531 | ARL5B  | 10  | 18987385  | A   | 394 | 1.41 | 0.20 | 8.1E-02 | A                        | 292 | 1.26 | 0.24 | 3.3E-01 | A             | 281 | 1.58 | 0.23 | 5.0E-02 |
| rs2134647 | PRKACB | 1   | 84451006  | C   | 394 | 0.83 | 0.15 | 2.1E-01 | C                        | 292 | 0.91 | 0.18 | 5.8E-01 | C             | 281 | 0.77 | 0.18 | 1.6E-01 |
| rs2134655 | DRD3   | 3   | 115340891 | T   | 393 | 0.99 | 0.16 | 9.7E-01 | T                        | 291 | 0.69 | 0.22 | 8.9E-02 | T             | 281 | 1.32 | 0.20 | 1.6E-01 |
| rs2138789 | GRK7   | 3   | 142991441 | A   | 394 | 1.07 | 0.18 | 7.2E-01 | A                        | 292 | 1.01 | 0.22 | 9.7E-01 | A             | 281 | 1.11 | 0.22 | 6.2E-01 |
| rs214482  | APP    | 21  | 26225544  | G   | 394 | 0.92 | 0.18 | 6.5E-01 | G                        | 292 | 0.79 | 0.23 | 3.1E-01 | G             | 281 | 1.12 | 0.22 | 6.1E-01 |
| rs2145362 | MAPK14 | 6   | 36137133  | C   | 394 | 0.60 | 0.25 | 4.2E-02 | C                        | 292 | 0.46 | 0.34 | 2.3E-02 | C             | 281 | 0.74 | 0.30 | 3.1E-01 |
| rs2148582 | AGT    | 1   | 228916422 | G   | 387 | 0.85 | 0.15 | 2.9E-01 | G                        | 287 | 0.87 | 0.18 | 4.4E-01 | G             | 276 | 0.87 | 0.19 | 4.5E-01 |
| rs2150906 | NTRK1  | 1   | 155051980 | T   | 393 | 1.34 | 0.31 | 3.5E-01 | T                        | 291 | 1.76 | 0.36 | 1.2E-01 | T             | 281 | 1.07 | 0.41 | 8.7E-01 |
| rs2151745 | PRKD1  | 14  | 29468278  | C   | 394 | 1.00 | 0.30 | 1.0E+00 | C                        | 292 | 1.20 | 0.35 | 6.1E-01 | C             | 281 | 0.78 | 0.40 | 5.4E-01 |
| rs2154487 | GRIK1  | 21  | 29926665  | G   | 391 | 0.84 | 0.14 | 2.1E-01 | G                        | 290 | 0.71 | 0.18 | 5.1E-02 | G             | 278 | 0.95 | 0.17 | 7.6E-01 |
| rs2160652 | TACR1  | 2   | 75188279  | T   | 394 | 0.88 | 0.15 | 4.0E-01 | T                        | 292 | 0.80 | 0.18 | 2.1E-01 | T             | 281 | 0.97 | 0.19 | 8.7E-01 |
| rs216535  | CAMK4  | 5   | 110648760 | A   | 394 | 0.93 | 0.15 | 6.5E-01 | A                        | 292 | 0.99 | 0.18 | 9.7E-01 | A             | 281 | 0.86 | 0.19 | 4.3E-01 |
| rs2168631 | DRD1   | 5   | 174808608 | A   | 394 | 1.10 | 0.18 | 5.9E-01 | A                        | 292 | 1.26 | 0.21 | 2.7E-01 | A             | 281 | 0.91 | 0.23 | 6.9E-01 |
| rs2172249 | P2RY12 | 3   | 152543454 | G   | 394 | 1.16 | 0.16 | 3.5E-01 | G                        | 292 | 1.03 | 0.20 | 8.7E-01 | G             | 281 | 1.38 | 0.20 | 9.8E-02 |
| rs2185136 | INADL  | 1   | 62067018  | G   | 394 | 1.17 | 0.28 | 5.8E-01 | G                        | 292 | 1.10 | 0.35 | 7.9E-01 | G             | 281 | 1.57 | 0.34 | 1.9E-01 |
| rs2185886 | GRK4   | 4   | 2941295   | C   | 394 | 1.00 | 0.15 | 1.0E+00 | C                        | 292 | 0.95 | 0.18 | 7.6E-01 | C             | 281 | 1.02 | 0.18 | 9.2E-01 |
| rs2188886 | GLRA2  | 23  | 14629632  | G   | 394 | 0.95 | 0.15 | 7.1E-01 | G                        | 292 | 0.83 | 0.18 | 3.2E-01 | G             | 281 | 1.08 | 0.19 | 6.7E-01 |
| rs2188931 | GLRA2  | 23  | 14524494  | T   | 394 | 0.79 | 0.49 | 6.3E-01 | T                        | 292 | 1.00 | 0.57 | 9.9E-01 | T             | 281 | 0.66 | 0.68 | 5.5E-01 |
| rs2190242 | CRHR2  | 7   | 30676000  | C   | 394 | 0.88 | 0.17 | 4.4E-01 | C                        | 292 | 0.85 | 0.22 | 4.5E-01 | C             | 281 | 0.98 | 0.21 | 9.4E-01 |
| rs2193511 | GRIN2B | 12  | 13896054  | A   | 394 | 0.92 | 0.15 | 5.5E-01 | A                        | 292 | 0.79 | 0.19 | 2.0E-01 | A             | 281 | 1.11 | 0.19 | 5.6E-01 |
| rs2193595 | AIM    | 14  | 76914874  | G   | 394 | 1.02 | 0.14 | 8.9E-01 | G                        | 292 | 1.15 | 0.17 | 4.1E-01 | G             | 281 | 0.89 | 0.17 | 5.2E-01 |
| rs2194159 | GABRB2 | 5   | 160704868 | G   | 393 | 1.02 | 0.18 | 9.0E-01 | G                        | 291 | 0.92 | 0.22 | 7.0E-01 | G             | 281 | 1.09 | 0.22 | 7.2E-01 |
| rs2194958 | GABRB3 | 15  | 24458502  | C   | 394 | 0.85 | 0.15 | 2.6E-01 | C                        | 292 | 0.76 | 0.19 | 1.5E-01 | C             | 281 | 0.87 | 0.19 | 4.8E-01 |
| rs219872  | GRIN2B | 12  | 13966697  | G   | 394 | 0.84 | 0.20 | 3.7E-01 | G                        | 292 | 0.82 | 0.25 | 4.3E-01 | G             | 281 | 0.86 | 0.25 | 5.4E-01 |
| rs219934  | GRIN2B | 12  | 14004982  | A   | 394 | 0.91 | 0.14 | 5.2E-01 | A                        | 292 | 1.03 | 0.17 | 8.6E-01 | A             | 281 | 0.84 | 0.18 | 3.5E-01 |
| rs2205364 | GABRG2 | 5   | 161492710 | G   | 392 | 1.18 | 0.21 | 4.3E-01 | G                        | 290 | 1.05 | 0.26 | 8.5E-01 | G             | 279 | 1.33 | 0.26 | 2.8E-01 |
| rs220558  | GRIN2B | 12  | 13839332  | A   | 394 | 1.02 | 0.15 | 8.8E-01 | A                        | 292 | 0.96 | 0.18 | 8.2E-01 | A             | 281 | 1.07 | 0.19 | 7.3E-01 |
| rs220575  | GRIN2B | 12  | 13848553  | G   | 392 | 1.02 | 0.15 | 8.8E-01 | G                        | 290 | 0.96 | 0.18 | 8.0E-01 | G             | 280 | 1.07 | 0.19 | 7.2E-01 |
| rs220587  | GRIN2B | 12  | 13853537  | C   | 394 | 1.13 | 0.15 | 4.2E-01 | C                        | 292 | 0.96 | 0.18 | 8.3E-01 | C             | 281 | 1.31 | 0.19 | 1.5E-01 |
| rs2206593 | PTGS2  | 1   | 184909052 | A   | 394 | 1.24 | 0.27 | 4.2E-01 | A                        | 292 | 1.24 | 0.32 | 5.0E-01 | A             | 281 | 1.22 | 0.33 | 5.5E-01 |
| rs2207231 | ESR1   | 6   | 152371577 | G   | 393 | 1.09 | 0.22 | 6.9E-01 | G                        | 291 | 0.83 | 0.28 | 5.1E-01 | G             | 280 | 1.25 | 0.25 | 3.8E-01 |
| rs2207396 | ESR1   | 6   | 152424075 | A   | 393 | 0.83 | 0.17 | 2.6E-01 | A                        | 291 | 0.90 | 0.20 | 6.1E-01 | A             | 281 | 0.70 | 0.23 | 1.2E-01 |
| rs2211842 | KCNJ6  | 21  | 38105403  | A   | 394 | 0.98 | 0.15 | 8.8E-01 | A                        | 292 | 0.94 | 0.18 | 7.2E-01 | A             | 281 | 1.08 | 0.19 | 6.7E-01 |

| SNP       | GENE    | CHR | BP        | TMD |     |      |      |         | TMD with widespread pain |     |      |      |         | Localized TMD |     |      |      |         |
|-----------|---------|-----|-----------|-----|-----|------|------|---------|--------------------------|-----|------|------|---------|---------------|-----|------|------|---------|
|           |         |     |           | A1  | N   | OR   | SE   | P       | A1                       | N   | OR   | SE   | P       | A1            | N   | OR   | SE   | P       |
| rs2216307 | TACR1   | 2   | 75246339  | T   | 394 | 0.92 | 0.14 | 5.7E-01 | T                        | 292 | 0.84 | 0.18 | 3.2E-01 | T             | 281 | 1.03 | 0.18 | 8.9E-01 |
| rs2220128 | AIM     | 1   | 184002536 | A   | 394 | 0.99 | 0.16 | 9.4E-01 | A                        | 292 | 1.00 | 0.20 | 9.8E-01 | A             | 281 | 0.98 | 0.20 | 9.1E-01 |
| rs2220858 | AIM     | 5   | 116660106 | C   | 391 | 1.10 | 0.15 | 5.5E-01 | C                        | 290 | 1.35 | 0.19 | 1.1E-01 | C             | 279 | 0.91 | 0.19 | 6.1E-01 |
| rs2223307 | PLA2G4A | 1   | 185111549 | C   | 394 | 1.04 | 0.15 | 8.2E-01 | C                        | 292 | 0.92 | 0.19 | 6.4E-01 | C             | 281 | 1.14 | 0.19 | 5.1E-01 |
| rs2223310 | PLA2G4A | 1   | 185143834 | C   | 394 | 1.60 | 0.35 | 1.8E-01 | C                        | 292 | 1.05 | 0.47 | 9.1E-01 | C             | 281 | 2.62 | 0.40 | 1.6E-02 |
| rs2225979 | AIM     | 9   | 9720381   | A   | 384 | 1.06 | 0.14 | 6.8E-01 | A                        | 283 | 0.98 | 0.17 | 9.0E-01 | A             | 274 | 1.02 | 0.17 | 9.1E-01 |
| rs2227284 | IL4     | 5   | 132040624 | T   | 394 | 0.94 | 0.16 | 6.9E-01 | T                        | 292 | 0.94 | 0.19 | 7.6E-01 | T             | 281 | 0.94 | 0.20 | 7.4E-01 |
| rs2227306 | IL8     | 4   | 74825919  | T   | 394 | 0.86 | 0.14 | 2.6E-01 | T                        | 292 | 0.77 | 0.17 | 1.3E-01 | T             | 281 | 0.97 | 0.18 | 8.5E-01 |
| rs2227307 | IL8     | 4   | 74825533  | G   | 389 | 0.81 | 0.14 | 1.3E-01 | G                        | 288 | 0.73 | 0.17 | 6.2E-02 | G             | 277 | 0.90 | 0.18 | 5.5E-01 |
| rs2228014 | CXCR4   | 2   | 136589554 | A   | 394 | 1.20 | 0.35 | 6.0E-01 | A                        | 292 | 0.97 | 0.46 | 9.5E-01 | A             | 281 | 1.50 | 0.40 | 3.2E-01 |
| rs2228058 | PTGER4  | 5   | 40717011  | T   | 394 | 0.91 | 0.31 | 7.6E-01 | T                        | 292 | 1.43 | 0.34 | 2.9E-01 | T             | 281 | 0.39 | 0.51 | 6.3E-02 |
| rs2228480 | ESR1    | 6   | 152461788 | A   | 394 | 1.21 | 0.19 | 3.1E-01 | A                        | 292 | 1.02 | 0.23 | 9.3E-01 | A             | 281 | 1.39 | 0.23 | 1.6E-01 |
| rs2228989 | ACCN1   | 17  | 29507383  | G   | 394 | 0.83 | 0.18 | 2.9E-01 | G                        | 292 | 0.89 | 0.21 | 5.8E-01 | G             | 281 | 0.78 | 0.23 | 2.7E-01 |
| rs2228990 | ACCN1   | 17  | 29507350  | G   | 394 | 0.82 | 0.18 | 2.5E-01 | G                        | 292 | 0.88 | 0.21 | 5.3E-01 | G             | 281 | 0.77 | 0.23 | 2.4E-01 |
| rs2229109 | ABCB1   | 7   | 87017745  | T   | 394 | 1.29 | 0.42 | 5.4E-01 | T                        | 292 | 0.64 | 0.60 | 4.6E-01 | T             | 281 | 1.94 | 0.46 | 1.5E-01 |
| rs2229155 | ADORA3  | 1   | 111844155 | A   | 394 | 1.20 | 0.18 | 3.1E-01 | A                        | 292 | 1.02 | 0.23 | 9.3E-01 | A             | 281 | 1.52 | 0.22 | 6.1E-02 |
| rs2229181 | ADRA1B  | 5   | 159276661 | T   | 390 | 1.63 | 0.38 | 2.0E-01 | T                        | 288 | 1.38 | 0.46 | 4.8E-01 | T             | 278 | 1.74 | 0.45 | 2.2E-01 |
| rs2229579 | CNR2    | 1   | 24073749  | A   | 394 | 0.97 | 0.23 | 9.1E-01 | A                        | 292 | 0.82 | 0.30 | 5.1E-01 | A             | 281 | 1.14 | 0.27 | 6.2E-01 |
| rs2229580 | CNR2    | 1   | 24073696  | C   | 386 | 1.06 | 0.14 | 6.9E-01 | C                        | 286 | 1.28 | 0.17 | 1.6E-01 | C             | 276 | 0.88 | 0.18 | 4.9E-01 |
| rs2229894 | SLC1A3  | 5   | 36722161  | A   | 394 | 0.98 | 0.15 | 8.8E-01 | A                        | 292 | 0.80 | 0.19 | 2.6E-01 | A             | 281 | 1.26 | 0.19 | 2.4E-01 |
| rs2229910 | NTRK3   | 15  | 86377189  | C   | 394 | 1.16 | 0.14 | 2.9E-01 | C                        | 292 | 1.15 | 0.17 | 4.1E-01 | C             | 281 | 1.21 | 0.18 | 3.0E-01 |
| rs2229940 | GABRA4  | 4   | 46690123  | T   | 393 | 1.15 | 0.15 | 3.3E-01 | T                        | 291 | 1.11 | 0.18 | 5.4E-01 | T             | 280 | 1.13 | 0.18 | 5.2E-01 |
| rs2229944 | GABRB2  | 5   | 160653897 | A   | 393 | 0.87 | 0.31 | 6.6E-01 | A                        | 292 | 0.85 | 0.37 | 6.7E-01 | A             | 280 | 0.89 | 0.39 | 7.5E-01 |
| rs2230493 | PRKCD   | 3   | 53188697  | C   | 394 | 0.94 | 0.18 | 7.2E-01 | C                        | 292 | 0.71 | 0.23 | 1.3E-01 | C             | 281 | 1.15 | 0.21 | 5.2E-01 |
| rs2230674 | ATF1    | 12  | 49494389  | G   | 394 | 0.77 | 0.42 | 5.4E-01 | G                        | 292 | 0.76 | 0.52 | 6.1E-01 | G             | 281 | 0.85 | 0.52 | 7.5E-01 |
| rs2230912 | P2RX7   | 12  | 120106579 | G   | 394 | 1.16 | 0.21 | 4.7E-01 | G                        | 292 | 1.36 | 0.25 | 2.1E-01 | G             | 281 | 1.09 | 0.27 | 7.5E-01 |
| rs2231164 | AIM     | 4   | 89234881  | C   | 394 | 1.08 | 0.20 | 6.9E-01 | C                        | 292 | 0.91 | 0.25 | 7.2E-01 | C             | 281 | 1.29 | 0.23 | 2.8E-01 |
| rs2233409 | NFKBIA  | 14  | 34944021  | A   | 393 | 0.95 | 0.17 | 7.7E-01 | A                        | 291 | 1.04 | 0.20 | 8.7E-01 | A             | 281 | 0.85 | 0.21 | 4.4E-01 |
| rs2233419 | NFKBIA  | 14  | 34941711  | A   | 394 | 0.97 | 0.18 | 8.6E-01 | A                        | 292 | 1.06 | 0.21 | 7.9E-01 | A             | 281 | 0.84 | 0.23 | 4.5E-01 |
| rs2233647 | PACSIN1 | 6   | 34614982  | T   | 380 | 0.72 | 0.48 | 4.9E-01 | T                        | 282 | 1.11 | 0.54 | 8.5E-01 | T             | 270 | 0.55 | 0.75 | 4.3E-01 |
| rs2234676 | IL1RN   | 2   | 113591899 | A   | 394 | 1.02 | 0.15 | 8.8E-01 | A                        | 292 | 1.03 | 0.18 | 8.8E-01 | A             | 281 | 1.04 | 0.20 | 8.4E-01 |
| rs2234759 | NPY2R   | 4   | 156349007 | G   | 393 | 0.83 | 0.17 | 2.6E-01 | G                        | 291 | 0.73 | 0.22 | 1.5E-01 | G             | 280 | 1.04 | 0.21 | 8.6E-01 |
| rs2234918 | OPRD1   | 1   | 29062184  | C   | 385 | 1.01 | 0.15 | 9.5E-01 | C                        | 285 | 1.01 | 0.18 | 9.7E-01 | C             | 276 | 1.00 | 0.19 | 9.9E-01 |
| rs2234988 | APP     | 21  | 26398958  | A   | 394 | 0.88 | 0.15 | 3.7E-01 | A                        | 292 | 0.91 | 0.18 | 5.8E-01 | A             | 281 | 0.86 | 0.19 | 4.1E-01 |
| rs2235067 | ABCB1   | 7   | 86987858  | T   | 394 | 0.93 | 0.22 | 7.4E-01 | T                        | 292 | 0.70 | 0.29 | 2.2E-01 | T             | 281 | 1.12 | 0.27 | 6.8E-01 |
| rs2235749 | PDYN    | 20  | 1907939   | A   | 394 | 1.02 | 0.17 | 9.3E-01 | A                        | 292 | 0.97 | 0.21 | 8.7E-01 | A             | 281 | 1.08 | 0.21 | 7.2E-01 |
| rs2236418 | GAD2    | 10  | 26545502  | G   | 393 | 0.96 | 0.19 | 8.2E-01 | G                        | 291 | 0.97 | 0.23 | 9.0E-01 | G             | 280 | 0.94 | 0.24 | 7.8E-01 |
| rs2236624 | ADORA2A | 22  | 23166024  | T   | 394 | 0.66 | 0.17 | 1.5E-02 | T                        | 292 | 0.74 | 0.21 | 1.5E-01 | T             | 281 | 0.61 | 0.22 | 2.6E-02 |
| rs2236781 | GABRB1  | 4   | 46729844  | G   | 394 | 0.90 | 0.15 | 4.6E-01 | G                        | 292 | 0.91 | 0.18 | 6.1E-01 | G             | 281 | 0.80 | 0.18 | 2.2E-01 |

| SNP       | GENE     | CHR | BP        | TMD |     |      |      |         | TMD with widespread pain |     |      |      |         | Localized TMD |     |      |      |         |
|-----------|----------|-----|-----------|-----|-----|------|------|---------|--------------------------|-----|------|------|---------|---------------|-----|------|------|---------|
|           |          |     |           | A1  | N   | OR   | SE   | P       | A1                       | N   | OR   | SE   | P       | A1            | N   | OR   | SE   | P       |
| rs2236857 | OPRD1    | 1   | 29034196  | C   | 392 | 1.30 | 0.16 | 1.1E-01 | C                        | 290 | 1.26 | 0.19 | 2.4E-01 | C             | 280 | 1.29 | 0.20 | 2.1E-01 |
| rs2236953 | CACNA2D2 | 3   | 50399186  | T   | 388 | 1.10 | 0.22 | 6.7E-01 | T                        | 286 | 0.98 | 0.27 | 9.5E-01 | T             | 278 | 1.16 | 0.26 | 5.6E-01 |
| rs2236956 | CACNA2D2 | 3   | 50415394  | C   | 393 | 1.04 | 0.20 | 8.6E-01 | C                        | 291 | 0.96 | 0.25 | 8.7E-01 | C             | 280 | 1.07 | 0.24 | 7.9E-01 |
| rs2236964 | CACNA2D2 | 3   | 50424066  | G   | 394 | 1.02 | 0.21 | 9.2E-01 | G                        | 292 | 0.92 | 0.25 | 7.5E-01 | G             | 281 | 1.07 | 0.25 | 7.7E-01 |
| rs2237093 | MAPK14   | 6   | 36143332  | T   | 394 | 0.60 | 0.25 | 4.2E-02 | T                        | 292 | 0.46 | 0.34 | 2.3E-02 | T             | 281 | 0.74 | 0.30 | 3.1E-01 |
| rs2237094 | MAPK14   | 6   | 36116122  | C   | 394 | 0.80 | 0.30 | 4.6E-01 | C                        | 292 | 0.85 | 0.39 | 6.7E-01 | C             | 281 | 0.96 | 0.39 | 9.2E-01 |
| rs2237292 | ETV1     | 7   | 13915042  | C   | 394 | 0.90 | 0.16 | 5.1E-01 | C                        | 292 | 0.89 | 0.20 | 5.6E-01 | C             | 281 | 0.98 | 0.21 | 9.4E-01 |
| rs2237526 | CACNA2D1 | 7   | 81850430  | T   | 394 | 1.08 | 0.16 | 6.4E-01 | T                        | 292 | 1.13 | 0.19 | 5.4E-01 | T             | 281 | 1.10 | 0.19 | 6.4E-01 |
| rs2237528 | CACNA2D1 | 7   | 81871256  | C   | 394 | 1.17 | 0.17 | 3.5E-01 | C                        | 292 | 1.34 | 0.20 | 1.4E-01 | C             | 281 | 0.97 | 0.22 | 8.7E-01 |
| rs2238914 | GLRA2    | 23  | 14522486  | T   | 393 | 1.09 | 0.15 | 5.6E-01 | T                        | 291 | 0.90 | 0.18 | 5.5E-01 | T             | 281 | 1.35 | 0.19 | 1.1E-01 |
| rs2239372 | PLAUR    | 19  | 48854794  | G   | 394 | 1.04 | 0.14 | 7.8E-01 | G                        | 292 | 1.08 | 0.17 | 6.5E-01 | G             | 281 | 0.94 | 0.18 | 7.2E-01 |
| rs2239448 | MAOA     | 23  | 43487623  | T   | 393 | 0.98 | 0.15 | 9.0E-01 | T                        | 291 | 1.02 | 0.18 | 9.1E-01 | T             | 280 | 0.89 | 0.19 | 5.5E-01 |
| rs2239801 | CACNA2D2 | 3   | 50377313  | G   | 392 | 1.38 | 0.23 | 1.7E-01 | G                        | 291 | 1.24 | 0.28 | 4.4E-01 | G             | 279 | 1.63 | 0.29 | 9.5E-02 |
| rs2240403 | CRHR2    | 7   | 30661727  | T   | 382 | 1.04 | 0.29 | 8.8E-01 | T                        | 282 | 1.23 | 0.34 | 5.4E-01 | T             | 273 | 0.83 | 0.39 | 6.2E-01 |
| rs2240793 | SLC6A7   | 5   | 149563493 | T   | 394 | 0.92 | 0.17 | 6.2E-01 | T                        | 292 | 0.91 | 0.20 | 6.5E-01 | T             | 281 | 0.83 | 0.21 | 4.0E-01 |
| rs2241054 | EGFR     | 7   | 55207473  | A   | 394 | 0.87 | 0.16 | 3.8E-01 | A                        | 292 | 0.89 | 0.19 | 5.4E-01 | A             | 281 | 0.79 | 0.21 | 2.5E-01 |
| rs2241083 | AIM      | 9   | 124854714 | T   | 394 | 0.79 | 0.21 | 2.6E-01 | T                        | 292 | 0.75 | 0.27 | 2.9E-01 | T             | 281 | 0.95 | 0.26 | 8.3E-01 |
| rs2241164 | GAD1     | 2   | 171394805 | C   | 394 | 1.12 | 0.15 | 4.5E-01 | C                        | 292 | 1.16 | 0.19 | 4.2E-01 | C             | 281 | 1.18 | 0.19 | 3.9E-01 |
| rs2241719 | TGFB1    | 19  | 46521421  | A   | 394 | 1.08 | 0.20 | 7.0E-01 | A                        | 292 | 1.07 | 0.23 | 7.7E-01 | A             | 281 | 1.01 | 0.25 | 9.6E-01 |
| rs2242480 | CYP3A4   | 7   | 99199402  | T   | 392 | 1.35 | 0.25 | 2.3E-01 | T                        | 290 | 1.67 | 0.28 | 6.9E-02 | T             | 280 | 1.04 | 0.32 | 9.0E-01 |
| rs2243250 | IL4      | 5   | 132037053 | T   | 394 | 0.60 | 0.21 | 1.6E-02 | T                        | 292 | 0.54 | 0.27 | 2.1E-02 | T             | 281 | 0.69 | 0.26 | 1.5E-01 |
| rs2243291 | IL4      | 5   | 132046882 | C   | 394 | 0.70 | 0.20 | 7.5E-02 | C                        | 292 | 0.69 | 0.25 | 1.3E-01 | C             | 281 | 0.72 | 0.26 | 2.1E-01 |
| rs2245528 | GRIK1    | 21  | 30231933  | G   | 394 | 0.87 | 0.16 | 3.8E-01 | G                        | 292 | 0.74 | 0.20 | 1.3E-01 | G             | 281 | 0.99 | 0.19 | 9.6E-01 |
| rs2245532 | SLC6A11  | 3   | 10951876  | G   | 393 | 1.11 | 0.15 | 4.9E-01 | G                        | 291 | 1.22 | 0.18 | 2.9E-01 | G             | 280 | 1.02 | 0.18 | 9.1E-01 |
| rs2247445 | EPHB4    | 7   | 100265199 | A   | 385 | 1.03 | 0.17 | 8.9E-01 | A                        | 283 | 1.06 | 0.21 | 7.8E-01 | A             | 275 | 1.05 | 0.21 | 8.2E-01 |
| rs2248069 | CACNA1A  | 19  | 13306208  | C   | 394 | 1.07 | 0.15 | 6.5E-01 | C                        | 292 | 1.07 | 0.18 | 7.3E-01 | C             | 281 | 1.04 | 0.19 | 8.4E-01 |
| rs2248898 | RUNX1    | 21  | 36276009  | A   | 386 | 0.86 | 0.15 | 3.1E-01 | A                        | 286 | 0.70 | 0.19 | 6.0E-02 | A             | 276 | 0.98 | 0.19 | 9.2E-01 |
| rs2248989 | GRIK1    | 21  | 29865858  | A   | 394 | 0.87 | 0.16 | 3.7E-01 | A                        | 292 | 0.75 | 0.21 | 1.5E-01 | A             | 281 | 1.03 | 0.21 | 8.8E-01 |
| rs2249233 | RUNX1    | 21  | 36278976  | T   | 393 | 0.84 | 0.15 | 2.6E-01 | T                        | 291 | 0.68 | 0.19 | 4.0E-02 | T             | 280 | 0.99 | 0.19 | 9.4E-01 |
| rs2252430 | MAPK13   | 6   | 36211899  | G   | 394 | 1.73 | 0.36 | 1.2E-01 | G                        | 292 | 1.78 | 0.41 | 1.6E-01 | G             | 281 | 1.50 | 0.44 | 3.5E-01 |
| rs2252697 | ADRA2B   | 2   | 96141917  | G   | 389 | 0.94 | 0.15 | 6.7E-01 | G                        | 288 | 0.89 | 0.19 | 5.2E-01 | G             | 277 | 1.04 | 0.19 | 8.2E-01 |
| rs2253206 | CREB1    | 2   | 208100223 | A   | 394 | 0.85 | 0.15 | 2.7E-01 | A                        | 292 | 0.82 | 0.18 | 2.8E-01 | A             | 281 | 0.87 | 0.19 | 4.5E-01 |
| rs2255071 | TAAR8    | 6   | 132922341 | T   | 389 | 0.92 | 0.16 | 6.0E-01 | T                        | 289 | 0.92 | 0.19 | 6.5E-01 | T             | 276 | 0.95 | 0.21 | 8.1E-01 |
| rs2265    | NTRK2    | 9   | 86521426  | C   | 393 | 1.00 | 0.14 | 1.0E+00 | C                        | 291 | 1.04 | 0.18 | 8.4E-01 | C             | 281 | 1.00 | 0.18 | 9.9E-01 |
| rs2266968 | MAPK1    | 22  | 20503358  | A   | 393 | 0.81 | 0.38 | 5.7E-01 | A                        | 291 | 0.51 | 0.52 | 1.9E-01 | A             | 280 | 1.07 | 0.43 | 8.7E-01 |
| rs2267076 | ADORA2A  | 22  | 23160595  | T   | 394 | 0.61 | 0.16 | 2.2E-03 | T                        | 292 | 0.66 | 0.20 | 4.4E-02 | T             | 281 | 0.61 | 0.20 | 1.4E-02 |
| rs2267633 | GABBR1   | 6   | 29678820  | G   | 394 | 0.98 | 0.21 | 9.2E-01 | G                        | 292 | 0.82 | 0.27 | 4.5E-01 | G             | 281 | 1.19 | 0.25 | 4.7E-01 |
| rs2268125 | GRIN2B   | 12  | 13831350  | G   | 379 | 0.68 | 0.17 | 2.4E-02 | G                        | 281 | 0.48 | 0.23 | 1.5E-03 | G             | 270 | 0.91 | 0.21 | 6.7E-01 |
| rs2268130 | GRIN2B   | 12  | 13859885  | C   | 394 | 0.84 | 0.21 | 4.1E-01 | C                        | 292 | 0.68 | 0.29 | 1.8E-01 | C             | 281 | 1.12 | 0.25 | 6.4E-01 |

| SNP       | GENE     | CHR | BP        | TMD |     |      |      |         | TMD with widespread pain |     |      |      |         | Localized TMD |     |      |      |         |
|-----------|----------|-----|-----------|-----|-----|------|------|---------|--------------------------|-----|------|------|---------|---------------|-----|------|------|---------|
|           |          |     |           | A1  | N   | OR   | SE   | P       | A1                       | N   | OR   | SE   | P       | A1            | N   | OR   | SE   | P       |
| rs2268278 | RUNX1    | 21  | 35106809  | A   | 394 | 0.78 | 0.15 | 9.8E-02 | A                        | 292 | 0.90 | 0.18 | 5.7E-01 | A             | 281 | 0.70 | 0.20 | 6.3E-02 |
| rs2268290 | RUNX1    | 21  | 35158386  | A   | 393 | 0.99 | 0.18 | 9.5E-01 | A                        | 291 | 1.02 | 0.22 | 9.3E-01 | A             | 281 | 0.91 | 0.23 | 6.9E-01 |
| rs2268666 | GRM1     | 6   | 146787781 | C   | 394 | 0.95 | 0.14 | 6.8E-01 | C                        | 292 | 0.91 | 0.17 | 5.8E-01 | C             | 281 | 1.02 | 0.17 | 9.2E-01 |
| rs2268894 | DPP4     | 2   | 162564394 | C   | 394 | 1.08 | 0.14 | 5.7E-01 | C                        | 292 | 1.17 | 0.17 | 3.5E-01 | C             | 281 | 1.01 | 0.18 | 9.6E-01 |
| rs2269272 | SLC1A3   | 5   | 36723613  | T   | 394 | 0.84 | 0.19 | 3.6E-01 | T                        | 292 | 0.63 | 0.24 | 5.6E-02 | T             | 281 | 1.13 | 0.23 | 6.0E-01 |
| rs2270935 | SLC6A2   | 16  | 54276385  | T   | 393 | 1.01 | 0.48 | 9.9E-01 | T                        | 291 | 1.27 | 0.55 | 6.7E-01 | T             | 281 | 0.86 | 0.70 | 8.3E-01 |
| rs2272395 | SLC6A11  | 3   | 10942739  | C   | 393 | 1.10 | 0.14 | 5.1E-01 | C                        | 291 | 1.11 | 0.17 | 5.4E-01 | C             | 280 | 1.13 | 0.17 | 4.9E-01 |
| rs2273653 | STAU1    | 20  | 47204163  | C   | 394 | 1.05 | 0.15 | 7.6E-01 | C                        | 292 | 1.22 | 0.18 | 2.9E-01 | C             | 281 | 0.92 | 0.19 | 6.8E-01 |
| rs2273815 | PRKD1    | 14  | 29117331  | C   | 394 | 1.33 | 0.17 | 9.4E-02 | C                        | 292 | 1.73 | 0.20 | 5.7E-03 | C             | 281 | 0.98 | 0.23 | 9.3E-01 |
| rs2274856 | MPDZ     | 9   | 13166312  | T   | 394 | 0.89 | 0.16 | 4.7E-01 | T                        | 292 | 0.86 | 0.20 | 4.4E-01 | T             | 281 | 0.96 | 0.20 | 8.4E-01 |
| rs2274976 | MTHFR    | 1   | 11773514  | T   | 394 | 0.90 | 0.33 | 7.5E-01 | T                        | 292 | 1.05 | 0.39 | 9.0E-01 | T             | 281 | 0.85 | 0.43 | 7.0E-01 |
| rs2275797 | ADORA3   | 1   | 111834808 | C   | 393 | 0.91 | 0.29 | 7.6E-01 | C                        | 291 | 0.90 | 0.37 | 7.7E-01 | C             | 280 | 1.01 | 0.38 | 9.9E-01 |
| rs2276008 | MAPK1    | 22  | 20444036  | C   | 394 | 2.52 | 0.43 | 3.3E-02 | C                        | 292 | 1.14 | 0.58 | 8.3E-01 | C             | 281 | 3.99 | 0.46 | 2.8E-03 |
| rs2276038 | P2RX3    | 11  | 56894000  | T   | 394 | 0.93 | 0.14 | 6.1E-01 | T                        | 292 | 1.15 | 0.17 | 4.3E-01 | T             | 281 | 0.74 | 0.18 | 9.6E-02 |
| rs2276039 | P2RX3    | 11  | 56893947  | A   | 393 | 0.95 | 0.15 | 7.2E-01 | A                        | 291 | 1.19 | 0.18 | 3.3E-01 | A             | 280 | 0.76 | 0.19 | 1.4E-01 |
| rs2276317 | VPS4B    | 18  | 59217443  | G   | 394 | 0.95 | 0.14 | 7.3E-01 | G                        | 292 | 1.09 | 0.17 | 6.2E-01 | G             | 281 | 0.85 | 0.17 | 3.6E-01 |
| rs2276643 | ACCN4    | 2   | 220108195 | G   | 383 | 1.58 | 0.18 | 1.1E-02 | G                        | 284 | 1.54 | 0.21 | 3.7E-02 | G             | 274 | 1.63 | 0.22 | 3.0E-02 |
| rs2277193 | NTRK2    | 9   | 86763829  | C   | 394 | 1.08 | 0.14 | 6.2E-01 | C                        | 292 | 0.95 | 0.18 | 8.0E-01 | C             | 281 | 1.15 | 0.18 | 4.3E-01 |
| rs2277675 | TRPV1    | 17  | 3447259   | C   | 393 | 1.01 | 0.16 | 9.7E-01 | C                        | 291 | 1.03 | 0.19 | 8.6E-01 | C             | 280 | 0.98 | 0.21 | 9.2E-01 |
| rs2278071 | CHRM2    | 7   | 136233540 | C   | 394 | 1.21 | 0.17 | 2.5E-01 | C                        | 292 | 1.35 | 0.20 | 1.3E-01 | C             | 281 | 1.08 | 0.21 | 7.2E-01 |
| rs2281285 | PDYN     | 20  | 1920460   | C   | 391 | 0.94 | 0.21 | 7.6E-01 | C                        | 289 | 0.90 | 0.26 | 6.8E-01 | C             | 278 | 0.95 | 0.26 | 8.4E-01 |
| rs2281547 | XDH      | 2   | 31452327  | C   | 394 | 0.82 | 0.16 | 2.1E-01 | C                        | 292 | 0.69 | 0.20 | 6.3E-02 | C             | 281 | 0.97 | 0.20 | 8.7E-01 |
| rs2282754 | CACNA2D2 | 3   | 50411831  | C   | 394 | 0.98 | 0.20 | 9.2E-01 | C                        | 292 | 0.87 | 0.25 | 5.7E-01 | C             | 281 | 1.05 | 0.24 | 8.4E-01 |
| rs2283791 | MAPK1    | 22  | 20460945  | G   | 394 | 1.15 | 0.14 | 3.3E-01 | G                        | 292 | 0.97 | 0.17 | 8.8E-01 | G             | 281 | 1.34 | 0.17 | 8.9E-02 |
| rs2284217 | CRHR2    | 7   | 30680133  | A   | 378 | 1.17 | 0.19 | 4.0E-01 | A                        | 280 | 1.12 | 0.24 | 6.4E-01 | A             | 268 | 1.32 | 0.23 | 2.3E-01 |
| rs2284220 | CRHR2    | 7   | 30684628  | G   | 394 | 0.96 | 0.20 | 8.4E-01 | G                        | 292 | 0.78 | 0.27 | 3.5E-01 | G             | 281 | 1.22 | 0.24 | 4.3E-01 |
| rs2284239 | GRIN2A   | 16  | 9829003   | C   | 394 | 1.11 | 0.16 | 5.1E-01 | C                        | 292 | 1.16 | 0.19 | 4.4E-01 | C             | 281 | 1.13 | 0.20 | 5.4E-01 |
| rs2284402 | GRIN2B   | 12  | 13667225  | G   | 391 | 0.93 | 0.15 | 6.2E-01 | G                        | 289 | 0.92 | 0.18 | 6.5E-01 | G             | 279 | 0.92 | 0.19 | 6.7E-01 |
| rs2284406 | GRIN2B   | 12  | 13716683  | C   | 394 | 1.02 | 0.15 | 8.8E-01 | C                        | 292 | 1.09 | 0.18 | 6.5E-01 | C             | 281 | 1.02 | 0.20 | 9.4E-01 |
| rs2284411 | GRIN2B   | 12  | 13757439  | T   | 394 | 0.96 | 0.16 | 8.1E-01 | T                        | 292 | 0.96 | 0.20 | 8.4E-01 | T             | 281 | 0.98 | 0.20 | 9.2E-01 |
| rs2284613 | RUNX1    | 21  | 35140134  | G   | 393 | 0.82 | 0.15 | 1.9E-01 | G                        | 291 | 0.85 | 0.18 | 3.6E-01 | G             | 280 | 0.80 | 0.19 | 2.2E-01 |
| rs2285096 | PDGFB    | 22  | 37952336  | C   | 389 | 1.10 | 0.15 | 5.1E-01 | C                        | 289 | 0.98 | 0.19 | 9.2E-01 | C             | 277 | 1.15 | 0.18 | 4.5E-01 |
| rs2285676 | KCNJ11   | 11  | 17364601  | G   | 394 | 0.99 | 0.15 | 9.4E-01 | G                        | 292 | 1.02 | 0.17 | 9.0E-01 | G             | 281 | 0.91 | 0.19 | 6.0E-01 |
| rs2287715 | GNB2L1   | 5   | 180601976 | G   | 394 | 1.25 | 0.17 | 1.9E-01 | G                        | 292 | 1.31 | 0.21 | 2.0E-01 | G             | 281 | 1.31 | 0.21 | 1.9E-01 |
| rs2288337 | HNRNPD   | 4   | 83514940  | A   | 394 | 1.24 | 0.20 | 2.8E-01 | A                        | 292 | 1.19 | 0.24 | 4.7E-01 | A             | 281 | 1.32 | 0.24 | 2.4E-01 |
| rs2288338 | HNRNPD   | 4   | 83493658  | T   | 392 | 1.27 | 0.16 | 1.3E-01 | T                        | 290 | 1.23 | 0.19 | 2.8E-01 | T             | 279 | 1.27 | 0.19 | 2.1E-01 |
| rs2288397 | CAMK4    | 5   | 110634040 | T   | 393 | 0.96 | 0.18 | 8.3E-01 | T                        | 291 | 1.14 | 0.22 | 5.4E-01 | T             | 280 | 0.76 | 0.24 | 2.6E-01 |
| rs2288645 | ACCN3    | 7   | 150378679 | A   | 391 | 0.89 | 0.18 | 5.4E-01 | A                        | 291 | 1.01 | 0.22 | 9.5E-01 | A             | 280 | 0.71 | 0.24 | 1.5E-01 |
| rs2289658 | NTRK2    | 9   | 86753190  | C   | 393 | 0.60 | 0.33 | 1.2E-01 | C                        | 291 | 0.33 | 0.51 | 3.0E-02 | C             | 281 | 0.88 | 0.38 | 7.4E-01 |

| SNP       | GENE      | CHR | BP        | TMD |     |      |      |         | TMD with widespread pain |     |      |      |         | Localized TMD |     |      |      |         |
|-----------|-----------|-----|-----------|-----|-----|------|------|---------|--------------------------|-----|------|------|---------|---------------|-----|------|------|---------|
|           |           |     |           | A1  | N   | OR   | SE   | P       | A1                       | N   | OR   | SE   | P       | A1            | N   | OR   | SE   | P       |
| rs2289948 | DBI       | 2   | 119846668 | C   | 394 | 0.77 | 0.17 | 1.3E-01 | C                        | 292 | 0.62 | 0.23 | 3.3E-02 | C             | 281 | 0.92 | 0.21 | 6.8E-01 |
| rs2289954 | SLC6A13   | 12  | 202623    | T   | 394 | 1.06 | 0.17 | 7.3E-01 | T                        | 292 | 1.00 | 0.21 | 9.8E-01 | T             | 281 | 1.22 | 0.21 | 3.6E-01 |
| rs2289957 | SLC6A13   | 12  | 217329    | T   | 390 | 0.81 | 0.14 | 1.5E-01 | T                        | 289 | 0.83 | 0.18 | 3.0E-01 | T             | 279 | 0.78 | 0.18 | 1.7E-01 |
| rs2292898 | ACSL1     | 4   | 185923026 | C   | 394 | 0.96 | 0.16 | 8.1E-01 | C                        | 292 | 1.09 | 0.19 | 6.5E-01 | C             | 281 | 0.77 | 0.20 | 1.9E-01 |
| rs2293052 | NOS1      | 12  | 116200003 | A   | 394 | 0.97 | 0.15 | 8.2E-01 | A                        | 292 | 0.83 | 0.18 | 3.1E-01 | A             | 281 | 1.10 | 0.18 | 6.1E-01 |
| rs2293054 | NOS1      | 12  | 116186097 | A   | 394 | 0.95 | 0.16 | 7.5E-01 | A                        | 292 | 1.15 | 0.19 | 4.7E-01 | A             | 281 | 0.76 | 0.20 | 1.7E-01 |
| rs2293347 | EGFR      | 7   | 55236410  | T   | 394 | 0.91 | 0.24 | 7.2E-01 | T                        | 292 | 0.84 | 0.30 | 5.8E-01 | T             | 281 | 1.01 | 0.30 | 9.7E-01 |
| rs2294100 | IKKBK     | 8   | 42294460  | A   | 391 | 0.60 | 0.31 | 9.7E-02 | A                        | 289 | 0.50 | 0.40 | 8.3E-02 | A             | 279 | 0.70 | 0.38 | 3.4E-01 |
| rs2295475 | XDH       | 2   | 31443351  | A   | 394 | 1.05 | 0.16 | 7.6E-01 | A                        | 292 | 1.02 | 0.19 | 9.2E-01 | A             | 281 | 1.09 | 0.19 | 6.4E-01 |
| rs2295621 | KCNJ9     | 1   | 158329351 | G   | 394 | 1.36 | 0.19 | 1.1E-01 | G                        | 292 | 1.44 | 0.23 | 1.2E-01 | G             | 281 | 1.35 | 0.24 | 2.1E-01 |
| rs2295633 | FAAH      | 1   | 46646970  | A   | 394 | 1.19 | 0.15 | 2.4E-01 | A                        | 292 | 1.18 | 0.18 | 3.6E-01 | A             | 281 | 1.18 | 0.18 | 3.8E-01 |
| rs2296575 | PACSIN1   | 6   | 34605945  | A   | 394 | 0.56 | 0.64 | 3.7E-01 | A                        | 292 | 0.90 | 0.72 | 8.8E-01 | A             | 281 | 0.33 | 1.09 | 3.1E-01 |
| rs2296972 | HTR2A     | 13  | 46326472  | A   | 393 | 0.95 | 0.16 | 7.3E-01 | A                        | 291 | 1.07 | 0.19 | 7.2E-01 | A             | 281 | 0.80 | 0.20 | 2.5E-01 |
| rs2297025 | GBP2      | 1   | 89355290  | G   | 393 | 0.66 | 0.54 | 4.4E-01 | G                        | 292 | 0.27 | 1.03 | 2.0E-01 | G             | 280 | 1.02 | 0.58 | 9.7E-01 |
| rs2297518 | NOS2A     | 17  | 23120724  | A   | 394 | 0.81 | 0.19 | 2.7E-01 | A                        | 292 | 0.80 | 0.23 | 3.2E-01 | A             | 281 | 0.81 | 0.24 | 3.8E-01 |
| rs2298432 | MAPK1     | 22  | 20453189  | A   | 394 | 0.90 | 0.14 | 4.8E-01 | A                        | 292 | 1.04 | 0.17 | 8.4E-01 | A             | 281 | 0.78 | 0.19 | 1.9E-01 |
| rs2298734 | MAP2K1IP1 | 4   | 101035123 | A   | 392 | 0.88 | 0.53 | 8.1E-01 | A                        | 292 | 1.53 | 0.62 | 4.9E-01 | A             | 279 | 0.68 | 0.83 | 6.4E-01 |
| rs2298771 | SCN1A     | 2   | 166601034 | C   | 394 | 1.23 | 0.15 | 1.8E-01 | C                        | 292 | 0.96 | 0.20 | 8.4E-01 | C             | 281 | 1.50 | 0.18 | 2.7E-02 |
| rs2298895 | OPRD1     | 1   | 29051511  | T   | 394 | 0.74 | 0.35 | 3.9E-01 | T                        | 292 | 0.66 | 0.45 | 3.6E-01 | T             | 281 | 0.85 | 0.43 | 7.0E-01 |
| rs2298896 | OPRD1     | 1   | 29038725  | G   | 394 | 1.24 | 0.15 | 1.7E-01 | G                        | 292 | 1.21 | 0.19 | 3.0E-01 | G             | 281 | 1.21 | 0.19 | 3.3E-01 |
| rs2300164 | PTGER3    | 1   | 71226940  | T   | 394 | 0.82 | 0.18 | 2.7E-01 | T                        | 292 | 0.73 | 0.23 | 1.8E-01 | T             | 281 | 0.84 | 0.23 | 4.4E-01 |
| rs2300181 | CAT       | 11  | 34433115  | T   | 393 | 0.95 | 0.16 | 7.7E-01 | T                        | 291 | 0.97 | 0.20 | 8.9E-01 | T             | 280 | 0.94 | 0.20 | 7.7E-01 |
| rs2300400 | RUNX1     | 21  | 35176677  | C   | 394 | 1.33 | 0.17 | 9.3E-02 | C                        | 292 | 1.41 | 0.20 | 8.6E-02 | C             | 281 | 1.23 | 0.22 | 3.4E-01 |
| rs2300626 | GRM1      | 6   | 146771510 | G   | 394 | 0.91 | 0.43 | 8.3E-01 | G                        | 292 | 1.52 | 0.47 | 3.7E-01 | G             | 281 | 0.35 | 0.78 | 1.8E-01 |
| rs2300755 | DPP4      | 2   | 162592208 | A   | 394 | 1.06 | 0.15 | 7.1E-01 | A                        | 292 | 1.12 | 0.18 | 5.3E-01 | A             | 281 | 0.98 | 0.19 | 9.2E-01 |
| rs2300782 | CAMK4     | 5   | 110816684 | T   | 394 | 0.92 | 0.14 | 5.8E-01 | T                        | 292 | 0.80 | 0.18 | 2.0E-01 | T             | 281 | 1.07 | 0.17 | 7.1E-01 |
| rs2300880 | PRKD3     | 2   | 37390989  | G   | 394 | 0.93 | 0.14 | 6.2E-01 | G                        | 292 | 0.96 | 0.17 | 8.3E-01 | G             | 281 | 0.94 | 0.18 | 7.1E-01 |
| rs2301106 | HIF1A     | 14  | 61236316  | C   | 393 | 0.76 | 0.20 | 1.8E-01 | C                        | 291 | 0.95 | 0.23 | 8.4E-01 | C             | 280 | 0.52 | 0.29 | 2.3E-02 |
| rs2302524 | PLAUR     | 19  | 48848312  | C   | 392 | 0.98 | 0.19 | 9.3E-01 | C                        | 291 | 0.83 | 0.24 | 4.4E-01 | C             | 279 | 1.19 | 0.22 | 4.4E-01 |
| rs2302650 | PRKD3     | 2   | 37348095  | G   | 394 | 1.08 | 0.20 | 6.9E-01 | G                        | 292 | 0.68 | 0.27 | 1.5E-01 | G             | 281 | 1.52 | 0.23 | 7.3E-02 |
| rs2303432 | OPRK1     | 8   | 54319770  | A   | 394 | 0.75 | 0.25 | 2.6E-01 | A                        | 292 | 0.85 | 0.30 | 5.9E-01 | A             | 281 | 0.67 | 0.34 | 2.4E-01 |
| rs2303928 | ACCN3     | 7   | 150370263 | G   | 392 | 0.69 | 0.16 | 1.9E-02 | G                        | 290 | 0.70 | 0.19 | 5.8E-02 | G             | 281 | 0.64 | 0.20 | 2.6E-02 |
| rs2303998 | P2RX4     | 12  | 120139446 | A   | 394 | 1.00 | 0.54 | 1.0E+00 | A                        | 292 | 1.31 | 0.60 | 6.6E-01 | A             | 281 | 0.57 | 0.81 | 4.9E-01 |
| rs2304389 | GABBR2    | 9   | 100108401 | A   | 394 | 1.21 | 0.20 | 3.3E-01 | A                        | 292 | 1.14 | 0.24 | 5.8E-01 | A             | 281 | 1.37 | 0.24 | 2.0E-01 |
| rs2304595 | KLKB1     | 4   | 187409274 | A   | 394 | 1.40 | 0.15 | 2.3E-02 | A                        | 292 | 1.34 | 0.18 | 1.1E-01 | A             | 281 | 1.39 | 0.19 | 7.8E-02 |
| rs2304725 | SLC6A11   | 3   | 10860920  | C   | 390 | 0.87 | 0.15 | 3.7E-01 | C                        | 288 | 0.93 | 0.18 | 7.1E-01 | C             | 277 | 0.75 | 0.19 | 1.4E-01 |
| rs2306574 | PRKCD     | 3   | 53197801  | C   | 394 | 1.22 | 0.18 | 2.7E-01 | C                        | 292 | 1.42 | 0.22 | 1.1E-01 | C             | 281 | 1.11 | 0.23 | 6.6E-01 |
| rs2306630 | CCL5      | 17  | 31206454  | A   | 394 | 1.00 | 0.20 | 1.0E+00 | A                        | 292 | 0.89 | 0.26 | 6.6E-01 | A             | 281 | 1.14 | 0.24 | 6.0E-01 |
| rs2307023 | KCNJ8     | 12  | 21804552  | G   | 394 | 1.18 | 0.15 | 2.7E-01 | G                        | 292 | 1.14 | 0.18 | 4.5E-01 | G             | 281 | 1.20 | 0.18 | 3.3E-01 |

| SNP       | GENE     | CHR | BP        | TMD |     |      |      |         | TMD with widespread pain |     |      |      |         | Localized TMD |     |      |      |         |
|-----------|----------|-----|-----------|-----|-----|------|------|---------|--------------------------|-----|------|------|---------|---------------|-----|------|------|---------|
|           |          |     |           | A1  | N   | OR   | SE   | P       | A1                       | N   | OR   | SE   | P       | A1            | N   | OR   | SE   | P       |
| rs2307198 | PLA2G4A  | 1   | 185213535 | G   | 393 | 1.21 | 0.61 | 7.5E-01 | G                        | 291 | 0.72 | 0.85 | 7.0E-01 | G             | 281 | 1.65 | 0.68 | 4.7E-01 |
| rs2323973 | P2RX2    | 12  | 131695746 | G   | 393 | 1.16 | 0.19 | 4.3E-01 | G                        | 291 | 1.03 | 0.23 | 9.0E-01 | G             | 280 | 1.30 | 0.23 | 2.4E-01 |
| rs2328729 | GRM1     | 6   | 146561084 | A   | 394 | 1.10 | 0.31 | 7.6E-01 | A                        | 292 | 1.27 | 0.36 | 5.0E-01 | A             | 281 | 0.91 | 0.40 | 8.1E-01 |
| rs2329341 | DDC      | 7   | 50587769  | C   | 394 | 1.16 | 0.15 | 3.2E-01 | C                        | 292 | 1.38 | 0.18 | 7.6E-02 | C             | 281 | 0.94 | 0.19 | 7.6E-01 |
| rs2330951 | EGFR     | 7   | 55141836  | C   | 394 | 1.15 | 0.17 | 4.0E-01 | C                        | 292 | 1.22 | 0.20 | 3.2E-01 | C             | 281 | 1.16 | 0.22 | 5.1E-01 |
| rs2339630 | PRKG1    | 10  | 52548730  | A   | 394 | 0.55 | 0.21 | 5.3E-03 | A                        | 292 | 0.58 | 0.26 | 3.7E-02 | A             | 281 | 0.51 | 0.28 | 1.7E-02 |
| rs2345275 | AIM      | 4   | 158944273 | C   | 393 | 1.00 | 0.15 | 9.9E-01 | C                        | 291 | 1.00 | 0.18 | 9.8E-01 | C             | 280 | 0.99 | 0.19 | 9.4E-01 |
| rs2347867 | ESR1     | 6   | 152271543 | G   | 392 | 1.00 | 0.16 | 1.0E+00 | G                        | 290 | 0.90 | 0.20 | 6.0E-01 | G             | 280 | 1.08 | 0.20 | 7.1E-01 |
| rs2350786 | CHRM2    | 7   | 136327110 | A   | 394 | 1.42 | 0.16 | 2.3E-02 | A                        | 292 | 1.34 | 0.19 | 1.3E-01 | A             | 281 | 1.54 | 0.19 | 2.2E-02 |
| rs2363557 | KCNK2    | 1   | 213387083 | A   | 394 | 1.20 | 0.17 | 2.8E-01 | A                        | 292 | 1.48 | 0.20 | 4.8E-02 | A             | 281 | 1.00 | 0.22 | 9.9E-01 |
| rs2363561 | KCNK2    | 1   | 213321930 | T   | 394 | 0.95 | 0.14 | 7.2E-01 | T                        | 292 | 1.14 | 0.18 | 4.6E-01 | T             | 281 | 0.83 | 0.18 | 3.2E-01 |
| rs2363563 | KCNK2    | 1   | 213352729 | G   | 394 | 1.12 | 0.14 | 4.3E-01 | G                        | 292 | 0.90 | 0.18 | 5.5E-01 | G             | 281 | 1.35 | 0.18 | 1.0E-01 |
| rs2363565 | KCNK2    | 1   | 213400702 | G   | 394 | 1.08 | 0.15 | 6.1E-01 | G                        | 292 | 1.35 | 0.18 | 8.7E-02 | G             | 281 | 0.88 | 0.19 | 5.1E-01 |
| rs2365738 | INADL    | 1   | 62241986  | A   | 394 | 0.82 | 0.18 | 2.7E-01 | A                        | 292 | 0.77 | 0.23 | 2.5E-01 | A             | 281 | 0.87 | 0.23 | 5.4E-01 |
| rs2367707 | EREG     | 4   | 75467298  | A   | 394 | 0.88 | 0.17 | 4.6E-01 | A                        | 292 | 0.87 | 0.20 | 4.8E-01 | A             | 281 | 0.79 | 0.21 | 2.7E-01 |
| rs2367912 | CACNA2D1 | 7   | 81658997  | C   | 394 | 0.99 | 0.17 | 9.3E-01 | C                        | 292 | 0.95 | 0.20 | 7.9E-01 | C             | 281 | 0.99 | 0.21 | 9.4E-01 |
| rs2376481 | GABRG3   | 15  | 24803459  | A   | 394 | 0.91 | 0.14 | 5.2E-01 | A                        | 292 | 0.81 | 0.18 | 2.5E-01 | A             | 281 | 1.06 | 0.18 | 7.3E-01 |
| rs2376805 | GABRD    | 1   | 1946222   | G   | 393 | 0.99 | 0.20 | 9.7E-01 | G                        | 291 | 1.18 | 0.24 | 4.8E-01 | G             | 280 | 0.93 | 0.25 | 7.6E-01 |
| rs2378676 | NTRK2    | 9   | 86809243  | A   | 394 | 1.09 | 0.14 | 5.2E-01 | A                        | 292 | 0.97 | 0.17 | 8.7E-01 | A             | 281 | 1.19 | 0.18 | 3.4E-01 |
| rs2383515 | PTGS2    | 1   | 184919575 | T   | 394 | 1.26 | 0.21 | 2.6E-01 | T                        | 292 | 1.49 | 0.25 | 1.0E-01 | T             | 281 | 1.01 | 0.27 | 9.6E-01 |
| rs2388511 | AIM      | 10  | 3038498   | C   | 394 | 0.75 | 0.20 | 1.5E-01 | C                        | 292 | 0.65 | 0.25 | 9.3E-02 | C             | 281 | 0.82 | 0.24 | 4.2E-01 |
| rs2389717 | PRKACB   | 1   | 84466830  | T   | 394 | 1.25 | 0.18 | 2.1E-01 | T                        | 292 | 1.59 | 0.21 | 2.9E-02 | T             | 281 | 0.89 | 0.24 | 6.2E-01 |
| rs2390165 | SCN3A    | 2   | 165768165 | A   | 394 | 0.84 | 0.14 | 2.3E-01 | A                        | 292 | 0.79 | 0.18 | 1.8E-01 | A             | 281 | 0.84 | 0.17 | 3.0E-01 |
| rs2391333 | EFNB2    | 13  | 105964695 | T   | 393 | 1.07 | 0.15 | 6.4E-01 | T                        | 291 | 1.05 | 0.18 | 8.1E-01 | T             | 280 | 1.08 | 0.19 | 6.7E-01 |
| rs2395655 | CDKN1A   | 6   | 36753674  | G   | 394 | 0.98 | 0.15 | 8.8E-01 | G                        | 292 | 1.02 | 0.19 | 9.0E-01 | G             | 281 | 0.92 | 0.19 | 6.8E-01 |
| rs2400707 | ADRB2    | 5   | 148185245 | A   | 392 | 1.14 | 0.14 | 3.6E-01 | A                        | 291 | 1.09 | 0.17 | 6.2E-01 | A             | 279 | 1.26 | 0.17 | 1.8E-01 |
| rs2409710 | AIM      | 8   | 11017231  | A   | 394 | 0.98 | 0.14 | 8.9E-01 | A                        | 292 | 0.90 | 0.17 | 5.3E-01 | A             | 281 | 1.11 | 0.19 | 5.8E-01 |
| rs2409943 | KCNJ6    | 21  | 38166041  | C   | 394 | 0.91 | 0.15 | 5.1E-01 | C                        | 292 | 1.00 | 0.17 | 9.9E-01 | C             | 281 | 0.85 | 0.18 | 3.9E-01 |
| rs2410633 | ATP6V1B2 | 8   | 20105136  | T   | 389 | 1.03 | 0.16 | 8.4E-01 | T                        | 289 | 0.93 | 0.20 | 7.1E-01 | T             | 278 | 1.08 | 0.20 | 7.0E-01 |
| rs2416504 | AIM      | 5   | 117436991 | C   | 394 | 1.31 | 0.14 | 5.8E-02 | C                        | 292 | 1.42 | 0.17 | 4.4E-02 | C             | 281 | 1.23 | 0.18 | 2.5E-01 |
| rs2416791 | AIM      | 12  | 11592755  | A   | 394 | 1.02 | 0.21 | 9.2E-01 | A                        | 292 | 1.23 | 0.25 | 4.1E-01 | A             | 281 | 0.89 | 0.28 | 6.8E-01 |
| rs2419248 | CACNA1A  | 19  | 13292486  | T   | 394 | 1.03 | 0.16 | 8.7E-01 | T                        | 292 | 1.12 | 0.19 | 5.6E-01 | T             | 281 | 0.96 | 0.21 | 8.4E-01 |
| rs2426143 | STAU1    | 20  | 47234564  | C   | 393 | 1.09 | 0.22 | 6.9E-01 | C                        | 291 | 1.11 | 0.26 | 7.0E-01 | C             | 280 | 1.06 | 0.27 | 8.4E-01 |
| rs2427400 | NTSR1    | 20  | 60806120  | A   | 381 | 1.36 | 0.20 | 1.3E-01 | A                        | 283 | 1.22 | 0.25 | 4.2E-01 | A             | 271 | 1.52 | 0.24 | 8.1E-02 |
| rs2427430 | NTSR1    | 20  | 60836902  | G   | 390 | 0.87 | 0.15 | 3.3E-01 | G                        | 289 | 0.99 | 0.17 | 9.5E-01 | G             | 278 | 0.75 | 0.20 | 1.5E-01 |
| rs2427440 | NTSR1    | 20  | 60860875  | G   | 384 | 0.76 | 0.22 | 2.0E-01 | G                        | 283 | 0.73 | 0.27 | 2.5E-01 | G             | 275 | 0.79 | 0.28 | 4.0E-01 |
| rs242924  | CRHR1    | 17  | 41241147  | T   | 394 | 0.96 | 0.14 | 7.8E-01 | T                        | 292 | 0.94 | 0.17 | 7.0E-01 | T             | 281 | 0.94 | 0.18 | 7.2E-01 |
| rs2434722 | CAMK4    | 5   | 110612233 | G   | 394 | 0.99 | 0.16 | 9.4E-01 | G                        | 292 | 0.85 | 0.20 | 4.2E-01 | G             | 281 | 1.14 | 0.20 | 5.0E-01 |
| rs2435355 | RET      | 10  | 42944839  | C   | 394 | 1.11 | 0.17 | 5.5E-01 | C                        | 292 | 1.17 | 0.20 | 4.5E-01 | C             | 281 | 1.00 | 0.21 | 1.0E+00 |

| SNP       | GENE    | CHR | BP        | TMD |     |      |      |         | TMD with widespread pain |     |      |      |         | Localized TMD |     |      |      |         |
|-----------|---------|-----|-----------|-----|-----|------|------|---------|--------------------------|-----|------|------|---------|---------------|-----|------|------|---------|
|           |         |     |           | A1  | N   | OR   | SE   | P       | A1                       | N   | OR   | SE   | P       | A1            | N   | OR   | SE   | P       |
| rs2443168 | GALR2   | 17  | 71578042  | A   | 394 | 1.12 | 0.14 | 4.3E-01 | A                        | 292 | 1.25 | 0.18 | 2.0E-01 | A             | 281 | 0.96 | 0.18 | 8.3E-01 |
| rs246129  | VPS4A   | 16  | 67899282  | A   | 394 | 0.99 | 0.16 | 9.4E-01 | A                        | 292 | 0.96 | 0.19 | 8.1E-01 | A             | 281 | 0.95 | 0.20 | 8.1E-01 |
| rs2461491 | PPP3CC  | 8   | 22417197  | G   | 393 | 0.97 | 0.14 | 8.2E-01 | G                        | 291 | 1.03 | 0.18 | 8.9E-01 | G             | 281 | 0.89 | 0.18 | 5.4E-01 |
| rs2461641 | ZFAND6  | 15  | 78151811  | A   | 394 | 0.77 | 0.16 | 9.1E-02 | A                        | 292 | 0.76 | 0.19 | 1.5E-01 | A             | 281 | 0.67 | 0.20 | 4.8E-02 |
| rs246760  | AIM     | 5   | 5633216   | C   | 394 | 1.18 | 0.17 | 3.4E-01 | C                        | 292 | 1.22 | 0.20 | 3.4E-01 | C             | 281 | 1.03 | 0.22 | 8.9E-01 |
| rs2469749 | PPP3CC  | 8   | 22413543  | T   | 394 | 0.93 | 0.15 | 6.1E-01 | T                        | 292 | 0.86 | 0.18 | 4.1E-01 | T             | 281 | 1.03 | 0.18 | 8.7E-01 |
| rs2471347 | GRK4    | 4   | 3014233   | G   | 390 | 1.20 | 0.15 | 2.1E-01 | G                        | 289 | 1.18 | 0.18 | 3.7E-01 | G             | 278 | 1.11 | 0.18 | 5.6E-01 |
| rs2471350 | GRK4    | 4   | 2984117   | A   | 388 | 1.07 | 0.16 | 6.6E-01 | A                        | 287 | 0.95 | 0.19 | 8.0E-01 | A             | 276 | 1.15 | 0.19 | 4.8E-01 |
| rs2475376 | CYP2C9  | 10  | 96702390  | A   | 394 | 2.01 | 0.22 | 1.9E-03 | A                        | 292 | 2.18 | 0.27 | 3.9E-03 | A             | 281 | 2.08 | 0.27 | 7.1E-03 |
| rs2481676 | INADL   | 1   | 62400263  | G   | 394 | 1.08 | 0.15 | 6.1E-01 | G                        | 292 | 1.13 | 0.18 | 4.9E-01 | G             | 281 | 1.02 | 0.18 | 9.2E-01 |
| rs2486448 | AIM     | 9   | 71028805  | G   | 392 | 1.09 | 0.15 | 5.5E-01 | G                        | 290 | 1.09 | 0.18 | 6.4E-01 | G             | 279 | 1.18 | 0.19 | 3.8E-01 |
| rs2497510 | HTR2C   | 23  | 113919398 | A   | 393 | 0.83 | 0.20 | 3.4E-01 | A                        | 292 | 0.85 | 0.24 | 5.0E-01 | A             | 280 | 0.77 | 0.26 | 3.0E-01 |
| rs2497515 | HTR2C   | 23  | 113909654 | C   | 394 | 0.84 | 0.20 | 3.7E-01 | C                        | 292 | 0.88 | 0.24 | 6.1E-01 | C             | 281 | 0.76 | 0.26 | 2.8E-01 |
| rs2497529 | HTR2C   | 23  | 113898788 | A   | 394 | 0.82 | 0.20 | 3.2E-01 | A                        | 292 | 0.85 | 0.24 | 5.0E-01 | A             | 281 | 0.76 | 0.26 | 2.8E-01 |
| rs2497551 | HTR2C   | 23  | 113867237 | A   | 394 | 0.81 | 0.20 | 2.8E-01 | A                        | 292 | 0.83 | 0.24 | 4.4E-01 | A             | 281 | 0.78 | 0.25 | 3.3E-01 |
| rs2498982 | INADL   | 1   | 62289271  | G   | 394 | 1.07 | 0.15 | 6.6E-01 | G                        | 292 | 0.96 | 0.18 | 8.3E-01 | G             | 281 | 1.16 | 0.19 | 4.3E-01 |
| rs2501397 | CNR2    | 1   | 24090279  | C   | 393 | 1.19 | 0.19 | 3.6E-01 | C                        | 291 | 1.08 | 0.24 | 7.6E-01 | C             | 280 | 1.27 | 0.22 | 2.8E-01 |
| rs2502967 | CNR2    | 1   | 24092304  | A   | 393 | 1.28 | 0.18 | 1.8E-01 | A                        | 291 | 1.18 | 0.24 | 4.9E-01 | A             | 280 | 1.34 | 0.22 | 1.8E-01 |
| rs2502993 | CNR2    | 1   | 24073849  | A   | 385 | 1.07 | 0.14 | 6.4E-01 | A                        | 284 | 1.31 | 0.17 | 1.3E-01 | A             | 277 | 0.88 | 0.18 | 4.9E-01 |
| rs2508467 | GRIA4   | 11  | 105263314 | A   | 391 | 0.87 | 0.17 | 4.2E-01 | A                        | 290 | 0.90 | 0.20 | 6.1E-01 | A             | 278 | 0.79 | 0.22 | 2.8E-01 |
| rs251007  | CAMK4   | 5   | 110829717 | T   | 393 | 1.34 | 0.16 | 7.3E-02 | T                        | 291 | 1.58 | 0.19 | 1.7E-02 | T             | 280 | 1.10 | 0.21 | 6.6E-01 |
| rs2511034 | GRIA3   | 23  | 122359553 | C   | 394 | 0.70 | 0.30 | 2.3E-01 | C                        | 292 | 0.40 | 0.46 | 4.8E-02 | C             | 281 | 1.01 | 0.35 | 9.7E-01 |
| rs2511241 | P2RY2   | 11  | 72622989  | C   | 392 | 1.03 | 0.25 | 9.0E-01 | C                        | 290 | 1.15 | 0.29 | 6.3E-01 | C             | 280 | 0.94 | 0.33 | 8.4E-01 |
| rs2515641 | CYP2E1  | 10  | 135201352 | T   | 394 | 1.06 | 0.24 | 8.1E-01 | T                        | 292 | 1.26 | 0.28 | 4.1E-01 | T             | 281 | 0.81 | 0.32 | 5.0E-01 |
| rs2515642 | CYP2E1  | 10  | 135202003 | C   | 394 | 1.23 | 0.17 | 2.3E-01 | C                        | 292 | 1.57 | 0.20 | 2.5E-02 | C             | 281 | 0.92 | 0.22 | 7.0E-01 |
| rs2517956 | ERBB2   | 17  | 35097385  | G   | 394 | 0.75 | 0.15 | 5.8E-02 | G                        | 292 | 0.93 | 0.18 | 6.9E-01 | G             | 281 | 0.61 | 0.21 | 1.8E-02 |
| rs2519154 | DBH     | 9   | 135502096 | C   | 391 | 1.06 | 0.15 | 7.2E-01 | C                        | 289 | 1.19 | 0.18 | 3.5E-01 | C             | 278 | 0.94 | 0.20 | 7.5E-01 |
| rs2520482 | IFRD1   | 7   | 111850878 | C   | 393 | 1.07 | 0.19 | 7.3E-01 | C                        | 291 | 1.16 | 0.22 | 5.1E-01 | C             | 280 | 1.01 | 0.24 | 9.8E-01 |
| rs2529587 | IFRD1   | 7   | 111889970 | A   | 394 | 1.16 | 0.19 | 4.5E-01 | A                        | 292 | 0.94 | 0.25 | 7.8E-01 | A             | 281 | 1.51 | 0.24 | 8.1E-02 |
| rs2535609 | ADORA2B | 17  | 15797465  | G   | 394 | 1.22 | 0.18 | 2.6E-01 | G                        | 292 | 1.26 | 0.22 | 2.8E-01 | G             | 281 | 1.15 | 0.22 | 5.2E-01 |
| rs255125  | CRHR2   | 7   | 30709536  | A   | 394 | 1.10 | 0.16 | 5.7E-01 | A                        | 292 | 1.12 | 0.19 | 5.5E-01 | A             | 281 | 1.17 | 0.20 | 4.5E-01 |
| rs2551640 | CREB1   | 2   | 208116138 | G   | 394 | 0.99 | 0.15 | 9.4E-01 | G                        | 292 | 0.89 | 0.18 | 5.3E-01 | G             | 281 | 1.08 | 0.19 | 6.8E-01 |
| rs2551922 | CREB1   | 2   | 208146805 | A   | 394 | 1.00 | 0.38 | 1.0E+00 | A                        | 292 | 0.83 | 0.48 | 7.0E-01 | A             | 281 | 1.09 | 0.46 | 8.6E-01 |
| rs2551928 | CREB1   | 2   | 208174023 | A   | 394 | 0.91 | 0.19 | 6.4E-01 | A                        | 292 | 0.87 | 0.23 | 5.6E-01 | A             | 281 | 0.91 | 0.23 | 6.9E-01 |
| rs256008  | HSPA9   | 5   | 137938570 | G   | 394 | 0.61 | 0.36 | 1.7E-01 | G                        | 292 | 0.54 | 0.47 | 1.9E-01 | G             | 281 | 0.68 | 0.46 | 4.1E-01 |
| rs2562581 | SLC1A3  | 5   | 36640857  | A   | 394 | 0.93 | 0.22 | 7.4E-01 | A                        | 292 | 0.81 | 0.28 | 4.6E-01 | A             | 281 | 1.15 | 0.27 | 6.1E-01 |
| rs25644   | P2RX4   | 12  | 120151029 | G   | 394 | 0.86 | 0.24 | 5.4E-01 | G                        | 292 | 0.42 | 0.37 | 2.0E-02 | G             | 281 | 1.28 | 0.27 | 3.8E-01 |
| rs2565200 | RET     | 10  | 42942939  | T   | 394 | 0.72 | 0.19 | 8.2E-02 | T                        | 292 | 0.70 | 0.23 | 1.2E-01 | T             | 281 | 0.79 | 0.24 | 3.1E-01 |
| rs25702   | FMR1    | 23  | 146830378 | A   | 394 | 0.93 | 0.28 | 7.8E-01 | A                        | 292 | 1.18 | 0.31 | 6.1E-01 | A             | 281 | 0.63 | 0.40 | 2.4E-01 |



| SNP       | GENE    | CHR | BP        | TMD |     |      |      |         | TMD with widespread pain |     |      |      |         | Localized TMD |     |      |      |         |
|-----------|---------|-----|-----------|-----|-----|------|------|---------|--------------------------|-----|------|------|---------|---------------|-----|------|------|---------|
|           |         |     |           | A1  | N   | OR   | SE   | P       | A1                       | N   | OR   | SE   | P       | A1            | N   | OR   | SE   | P       |
| rs25704   | FMR1    | 23  | 146839230 | T   | 393 | 0.99 | 0.17 | 9.7E-01 | T                        | 291 | 1.15 | 0.20 | 4.9E-01 | T             | 280 | 0.80 | 0.22 | 3.1E-01 |
| rs25707   | FMR1    | 23  | 146818012 | A   | 394 | 1.16 | 0.28 | 5.8E-01 | A                        | 292 | 0.89 | 0.34 | 7.5E-01 | A             | 281 | 1.35 | 0.32 | 3.6E-01 |
| rs25714   | FMR1    | 23  | 146825838 | T   | 393 | 0.92 | 0.28 | 7.7E-01 | T                        | 291 | 1.17 | 0.31 | 6.2E-01 | T             | 280 | 0.62 | 0.40 | 2.4E-01 |
| rs25727   | FMR1    | 23  | 146811486 | C   | 394 | 1.14 | 0.19 | 5.0E-01 | C                        | 292 | 1.06 | 0.24 | 8.2E-01 | C             | 281 | 1.24 | 0.23 | 3.6E-01 |
| rs2576573 | PENK    | 8   | 57520529  | A   | 393 | 0.99 | 0.15 | 9.4E-01 | A                        | 291 | 1.16 | 0.18 | 4.0E-01 | A             | 281 | 0.89 | 0.19 | 5.3E-01 |
| rs2581206 | SLC6A11 | 3   | 10928549  | C   | 382 | 0.95 | 0.15 | 7.1E-01 | C                        | 281 | 0.94 | 0.18 | 7.3E-01 | C             | 272 | 0.91 | 0.18 | 6.3E-01 |
| rs2583389 | PPP3CA  | 4   | 102490484 | T   | 384 | 0.86 | 0.17 | 3.7E-01 | T                        | 287 | 0.87 | 0.20 | 4.8E-01 | T             | 271 | 0.81 | 0.21 | 3.2E-01 |
| rs258763  | NR3C1   | 5   | 142632554 | T   | 394 | 0.90 | 0.14 | 4.5E-01 | T                        | 292 | 0.91 | 0.17 | 5.7E-01 | T             | 281 | 0.87 | 0.17 | 4.1E-01 |
| rs2591154 | KCNJ3   | 2   | 155359446 | T   | 394 | 1.00 | 0.20 | 1.0E+00 | T                        | 292 | 0.81 | 0.26 | 4.1E-01 | T             | 281 | 1.16 | 0.24 | 5.4E-01 |
| rs25923   | CAMK4   | 5   | 110824997 | G   | 394 | 0.92 | 0.15 | 6.0E-01 | G                        | 292 | 0.98 | 0.18 | 9.0E-01 | G             | 281 | 0.85 | 0.19 | 3.7E-01 |
| rs2598414 | GALR2   | 17  | 71578694  | T   | 393 | 1.18 | 0.15 | 2.7E-01 | T                        | 291 | 1.28 | 0.18 | 1.6E-01 | T             | 280 | 1.04 | 0.18 | 8.2E-01 |
| rs2600072 | SLC6A11 | 3   | 10832067  | C   | 384 | 0.89 | 0.16 | 4.7E-01 | C                        | 285 | 1.02 | 0.19 | 9.0E-01 | C             | 273 | 0.74 | 0.21 | 1.6E-01 |
| rs2625956 | AIM     | 3   | 130747960 | G   | 393 | 0.94 | 0.19 | 7.5E-01 | G                        | 291 | 0.82 | 0.24 | 4.2E-01 | G             | 280 | 1.10 | 0.23 | 6.8E-01 |
| rs2626018 | AIM     | 3   | 124774156 | A   | 394 | 1.14 | 0.16 | 4.2E-01 | A                        | 292 | 1.10 | 0.20 | 6.2E-01 | A             | 281 | 1.18 | 0.20 | 4.2E-01 |
| rs2629133 | SLC6A11 | 3   | 10910558  | C   | 394 | 0.90 | 0.16 | 5.1E-01 | C                        | 292 | 0.96 | 0.20 | 8.4E-01 | C             | 281 | 0.79 | 0.21 | 2.5E-01 |
| rs2629135 | SLC6A11 | 3   | 10936430  | C   | 394 | 1.17 | 0.25 | 5.3E-01 | C                        | 292 | 1.14 | 0.30 | 6.7E-01 | C             | 281 | 1.15 | 0.31 | 6.5E-01 |
| rs2630349 | DRD3    | 3   | 115356062 | A   | 394 | 1.00 | 0.29 | 1.0E+00 | A                        | 292 | 1.01 | 0.36 | 9.7E-01 | A             | 281 | 1.16 | 0.36 | 6.9E-01 |
| rs2638360 | AGTR1   | 3   | 149911046 | G   | 394 | 0.80 | 0.19 | 2.5E-01 | G                        | 292 | 0.82 | 0.24 | 4.1E-01 | G             | 281 | 0.85 | 0.24 | 5.1E-01 |
| rs2642183 | PRKACB  | 1   | 84376075  | A   | 394 | 1.20 | 0.17 | 2.8E-01 | A                        | 292 | 1.55 | 0.20 | 2.7E-02 | A             | 281 | 0.82 | 0.22 | 3.5E-01 |
| rs2644596 | NTRK1   | 1   | 155118938 | G   | 394 | 1.20 | 0.17 | 2.8E-01 | G                        | 292 | 1.23 | 0.21 | 3.2E-01 | G             | 281 | 1.28 | 0.21 | 2.3E-01 |
| rs2645715 | PNOC    | 8   | 28250407  | A   | 394 | 1.29 | 0.15 | 8.8E-02 | A                        | 292 | 1.24 | 0.18 | 2.3E-01 | A             | 281 | 1.35 | 0.19 | 1.2E-01 |
| rs2645721 | PNOC    | 8   | 28242526  | C   | 394 | 0.83 | 0.14 | 1.8E-01 | C                        | 292 | 0.77 | 0.17 | 1.3E-01 | C             | 281 | 0.86 | 0.18 | 3.8E-01 |
| rs2652461 | KCNJ3   | 2   | 155396228 | G   | 394 | 1.10 | 0.17 | 6.0E-01 | G                        | 292 | 1.08 | 0.22 | 7.4E-01 | G             | 281 | 1.23 | 0.22 | 3.5E-01 |
| rs2655280 | SLC6A11 | 3   | 10920302  | C   | 394 | 1.45 | 0.16 | 1.8E-02 | C                        | 292 | 1.27 | 0.19 | 2.2E-01 | C             | 281 | 1.67 | 0.19 | 5.8E-03 |
| rs2659058 | KLK1    | 19  | 56017918  | C   | 379 | 0.89 | 0.15 | 4.3E-01 | C                        | 280 | 0.80 | 0.19 | 2.4E-01 | C             | 267 | 0.95 | 0.19 | 8.0E-01 |
| rs2659528 | PPP3CA  | 4   | 102376308 | A   | 394 | 0.84 | 0.18 | 3.2E-01 | A                        | 292 | 1.02 | 0.21 | 9.3E-01 | A             | 281 | 0.60 | 0.25 | 3.8E-02 |
| rs267071  | AIM     | 5   | 116976402 | A   | 394 | 0.96 | 0.15 | 7.7E-01 | A                        | 292 | 1.11 | 0.18 | 5.6E-01 | A             | 281 | 0.80 | 0.19 | 2.5E-01 |
| rs2675494 | EPHB2   | 1   | 23099753  | G   | 385 | 1.15 | 0.15 | 3.4E-01 | G                        | 286 | 1.01 | 0.18 | 9.6E-01 | G             | 274 | 1.41 | 0.19 | 7.5E-02 |
| rs2675511 | AGTR1   | 3   | 149928308 | G   | 392 | 0.95 | 0.16 | 7.4E-01 | G                        | 290 | 0.79 | 0.21 | 2.5E-01 | G             | 280 | 1.24 | 0.20 | 2.9E-01 |
| rs2681491 | ATP2B1  | 12  | 88544822  | C   | 394 | 0.74 | 0.45 | 5.0E-01 | C                        | 292 | 1.06 | 0.49 | 9.1E-01 | C             | 281 | 0.32 | 0.77 | 1.4E-01 |
| rs2681696 | GRK7    | 3   | 142983284 | T   | 393 | 1.07 | 0.15 | 6.7E-01 | T                        | 292 | 1.02 | 0.19 | 9.3E-01 | T             | 280 | 1.02 | 0.20 | 9.3E-01 |
| rs2682826 | NOS1    | 12  | 116137221 | A   | 393 | 0.83 | 0.16 | 2.4E-01 | A                        | 291 | 0.98 | 0.19 | 9.0E-01 | A             | 281 | 0.66 | 0.21 | 5.4E-02 |
| rs26880   | AIM     | 5   | 4958892   | T   | 393 | 0.87 | 0.14 | 3.2E-01 | T                        | 291 | 0.87 | 0.17 | 4.3E-01 | T             | 280 | 0.83 | 0.18 | 3.0E-01 |
| rs2695219 | PPP3CA  | 4   | 102302915 | C   | 394 | 1.06 | 0.14 | 6.7E-01 | C                        | 292 | 1.15 | 0.17 | 4.3E-01 | C             | 281 | 0.97 | 0.18 | 8.4E-01 |
| rs2697159 | SLC6A11 | 3   | 10949427  | G   | 390 | 1.03 | 0.15 | 8.3E-01 | G                        | 290 | 1.06 | 0.18 | 7.4E-01 | G             | 277 | 0.99 | 0.18 | 9.4E-01 |
| rs27072   | SLC6A3  | 5   | 1447522   | T   | 394 | 1.31 | 0.19 | 1.4E-01 | T                        | 292 | 1.63 | 0.22 | 2.5E-02 | T             | 281 | 1.05 | 0.24 | 8.3E-01 |
| rs2709359 | CREB1   | 2   | 208123382 | A   | 394 | 0.91 | 0.43 | 8.3E-01 | A                        | 292 | 0.59 | 0.59 | 3.7E-01 | A             | 281 | 1.19 | 0.49 | 7.2E-01 |
| rs2717162 | GALR1   | 18  | 73097315  | C   | 394 | 1.13 | 0.17 | 4.6E-01 | C                        | 292 | 1.05 | 0.20 | 8.2E-01 | C             | 281 | 1.22 | 0.20 | 3.4E-01 |
| rs2722897 | PNOC    | 8   | 28229116  | A   | 394 | 0.97 | 0.23 | 9.1E-01 | A                        | 292 | 0.99 | 0.29 | 9.7E-01 | A             | 281 | 0.96 | 0.30 | 8.8E-01 |

| SNP       | GENE   | CHR | BP        | TMD |     |      |      |         | TMD with widespread pain |     |      |      |         | Localized TMD |     |      |      |         |
|-----------|--------|-----|-----------|-----|-----|------|------|---------|--------------------------|-----|------|------|---------|---------------|-----|------|------|---------|
|           |        |     |           | A1  | N   | OR   | SE   | P       | A1                       | N   | OR   | SE   | P       | A1            | N   | OR   | SE   | P       |
| rs2725301 | CCKAR  | 4   | 26093727  | A   | 394 | 0.87 | 0.17 | 4.0E-01 | A                        | 292 | 0.89 | 0.21 | 5.6E-01 | A             | 281 | 0.95 | 0.21 | 8.2E-01 |
| rs2730891 | AIM    | 12  | 37270952  | T   | 393 | 1.06 | 0.32 | 8.6E-01 | T                        | 292 | 1.34 | 0.36 | 4.2E-01 | T             | 280 | 0.76 | 0.44 | 5.2E-01 |
| rs2732504 | PPP3CA | 4   | 102228850 | C   | 392 | 0.87 | 0.15 | 3.6E-01 | C                        | 290 | 0.98 | 0.17 | 9.1E-01 | C             | 279 | 0.78 | 0.18 | 1.7E-01 |
| rs2732514 | PPP3CA | 4   | 102277865 | T   | 394 | 1.09 | 0.19 | 6.4E-01 | T                        | 292 | 1.13 | 0.22 | 5.8E-01 | T             | 281 | 1.03 | 0.24 | 8.9E-01 |
| rs2737703 | KCNJ9  | 1   | 158322556 | T   | 381 | 0.94 | 0.16 | 6.8E-01 | T                        | 282 | 1.04 | 0.19 | 8.4E-01 | T             | 272 | 0.75 | 0.20 | 1.6E-01 |
| rs2740762 | EGFR   | 7   | 55228836  | A   | 394 | 1.13 | 0.19 | 5.1E-01 | A                        | 292 | 1.05 | 0.23 | 8.2E-01 | A             | 281 | 1.17 | 0.23 | 4.9E-01 |
| rs2744907 | PTGER3 | 1   | 71292381  | C   | 394 | 1.05 | 0.21 | 8.3E-01 | C                        | 292 | 1.17 | 0.25 | 5.4E-01 | C             | 281 | 0.89 | 0.28 | 6.8E-01 |
| rs2746071 | RGS2   | 1   | 191044187 | G   | 389 | 1.27 | 0.17 | 1.5E-01 | G                        | 289 | 1.45 | 0.20 | 5.8E-02 | G             | 277 | 1.08 | 0.22 | 7.2E-01 |
| rs2746073 | RGS2   | 1   | 191045850 | A   | 394 | 1.34 | 0.17 | 8.2E-02 | A                        | 292 | 1.49 | 0.20 | 4.5E-02 | A             | 281 | 1.16 | 0.22 | 5.1E-01 |
| rs2753268 | KCNJ9  | 1   | 158324876 | A   | 386 | 1.01 | 0.16 | 9.4E-01 | A                        | 288 | 1.13 | 0.19 | 5.3E-01 | A             | 273 | 0.77 | 0.21 | 2.1E-01 |
| rs2758152 | SGK1   | 6   | 134530606 | T   | 391 | 0.91 | 0.21 | 6.5E-01 | T                        | 289 | 1.11 | 0.25 | 6.6E-01 | T             | 279 | 0.61 | 0.30 | 9.4E-02 |
| rs2758331 | SOD2   | 6   | 160025060 | A   | 394 | 1.09 | 0.14 | 5.3E-01 | A                        | 292 | 1.00 | 0.17 | 9.9E-01 | A             | 281 | 1.23 | 0.17 | 2.3E-01 |
| rs2759281 | AIM    | 1   | 203132988 | C   | 391 | 1.19 | 0.23 | 4.5E-01 | C                        | 290 | 1.26 | 0.28 | 4.1E-01 | C             | 278 | 1.18 | 0.28 | 5.4E-01 |
| rs2770150 | TLR4   | 9   | 119502960 | G   | 394 | 1.13 | 0.16 | 4.4E-01 | G                        | 292 | 1.15 | 0.19 | 4.6E-01 | G             | 281 | 1.06 | 0.20 | 7.9E-01 |
| rs2770296 | HTR2A  | 13  | 46338561  | C   | 394 | 1.36 | 0.16 | 6.3E-02 | C                        | 292 | 1.23 | 0.20 | 2.9E-01 | C             | 281 | 1.44 | 0.20 | 6.9E-02 |
| rs2770378 | OXT    | 20  | 3001514   | A   | 392 | 1.01 | 0.15 | 9.4E-01 | A                        | 291 | 0.94 | 0.18 | 7.3E-01 | A             | 279 | 1.10 | 0.19 | 6.1E-01 |
| rs2770997 | GNB2L1 | 5   | 180597671 | C   | 393 | 1.36 | 0.40 | 4.4E-01 | C                        | 291 | 1.38 | 0.46 | 4.8E-01 | C             | 280 | 1.19 | 0.49 | 7.3E-01 |
| rs2779248 | NOS2A  | 17  | 23151959  | C   | 393 | 0.82 | 0.15 | 1.6E-01 | C                        | 291 | 0.79 | 0.18 | 1.9E-01 | C             | 281 | 0.86 | 0.19 | 4.1E-01 |
| rs2779251 | NOS2A  | 17  | 23155453  | A   | 394 | 0.76 | 0.19 | 1.4E-01 | A                        | 292 | 0.85 | 0.22 | 4.6E-01 | A             | 281 | 0.68 | 0.25 | 1.2E-01 |
| rs2779536 | GABBR2 | 9   | 100411090 | T   | 394 | 1.10 | 0.30 | 7.6E-01 | T                        | 292 | 1.40 | 0.35 | 3.3E-01 | T             | 281 | 0.77 | 0.42 | 5.3E-01 |
| rs2790093 | RUNX2  | 6   | 45545462  | G   | 393 | 0.94 | 0.14 | 6.8E-01 | G                        | 291 | 0.98 | 0.18 | 9.1E-01 | G             | 280 | 0.91 | 0.18 | 6.1E-01 |
| rs2795108 | ANXA1  | 9   | 74955298  | C   | 394 | 1.65 | 0.22 | 2.5E-02 | C                        | 292 | 1.57 | 0.26 | 8.2E-02 | C             | 281 | 1.88 | 0.28 | 2.2E-02 |
| rs2795114 | ANXA1  | 9   | 74961134  | C   | 394 | 1.69 | 0.19 | 6.0E-03 | C                        | 292 | 1.57 | 0.22 | 4.4E-02 | C             | 281 | 2.00 | 0.24 | 3.2E-03 |
| rs2797849 | DBH    | 9   | 135491762 | C   | 394 | 1.06 | 0.15 | 7.0E-01 | C                        | 292 | 1.12 | 0.19 | 5.5E-01 | C             | 281 | 1.07 | 0.20 | 7.2E-01 |
| rs2798298 | GRK4   | 4   | 3006400   | G   | 393 | 1.15 | 0.15 | 3.4E-01 | G                        | 291 | 1.08 | 0.18 | 6.5E-01 | G             | 280 | 1.13 | 0.18 | 5.1E-01 |
| rs279843  | GABRA2 | 4   | 46019961  | T   | 393 | 1.02 | 0.14 | 8.8E-01 | T                        | 291 | 1.09 | 0.18 | 6.2E-01 | T             | 280 | 0.98 | 0.18 | 9.0E-01 |
| rs279844  | GABRA2 | 4   | 46024412  | T   | 394 | 0.99 | 0.14 | 9.4E-01 | T                        | 292 | 1.00 | 0.18 | 9.9E-01 | T             | 281 | 1.00 | 0.18 | 9.9E-01 |
| rs2799629 | INADL  | 1   | 62086074  | G   | 394 | 1.04 | 0.19 | 8.5E-01 | G                        | 292 | 0.92 | 0.23 | 7.2E-01 | G             | 281 | 1.22 | 0.22 | 3.8E-01 |
| rs2808536 | GABBR2 | 9   | 100380122 | A   | 393 | 1.13 | 0.15 | 4.2E-01 | A                        | 291 | 0.97 | 0.19 | 8.9E-01 | A             | 281 | 1.23 | 0.19 | 2.8E-01 |
| rs2808707 | NTRK2  | 9   | 86748114  | T   | 394 | 0.80 | 0.15 | 1.2E-01 | T                        | 292 | 0.75 | 0.19 | 1.1E-01 | T             | 281 | 0.81 | 0.18 | 2.4E-01 |
| rs281508  | PRKCE  | 2   | 46264711  | A   | 394 | 0.89 | 0.16 | 4.7E-01 | A                        | 292 | 0.71 | 0.20 | 8.9E-02 | A             | 281 | 1.10 | 0.20 | 6.4E-01 |
| rs2815805 | MAPK14 | 6   | 36176019  | C   | 394 | 0.56 | 0.64 | 3.7E-01 | C                        | 292 | 0.77 | 0.70 | 7.1E-01 | C             | 281 | 0.28 | 1.08 | 2.4E-01 |
| rs2816825 | PRKG1  | 10  | 52423922  | G   | 394 | 0.58 | 0.21 | 1.1E-02 | G                        | 292 | 0.60 | 0.26 | 4.7E-02 | G             | 281 | 0.54 | 0.28 | 2.8E-02 |
| rs2817900 | EPHB2  | 1   | 22984542  | T   | 394 | 1.03 | 0.16 | 8.7E-01 | T                        | 292 | 1.10 | 0.20 | 6.3E-01 | T             | 281 | 1.00 | 0.21 | 1.0E+00 |
| rs2817907 | EPHB2  | 1   | 22979061  | A   | 394 | 0.81 | 0.23 | 3.6E-01 | A                        | 292 | 0.84 | 0.28 | 5.4E-01 | A             | 281 | 0.83 | 0.30 | 5.3E-01 |
| rs2829966 | APP    | 21  | 26176065  | C   | 393 | 0.97 | 0.15 | 8.3E-01 | C                        | 291 | 1.01 | 0.18 | 9.5E-01 | C             | 280 | 0.99 | 0.19 | 9.5E-01 |
| rs2830012 | APP    | 21  | 26319478  | A   | 394 | 0.97 | 0.16 | 8.7E-01 | A                        | 292 | 0.82 | 0.20 | 3.2E-01 | A             | 281 | 1.19 | 0.20 | 3.8E-01 |
| rs2830041 | APP    | 21  | 26369533  | C   | 393 | 0.94 | 0.16 | 7.2E-01 | C                        | 291 | 0.88 | 0.20 | 5.3E-01 | C             | 281 | 0.95 | 0.20 | 8.0E-01 |
| rs2830071 | APP    | 21  | 26422204  | T   | 393 | 0.86 | 0.22 | 4.9E-01 | T                        | 291 | 0.87 | 0.27 | 6.1E-01 | T             | 280 | 0.98 | 0.28 | 9.4E-01 |

| SNP        | GENE   | CHR | BP        | TMD |     |      |      |         | TMD with widespread pain |     |      |      |         | Localized TMD |     |      |      |         |
|------------|--------|-----|-----------|-----|-----|------|------|---------|--------------------------|-----|------|------|---------|---------------|-----|------|------|---------|
|            |        |     |           | A1  | N   | OR   | SE   | P       | A1                       | N   | OR   | SE   | P       | A1            | N   | OR   | SE   | P       |
| rs2830097  | APP    | 21  | 26448234  | C   | 392 | 0.84 | 0.15 | 2.5E-01 | C                        | 290 | 0.94 | 0.18 | 7.3E-01 | C             | 280 | 0.70 | 0.20 | 7.0E-02 |
| rs2832405  | GRIK1  | 21  | 29885616  | C   | 393 | 0.85 | 0.20 | 4.1E-01 | C                        | 291 | 0.75 | 0.25 | 2.3E-01 | C             | 280 | 0.88 | 0.24 | 6.0E-01 |
| rs2832414  | GRIK1  | 21  | 29915992  | G   | 394 | 1.10 | 0.22 | 6.6E-01 | G                        | 292 | 0.89 | 0.28 | 6.8E-01 | G             | 281 | 1.36 | 0.27 | 2.5E-01 |
| rs2832469  | GRIK1  | 21  | 30173976  | G   | 394 | 0.85 | 0.57 | 7.8E-01 | G                        | 292 | 0.77 | 0.70 | 7.1E-01 | G             | 281 | 0.86 | 0.70 | 8.3E-01 |
| rs2835195  | RUNX1  | 21  | 36269129  | T   | 392 | 1.10 | 0.15 | 5.0E-01 | T                        | 291 | 1.28 | 0.18 | 1.6E-01 | T             | 279 | 0.89 | 0.19 | 5.7E-01 |
| rs2835848  | KCNJ6  | 21  | 37932943  | T   | 394 | 1.01 | 0.15 | 9.4E-01 | T                        | 292 | 0.93 | 0.18 | 7.1E-01 | T             | 281 | 1.18 | 0.19 | 3.7E-01 |
| rs2835855  | KCNJ6  | 21  | 37937624  | A   | 394 | 1.01 | 0.15 | 9.4E-01 | A                        | 292 | 0.93 | 0.18 | 7.1E-01 | A             | 281 | 1.18 | 0.19 | 3.7E-01 |
| rs2835885  | KCNJ6  | 21  | 37961436  | G   | 394 | 0.82 | 0.15 | 1.8E-01 | G                        | 292 | 0.77 | 0.19 | 1.6E-01 | G             | 281 | 0.86 | 0.19 | 4.3E-01 |
| rs2835896  | KCNJ6  | 21  | 37988510  | T   | 394 | 0.98 | 0.15 | 8.8E-01 | T                        | 292 | 0.94 | 0.18 | 7.5E-01 | T             | 281 | 1.03 | 0.20 | 8.7E-01 |
| rs2835903  | KCNJ6  | 21  | 37999107  | C   | 392 | 0.81 | 0.15 | 1.6E-01 | C                        | 290 | 0.73 | 0.18 | 8.9E-02 | C             | 280 | 0.92 | 0.19 | 6.5E-01 |
| rs2835912  | KCNJ6  | 21  | 38015912  | T   | 394 | 0.75 | 0.38 | 4.5E-01 | T                        | 292 | 1.16 | 0.43 | 7.3E-01 | T             | 281 | 0.41 | 0.65 | 1.7E-01 |
| rs2835921  | KCNJ6  | 21  | 38037025  | C   | 394 | 1.15 | 0.53 | 7.9E-01 | C                        | 292 | 1.31 | 0.60 | 6.6E-01 | C             | 281 | 0.86 | 0.70 | 8.3E-01 |
| rs2835931  | KCNJ6  | 21  | 38043518  | T   | 394 | 1.18 | 0.16 | 3.0E-01 | T                        | 292 | 1.17 | 0.19 | 4.1E-01 | T             | 281 | 1.22 | 0.21 | 3.3E-01 |
| rs2835945  | KCNJ6  | 21  | 38057170  | A   | 394 | 1.14 | 0.14 | 3.6E-01 | A                        | 292 | 1.21 | 0.18 | 2.9E-01 | A             | 281 | 1.04 | 0.18 | 8.2E-01 |
| rs2835988  | KCNJ6  | 21  | 38113768  | A   | 394 | 1.06 | 0.15 | 7.1E-01 | A                        | 292 | 1.18 | 0.18 | 3.7E-01 | A             | 281 | 0.96 | 0.19 | 8.1E-01 |
| rs2836016  | KCNJ6  | 21  | 38134890  | G   | 394 | 1.00 | 0.15 | 1.0E+00 | G                        | 292 | 1.13 | 0.18 | 4.8E-01 | G             | 281 | 0.89 | 0.20 | 5.8E-01 |
| rs28360463 | P2RX4  | 12  | 120131707 | A   | 387 | 0.89 | 0.23 | 6.0E-01 | A                        | 287 | 0.60 | 0.31 | 9.9E-02 | A             | 274 | 1.11 | 0.27 | 7.0E-01 |
| rs28360521 | CYP2D6 | 22  | 40858920  | T   | 394 | 0.76 | 0.17 | 1.0E-01 | T                        | 292 | 0.57 | 0.22 | 8.2E-03 | T             | 281 | 0.95 | 0.20 | 8.0E-01 |
| rs2839361  | S100B  | 21  | 46848617  | C   | 394 | 1.26 | 0.20 | 2.6E-01 | C                        | 292 | 1.40 | 0.24 | 1.6E-01 | C             | 281 | 1.09 | 0.27 | 7.5E-01 |
| rs2839364  | S100B  | 21  | 46850222  | T   | 391 | 0.81 | 0.20 | 2.7E-01 | T                        | 289 | 0.66 | 0.25 | 1.1E-01 | T             | 279 | 1.00 | 0.24 | 1.0E+00 |
| rs2839668  | GAD2   | 10  | 26543120  | G   | 393 | 1.11 | 0.27 | 7.0E-01 | G                        | 291 | 1.33 | 0.31 | 3.6E-01 | G             | 280 | 0.85 | 0.36 | 6.5E-01 |
| rs2842063  | AIM    | 6   | 71295098  | T   | 394 | 1.04 | 0.18 | 8.5E-01 | T                        | 292 | 0.95 | 0.23 | 8.4E-01 | T             | 281 | 1.13 | 0.23 | 6.0E-01 |
| rs2846675  | KCNJ5  | 11  | 128292246 | C   | 394 | 0.85 | 0.18 | 3.7E-01 | C                        | 292 | 0.84 | 0.22 | 4.3E-01 | C             | 281 | 0.78 | 0.23 | 2.9E-01 |
| rs2846700  | KCNJ5  | 11  | 128274148 | C   | 390 | 0.76 | 0.19 | 1.6E-01 | C                        | 288 | 0.73 | 0.23 | 1.8E-01 | C             | 279 | 0.78 | 0.24 | 3.1E-01 |
| rs2850338  | PPP3CA | 4   | 102407895 | C   | 394 | 0.95 | 0.16 | 7.5E-01 | C                        | 292 | 1.16 | 0.19 | 4.4E-01 | C             | 281 | 0.73 | 0.21 | 1.4E-01 |
| rs2850979  | PPP3CA | 4   | 102313787 | C   | 394 | 1.08 | 0.17 | 6.7E-01 | C                        | 292 | 1.01 | 0.21 | 9.5E-01 | C             | 281 | 1.05 | 0.21 | 8.4E-01 |
| rs2850992  | PPP3CA | 4   | 102341778 | C   | 394 | 0.94 | 0.15 | 7.0E-01 | C                        | 292 | 0.95 | 0.19 | 8.0E-01 | C             | 281 | 0.89 | 0.19 | 5.4E-01 |
| rs2853707  | CX3CR1 | 3   | 39299287  | G   | 394 | 1.05 | 0.17 | 8.0E-01 | G                        | 292 | 0.96 | 0.21 | 8.3E-01 | G             | 281 | 1.08 | 0.22 | 7.2E-01 |
| rs2854248  | ATP1A2 | 1   | 158360551 | A   | 383 | 0.81 | 0.13 | 1.1E-01 | A                        | 282 | 0.72 | 0.16 | 4.5E-02 | A             | 271 | 0.93 | 0.16 | 6.6E-01 |
| rs2854371  | ATP2B1 | 12  | 88519597  | A   | 394 | 0.87 | 0.16 | 4.1E-01 | A                        | 292 | 0.85 | 0.20 | 4.2E-01 | A             | 281 | 0.83 | 0.21 | 3.8E-01 |
| rs2856813  | NGF    | 1   | 115639442 | C   | 394 | 0.84 | 0.14 | 2.3E-01 | C                        | 292 | 0.94 | 0.17 | 7.1E-01 | C             | 281 | 0.79 | 0.18 | 1.9E-01 |
| rs2857656  | CCL2   | 17  | 29606120  | C   | 393 | 0.93 | 0.16 | 6.6E-01 | C                        | 292 | 0.82 | 0.20 | 3.2E-01 | C             | 280 | 1.06 | 0.20 | 7.7E-01 |
| rs2857844  | GRK4   | 4   | 2999386   | G   | 394 | 1.09 | 0.14 | 5.6E-01 | G                        | 292 | 1.10 | 0.17 | 6.0E-01 | G             | 281 | 1.01 | 0.19 | 9.7E-01 |
| rs2859141  | MAPK13 | 6   | 36207738  | A   | 394 | 0.97 | 0.15 | 8.3E-01 | A                        | 292 | 0.97 | 0.18 | 8.8E-01 | A             | 281 | 0.95 | 0.19 | 7.7E-01 |
| rs2862925  | CPN1   | 10  | 101807547 | T   | 394 | 0.82 | 0.14 | 1.6E-01 | T                        | 292 | 0.70 | 0.18 | 4.4E-02 | T             | 281 | 0.90 | 0.18 | 5.4E-01 |
| rs2866112  | NALP12 | 19  | 59002773  | G   | 394 | 1.20 | 0.23 | 4.3E-01 | G                        | 292 | 1.24 | 0.27 | 4.3E-01 | G             | 281 | 1.16 | 0.29 | 6.0E-01 |
| rs2869511  | EPHB2  | 1   | 23013287  | C   | 393 | 0.76 | 0.16 | 9.0E-02 | C                        | 292 | 0.80 | 0.19 | 2.6E-01 | C             | 280 | 0.75 | 0.20 | 1.7E-01 |
| rs2869513  | EPHB2  | 1   | 22918530  | G   | 394 | 0.93 | 0.16 | 6.3E-01 | G                        | 292 | 1.07 | 0.19 | 7.2E-01 | G             | 281 | 0.77 | 0.21 | 2.2E-01 |
| rs2873027  | GABRB3 | 15  | 24418502  | T   | 394 | 1.10 | 0.15 | 5.0E-01 | T                        | 292 | 1.00 | 0.18 | 9.9E-01 | T             | 281 | 1.19 | 0.18 | 3.4E-01 |

| SNP       | GENE    | CHR | BP        | TMD |     |      |      |         | TMD with widespread pain |     |      |      |         | Localized TMD |     |      |      |         |
|-----------|---------|-----|-----------|-----|-----|------|------|---------|--------------------------|-----|------|------|---------|---------------|-----|------|------|---------|
|           |         |     |           | A1  | N   | OR   | SE   | P       | A1                       | N   | OR   | SE   | P       | A1            | N   | OR   | SE   | P       |
| rs2878172 | GCH1    | 14  | 54443420  | G   | 394 | 0.90 | 0.14 | 4.4E-01 | G                        | 292 | 0.87 | 0.17 | 4.2E-01 | G             | 281 | 0.92 | 0.18 | 6.4E-01 |
| rs2880415 | NPY2R   | 4   | 156355477 | C   | 393 | 1.23 | 0.15 | 1.7E-01 | C                        | 291 | 1.18 | 0.17 | 3.5E-01 | C             | 280 | 1.21 | 0.18 | 2.8E-01 |
| rs2880691 | GLRB    | 4   | 158213057 | G   | 386 | 1.08 | 0.21 | 7.1E-01 | G                        | 285 | 1.39 | 0.24 | 1.8E-01 | G             | 275 | 0.85 | 0.28 | 5.7E-01 |
| rs2885816 | KCNK2   | 1   | 213330584 | G   | 394 | 0.91 | 0.14 | 5.2E-01 | G                        | 292 | 1.09 | 0.18 | 6.3E-01 | G             | 281 | 0.80 | 0.18 | 2.2E-01 |
| rs28903   | ACCN1   | 17  | 28361093  | C   | 394 | 0.89 | 0.19 | 5.6E-01 | C                        | 292 | 1.03 | 0.23 | 8.9E-01 | C             | 281 | 0.75 | 0.25 | 2.5E-01 |
| rs28932   | ACCN1   | 17  | 28364860  | C   | 394 | 0.59 | 0.40 | 1.8E-01 | C                        | 292 | 0.73 | 0.47 | 4.9E-01 | C             | 281 | 0.45 | 0.57 | 1.6E-01 |
| rs289816  | AIM     | 15  | 61582014  | G   | 394 | 0.67 | 0.20 | 4.8E-02 | G                        | 292 | 0.69 | 0.25 | 1.3E-01 | G             | 281 | 0.71 | 0.26 | 1.8E-01 |
| rs2898230 | GRIA4   | 11  | 105308454 | T   | 394 | 0.73 | 0.27 | 2.3E-01 | T                        | 292 | 0.70 | 0.33 | 2.8E-01 | T             | 281 | 0.71 | 0.35 | 3.3E-01 |
| rs2909443 | DPP4    | 2   | 162554685 | G   | 393 | 1.03 | 0.14 | 8.2E-01 | G                        | 291 | 1.16 | 0.17 | 4.0E-01 | G             | 280 | 0.93 | 0.18 | 7.1E-01 |
| rs2910266 | GRIA1   | 5   | 152995055 | A   | 394 | 0.83 | 0.16 | 2.5E-01 | A                        | 292 | 0.84 | 0.20 | 3.9E-01 | A             | 281 | 0.86 | 0.21 | 4.6E-01 |
| rs2910269 | GRIA1   | 5   | 153018506 | A   | 394 | 0.96 | 0.15 | 7.7E-01 | A                        | 292 | 0.99 | 0.17 | 9.6E-01 | A             | 281 | 0.92 | 0.19 | 6.5E-01 |
| rs2915890 | GLRA1   | 5   | 151184851 | T   | 394 | 0.91 | 0.14 | 4.8E-01 | T                        | 292 | 0.85 | 0.16 | 3.1E-01 | T             | 281 | 0.93 | 0.18 | 7.0E-01 |
| rs29225   | GABBR1  | 6   | 29689020  | G   | 394 | 0.94 | 0.25 | 8.0E-01 | G                        | 292 | 0.96 | 0.31 | 8.9E-01 | G             | 281 | 1.01 | 0.31 | 9.7E-01 |
| rs29230   | GABBR1  | 6   | 29684372  | G   | 394 | 1.02 | 0.19 | 9.2E-01 | G                        | 292 | 0.87 | 0.24 | 5.8E-01 | G             | 281 | 1.19 | 0.23 | 4.5E-01 |
| rs29243   | GABBR1  | 6   | 29707081  | A   | 378 | 1.19 | 0.61 | 7.7E-01 | A                        | 280 | 1.99 | 0.70 | 3.2E-01 | A             | 268 | 0.67 | 1.16 | 7.3E-01 |
| rs29253   | GABBR1  | 6   | 29688415  | G   | 394 | 0.94 | 0.25 | 8.0E-01 | G                        | 292 | 0.96 | 0.31 | 8.9E-01 | G             | 281 | 1.01 | 0.31 | 9.7E-01 |
| rs2927385 | AIM     | 8   | 20744320  | C   | 394 | 1.07 | 0.14 | 6.2E-01 | C                        | 292 | 1.07 | 0.17 | 7.0E-01 | C             | 281 | 1.10 | 0.18 | 5.8E-01 |
| rs2930125 | AIM     | 10  | 127879147 | C   | 394 | 0.88 | 0.18 | 4.7E-01 | C                        | 292 | 0.88 | 0.22 | 5.6E-01 | C             | 281 | 0.77 | 0.24 | 2.8E-01 |
| rs2934193 | AIM     | 15  | 46047011  | T   | 394 | 0.81 | 0.18 | 2.2E-01 | T                        | 292 | 0.80 | 0.22 | 3.1E-01 | T             | 281 | 0.87 | 0.22 | 5.2E-01 |
| rs2937067 | AIM     | 5   | 116167937 | A   | 394 | 1.04 | 0.15 | 7.7E-01 | A                        | 292 | 0.97 | 0.18 | 8.5E-01 | A             | 281 | 1.16 | 0.19 | 4.3E-01 |
| rs2940251 | RGS4    | 1   | 161314142 | C   | 393 | 1.17 | 0.15 | 3.0E-01 | C                        | 292 | 1.32 | 0.19 | 1.4E-01 | C             | 280 | 1.03 | 0.19 | 8.7E-01 |
| rs294218  | EPHB2   | 1   | 22905844  | C   | 394 | 0.93 | 0.15 | 6.0E-01 | C                        | 292 | 1.13 | 0.18 | 4.8E-01 | C             | 281 | 0.72 | 0.19 | 9.0E-02 |
| rs294231  | EPHB2   | 1   | 22912279  | G   | 394 | 0.90 | 0.16 | 5.2E-01 | G                        | 292 | 1.05 | 0.19 | 8.1E-01 | G             | 281 | 0.75 | 0.21 | 1.7E-01 |
| rs2947027 | CCKBR   | 11  | 6245797   | C   | 378 | 1.25 | 0.18 | 2.2E-01 | C                        | 279 | 1.41 | 0.21 | 1.1E-01 | C             | 271 | 1.15 | 0.23 | 5.6E-01 |
| rs2948905 | AIM     | 15  | 42933056  | G   | 393 | 1.17 | 0.24 | 5.3E-01 | G                        | 291 | 1.15 | 0.30 | 6.5E-01 | G             | 281 | 1.21 | 0.30 | 5.2E-01 |
| rs2952151 | PNMT    | 17  | 35082022  | T   | 391 | 0.75 | 0.16 | 7.3E-02 | T                        | 290 | 0.88 | 0.19 | 5.0E-01 | T             | 278 | 0.65 | 0.21 | 4.1E-02 |
| rs2956    | CALCA   | 11  | 14945697  | A   | 394 | 1.31 | 0.16 | 9.3E-02 | A                        | 292 | 1.23 | 0.19 | 2.9E-01 | A             | 281 | 1.26 | 0.20 | 2.5E-01 |
| rs2960306 | GRK4    | 4   | 2960297   | T   | 393 | 1.10 | 0.15 | 5.6E-01 | T                        | 292 | 1.04 | 0.19 | 8.4E-01 | T             | 280 | 1.11 | 0.19 | 5.9E-01 |
| rs2961956 | KCNJ3   | 2   | 155329048 | T   | 394 | 1.09 | 0.14 | 5.2E-01 | T                        | 292 | 1.09 | 0.17 | 6.1E-01 | T             | 281 | 1.08 | 0.17 | 6.5E-01 |
| rs2962406 | GABRB2  | 5   | 160842679 | T   | 394 | 0.90 | 0.17 | 5.1E-01 | T                        | 292 | 0.74 | 0.21 | 1.5E-01 | T             | 281 | 1.07 | 0.20 | 7.3E-01 |
| rs2963155 | NR3C1   | 5   | 142736197 | G   | 394 | 0.60 | 0.16 | 1.6E-03 | G                        | 292 | 0.52 | 0.21 | 1.9E-03 | G             | 281 | 0.68 | 0.20 | 5.6E-02 |
| rs2964608 | GLRA1   | 5   | 151257082 | A   | 393 | 1.02 | 0.15 | 8.7E-01 | A                        | 291 | 0.97 | 0.18 | 8.7E-01 | A             | 280 | 1.12 | 0.19 | 5.4E-01 |
| rs2973041 | GDNF    | 5   | 37866083  | C   | 389 | 1.12 | 0.19 | 5.5E-01 | C                        | 288 | 1.17 | 0.23 | 4.9E-01 | C             | 277 | 1.05 | 0.24 | 8.5E-01 |
| rs2976532 | NRG1    | 8   | 32713793  | A   | 394 | 1.23 | 0.14 | 1.4E-01 | A                        | 292 | 1.15 | 0.16 | 4.0E-01 | A             | 281 | 1.23 | 0.17 | 2.2E-01 |
| rs2984529 | ZFAND5  | 9   | 74172264  | T   | 394 | 0.89 | 0.14 | 4.1E-01 | T                        | 292 | 0.83 | 0.17 | 2.9E-01 | T             | 281 | 0.96 | 0.17 | 8.2E-01 |
| rs3006476 | S100A12 | 1   | 151615734 | A   | 391 | 0.96 | 0.21 | 8.5E-01 | A                        | 289 | 1.17 | 0.25 | 5.4E-01 | A             | 280 | 0.73 | 0.29 | 2.8E-01 |
| rs3006488 | S100A12 | 1   | 151629131 | G   | 393 | 0.98 | 0.21 | 9.4E-01 | G                        | 291 | 1.16 | 0.25 | 5.6E-01 | G             | 281 | 0.78 | 0.29 | 3.8E-01 |
| rs3020364 | ESR1    | 6   | 152408811 | G   | 390 | 0.83 | 0.15 | 2.2E-01 | G                        | 288 | 0.81 | 0.19 | 2.6E-01 | G             | 279 | 0.77 | 0.19 | 1.8E-01 |
| rs3020368 | ESR1    | 6   | 152412883 | T   | 394 | 0.71 | 0.25 | 1.7E-01 | T                        | 292 | 0.79 | 0.30 | 4.4E-01 | T             | 281 | 0.61 | 0.34 | 1.5E-01 |

| SNP       | GENE   | CHR | BP        | TMD |     |      |      |         | TMD with widespread pain |     |      |      |         | Localized TMD |     |      |      |         |
|-----------|--------|-----|-----------|-----|-----|------|------|---------|--------------------------|-----|------|------|---------|---------------|-----|------|------|---------|
|           |        |     |           | A1  | N   | OR   | SE   | P       | A1                       | N   | OR   | SE   | P       | A1            | N   | OR   | SE   | P       |
| rs3020377 | ESR1   | 6   | 152314091 | G   | 393 | 1.00 | 0.15 | 9.8E-01 | G                        | 291 | 0.87 | 0.19 | 4.8E-01 | G             | 280 | 1.09 | 0.19 | 6.3E-01 |
| rs3020382 | ESR1   | 6   | 152453830 | C   | 393 | 0.80 | 0.19 | 2.5E-01 | C                        | 291 | 0.86 | 0.23 | 4.9E-01 | C             | 280 | 0.74 | 0.25 | 2.2E-01 |
| rs3020407 | ESR1   | 6   | 152348954 | G   | 394 | 0.86 | 0.16 | 3.4E-01 | G                        | 292 | 0.72 | 0.20 | 9.6E-02 | G             | 281 | 1.01 | 0.19 | 9.8E-01 |
| rs3020422 | ESR1   | 6   | 152390451 | A   | 393 | 0.83 | 0.15 | 2.3E-01 | A                        | 291 | 0.83 | 0.19 | 3.1E-01 | A             | 280 | 0.76 | 0.19 | 1.6E-01 |
| rs3020450 | ESR2   | 14  | 63838055  | T   | 394 | 0.91 | 0.15 | 5.4E-01 | T                        | 292 | 1.10 | 0.19 | 6.2E-01 | T             | 281 | 0.78 | 0.19 | 1.9E-01 |
| rs3024496 | IL10   | 1   | 205008487 | G   | 394 | 0.75 | 0.15 | 5.7E-02 | G                        | 292 | 0.77 | 0.18 | 1.6E-01 | G             | 281 | 0.71 | 0.18 | 6.4E-02 |
| rs3024505 | IL10   | 1   | 205006527 | A   | 394 | 0.85 | 0.19 | 4.0E-01 | A                        | 292 | 1.02 | 0.22 | 9.4E-01 | A             | 281 | 0.66 | 0.25 | 9.8E-02 |
| rs3025010 | VEGFA  | 6   | 43855555  | C   | 390 | 0.90 | 0.15 | 5.0E-01 | C                        | 288 | 0.86 | 0.18 | 4.1E-01 | C             | 279 | 1.01 | 0.19 | 9.5E-01 |
| rs3025388 | DBH    | 9   | 135493077 | G   | 394 | 1.15 | 0.20 | 4.9E-01 | G                        | 292 | 0.97 | 0.24 | 9.1E-01 | G             | 281 | 1.26 | 0.24 | 3.4E-01 |
| rs3027322 | GLRA2  | 23  | 14462994  | C   | 394 | 1.01 | 0.15 | 9.4E-01 | C                        | 292 | 0.90 | 0.18 | 5.4E-01 | C             | 281 | 1.28 | 0.19 | 1.9E-01 |
| rs3027358 | GLRA2  | 23  | 14514080  | G   | 393 | 1.12 | 0.15 | 4.5E-01 | G                        | 291 | 0.97 | 0.18 | 8.6E-01 | G             | 280 | 1.36 | 0.19 | 1.0E-01 |
| rs3027379 | GLRA2  | 23  | 14528139  | C   | 394 | 0.69 | 0.50 | 4.6E-01 | C                        | 292 | 0.80 | 0.61 | 7.1E-01 | C             | 281 | 0.66 | 0.68 | 5.5E-01 |
| rs3027405 | MAOA   | 23  | 43481273  | T   | 394 | 1.18 | 0.33 | 6.2E-01 | T                        | 292 | 1.00 | 0.40 | 9.9E-01 | T             | 281 | 1.25 | 0.39 | 5.7E-01 |
| rs3027407 | MAOA   | 23  | 43489785  | A   | 394 | 0.97 | 0.15 | 8.2E-01 | A                        | 292 | 1.00 | 0.18 | 9.8E-01 | A             | 281 | 0.88 | 0.19 | 5.0E-01 |
| rs3027449 | MAOB   | 23  | 43534161  | T   | 394 | 1.29 | 0.20 | 2.0E-01 | T                        | 292 | 1.38 | 0.23 | 1.6E-01 | T             | 281 | 1.10 | 0.24 | 7.1E-01 |
| rs3027452 | MAOB   | 23  | 43542733  | A   | 394 | 1.29 | 0.20 | 2.0E-01 | A                        | 292 | 1.38 | 0.23 | 1.6E-01 | A             | 281 | 1.10 | 0.24 | 7.1E-01 |
| rs303459  | LIPM   | 10  | 90507109  | A   | 394 | 0.94 | 0.17 | 7.3E-01 | A                        | 292 | 1.06 | 0.21 | 7.7E-01 | A             | 281 | 0.90 | 0.22 | 6.5E-01 |
| rs303477  | LIPM   | 10  | 90535813  | A   | 393 | 1.16 | 0.18 | 4.1E-01 | A                        | 291 | 1.13 | 0.22 | 5.8E-01 | A             | 281 | 1.35 | 0.22 | 1.7E-01 |
| rs303524  | LIPM   | 10  | 90564202  | C   | 394 | 0.88 | 0.16 | 4.3E-01 | C                        | 292 | 0.79 | 0.20 | 2.3E-01 | C             | 281 | 0.95 | 0.19 | 8.1E-01 |
| rs303802  | SCN8A  | 12  | 50455664  | C   | 391 | 0.78 | 0.16 | 1.1E-01 | C                        | 289 | 0.77 | 0.19 | 1.8E-01 | C             | 278 | 0.78 | 0.20 | 2.1E-01 |
| rs303815  | SCN8A  | 12  | 50470538  | T   | 394 | 0.78 | 0.16 | 1.2E-01 | T                        | 292 | 0.77 | 0.19 | 1.8E-01 | T             | 281 | 0.77 | 0.20 | 2.0E-01 |
| rs306076  | CAMK4  | 5   | 110684593 | T   | 394 | 1.21 | 0.20 | 3.3E-01 | T                        | 292 | 1.04 | 0.24 | 8.7E-01 | T             | 281 | 1.28 | 0.24 | 3.0E-01 |
| rs306083  | CAMK4  | 5   | 110672588 | A   | 394 | 1.23 | 0.23 | 3.7E-01 | A                        | 292 | 1.02 | 0.28 | 9.4E-01 | A             | 281 | 1.32 | 0.27 | 2.9E-01 |
| rs306090  | CAMK4  | 5   | 110775818 | G   | 394 | 1.08 | 0.15 | 6.4E-01 | G                        | 292 | 1.07 | 0.19 | 7.2E-01 | G             | 281 | 1.03 | 0.19 | 8.9E-01 |
| rs306098  | CAMK4  | 5   | 110767575 | A   | 394 | 1.05 | 0.14 | 7.2E-01 | A                        | 292 | 1.27 | 0.17 | 1.6E-01 | A             | 281 | 0.87 | 0.18 | 4.6E-01 |
| rs306124  | CAMK4  | 5   | 110743025 | T   | 391 | 1.10 | 0.21 | 6.6E-01 | T                        | 289 | 0.98 | 0.26 | 9.5E-01 | T             | 280 | 1.10 | 0.25 | 7.2E-01 |
| rs308379  | FGF2   | 4   | 124002346 | A   | 394 | 0.99 | 0.15 | 9.4E-01 | A                        | 292 | 0.92 | 0.18 | 6.6E-01 | A             | 281 | 1.09 | 0.18 | 6.5E-01 |
| rs308388  | FGF2   | 4   | 124006529 | A   | 392 | 0.81 | 0.15 | 1.6E-01 | A                        | 290 | 0.84 | 0.18 | 3.4E-01 | A             | 280 | 0.79 | 0.19 | 2.3E-01 |
| rs308395  | FGF2   | 4   | 123966392 | G   | 393 | 0.94 | 0.20 | 7.4E-01 | G                        | 291 | 1.04 | 0.23 | 8.6E-01 | G             | 280 | 0.76 | 0.26 | 2.9E-01 |
| rs308442  | FGF2   | 4   | 123994363 | A   | 394 | 0.87 | 0.17 | 4.0E-01 | A                        | 292 | 0.75 | 0.21 | 1.6E-01 | A             | 281 | 0.97 | 0.21 | 9.0E-01 |
| rs3087221 | IL6    | 7   | 22729942  | T   | 393 | 0.83 | 0.61 | 7.6E-01 | T                        | 291 | 1.06 | 0.66 | 9.3E-01 | T             | 280 | 0.49 | 1.00 | 4.7E-01 |
| rs3088139 | STAU2  | 8   | 74625643  | T   | 393 | 0.91 | 0.29 | 7.5E-01 | T                        | 291 | 0.89 | 0.37 | 7.6E-01 | T             | 280 | 0.92 | 0.37 | 8.2E-01 |
| rs3091307 | IL13   | 5   | 132017035 | G   | 393 | 0.90 | 0.16 | 5.0E-01 | G                        | 291 | 0.81 | 0.20 | 2.9E-01 | G             | 280 | 1.02 | 0.20 | 9.2E-01 |
| rs3091406 | DBI    | 2   | 119841854 | A   | 387 | 0.73 | 0.18 | 7.2E-02 | A                        | 287 | 0.59 | 0.23 | 2.6E-02 | A             | 276 | 0.85 | 0.22 | 4.5E-01 |
| rs3093668 | TNF    | 6   | 31654474  | C   | 394 | 1.33 | 0.34 | 4.0E-01 | C                        | 292 | 0.95 | 0.43 | 9.1E-01 | C             | 281 | 1.64 | 0.39 | 2.1E-01 |
| rs3093726 | TNF    | 6   | 31654768  | C   | 394 | 1.33 | 0.34 | 4.0E-01 | C                        | 292 | 0.95 | 0.43 | 9.1E-01 | C             | 281 | 1.64 | 0.39 | 2.1E-01 |
| rs309499  | EPHB2  | 1   | 23107533  | A   | 389 | 1.20 | 0.14 | 2.0E-01 | A                        | 289 | 1.01 | 0.17 | 9.5E-01 | A             | 277 | 1.51 | 0.18 | 2.3E-02 |
| rs3096140 | GDNF   | 5   | 37868590  | G   | 393 | 0.97 | 0.15 | 8.4E-01 | G                        | 291 | 1.23 | 0.18 | 2.5E-01 | G             | 280 | 0.73 | 0.20 | 1.3E-01 |
| rs3097500 | GABRG3 | 15  | 25441923  | T   | 393 | 1.08 | 0.14 | 5.8E-01 | T                        | 291 | 1.13 | 0.17 | 4.5E-01 | T             | 281 | 1.03 | 0.17 | 8.7E-01 |

| SNP       | GENE   | CHR | BP        | TMD |     |      |      |         | TMD with widespread pain |     |      |      |         | Localized TMD |     |      |      |         |
|-----------|--------|-----|-----------|-----|-----|------|------|---------|--------------------------|-----|------|------|---------|---------------|-----|------|------|---------|
|           |        |     |           | A1  | N   | OR   | SE   | P       | A1                       | N   | OR   | SE   | P       | A1            | N   | OR   | SE   | P       |
| rs3100865 | AIM    | 1   | 2795967   | G   | 387 | 0.99 | 0.15 | 9.5E-01 | G                        | 286 | 1.11 | 0.17 | 5.4E-01 | G             | 275 | 0.79 | 0.20 | 2.4E-01 |
| rs3101640 | GABRG3 | 15  | 25443454  | C   | 394 | 1.05 | 0.14 | 7.3E-01 | C                        | 292 | 1.10 | 0.17 | 5.5E-01 | C             | 281 | 1.00 | 0.18 | 1.0E+00 |
| rs3102976 | EZR    | 6   | 159110007 | T   | 385 | 1.34 | 0.17 | 7.9E-02 | T                        | 284 | 1.55 | 0.20 | 3.1E-02 | T             | 275 | 1.11 | 0.20 | 6.1E-01 |
| rs3104703 | GRIN2A | 16  | 9972637   | G   | 394 | 0.91 | 0.14 | 5.2E-01 | G                        | 292 | 0.99 | 0.17 | 9.4E-01 | G             | 281 | 0.84 | 0.18 | 3.2E-01 |
| rs3106653 | KCNJ3  | 2   | 155283806 | G   | 394 | 0.87 | 0.15 | 3.6E-01 | G                        | 292 | 0.84 | 0.19 | 3.6E-01 | G             | 281 | 0.85 | 0.19 | 3.9E-01 |
| rs3106660 | KCNJ3  | 2   | 155261521 | A   | 393 | 1.31 | 0.43 | 5.3E-01 | A                        | 291 | 1.21 | 0.54 | 7.2E-01 | A             | 280 | 1.61 | 0.52 | 3.6E-01 |
| rs3106661 | KCNJ3  | 2   | 155260993 | G   | 393 | 1.39 | 0.34 | 3.3E-01 | G                        | 291 | 1.45 | 0.39 | 3.4E-01 | G             | 280 | 1.21 | 0.42 | 6.6E-01 |
| rs3111017 | KCNJ3  | 2   | 155289884 | A   | 394 | 0.89 | 0.15 | 4.6E-01 | A                        | 292 | 0.84 | 0.18 | 3.4E-01 | A             | 281 | 0.94 | 0.18 | 7.3E-01 |
| rs3111033 | KCNJ3  | 2   | 155264124 | T   | 379 | 0.84 | 0.41 | 6.6E-01 | T                        | 282 | 0.87 | 0.49 | 7.8E-01 | T             | 267 | 0.85 | 0.52 | 7.6E-01 |
| rs3123116 | EZR    | 6   | 159130114 | C   | 393 | 0.81 | 0.22 | 3.4E-01 | C                        | 291 | 0.77 | 0.27 | 3.5E-01 | C             | 281 | 0.83 | 0.28 | 5.0E-01 |
| rs3123655 | RET    | 10  | 42915200  | G   | 394 | 1.08 | 0.15 | 6.1E-01 | G                        | 292 | 0.99 | 0.18 | 9.7E-01 | G             | 281 | 1.19 | 0.19 | 3.6E-01 |
| rs3125296 | ATF3   | 1   | 210844909 | A   | 394 | 1.33 | 0.15 | 6.7E-02 | A                        | 292 | 1.27 | 0.19 | 2.0E-01 | A             | 281 | 1.54 | 0.19 | 2.7E-02 |
| rs31309   | CAMK4  | 5   | 110850399 | C   | 394 | 1.12 | 0.34 | 7.3E-01 | C                        | 292 | 1.53 | 0.41 | 3.0E-01 | C             | 281 | 1.24 | 0.45 | 6.3E-01 |
| rs3134353 | YWHAZ  | 8   | 102016629 | A   | 394 | 0.60 | 0.16 | 1.1E-03 | A                        | 292 | 0.53 | 0.19 | 9.2E-04 | A             | 281 | 0.65 | 0.20 | 3.1E-02 |
| rs3134380 | YWHAZ  | 8   | 102012495 | A   | 393 | 1.44 | 0.14 | 1.1E-02 | A                        | 291 | 1.55 | 0.17 | 1.1E-02 | A             | 281 | 1.43 | 0.18 | 4.9E-02 |
| rs3136540 | GAL    | 11  | 68212986  | T   | 393 | 0.97 | 0.16 | 8.4E-01 | T                        | 291 | 0.86 | 0.21 | 4.6E-01 | T             | 280 | 1.19 | 0.20 | 3.9E-01 |
| rs3136541 | GAL    | 11  | 68214519  | C   | 394 | 0.98 | 0.15 | 8.8E-01 | C                        | 292 | 0.86 | 0.19 | 4.2E-01 | C             | 281 | 1.20 | 0.19 | 3.4E-01 |
| rs3136546 | GAL    | 11  | 68218123  | A   | 391 | 0.79 | 0.23 | 3.1E-01 | A                        | 290 | 0.74 | 0.29 | 2.9E-01 | A             | 279 | 0.76 | 0.29 | 3.4E-01 |
| rs3136672 | CCR1   | 3   | 46217789  | C   | 394 | 0.82 | 0.24 | 4.1E-01 | C                        | 292 | 1.21 | 0.28 | 5.0E-01 | C             | 281 | 0.61 | 0.36 | 1.7E-01 |
| rs314313  | EPHB4  | 7   | 100261301 | C   | 391 | 0.72 | 0.16 | 3.3E-02 | C                        | 289 | 0.64 | 0.20 | 2.5E-02 | C             | 279 | 0.76 | 0.19 | 1.6E-01 |
| rs314346  | EPHB4  | 7   | 100236453 | C   | 381 | 1.36 | 0.15 | 3.7E-02 | C                        | 283 | 1.41 | 0.18 | 5.0E-02 | C             | 271 | 1.29 | 0.18 | 1.5E-01 |
| rs315280  | AIM    | 7   | 142552081 | G   | 392 | 1.01 | 0.16 | 9.3E-01 | G                        | 291 | 1.15 | 0.20 | 4.9E-01 | G             | 279 | 0.88 | 0.22 | 5.5E-01 |
| rs315946  | IL1RN  | 2   | 113610335 | A   | 394 | 0.89 | 0.22 | 5.8E-01 | A                        | 292 | 1.18 | 0.25 | 5.1E-01 | A             | 281 | 0.58 | 0.32 | 8.2E-02 |
| rs315951  | IL1RN  | 2   | 113607057 | G   | 394 | 1.00 | 0.17 | 1.0E+00 | G                        | 292 | 1.06 | 0.20 | 7.6E-01 | G             | 281 | 0.94 | 0.21 | 7.8E-01 |
| rs315952  | IL1RN  | 2   | 113606775 | C   | 394 | 0.99 | 0.17 | 9.3E-01 | C                        | 292 | 1.06 | 0.20 | 7.7E-01 | C             | 281 | 0.92 | 0.21 | 6.8E-01 |
| rs316630  | PRKACB | 1   | 84484359  | T   | 393 | 1.34 | 0.15 | 5.3E-02 | T                        | 291 | 1.73 | 0.18 | 2.4E-03 | T             | 281 | 0.91 | 0.20 | 6.5E-01 |
| rs3176921 | CRH    | 8   | 67253933  | G   | 392 | 0.93 | 0.24 | 7.6E-01 | G                        | 291 | 0.75 | 0.32 | 3.7E-01 | G             | 280 | 1.28 | 0.29 | 3.9E-01 |
| rs3181052 | IL1RN  | 2   | 113602520 | A   | 394 | 1.07 | 0.22 | 7.5E-01 | A                        | 292 | 0.92 | 0.27 | 7.5E-01 | A             | 281 | 1.29 | 0.25 | 3.2E-01 |
| rs3181080 | CCR1   | 3   | 46224933  | T   | 394 | 0.78 | 0.25 | 3.2E-01 | T                        | 292 | 1.13 | 0.30 | 6.7E-01 | T             | 281 | 0.57 | 0.37 | 1.4E-01 |
| rs3182239 | EPHB1  | 3   | 136460926 | G   | 394 | 0.79 | 0.22 | 2.8E-01 | G                        | 292 | 0.68 | 0.28 | 1.7E-01 | G             | 281 | 0.90 | 0.27 | 6.9E-01 |
| rs319773  | ACCN1  | 17  | 28518230  | A   | 392 | 1.26 | 0.16 | 1.4E-01 | A                        | 291 | 1.09 | 0.19 | 6.6E-01 | A             | 280 | 1.56 | 0.19 | 2.0E-02 |
| rs3212346 | MC1R   | 16  | 88509859  | A   | 394 | 0.76 | 0.24 | 2.4E-01 | A                        | 292 | 0.61 | 0.31 | 1.0E-01 | A             | 281 | 0.86 | 0.29 | 6.0E-01 |
| rs3212363 | MC1R   | 16  | 88512942  | T   | 381 | 0.75 | 0.17 | 8.6E-02 | T                        | 283 | 0.72 | 0.21 | 1.2E-01 | T             | 270 | 0.79 | 0.21 | 2.6E-01 |
| rs3213904 | SCN3A  | 2   | 165678858 | A   | 394 | 0.99 | 0.16 | 9.4E-01 | A                        | 292 | 1.12 | 0.19 | 5.7E-01 | A             | 281 | 0.83 | 0.21 | 3.5E-01 |
| rs3219151 | GABRA6 | 5   | 161061492 | C   | 394 | 0.81 | 0.14 | 1.5E-01 | C                        | 292 | 0.80 | 0.17 | 2.0E-01 | C             | 281 | 0.84 | 0.19 | 3.5E-01 |
| rs3219203 | GABRG2 | 5   | 161427430 | T   | 393 | 1.41 | 0.28 | 2.2E-01 | T                        | 291 | 1.29 | 0.33 | 4.4E-01 | T             | 281 | 1.43 | 0.33 | 2.9E-01 |
| rs322964  | TRPV3  | 17  | 3405219   | C   | 386 | 0.95 | 0.15 | 7.3E-01 | C                        | 285 | 0.87 | 0.19 | 4.5E-01 | C             | 275 | 1.10 | 0.19 | 6.1E-01 |
| rs324026  | DRD3   | 3   | 115373732 | C   | 394 | 1.00 | 0.14 | 1.0E+00 | C                        | 292 | 1.13 | 0.17 | 4.8E-01 | C             | 281 | 0.93 | 0.18 | 6.8E-01 |
| rs324029  | DRD3   | 3   | 115364313 | A   | 394 | 0.92 | 0.15 | 5.9E-01 | A                        | 292 | 1.06 | 0.19 | 7.8E-01 | A             | 281 | 0.82 | 0.20 | 3.2E-01 |

| SNP        | GENE     | CHR | BP        | TMD |     |      |      |         | TMD with widespread pain |     |      |      |         | Localized TMD |     |      |      |         |
|------------|----------|-----|-----------|-----|-----|------|------|---------|--------------------------|-----|------|------|---------|---------------|-----|------|------|---------|
|            |          |     |           | A1  | N   | OR   | SE   | P       | A1                       | N   | OR   | SE   | P       | A1            | N   | OR   | SE   | P       |
| rs324148   | SLC29A1  | 6   | 44304556  | T   | 393 | 1.09 | 0.16 | 5.9E-01 | T                        | 291 | 1.06 | 0.20 | 7.8E-01 | T             | 280 | 1.12 | 0.20 | 5.7E-01 |
| rs324419   | FAAH     | 1   | 46644573  | T   | 392 | 1.06 | 0.19 | 7.8E-01 | T                        | 290 | 1.03 | 0.23 | 9.0E-01 | T             | 280 | 1.08 | 0.23 | 7.4E-01 |
| rs324420   | FAAH     | 1   | 46643348  | A   | 389 | 1.25 | 0.19 | 2.3E-01 | A                        | 290 | 1.28 | 0.23 | 2.8E-01 | A             | 277 | 1.18 | 0.23 | 4.7E-01 |
| rs324586   | CHRM2    | 7   | 136301966 | C   | 392 | 1.61 | 0.26 | 6.6E-02 | C                        | 291 | 1.38 | 0.31 | 2.9E-01 | C             | 279 | 1.80 | 0.30 | 4.9E-02 |
| rs324637   | CHRM2    | 7   | 136337369 | T   | 391 | 0.80 | 0.15 | 1.5E-01 | T                        | 289 | 0.76 | 0.18 | 1.3E-01 | T             | 279 | 0.87 | 0.20 | 4.8E-01 |
| rs324651   | CHRM2    | 7   | 136349801 | T   | 393 | 0.65 | 0.21 | 4.4E-02 | T                        | 292 | 0.73 | 0.25 | 2.2E-01 | T             | 280 | 0.55 | 0.29 | 3.8E-02 |
| rs3264     | MPDZ     | 9   | 13096598  | C   | 394 | 0.83 | 0.15 | 1.9E-01 | C                        | 292 | 0.73 | 0.18 | 8.0E-02 | C             | 281 | 0.96 | 0.18 | 8.4E-01 |
| rs326626   | AIM      | 5   | 133639706 | G   | 394 | 1.04 | 0.27 | 8.9E-01 | G                        | 292 | 0.90 | 0.33 | 7.4E-01 | G             | 281 | 1.16 | 0.32 | 6.4E-01 |
| rs32897    | CRHBP    | 5   | 76286728  | C   | 393 | 0.80 | 0.19 | 2.6E-01 | C                        | 291 | 0.78 | 0.24 | 2.9E-01 | C             | 281 | 0.87 | 0.24 | 5.6E-01 |
| rs333113   | AIM      | 17  | 4347105   | C   | 387 | 1.02 | 0.19 | 9.3E-01 | C                        | 287 | 0.88 | 0.24 | 5.9E-01 | C             | 274 | 1.17 | 0.23 | 5.1E-01 |
| rs33383    | NR3C1    | 5   | 142690179 | T   | 394 | 0.93 | 0.14 | 6.3E-01 | T                        | 292 | 0.95 | 0.17 | 7.8E-01 | T             | 281 | 0.90 | 0.18 | 5.5E-01 |
| rs33389    | NR3C1    | 5   | 142680692 | T   | 394 | 0.56 | 0.20 | 3.6E-03 | T                        | 292 | 0.42 | 0.28 | 2.1E-03 | T             | 281 | 0.70 | 0.25 | 1.6E-01 |
| rs3392     | KCNJ6    | 21  | 37952841  | C   | 394 | 0.81 | 0.15 | 1.6E-01 | C                        | 292 | 0.78 | 0.18 | 1.6E-01 | C             | 281 | 0.86 | 0.18 | 4.2E-01 |
| rs34363326 | HSPCA    | 14  | 101677203 | G   | 394 | 0.64 | 0.32 | 1.6E-01 | G                        | 292 | 0.72 | 0.38 | 3.9E-01 | G             | 281 | 0.49 | 0.45 | 1.2E-01 |
| rs34427887 | OPRM1    | 6   | 154609555 | T   | 394 | 0.97 | 0.26 | 9.0E-01 | T                        | 292 | 1.21 | 0.30 | 5.2E-01 | T             | 281 | 0.65 | 0.38 | 2.6E-01 |
| rs34436714 | NALP12   | 19  | 59019125  | A   | 394 | 1.25 | 0.17 | 2.0E-01 | A                        | 292 | 1.12 | 0.21 | 5.9E-01 | A             | 281 | 1.33 | 0.21 | 1.8E-01 |
| rs344816   | AIM      | 19  | 50517466  | T   | 394 | 0.97 | 0.15 | 8.2E-01 | T                        | 292 | 0.79 | 0.19 | 2.0E-01 | T             | 281 | 1.16 | 0.19 | 4.2E-01 |
| rs34668411 | HSPCA    | 14  | 101677392 | C   | 393 | 0.63 | 0.32 | 1.6E-01 | C                        | 291 | 0.72 | 0.38 | 3.8E-01 | C             | 280 | 0.49 | 0.46 | 1.1E-01 |
| rs348277   | STAU1    | 20  | 47218636  | T   | 394 | 1.24 | 0.16 | 1.9E-01 | T                        | 292 | 1.14 | 0.20 | 5.0E-01 | T             | 281 | 1.28 | 0.20 | 2.2E-01 |
| rs348298   | STAU1    | 20  | 47182117  | A   | 392 | 0.56 | 0.32 | 6.9E-02 | A                        | 290 | 0.60 | 0.38 | 1.8E-01 | A             | 280 | 0.46 | 0.43 | 7.5E-02 |
| rs34971363 | NALP12   | 19  | 59005519  | C   | 394 | 0.83 | 0.27 | 5.0E-01 | C                        | 292 | 0.76 | 0.34 | 4.2E-01 | C             | 281 | 0.81 | 0.34 | 5.4E-01 |
| rs35074133 | HSP90AB1 | 6   | 44322847  | A   | 394 | 1.00 | 0.32 | 1.0E+00 | A                        | 292 | 1.29 | 0.38 | 5.1E-01 | A             | 281 | 0.95 | 0.43 | 9.1E-01 |
| rs35767    | IGF1     | 12  | 101399699 | A   | 394 | 1.06 | 0.19 | 7.7E-01 | A                        | 292 | 1.05 | 0.23 | 8.5E-01 | A             | 281 | 1.07 | 0.24 | 7.7E-01 |
| rs36017    | SLC6A2   | 16  | 54276319  | C   | 393 | 0.96 | 0.14 | 7.7E-01 | C                        | 291 | 0.99 | 0.17 | 9.6E-01 | C             | 281 | 0.91 | 0.18 | 6.2E-01 |
| rs36021    | SLC6A2   | 16  | 54269451  | T   | 394 | 1.17 | 0.15 | 2.9E-01 | T                        | 292 | 1.16 | 0.18 | 4.0E-01 | T             | 281 | 1.19 | 0.19 | 3.8E-01 |
| rs36023    | SLC6A2   | 16  | 54264755  | A   | 394 | 1.01 | 0.14 | 9.4E-01 | A                        | 292 | 0.91 | 0.18 | 6.0E-01 | A             | 281 | 1.11 | 0.18 | 5.6E-01 |
| rs36024    | SLC6A2   | 16  | 54263892  | A   | 394 | 1.00 | 0.14 | 1.0E+00 | A                        | 292 | 0.99 | 0.17 | 9.6E-01 | A             | 281 | 1.02 | 0.18 | 9.2E-01 |
| rs36110    | EPHB1    | 3   | 136182877 | C   | 393 | 1.19 | 0.15 | 2.5E-01 | C                        | 291 | 1.22 | 0.18 | 2.7E-01 | C             | 280 | 1.11 | 0.19 | 5.8E-01 |
| rs361525   | TNF      | 6   | 31651080  | A   | 394 | 1.45 | 0.33 | 2.6E-01 | A                        | 292 | 1.31 | 0.40 | 5.0E-01 | A             | 281 | 1.64 | 0.39 | 2.1E-01 |
| rs362895   | GRM1     | 6   | 146721019 | A   | 394 | 0.85 | 0.19 | 3.9E-01 | A                        | 292 | 0.88 | 0.24 | 5.8E-01 | A             | 281 | 0.98 | 0.24 | 9.2E-01 |
| rs362936   | GRM1     | 6   | 146762519 | A   | 393 | 0.80 | 0.68 | 7.4E-01 | A                        | 292 | 0.72 | 0.85 | 6.9E-01 | A             | 280 | 0.81 | 0.85 | 8.1E-01 |
| rs363230   | SLC18A2  | 10  | 119019505 | C   | 393 | 1.25 | 0.14 | 1.2E-01 | C                        | 291 | 1.02 | 0.17 | 9.2E-01 | C             | 281 | 1.60 | 0.18 | 9.8E-03 |
| rs363279   | SLC18A2  | 10  | 119026615 | C   | 394 | 1.04 | 0.27 | 8.9E-01 | C                        | 292 | 0.79 | 0.35 | 5.1E-01 | C             | 281 | 1.30 | 0.32 | 4.2E-01 |
| rs363330   | SLC18A2  | 10  | 118984828 | G   | 394 | 1.29 | 0.25 | 3.2E-01 | G                        | 292 | 1.29 | 0.30 | 4.0E-01 | G             | 281 | 1.38 | 0.32 | 3.1E-01 |
| rs363332   | SLC18A2  | 10  | 118992657 | A   | 393 | 1.07 | 0.16 | 6.6E-01 | A                        | 291 | 1.17 | 0.19 | 4.2E-01 | A             | 281 | 0.91 | 0.21 | 6.3E-01 |
| rs363338   | SLC18A2  | 10  | 118999379 | C   | 394 | 1.22 | 0.15 | 2.0E-01 | C                        | 292 | 1.32 | 0.18 | 1.2E-01 | C             | 281 | 1.06 | 0.20 | 7.8E-01 |
| rs363504   | GRIK1    | 21  | 29847799  | G   | 394 | 0.76 | 0.37 | 4.6E-01 | G                        | 292 | 0.64 | 0.47 | 3.5E-01 | G             | 281 | 0.83 | 0.45 | 6.8E-01 |
| rs363512   | GRIK1    | 21  | 29972688  | A   | 393 | 1.41 | 0.28 | 2.2E-01 | A                        | 291 | 1.08 | 0.36 | 8.4E-01 | A             | 280 | 1.80 | 0.33 | 7.2E-02 |
| rs363522   | GRIK1    | 21  | 29945097  | A   | 394 | 1.00 | 0.21 | 1.0E+00 | A                        | 292 | 0.70 | 0.28 | 2.0E-01 | A             | 281 | 1.33 | 0.24 | 2.4E-01 |

| SNP       | GENE     | CHR | BP        | TMD |     |      |      |         | TMD with widespread pain |     |      |      |         | Localized TMD |     |      |      |         |
|-----------|----------|-----|-----------|-----|-----|------|------|---------|--------------------------|-----|------|------|---------|---------------|-----|------|------|---------|
|           |          |     |           | A1  | N   | OR   | SE   | P       | A1                       | N   | OR   | SE   | P       | A1            | N   | OR   | SE   | P       |
| rs363526  | GRIK1    | 21  | 29936360  | C   | 393 | 0.90 | 0.14 | 4.6E-01 | C                        | 291 | 0.80 | 0.18 | 2.2E-01 | C             | 281 | 0.98 | 0.18 | 9.3E-01 |
| rs363602  | GRIK1    | 21  | 29990273  | T   | 394 | 1.59 | 0.40 | 2.5E-01 | T                        | 292 | 0.71 | 0.60 | 5.7E-01 | T             | 281 | 2.43 | 0.43 | 4.1E-02 |
| rs368365  | ACCN1    | 17  | 28568445  | G   | 394 | 1.62 | 0.17 | 5.7E-03 | G                        | 292 | 1.63 | 0.20 | 1.8E-02 | G             | 281 | 1.59 | 0.22 | 3.4E-02 |
| rs37067   | CACNA2D1 | 7   | 81438133  | A   | 394 | 0.90 | 0.16 | 4.8E-01 | A                        | 292 | 1.03 | 0.19 | 8.9E-01 | A             | 281 | 0.80 | 0.20 | 2.5E-01 |
| rs37089   | CACNA2D1 | 7   | 81448660  | A   | 394 | 1.25 | 0.16 | 1.6E-01 | A                        | 292 | 1.18 | 0.19 | 3.8E-01 | A             | 281 | 1.33 | 0.19 | 1.5E-01 |
| rs3729910 | MAPK1    | 22  | 20492126  | G   | 394 | 1.10 | 0.31 | 7.6E-01 | G                        | 292 | 0.99 | 0.38 | 9.9E-01 | G             | 281 | 1.23 | 0.38 | 5.9E-01 |
| rs3730013 | NOS2A    | 17  | 23150045  | A   | 394 | 1.01 | 0.16 | 9.4E-01 | A                        | 292 | 0.93 | 0.19 | 7.2E-01 | A             | 281 | 1.14 | 0.19 | 5.0E-01 |
| rs3730017 | NOS2A    | 17  | 23133229  | A   | 393 | 0.91 | 0.43 | 8.2E-01 | A                        | 291 | 0.64 | 0.60 | 4.5E-01 | A             | 280 | 1.30 | 0.50 | 6.0E-01 |
| rs3732378 | CX3CR1   | 3   | 39282166  | A   | 394 | 0.89 | 0.20 | 5.6E-01 | A                        | 292 | 1.02 | 0.23 | 9.2E-01 | A             | 281 | 0.72 | 0.26 | 2.1E-01 |
| rs3732379 | CX3CR1   | 3   | 39282260  | T   | 394 | 0.95 | 0.17 | 7.4E-01 | T                        | 292 | 0.94 | 0.20 | 7.5E-01 | T             | 281 | 0.90 | 0.21 | 6.3E-01 |
| rs3732566 | EPHB1    | 3   | 136381432 | T   | 394 | 0.98 | 0.15 | 8.8E-01 | T                        | 292 | 0.91 | 0.19 | 6.2E-01 | T             | 281 | 1.02 | 0.19 | 9.2E-01 |
| rs3732757 | P2RY13   | 3   | 152529294 | T   | 394 | 1.26 | 0.34 | 5.0E-01 | T                        | 292 | 1.46 | 0.39 | 3.4E-01 | T             | 281 | 1.09 | 0.46 | 8.6E-01 |
| rs3732790 | DRD3     | 3   | 115329973 | A   | 394 | 1.10 | 0.14 | 5.2E-01 | A                        | 292 | 1.29 | 0.18 | 1.4E-01 | A             | 281 | 0.89 | 0.18 | 5.3E-01 |
| rs3733469 | GABRB1   | 4   | 47123447  | G   | 394 | 1.00 | 0.34 | 1.0E+00 | G                        | 292 | 0.96 | 0.41 | 9.1E-01 | G             | 281 | 1.07 | 0.42 | 8.7E-01 |
| rs3733847 | CSNK1A1  | 5   | 148865565 | T   | 394 | 1.06 | 0.17 | 7.3E-01 | T                        | 292 | 0.82 | 0.22 | 3.5E-01 | T             | 281 | 1.30 | 0.21 | 2.1E-01 |
| rs3735517 | CACNA2D1 | 7   | 81431390  | A   | 394 | 0.88 | 0.17 | 4.4E-01 | A                        | 292 | 1.16 | 0.20 | 4.7E-01 | A             | 281 | 0.60 | 0.25 | 3.9E-02 |
| rs3736556 | AGTR2    | 23  | 115216363 | T   | 391 | 1.05 | 0.17 | 7.7E-01 | T                        | 290 | 1.07 | 0.20 | 7.4E-01 | T             | 279 | 1.03 | 0.21 | 9.0E-01 |
| rs3738447 | NLRP3    | 1   | 245655583 | A   | 393 | 1.09 | 0.31 | 7.7E-01 | A                        | 291 | 1.65 | 0.35 | 1.5E-01 | A             | 280 | 0.64 | 0.46 | 3.3E-01 |
| rs3739570 | NTRK2    | 9   | 86827398  | A   | 394 | 0.84 | 0.24 | 4.8E-01 | A                        | 292 | 1.07 | 0.27 | 8.0E-01 | A             | 281 | 0.63 | 0.34 | 1.8E-01 |
| rs3739723 | PPP3R2   | 9   | 103394171 | A   | 394 | 1.04 | 0.20 | 8.4E-01 | A                        | 292 | 0.83 | 0.26 | 4.6E-01 | A             | 281 | 1.28 | 0.24 | 3.0E-01 |
| rs3739724 | PPP3R2   | 9   | 103396260 | C   | 394 | 1.25 | 0.21 | 2.9E-01 | C                        | 292 | 0.87 | 0.28 | 6.1E-01 | C             | 281 | 1.67 | 0.25 | 4.3E-02 |
| rs3739959 | ANXA1    | 9   | 74973757  | A   | 394 | 0.94 | 0.14 | 6.7E-01 | A                        | 292 | 1.01 | 0.17 | 9.7E-01 | A             | 281 | 0.81 | 0.18 | 2.5E-01 |
| rs3740563 | GRK5     | 10  | 121085390 | A   | 394 | 0.86 | 0.23 | 5.0E-01 | A                        | 292 | 0.83 | 0.27 | 4.9E-01 | A             | 281 | 0.84 | 0.28 | 5.5E-01 |
| rs3741475 | NOS1     | 12  | 116154297 | A   | 393 | 0.93 | 0.18 | 6.9E-01 | A                        | 291 | 1.27 | 0.20 | 2.4E-01 | A             | 280 | 0.54 | 0.27 | 2.0E-02 |
| rs3741705 | SCN8A    | 12  | 50488291  | C   | 381 | 1.04 | 0.25 | 8.8E-01 | C                        | 282 | 0.90 | 0.31 | 7.4E-01 | C             | 272 | 1.15 | 0.31 | 6.5E-01 |
| rs3742065 | ATF1     | 12  | 49475886  | C   | 391 | 1.52 | 0.33 | 2.1E-01 | C                        | 289 | 1.56 | 0.45 | 3.2E-01 | C             | 279 | 2.20 | 0.41 | 5.3E-02 |
| rs3743268 | ANXA2    | 15  | 58465452  | A   | 394 | 1.00 | 0.15 | 1.0E+00 | A                        | 292 | 0.90 | 0.19 | 5.6E-01 | A             | 281 | 1.07 | 0.19 | 7.3E-01 |
| rs3746780 | NTSR1    | 20  | 60811731  | G   | 376 | 0.88 | 0.19 | 4.9E-01 | G                        | 279 | 0.89 | 0.23 | 5.9E-01 | G             | 270 | 0.88 | 0.23 | 5.7E-01 |
| rs3748328 | DDX24    | 14  | 93598835  | T   | 394 | 0.98 | 0.15 | 8.8E-01 | T                        | 292 | 1.05 | 0.18 | 7.8E-01 | T             | 281 | 0.96 | 0.19 | 8.1E-01 |
| rs3748960 | ERBB4    | 2   | 211956079 | C   | 394 | 0.61 | 0.36 | 1.7E-01 | C                        | 292 | 0.46 | 0.48 | 1.1E-01 | C             | 281 | 0.71 | 0.43 | 4.3E-01 |
| rs3748962 | ERBB4    | 2   | 211960109 | C   | 394 | 0.97 | 0.15 | 8.3E-01 | C                        | 292 | 1.04 | 0.18 | 8.3E-01 | C             | 281 | 0.88 | 0.18 | 4.9E-01 |
| rs3749692 | GDNF     | 5   | 37849905  | A   | 394 | 1.13 | 0.15 | 4.2E-01 | A                        | 292 | 1.35 | 0.18 | 1.0E-01 | A             | 281 | 0.97 | 0.19 | 8.9E-01 |
| rs3750717 | CPN1     | 10  | 101814944 | A   | 394 | 0.66 | 0.65 | 5.2E-01 | A                        | 292 | 0.90 | 0.72 | 8.8E-01 | A             | 281 | 0.33 | 1.09 | 3.1E-01 |
| rs3751142 | P2RX7    | 12  | 120106802 | T   | 383 | 1.01 | 0.32 | 9.9E-01 | T                        | 281 | 0.31 | 0.56 | 3.7E-02 | T             | 276 | 1.76 | 0.35 | 1.0E-01 |
| rs3751143 | P2RX7    | 12  | 120106687 | C   | 394 | 1.35 | 0.18 | 9.3E-02 | C                        | 292 | 1.09 | 0.22 | 6.9E-01 | C             | 281 | 1.56 | 0.22 | 4.2E-02 |
| rs3753472 | ADORA1   | 1   | 201398156 | C   | 392 | 1.10 | 0.15 | 5.5E-01 | C                        | 290 | 1.23 | 0.18 | 2.7E-01 | C             | 280 | 1.02 | 0.19 | 9.2E-01 |
| rs3754565 | PRKCE    | 2   | 46237853  | A   | 394 | 0.86 | 0.20 | 4.3E-01 | A                        | 292 | 0.72 | 0.25 | 1.9E-01 | A             | 281 | 1.09 | 0.24 | 7.1E-01 |
| rs3755459 | TACR1    | 2   | 75175111  | A   | 394 | 0.68 | 0.15 | 1.3E-02 | A                        | 292 | 0.75 | 0.18 | 1.1E-01 | A             | 281 | 0.63 | 0.20 | 2.0E-02 |
| rs3756450 | SLC6A3   | 5   | 1501148   | G   | 394 | 1.22 | 0.24 | 4.0E-01 | G                        | 292 | 1.23 | 0.29 | 4.8E-01 | G             | 281 | 1.25 | 0.30 | 4.6E-01 |



| SNP       | GENE     | CHR | BP        | TMD |     |      |      |         | TMD with widespread pain |     |      |      |         | Localized TMD |     |      |      |         |
|-----------|----------|-----|-----------|-----|-----|------|------|---------|--------------------------|-----|------|------|---------|---------------|-----|------|------|---------|
|           |          |     |           | A1  | N   | OR   | SE   | P       | A1                       | N   | OR   | SE   | P       | A1            | N   | OR   | SE   | P       |
| rs3756577 | CAMK2A   | 5   | 149608837 | T   | 394 | 1.45 | 0.20 | 6.2E-02 | T                        | 292 | 1.29 | 0.24 | 2.9E-01 | T             | 281 | 1.57 | 0.25 | 6.9E-02 |
| rs3756612 | CAMK4    | 5   | 110731386 | G   | 393 | 1.52 | 0.19 | 2.5E-02 | G                        | 291 | 2.15 | 0.23 | 8.3E-04 | G             | 281 | 1.08 | 0.24 | 7.6E-01 |
| rs3757173 | TNFAIP3  | 6   | 138231847 | G   | 394 | 0.65 | 0.27 | 1.1E-01 | G                        | 292 | 0.75 | 0.33 | 3.7E-01 | G             | 281 | 0.60 | 0.37 | 1.6E-01 |
| rs3757631 | CACNA2D1 | 7   | 81750084  | A   | 394 | 0.85 | 0.16 | 3.0E-01 | A                        | 292 | 0.85 | 0.19 | 4.0E-01 | A             | 281 | 0.87 | 0.20 | 5.1E-01 |
| rs3758790 | GRIA4    | 11  | 105355300 | G   | 394 | 0.90 | 0.15 | 5.0E-01 | G                        | 292 | 0.93 | 0.18 | 6.8E-01 | G             | 281 | 0.88 | 0.19 | 5.0E-01 |
| rs3758796 | GRIA4    | 11  | 105300118 | C   | 394 | 2.08 | 0.47 | 1.2E-01 | C                        | 292 | 2.53 | 0.55 | 9.5E-02 | C             | 281 | 2.09 | 0.59 | 2.1E-01 |
| rs3758802 | GRIA4    | 11  | 104985510 | G   | 394 | 0.72 | 0.41 | 4.2E-01 | G                        | 292 | 1.09 | 0.44 | 8.4E-01 | G             | 281 | 0.25 | 0.76 | 7.2E-02 |
| rs3758987 | HTR3B    | 11  | 113280485 | C   | 393 | 1.02 | 0.16 | 9.0E-01 | C                        | 291 | 1.02 | 0.20 | 9.3E-01 | C             | 281 | 1.00 | 0.21 | 1.0E+00 |
| rs3759911 | ANXA2    | 15  | 58461964  | T   | 393 | 0.91 | 0.17 | 5.9E-01 | T                        | 291 | 0.87 | 0.20 | 4.9E-01 | T             | 280 | 0.94 | 0.21 | 7.6E-01 |
| rs3760013 | ADCY7    | 16  | 48877218  | A   | 394 | 1.18 | 0.16 | 3.0E-01 | A                        | 292 | 1.13 | 0.19 | 5.2E-01 | A             | 281 | 1.19 | 0.20 | 3.9E-01 |
| rs3760572 | VPS4B    | 18  | 59241810  | T   | 394 | 0.88 | 0.14 | 3.7E-01 | T                        | 292 | 1.00 | 0.17 | 9.8E-01 | T             | 281 | 0.80 | 0.17 | 1.9E-01 |
| rs3760703 | PTGER1   | 19  | 14448982  | T   | 394 | 1.09 | 0.14 | 5.3E-01 | T                        | 292 | 0.90 | 0.17 | 5.4E-01 | T             | 281 | 1.35 | 0.18 | 9.3E-02 |
| rs3761554 | GRIA3    | 23  | 122144925 | C   | 394 | 0.80 | 0.28 | 4.1E-01 | C                        | 292 | 0.64 | 0.37 | 2.2E-01 | C             | 281 | 1.01 | 0.34 | 9.7E-01 |
| rs3761555 | GRIA3    | 23  | 122144118 | C   | 389 | 0.81 | 0.17 | 2.1E-01 | C                        | 288 | 1.01 | 0.20 | 9.6E-01 | C             | 278 | 0.65 | 0.25 | 7.7E-02 |
| rs3761685 | ATP1A2   | 1   | 158351267 | C   | 392 | 0.62 | 0.22 | 3.1E-02 | C                        | 290 | 0.53 | 0.29 | 3.0E-02 | C             | 281 | 0.74 | 0.27 | 2.6E-01 |
| rs3761977 | MAPK13   | 6   | 36204425  | A   | 394 | 1.24 | 0.14 | 1.4E-01 | A                        | 292 | 1.02 | 0.17 | 9.3E-01 | A             | 281 | 1.52 | 0.18 | 2.0E-02 |
| rs3761980 | MAPK14   | 6   | 36101884  | G   | 393 | 0.88 | 0.24 | 6.1E-01 | G                        | 291 | 0.76 | 0.34 | 4.1E-01 | G             | 280 | 1.21 | 0.30 | 5.3E-01 |
| rs3762321 | INADL    | 1   | 62026071  | A   | 394 | 0.82 | 0.26 | 4.4E-01 | A                        | 292 | 0.78 | 0.32 | 4.4E-01 | A             | 281 | 0.77 | 0.32 | 4.3E-01 |
| rs3762611 | GABRA4   | 4   | 46692045  | A   | 394 | 0.77 | 0.28 | 3.4E-01 | A                        | 292 | 0.94 | 0.31 | 8.4E-01 | A             | 281 | 0.57 | 0.40 | 1.5E-01 |
| rs3764030 | GRIN2B   | 12  | 14024599  | T   | 390 | 0.77 | 0.20 | 1.8E-01 | T                        | 289 | 0.82 | 0.24 | 4.0E-01 | T             | 278 | 0.70 | 0.25 | 1.5E-01 |
| rs3765550 | MPDZ     | 9   | 13098794  | C   | 393 | 1.06 | 0.14 | 6.7E-01 | C                        | 291 | 1.07 | 0.17 | 7.2E-01 | C             | 280 | 1.07 | 0.18 | 7.3E-01 |
| rs3766246 | FAAH     | 1   | 46638258  | A   | 394 | 1.15 | 0.15 | 3.4E-01 | A                        | 292 | 1.14 | 0.18 | 4.8E-01 | A             | 281 | 1.14 | 0.18 | 4.8E-01 |
| rs3766557 | ADORA1   | 1   | 201388699 | C   | 381 | 1.04 | 0.17 | 8.3E-01 | C                        | 285 | 1.21 | 0.20 | 3.4E-01 | C             | 269 | 0.88 | 0.22 | 5.7E-01 |
| rs3766560 | ADORA1   | 1   | 201385017 | T   | 391 | 1.34 | 0.18 | 1.1E-01 | T                        | 290 | 1.08 | 0.23 | 7.4E-01 | T             | 278 | 1.57 | 0.22 | 4.0E-02 |
| rs3766563 | ADORA1   | 1   | 201378318 | T   | 394 | 1.61 | 0.49 | 3.4E-01 | T                        | 292 | 1.87 | 0.55 | 2.6E-01 | T             | 281 | 1.16 | 0.64 | 8.1E-01 |
| rs3766566 | ADORA1   | 1   | 201371978 | A   | 394 | 0.80 | 0.17 | 2.0E-01 | A                        | 292 | 0.75 | 0.22 | 1.8E-01 | A             | 281 | 0.87 | 0.22 | 5.1E-01 |
| rs3768758 | PRKCE    | 2   | 46173506  | C   | 394 | 1.13 | 0.24 | 6.3E-01 | C                        | 292 | 1.40 | 0.28 | 2.2E-01 | C             | 281 | 0.84 | 0.34 | 6.1E-01 |
| rs376880  | CAMK4    | 5   | 110718462 | G   | 394 | 1.25 | 0.21 | 3.0E-01 | G                        | 292 | 1.07 | 0.26 | 8.1E-01 | G             | 281 | 1.31 | 0.25 | 2.8E-01 |
| rs3769616 | XDH      | 2   | 31483886  | T   | 393 | 0.79 | 0.34 | 4.9E-01 | T                        | 291 | 1.04 | 0.39 | 9.1E-01 | T             | 280 | 0.53 | 0.51 | 2.1E-01 |
| rs3769931 | SCN2A    | 2   | 165864479 | G   | 393 | 0.98 | 0.17 | 9.0E-01 | G                        | 291 | 0.84 | 0.22 | 4.3E-01 | G             | 280 | 1.11 | 0.21 | 6.0E-01 |
| rs3770761 | PRKD3    | 2   | 37360443  | G   | 394 | 1.04 | 0.27 | 8.9E-01 | G                        | 292 | 0.96 | 0.34 | 9.0E-01 | G             | 281 | 1.01 | 0.34 | 9.7E-01 |
| rs3770764 | PRKD3    | 2   | 37343381  | A   | 394 | 1.01 | 0.15 | 9.4E-01 | A                        | 292 | 1.26 | 0.19 | 2.1E-01 | A             | 281 | 0.81 | 0.20 | 2.8E-01 |
| rs3771083 | CALCRL   | 2   | 187956839 | G   | 394 | 1.00 | 0.22 | 1.0E+00 | G                        | 292 | 0.92 | 0.27 | 7.5E-01 | G             | 281 | 1.10 | 0.28 | 7.4E-01 |
| rs3771095 | CALCRL   | 2   | 187919357 | T   | 394 | 1.03 | 0.22 | 9.1E-01 | T                        | 292 | 0.92 | 0.27 | 7.5E-01 | T             | 281 | 1.16 | 0.28 | 6.0E-01 |
| rs3771827 | TACR1    | 2   | 75215372  | T   | 394 | 0.81 | 0.14 | 1.4E-01 | T                        | 292 | 0.70 | 0.17 | 3.4E-02 | T             | 281 | 0.95 | 0.18 | 7.6E-01 |
| rs3771859 | TACR1    | 2   | 75269078  | G   | 394 | 1.08 | 0.16 | 6.3E-01 | G                        | 292 | 1.02 | 0.20 | 9.1E-01 | G             | 281 | 1.10 | 0.20 | 6.4E-01 |
| rs3772031 | KCNIP3   | 2   | 95378618  | G   | 393 | 1.09 | 0.16 | 6.0E-01 | G                        | 291 | 1.00 | 0.20 | 1.0E+00 | G             | 281 | 1.23 | 0.20 | 2.9E-01 |
| rs3772608 | AGTR1    | 3   | 149937364 | A   | 394 | 0.84 | 0.30 | 5.5E-01 | A                        | 292 | 0.63 | 0.41 | 2.6E-01 | A             | 281 | 1.06 | 0.36 | 8.8E-01 |
| rs3772616 | AGTR1    | 3   | 149920881 | T   | 394 | 1.15 | 0.19 | 4.6E-01 | T                        | 292 | 0.85 | 0.24 | 4.9E-01 | T             | 281 | 1.55 | 0.23 | 5.6E-02 |

| SNP       | GENE     | CHR | BP        | TMD |     |      |      |         | TMD with widespread pain |     |      |      |         | Localized TMD |     |      |      |         |
|-----------|----------|-----|-----------|-----|-----|------|------|---------|--------------------------|-----|------|------|---------|---------------|-----|------|------|---------|
|           |          |     |           | A1  | N   | OR   | SE   | P       | A1                       | N   | OR   | SE   | P       | A1            | N   | OR   | SE   | P       |
| rs3773678 | DRD3     | 3   | 115352768 | A   | 393 | 1.02 | 0.22 | 9.3E-01 | A                        | 291 | 0.95 | 0.27 | 8.6E-01 | A             | 280 | 1.20 | 0.27 | 5.0E-01 |
| rs3773732 | PRKCD    | 3   | 53175916  | A   | 392 | 1.28 | 0.17 | 1.5E-01 | A                        | 290 | 1.45 | 0.21 | 7.4E-02 | A             | 281 | 1.13 | 0.22 | 5.7E-01 |
| rs3773876 | MME      | 3   | 156364981 | T   | 394 | 1.09 | 0.16 | 5.8E-01 | T                        | 292 | 1.19 | 0.19 | 3.6E-01 | T             | 281 | 0.96 | 0.20 | 8.4E-01 |
| rs3773885 | MME      | 3   | 156342275 | A   | 394 | 1.01 | 0.15 | 9.4E-01 | A                        | 292 | 0.93 | 0.18 | 6.9E-01 | A             | 281 | 1.09 | 0.18 | 6.5E-01 |
| rs3774116 | SLC6A11  | 3   | 10876101  | G   | 394 | 0.79 | 0.40 | 5.5E-01 | G                        | 292 | 0.91 | 0.46 | 8.3E-01 | G             | 281 | 0.59 | 0.56 | 3.4E-01 |
| rs3774125 | SLC6A11  | 3   | 10856159  | G   | 394 | 0.50 | 0.39 | 7.0E-02 | G                        | 292 | 0.61 | 0.46 | 2.7E-01 | G             | 281 | 0.38 | 0.56 | 8.4E-02 |
| rs3776573 | SLC1A3   | 5   | 36681951  | G   | 394 | 1.11 | 0.17 | 5.5E-01 | G                        | 292 | 0.96 | 0.21 | 8.6E-01 | G             | 281 | 1.19 | 0.21 | 4.0E-01 |
| rs3776825 | CAMK2A   | 5   | 149600864 | A   | 390 | 1.18 | 0.16 | 3.0E-01 | A                        | 289 | 1.13 | 0.20 | 5.5E-01 | A             | 278 | 1.27 | 0.20 | 2.4E-01 |
| rs3779449 | CACNA2D1 | 7   | 81878689  | T   | 394 | 1.12 | 0.20 | 5.5E-01 | T                        | 292 | 1.12 | 0.24 | 6.4E-01 | T             | 281 | 1.15 | 0.25 | 5.8E-01 |
| rs3780445 | GABBR2   | 9   | 100111427 | C   | 393 | 1.23 | 0.20 | 3.0E-01 | C                        | 291 | 1.16 | 0.24 | 5.4E-01 | C             | 280 | 1.39 | 0.24 | 1.8E-01 |
| rs3780446 | GABBR2   | 9   | 100111383 | T   | 394 | 1.16 | 0.16 | 3.5E-01 | T                        | 292 | 1.11 | 0.19 | 5.9E-01 | T             | 281 | 1.27 | 0.19 | 2.1E-01 |
| rs3780632 | NTRK2    | 9   | 86542608  | C   | 394 | 1.13 | 0.15 | 4.2E-01 | C                        | 292 | 1.25 | 0.18 | 2.1E-01 | C             | 281 | 1.08 | 0.19 | 6.9E-01 |
| rs3781109 | GAD2     | 10  | 26608368  | G   | 394 | 0.98 | 0.16 | 8.8E-01 | G                        | 292 | 1.11 | 0.19 | 5.9E-01 | G             | 281 | 0.83 | 0.20 | 3.3E-01 |
| rs3781116 | GAD2     | 10  | 26556523  | T   | 394 | 1.07 | 0.26 | 7.9E-01 | T                        | 292 | 1.32 | 0.31 | 3.7E-01 | T             | 281 | 0.79 | 0.36 | 5.1E-01 |
| rs3781495 | GRK5     | 10  | 121146129 | C   | 386 | 0.57 | 0.64 | 3.7E-01 | C                        | 287 | 0.30 | 1.09 | 2.7E-01 | C             | 277 | 1.02 | 0.72 | 9.8E-01 |
| rs3781894 | P2RX3    | 11  | 56894237  | A   | 393 | 0.94 | 0.14 | 6.8E-01 | A                        | 291 | 1.14 | 0.17 | 4.6E-01 | A             | 280 | 0.77 | 0.18 | 1.5E-01 |
| rs3781902 | P2RX3    | 11  | 56876623  | A   | 394 | 0.88 | 0.14 | 3.6E-01 | A                        | 292 | 0.67 | 0.18 | 2.8E-02 | A             | 281 | 1.08 | 0.18 | 6.8E-01 |
| rs3782025 | HTR3B    | 11  | 113312817 | G   | 394 | 1.10 | 0.15 | 5.1E-01 | G                        | 292 | 1.00 | 0.18 | 9.8E-01 | G             | 281 | 1.27 | 0.19 | 2.0E-01 |
| rs3782202 | NOS1     | 12  | 116204763 | G   | 393 | 0.83 | 0.18 | 3.0E-01 | G                        | 291 | 0.91 | 0.22 | 6.6E-01 | G             | 280 | 0.76 | 0.23 | 2.4E-01 |
| rs3782221 | NOS1     | 12  | 116280264 | A   | 394 | 0.96 | 0.17 | 8.0E-01 | A                        | 292 | 1.03 | 0.20 | 8.7E-01 | A             | 281 | 0.97 | 0.21 | 8.8E-01 |
| rs3782478 | SCN8A    | 12  | 50354263  | G   | 393 | 0.98 | 0.14 | 8.8E-01 | G                        | 291 | 0.99 | 0.17 | 9.6E-01 | G             | 281 | 1.02 | 0.18 | 9.2E-01 |
| rs3783298 | PRKD1    | 14  | 29136680  | G   | 394 | 0.94 | 0.15 | 7.0E-01 | G                        | 292 | 1.00 | 0.19 | 9.8E-01 | G             | 281 | 0.86 | 0.20 | 4.5E-01 |
| rs3783299 | PRKD1    | 14  | 29136727  | T   | 394 | 0.93 | 0.15 | 6.5E-01 | T                        | 292 | 0.97 | 0.19 | 8.8E-01 | T             | 281 | 0.86 | 0.20 | 4.5E-01 |
| rs3783305 | PRKD1    | 14  | 29238337  | T   | 394 | 0.98 | 0.14 | 8.8E-01 | T                        | 292 | 1.04 | 0.18 | 8.4E-01 | T             | 281 | 0.88 | 0.19 | 4.9E-01 |
| rs3783641 | GCH1     | 14  | 54429889  | A   | 394 | 0.86 | 0.17 | 3.9E-01 | A                        | 292 | 0.83 | 0.22 | 4.0E-01 | A             | 281 | 0.87 | 0.21 | 5.2E-01 |
| rs3783736 | ESR2     | 14  | 63821125  | T   | 394 | 1.03 | 0.14 | 8.3E-01 | T                        | 292 | 1.23 | 0.17 | 2.3E-01 | T             | 281 | 0.87 | 0.18 | 4.4E-01 |
| rs3785143 | SLC6A2   | 16  | 54252607  | T   | 394 | 1.40 | 0.25 | 1.8E-01 | T                        | 292 | 1.74 | 0.29 | 5.8E-02 | T             | 281 | 1.13 | 0.32 | 7.2E-01 |
| rs3785152 | SLC6A2   | 16  | 54274051  | T   | 394 | 1.03 | 0.24 | 9.0E-01 | T                        | 292 | 0.87 | 0.32 | 6.7E-01 | T             | 281 | 1.10 | 0.29 | 7.5E-01 |
| rs3786467 | AIM      | 18  | 53289804  | A   | 394 | 1.32 | 0.43 | 5.3E-01 | A                        | 292 | 1.74 | 0.49 | 2.5E-01 | A             | 281 | 0.78 | 0.64 | 7.0E-01 |
| rs3787138 | CHRNA4   | 20  | 61449668  | G   | 394 | 1.26 | 0.23 | 3.1E-01 | G                        | 292 | 1.19 | 0.27 | 5.1E-01 | G             | 281 | 1.26 | 0.28 | 4.2E-01 |
| rs3787535 | NTSR1    | 20  | 60823966  | A   | 394 | 0.97 | 0.15 | 8.2E-01 | A                        | 292 | 1.10 | 0.17 | 6.0E-01 | A             | 281 | 0.88 | 0.19 | 5.0E-01 |
| rs3787639 | APP      | 21  | 26303053  | A   | 392 | 0.97 | 0.19 | 8.5E-01 | A                        | 290 | 0.77 | 0.24 | 2.7E-01 | A             | 280 | 1.22 | 0.23 | 3.8E-01 |
| rs3787870 | KCNJ6    | 21  | 38207323  | G   | 394 | 0.80 | 0.14 | 1.2E-01 | G                        | 292 | 0.76 | 0.17 | 1.0E-01 | G             | 281 | 0.88 | 0.18 | 4.7E-01 |
| rs3788061 | CRYAA    | 21  | 43464191  | A   | 383 | 1.22 | 0.31 | 5.1E-01 | A                        | 283 | 1.38 | 0.35 | 3.6E-01 | A             | 275 | 1.20 | 0.40 | 6.6E-01 |
| rs3788979 | DPP4     | 2   | 162609135 | T   | 394 | 1.02 | 0.21 | 9.2E-01 | T                        | 292 | 1.15 | 0.25 | 5.9E-01 | T             | 281 | 0.91 | 0.28 | 7.5E-01 |
| rs3790043 | DDX24    | 14  | 93616218  | G   | 391 | 1.00 | 0.15 | 9.9E-01 | G                        | 289 | 1.03 | 0.18 | 8.6E-01 | G             | 279 | 0.98 | 0.18 | 9.1E-01 |
| rs3791699 | ERBB4    | 2   | 211982692 | A   | 394 | 1.15 | 0.17 | 4.3E-01 | A                        | 292 | 1.24 | 0.21 | 3.0E-01 | A             | 281 | 1.08 | 0.22 | 7.2E-01 |
| rs3791878 | GAD1     | 2   | 171380437 | T   | 394 | 0.88 | 0.16 | 4.3E-01 | T                        | 292 | 0.72 | 0.20 | 9.7E-02 | T             | 281 | 1.10 | 0.20 | 6.3E-01 |
| rs3792208 | GABRA4   | 4   | 46668795  | A   | 394 | 0.78 | 0.23 | 3.0E-01 | A                        | 292 | 0.78 | 0.28 | 3.7E-01 | A             | 281 | 0.72 | 0.31 | 2.7E-01 |

| SNP       | GENE     | CHR | BP        | TMD |     |      |      |         | TMD with widespread pain |     |      |      |         | Localized TMD |     |      |      |         |
|-----------|----------|-----|-----------|-----|-----|------|------|---------|--------------------------|-----|------|------|---------|---------------|-----|------|------|---------|
|           |          |     |           | A1  | N   | OR   | SE   | P       | A1                       | N   | OR   | SE   | P       | A1            | N   | OR   | SE   | P       |
| rs3792311 | ACSL1    | 4   | 185932318 | A   | 394 | 0.94 | 0.16 | 7.0E-01 | A                        | 292 | 1.04 | 0.19 | 8.3E-01 | A             | 281 | 0.77 | 0.20 | 1.9E-01 |
| rs3792738 | CRHBP    | 5   | 76283540  | A   | 394 | 1.19 | 0.24 | 4.7E-01 | A                        | 292 | 1.25 | 0.30 | 4.5E-01 | A             | 281 | 1.25 | 0.30 | 4.6E-01 |
| rs3793768 | SCD      | 10  | 102105764 | T   | 394 | 0.88 | 0.15 | 3.8E-01 | T                        | 292 | 1.01 | 0.18 | 9.7E-01 | T             | 281 | 0.78 | 0.19 | 1.8E-01 |
| rs3793993 | CCKBR    | 11  | 6242129   | C   | 394 | 1.07 | 0.18 | 7.2E-01 | C                        | 292 | 1.02 | 0.22 | 9.3E-01 | C             | 281 | 1.10 | 0.22 | 6.7E-01 |
| rs3794186 | TCIRG1   | 11  | 67577612  | A   | 394 | 0.92 | 0.29 | 7.7E-01 | A                        | 292 | 1.01 | 0.34 | 9.9E-01 | A             | 281 | 0.81 | 0.37 | 5.7E-01 |
| rs3794808 | SLC6A4   | 17  | 25555919  | T   | 394 | 0.81 | 0.14 | 1.3E-01 | T                        | 292 | 0.87 | 0.17 | 4.1E-01 | T             | 281 | 0.82 | 0.18 | 2.8E-01 |
| rs3796285 | AIM      | 3   | 189735795 | A   | 394 | 1.09 | 0.14 | 5.4E-01 | A                        | 292 | 1.18 | 0.17 | 3.2E-01 | A             | 281 | 1.03 | 0.17 | 8.7E-01 |
| rs3797739 | CAMK4    | 5   | 110810173 | C   | 394 | 1.21 | 0.16 | 2.5E-01 | C                        | 292 | 1.38 | 0.19 | 9.9E-02 | C             | 281 | 1.03 | 0.21 | 8.9E-01 |
| rs3797746 | CAMK4    | 5   | 110786988 | C   | 394 | 0.93 | 0.14 | 6.3E-01 | C                        | 292 | 0.85 | 0.17 | 3.5E-01 | C             | 281 | 1.08 | 0.17 | 6.7E-01 |
| rs3798575 | ESR1     | 6   | 152438096 | G   | 394 | 1.05 | 0.21 | 8.3E-01 | G                        | 292 | 0.90 | 0.27 | 7.1E-01 | G             | 281 | 1.08 | 0.26 | 7.6E-01 |
| rs3798577 | ESR1     | 6   | 152462823 | C   | 393 | 0.85 | 0.14 | 2.6E-01 | C                        | 291 | 0.78 | 0.17 | 1.5E-01 | C             | 281 | 0.94 | 0.18 | 7.2E-01 |
| rs379944  | OPRD1    | 1   | 29072586  | T   | 394 | 0.78 | 0.32 | 4.3E-01 | T                        | 292 | 0.99 | 0.37 | 9.7E-01 | T             | 281 | 0.61 | 0.45 | 2.8E-01 |
| rs3800473 | PACSL1   | 6   | 34544948  | A   | 394 | 1.01 | 0.17 | 9.3E-01 | A                        | 292 | 0.99 | 0.20 | 9.6E-01 | A             | 281 | 1.10 | 0.21 | 6.7E-01 |
| rs3800787 | NOS3     | 7   | 150344569 | C   | 388 | 1.10 | 0.15 | 5.3E-01 | C                        | 287 | 1.09 | 0.18 | 6.3E-01 | C             | 276 | 1.10 | 0.19 | 6.2E-01 |
| rs3801101 | ETV1     | 7   | 13967654  | C   | 394 | 1.45 | 0.33 | 2.6E-01 | C                        | 292 | 1.44 | 0.39 | 3.5E-01 | C             | 281 | 1.49 | 0.40 | 3.2E-01 |
| rs3801734 | CACNA2D1 | 7   | 81624853  | G   | 393 | 1.01 | 0.15 | 9.6E-01 | G                        | 292 | 1.19 | 0.17 | 3.3E-01 | G             | 280 | 0.81 | 0.19 | 2.8E-01 |
| rs3801742 | CACNA2D1 | 7   | 81618705  | G   | 394 | 1.02 | 0.15 | 8.8E-01 | G                        | 292 | 1.18 | 0.18 | 3.5E-01 | G             | 281 | 0.89 | 0.19 | 5.4E-01 |
| rs380400  | AGTR1    | 3   | 149943390 | G   | 392 | 1.11 | 0.23 | 6.5E-01 | G                        | 291 | 1.10 | 0.27 | 7.3E-01 | G             | 279 | 1.05 | 0.29 | 8.7E-01 |
| rs3804158 | FGF2     | 4   | 124034350 | G   | 394 | 0.86 | 0.15 | 3.1E-01 | G                        | 292 | 1.00 | 0.18 | 9.9E-01 | G             | 281 | 0.74 | 0.19 | 1.1E-01 |
| rs3804350 | PPP3CA   | 4   | 102166953 | T   | 394 | 1.17 | 0.17 | 3.6E-01 | T                        | 292 | 1.05 | 0.21 | 8.1E-01 | T             | 281 | 1.29 | 0.20 | 2.2E-01 |
| rs3804357 | PPP3CA   | 4   | 102221146 | A   | 393 | 1.10 | 0.15 | 5.4E-01 | A                        | 291 | 0.92 | 0.18 | 6.5E-01 | A             | 280 | 1.27 | 0.19 | 2.0E-01 |
| rs3804452 | MAPK14   | 6   | 36184912  | A   | 394 | 0.76 | 0.25 | 2.7E-01 | A                        | 292 | 0.99 | 0.28 | 9.8E-01 | A             | 281 | 0.46 | 0.37 | 3.8E-02 |
| rs3804772 | ATP1B3   | 3   | 143116746 | A   | 393 | 0.80 | 0.22 | 3.1E-01 | A                        | 291 | 0.64 | 0.30 | 1.3E-01 | A             | 280 | 0.91 | 0.27 | 7.4E-01 |
| rs3806268 | NLRP3    | 1   | 245654100 | G   | 393 | 0.99 | 0.15 | 9.4E-01 | G                        | 291 | 0.98 | 0.17 | 9.1E-01 | G             | 281 | 1.06 | 0.18 | 7.3E-01 |
| rs3806460 | ATF3     | 1   | 210805458 | T   | 389 | 0.93 | 0.20 | 7.0E-01 | T                        | 287 | 0.86 | 0.26 | 5.4E-01 | T             | 277 | 1.14 | 0.25 | 5.9E-01 |
| rs3806545 | HTR2B    | 2   | 231698344 | C   | 394 | 2.13 | 0.39 | 5.2E-02 | C                        | 292 | 2.11 | 0.46 | 1.0E-01 | C             | 281 | 1.99 | 0.45 | 1.2E-01 |
| rs3806919 | GNB2L1   | 5   | 180603607 | A   | 394 | 1.31 | 0.37 | 4.6E-01 | A                        | 292 | 1.32 | 0.43 | 5.2E-01 | A             | 281 | 1.17 | 0.46 | 7.3E-01 |
| rs3808627 | OPRK1    | 8   | 54327355  | T   | 394 | 1.14 | 0.19 | 5.0E-01 | T                        | 292 | 1.21 | 0.23 | 4.0E-01 | T             | 281 | 1.05 | 0.24 | 8.3E-01 |
| rs3809418 | BDKRB2   | 14  | 95778983  | A   | 394 | 0.84 | 0.42 | 6.8E-01 | A                        | 292 | 1.05 | 0.47 | 9.1E-01 | A             | 281 | 0.53 | 0.63 | 3.1E-01 |
| rs3810568 | ADRA1D   | 20  | 4179258   | C   | 394 | 0.71 | 0.28 | 2.2E-01 | C                        | 292 | 1.18 | 0.32 | 6.1E-01 | C             | 281 | 0.43 | 0.44 | 5.5E-02 |
| rs3811992 | GABRA6   | 5   | 161049520 | A   | 394 | 0.84 | 0.14 | 2.3E-01 | A                        | 292 | 0.83 | 0.17 | 2.9E-01 | A             | 281 | 0.86 | 0.19 | 4.2E-01 |
| rs3811995 | GABRA6   | 5   | 161045271 | C   | 394 | 0.84 | 0.14 | 2.3E-01 | C                        | 292 | 0.83 | 0.17 | 2.9E-01 | C             | 281 | 0.86 | 0.19 | 4.2E-01 |
| rs3813353 | TAAR2    | 6   | 132971285 | G   | 394 | 1.17 | 0.57 | 7.8E-01 | G                        | 292 | 1.53 | 0.62 | 4.9E-01 | G             | 281 | 0.67 | 0.83 | 6.2E-01 |
| rs3813354 | TAAR5    | 6   | 132952327 | T   | 394 | 1.09 | 0.24 | 7.2E-01 | T                        | 292 | 1.08 | 0.28 | 7.8E-01 | T             | 281 | 0.98 | 0.32 | 9.5E-01 |
| rs3813355 | TAAR5    | 6   | 132952305 | G   | 394 | 1.11 | 0.15 | 5.0E-01 | G                        | 292 | 1.18 | 0.18 | 3.6E-01 | G             | 281 | 1.02 | 0.20 | 9.3E-01 |
| rs3813470 | GRIA1    | 5   | 153124409 | A   | 394 | 1.09 | 0.14 | 5.3E-01 | A                        | 292 | 1.09 | 0.17 | 6.3E-01 | A             | 281 | 1.11 | 0.18 | 5.6E-01 |
| rs3813605 | GNG5     | 1   | 84743535  | T   | 393 | 1.14 | 0.18 | 4.8E-01 | T                        | 291 | 1.30 | 0.22 | 2.2E-01 | T             | 280 | 0.93 | 0.25 | 7.6E-01 |
| rs3813865 | CYP2E1   | 10  | 135189234 | C   | 393 | 1.08 | 0.41 | 8.5E-01 | C                        | 291 | 1.68 | 0.48 | 2.8E-01 | C             | 280 | 0.80 | 0.61 | 7.1E-01 |
| rs3813867 | CYP2E1   | 10  | 135189595 | C   | 394 | 1.20 | 0.42 | 6.7E-01 | C                        | 292 | 1.88 | 0.49 | 1.9E-01 | C             | 281 | 0.89 | 0.61 | 8.6E-01 |

| SNP       | GENE     | CHR | BP        | TMD |     |      |      |         | TMD with widespread pain |     |      |      |         | Localized TMD |     |      |      |         |
|-----------|----------|-----|-----------|-----|-----|------|------|---------|--------------------------|-----|------|------|---------|---------------|-----|------|------|---------|
|           |          |     |           | A1  | N   | OR   | SE   | P       | A1                       | N   | OR   | SE   | P       | A1            | N   | OR   | SE   | P       |
| rs3813928 | HTR2C    | 23  | 113724538 | A   | 392 | 1.70 | 0.19 | 5.3E-03 | A                        | 291 | 1.64 | 0.23 | 2.8E-02 | A             | 280 | 1.79 | 0.23 | 1.2E-02 |
| rs3813929 | HTR2C    | 23  | 113724776 | T   | 393 | 1.69 | 0.19 | 5.9E-03 | T                        | 292 | 1.62 | 0.23 | 3.2E-02 | T             | 280 | 1.79 | 0.23 | 1.2E-02 |
| rs3816027 | CACNA1A  | 19  | 13196432  | G   | 393 | 0.93 | 0.15 | 6.0E-01 | G                        | 292 | 0.93 | 0.18 | 6.9E-01 | G             | 280 | 0.87 | 0.19 | 4.7E-01 |
| rs3816596 | GABRB2   | 5   | 160907910 | T   | 393 | 1.00 | 0.14 | 9.8E-01 | T                        | 292 | 1.06 | 0.17 | 7.2E-01 | T             | 280 | 0.93 | 0.19 | 7.0E-01 |
| rs3821664 | P2RY12   | 3   | 152584995 | G   | 394 | 1.40 | 0.29 | 2.5E-01 | G                        | 292 | 1.65 | 0.33 | 1.3E-01 | G             | 281 | 1.13 | 0.40 | 7.6E-01 |
| rs3821667 | P2RY12   | 3   | 152541131 | A   | 394 | 1.32 | 0.19 | 1.5E-01 | A                        | 292 | 1.06 | 0.26 | 8.1E-01 | A             | 281 | 1.66 | 0.23 | 3.0E-02 |
| rs3821767 | SLC6A11  | 3   | 10898941  | A   | 390 | 0.71 | 0.24 | 1.5E-01 | A                        | 289 | 0.84 | 0.28 | 5.3E-01 | A             | 277 | 0.58 | 0.34 | 1.1E-01 |
| rs3822222 | CCKAR    | 4   | 26099750  | A   | 394 | 1.11 | 0.22 | 6.6E-01 | A                        | 292 | 0.92 | 0.28 | 7.6E-01 | A             | 281 | 1.39 | 0.27 | 2.2E-01 |
| rs3823920 | CACNA2D1 | 7   | 81618658  | T   | 392 | 0.97 | 0.15 | 8.4E-01 | T                        | 290 | 1.07 | 0.18 | 7.2E-01 | T             | 281 | 0.89 | 0.19 | 5.5E-01 |
| rs3825103 | NOS1     | 12  | 116224892 | C   | 394 | 1.15 | 0.20 | 4.8E-01 | C                        | 292 | 0.96 | 0.25 | 8.7E-01 | C             | 281 | 1.30 | 0.24 | 2.7E-01 |
| rs3826501 | TRPV1    | 17  | 3435560   | T   | 394 | 0.96 | 0.17 | 8.0E-01 | T                        | 292 | 0.96 | 0.20 | 8.4E-01 | T             | 281 | 0.97 | 0.21 | 8.9E-01 |
| rs3827199 | KCNJ6    | 21  | 38149472  | A   | 394 | 1.01 | 0.14 | 9.4E-01 | A                        | 292 | 1.08 | 0.17 | 6.6E-01 | A             | 281 | 0.97 | 0.18 | 8.8E-01 |
| rs3829161 | CPN1     | 10  | 101815150 | G   | 394 | 0.79 | 0.14 | 9.6E-02 | G                        | 292 | 0.73 | 0.17 | 6.2E-02 | G             | 281 | 0.82 | 0.17 | 2.5E-01 |
| rs3829708 | P2RY4    | 23  | 69395474  | T   | 394 | 0.92 | 0.28 | 7.8E-01 | T                        | 292 | 0.87 | 0.35 | 6.8E-01 | T             | 281 | 0.97 | 0.36 | 9.3E-01 |
| rs3829709 | P2RY4    | 23  | 69395500  | C   | 394 | 0.92 | 0.28 | 7.8E-01 | C                        | 292 | 0.87 | 0.35 | 6.8E-01 | C             | 281 | 0.97 | 0.36 | 9.3E-01 |
| rs3829897 | DDC      | 7   | 50597258  | T   | 393 | 1.20 | 0.15 | 2.3E-01 | T                        | 291 | 1.28 | 0.18 | 1.7E-01 | T             | 280 | 1.11 | 0.19 | 5.8E-01 |
| rs3842788 | PTGS1    | 9   | 124180027 | A   | 394 | 1.43 | 0.43 | 4.1E-01 | A                        | 292 | 1.38 | 0.49 | 5.1E-01 | A             | 281 | 1.37 | 0.54 | 5.6E-01 |
| rs3846866 | PACSIN1  | 6   | 34551900  | T   | 394 | 1.22 | 0.14 | 1.7E-01 | T                        | 292 | 1.30 | 0.17 | 1.3E-01 | T             | 281 | 1.13 | 0.18 | 5.1E-01 |
| rs3846867 | PACSIN1  | 6   | 34556293  | C   | 394 | 1.03 | 0.14 | 8.4E-01 | C                        | 292 | 0.88 | 0.17 | 4.6E-01 | C             | 281 | 1.24 | 0.17 | 2.1E-01 |
| rs3848328 | GRIN2A   | 16  | 10002888  | A   | 393 | 0.91 | 0.16 | 5.4E-01 | A                        | 291 | 0.91 | 0.20 | 6.2E-01 | A             | 280 | 0.92 | 0.20 | 6.7E-01 |
| rs3852745 | GRIN2A   | 16  | 10156361  | T   | 394 | 1.09 | 0.16 | 5.8E-01 | T                        | 292 | 1.07 | 0.19 | 7.2E-01 | T             | 281 | 1.16 | 0.20 | 4.6E-01 |
| rs38557   | CACNA2D1 | 7   | 81720845  | G   | 394 | 1.15 | 0.15 | 3.6E-01 | G                        | 292 | 1.26 | 0.18 | 2.1E-01 | G             | 281 | 1.06 | 0.20 | 7.8E-01 |
| rs387661  | GABRG2   | 5   | 161476289 | G   | 390 | 1.33 | 0.19 | 1.4E-01 | G                        | 288 | 1.34 | 0.23 | 2.1E-01 | G             | 278 | 1.36 | 0.24 | 2.0E-01 |
| rs3887820 | KCNA2    | 1   | 110949603 | A   | 377 | 0.60 | 0.29 | 8.2E-02 | A                        | 281 | 0.74 | 0.34 | 3.8E-01 | A             | 271 | 0.39 | 0.43 | 3.1E-02 |
| rs390200  | DLG4     | 17  | 7050719   | A   | 388 | 0.84 | 0.15 | 2.4E-01 | A                        | 287 | 0.75 | 0.18 | 1.1E-01 | A             | 278 | 0.92 | 0.18 | 6.6E-01 |
| rs3904668 | PACSIN1  | 6   | 34571988  | G   | 393 | 0.97 | 0.14 | 8.3E-01 | G                        | 291 | 0.87 | 0.18 | 4.2E-01 | G             | 281 | 1.13 | 0.18 | 4.8E-01 |
| rs3912537 | AIM      | 8   | 62354583  | G   | 394 | 0.75 | 0.22 | 1.9E-01 | G                        | 292 | 0.71 | 0.27 | 2.2E-01 | G             | 281 | 0.82 | 0.27 | 4.6E-01 |
| rs3918226 | NOS3     | 7   | 150321109 | T   | 394 | 0.70 | 0.27 | 1.9E-01 | T                        | 292 | 0.67 | 0.34 | 2.3E-01 | T             | 281 | 0.71 | 0.34 | 3.1E-01 |
| rs3923011 | PRKCE    | 2   | 45883745  | A   | 394 | 0.99 | 0.17 | 9.3E-01 | A                        | 292 | 0.99 | 0.20 | 9.6E-01 | A             | 281 | 1.01 | 0.21 | 9.5E-01 |
| rs3924001 | SCN9A    | 2   | 166844835 | A   | 394 | 0.96 | 0.15 | 7.7E-01 | A                        | 292 | 1.18 | 0.18 | 3.4E-01 | A             | 281 | 0.78 | 0.19 | 1.9E-01 |
| rs3924523 | PRKCE    | 2   | 45848854  | G   | 394 | 0.75 | 0.25 | 2.6E-01 | G                        | 292 | 0.89 | 0.29 | 7.0E-01 | G             | 281 | 0.51 | 0.36 | 6.3E-02 |
| rs3924999 | NRG1     | 8   | 32572900  | A   | 394 | 0.98 | 0.14 | 8.9E-01 | A                        | 292 | 1.02 | 0.17 | 9.0E-01 | A             | 281 | 0.94 | 0.19 | 7.4E-01 |
| rs3934936 | SCN5A    | 3   | 38639313  | T   | 394 | 0.99 | 0.16 | 9.3E-01 | T                        | 292 | 0.94 | 0.20 | 7.4E-01 | T             | 281 | 1.03 | 0.20 | 8.8E-01 |
| rs394886  | ACCN1    | 17  | 28551621  | T   | 394 | 1.05 | 0.32 | 8.7E-01 | T                        | 292 | 1.05 | 0.40 | 9.0E-01 | T             | 281 | 1.19 | 0.40 | 6.6E-01 |
| rs395357  | TRPV3    | 17  | 3382830   | T   | 393 | 1.11 | 0.14 | 4.8E-01 | T                        | 291 | 1.17 | 0.17 | 3.7E-01 | T             | 281 | 1.01 | 0.18 | 9.6E-01 |
| rs3978768 | SCD      | 10  | 102111569 | G   | 389 | 0.97 | 0.16 | 8.7E-01 | G                        | 291 | 1.05 | 0.19 | 7.9E-01 | G             | 276 | 0.92 | 0.20 | 6.7E-01 |
| rs3985938 | CYP2D6   | 22  | 40841673  | T   | 393 | 0.76 | 0.17 | 1.0E-01 | T                        | 291 | 0.57 | 0.22 | 1.0E-02 | T             | 281 | 0.93 | 0.20 | 7.4E-01 |
| rs401643  | TRPV3    | 17  | 3386204   | C   | 394 | 0.85 | 0.19 | 4.0E-01 | C                        | 292 | 0.89 | 0.23 | 6.2E-01 | C             | 281 | 0.78 | 0.24 | 3.0E-01 |
| rs402280  | GRIK1    | 21  | 30129589  | T   | 394 | 1.49 | 0.15 | 8.5E-03 | T                        | 292 | 1.45 | 0.18 | 3.7E-02 | T             | 281 | 1.62 | 0.19 | 1.2E-02 |

| SNP       | GENE     | CHR | BP        | TMD |     |      |      |         | TMD with widespread pain |     |      |      |         | Localized TMD |     |      |      |         |
|-----------|----------|-----|-----------|-----|-----|------|------|---------|--------------------------|-----|------|------|---------|---------------|-----|------|------|---------|
|           |          |     |           | A1  | N   | OR   | SE   | P       | A1                       | N   | OR   | SE   | P       | A1            | N   | OR   | SE   | P       |
| rs403636  | SLC6A3   | 5   | 1491354   | A   | 393 | 0.85 | 0.20 | 3.9E-01 | A                        | 292 | 0.80 | 0.24 | 3.6E-01 | A             | 280 | 0.83 | 0.26 | 4.7E-01 |
| rs4073    | IL8      | 4   | 74824888  | A   | 393 | 0.82 | 0.14 | 1.5E-01 | A                        | 291 | 0.74 | 0.17 | 7.9E-02 | A             | 280 | 0.90 | 0.18 | 5.5E-01 |
| rs4076478 | SCN11A   | 3   | 38970536  | G   | 394 | 1.05 | 0.21 | 8.3E-01 | G                        | 292 | 1.16 | 0.25 | 5.5E-01 | G             | 281 | 0.99 | 0.27 | 9.7E-01 |
| rs4077374 | GRIA1    | 5   | 153039078 | C   | 394 | 1.43 | 0.15 | 1.5E-02 | C                        | 292 | 1.49 | 0.18 | 2.3E-02 | C             | 281 | 1.39 | 0.19 | 7.8E-02 |
| rs4077810 | ITGAM    | 16  | 31248410  | T   | 394 | 1.09 | 0.16 | 5.8E-01 | T                        | 292 | 1.12 | 0.19 | 5.6E-01 | T             | 281 | 1.06 | 0.20 | 7.8E-01 |
| rs4078135 | TAAR2    | 6   | 132972435 | T   | 393 | 1.05 | 0.15 | 7.3E-01 | T                        | 291 | 1.00 | 0.19 | 9.9E-01 | T             | 280 | 1.10 | 0.19 | 6.2E-01 |
| rs4086116 | CYP2C9   | 10  | 96697192  | T   | 394 | 1.02 | 0.18 | 9.3E-01 | T                        | 292 | 0.85 | 0.23 | 4.9E-01 | T             | 281 | 1.18 | 0.23 | 4.5E-01 |
| rs412227  | LIPM     | 10  | 90480901  | A   | 394 | 0.93 | 0.17 | 6.6E-01 | A                        | 292 | 1.05 | 0.21 | 8.1E-01 | A             | 281 | 0.89 | 0.22 | 6.0E-01 |
| rs4128572 | GRIA1    | 5   | 153108908 | A   | 394 | 1.09 | 0.14 | 5.3E-01 | A                        | 292 | 1.09 | 0.17 | 6.3E-01 | A             | 281 | 1.11 | 0.18 | 5.6E-01 |
| rs4131162 | SCN9A    | 2   | 166876710 | A   | 394 | 0.98 | 0.15 | 8.8E-01 | A                        | 292 | 0.95 | 0.18 | 7.6E-01 | A             | 281 | 0.96 | 0.19 | 8.2E-01 |
| rs4131610 | ERBB4    | 2   | 212073855 | A   | 394 | 0.92 | 0.16 | 5.8E-01 | A                        | 292 | 0.84 | 0.20 | 3.8E-01 | A             | 281 | 1.07 | 0.20 | 7.3E-01 |
| rs4132006 | EPHB3    | 3   | 185764350 | A   | 394 | 0.94 | 0.15 | 6.6E-01 | A                        | 292 | 0.92 | 0.18 | 6.4E-01 | A             | 281 | 1.00 | 0.19 | 1.0E+00 |
| rs4133101 | PTGER4   | 5   | 40715324  | T   | 392 | 0.87 | 0.15 | 3.7E-01 | T                        | 290 | 0.90 | 0.18 | 5.6E-01 | T             | 280 | 0.87 | 0.19 | 4.5E-01 |
| rs4133368 | SCN11A   | 3   | 38886976  | T   | 394 | 1.04 | 0.20 | 8.4E-01 | T                        | 292 | 1.26 | 0.24 | 3.4E-01 | T             | 281 | 0.91 | 0.26 | 7.1E-01 |
| rs4142900 | HTR2A    | 13  | 46371551  | T   | 394 | 1.08 | 0.14 | 6.1E-01 | T                        | 292 | 0.93 | 0.18 | 6.8E-01 | T             | 281 | 1.16 | 0.18 | 4.0E-01 |
| rs4144146 | TAAR5    | 6   | 132958086 | A   | 394 | 0.86 | 0.28 | 5.8E-01 | A                        | 292 | 0.96 | 0.33 | 9.0E-01 | A             | 281 | 0.72 | 0.37 | 3.7E-01 |
| rs4145160 | GRIA1    | 5   | 152854742 | A   | 394 | 1.06 | 0.23 | 8.1E-01 | A                        | 292 | 1.04 | 0.29 | 9.0E-01 | A             | 281 | 1.16 | 0.29 | 6.0E-01 |
| rs4146770 | P2RY13   | 3   | 152531234 | C   | 394 | 1.27 | 0.17 | 1.7E-01 | C                        | 292 | 1.16 | 0.21 | 5.0E-01 | C             | 281 | 1.40 | 0.21 | 1.2E-01 |
| rs4148727 | ABCB1    | 7   | 87180702  | G   | 394 | 0.87 | 0.53 | 7.9E-01 | G                        | 292 | 1.03 | 0.64 | 9.6E-01 | G             | 281 | 0.86 | 0.70 | 8.3E-01 |
| rs41505   | ETV1     | 7   | 13996644  | G   | 382 | 1.34 | 0.13 | 2.9E-02 | G                        | 284 | 1.63 | 0.16 | 2.0E-03 | G             | 272 | 1.17 | 0.18 | 3.8E-01 |
| rs4151117 | CX3CL1   | 16  | 55974635  | G   | 393 | 1.13 | 0.17 | 4.7E-01 | G                        | 291 | 0.90 | 0.21 | 6.1E-01 | G             | 281 | 1.30 | 0.20 | 2.0E-01 |
| rs415996  | LIPM     | 10  | 90477699  | T   | 381 | 0.79 | 0.16 | 1.3E-01 | T                        | 284 | 0.72 | 0.19 | 9.4E-02 | T             | 273 | 0.86 | 0.19 | 4.5E-01 |
| rs418210  | GABRG2   | 5   | 161513561 | T   | 393 | 1.33 | 0.16 | 7.4E-02 | T                        | 291 | 1.25 | 0.19 | 2.4E-01 | T             | 281 | 1.36 | 0.20 | 1.1E-01 |
| rs419598  | IL1RN    | 2   | 113603678 | C   | 394 | 0.99 | 0.15 | 9.4E-01 | C                        | 292 | 0.97 | 0.18 | 8.6E-01 | C             | 281 | 1.03 | 0.20 | 8.9E-01 |
| rs420121  | GRIK1    | 21  | 30068479  | A   | 394 | 0.91 | 0.15 | 5.4E-01 | A                        | 292 | 0.82 | 0.19 | 3.1E-01 | A             | 281 | 1.07 | 0.19 | 7.3E-01 |
| rs42051   | CACNA2D1 | 7   | 81795481  | T   | 393 | 0.94 | 0.15 | 6.8E-01 | T                        | 291 | 0.89 | 0.18 | 5.1E-01 | T             | 280 | 0.97 | 0.18 | 8.9E-01 |
| rs4233895 | NTSR2    | 2   | 11723196  | T   | 394 | 1.00 | 0.44 | 1.0E+00 | T                        | 292 | 0.80 | 0.61 | 7.1E-01 | T             | 281 | 1.62 | 0.52 | 3.5E-01 |
| rs4234955 | NPY1R    | 4   | 164479726 | G   | 394 | 0.97 | 0.15 | 8.2E-01 | G                        | 292 | 0.86 | 0.19 | 4.3E-01 | G             | 281 | 1.12 | 0.19 | 5.6E-01 |
| rs4240793 | AIM      | 16  | 85946457  | C   | 394 | 0.97 | 0.14 | 8.3E-01 | C                        | 292 | 1.03 | 0.17 | 8.6E-01 | C             | 281 | 0.97 | 0.18 | 8.5E-01 |
| rs4241539 | RAB5A    | 3   | 19978615  | G   | 392 | 1.03 | 0.17 | 8.6E-01 | G                        | 290 | 1.01 | 0.22 | 9.8E-01 | G             | 280 | 1.09 | 0.21 | 7.0E-01 |
| rs42460   | SLC6A2   | 16  | 54295157  | G   | 394 | 1.10 | 0.25 | 7.1E-01 | G                        | 292 | 0.96 | 0.31 | 8.9E-01 | G             | 281 | 1.22 | 0.30 | 5.1E-01 |
| rs4252041 | IL1RN    | 2   | 113607081 | T   | 394 | 1.08 | 0.39 | 8.5E-01 | T                        | 292 | 0.97 | 0.49 | 9.5E-01 | T             | 281 | 1.27 | 0.47 | 6.1E-01 |
| rs4253239 | KLKB1    | 4   | 187385469 | T   | 394 | 1.02 | 0.18 | 9.3E-01 | T                        | 292 | 0.89 | 0.22 | 6.1E-01 | T             | 281 | 1.08 | 0.22 | 7.3E-01 |
| rs4253252 | KLKB1    | 4   | 187394452 | T   | 394 | 0.78 | 0.14 | 7.8E-02 | T                        | 292 | 0.78 | 0.17 | 1.5E-01 | T             | 281 | 0.79 | 0.18 | 1.9E-01 |
| rs4253301 | KLKB1    | 4   | 187410006 | G   | 394 | 0.72 | 0.22 | 1.3E-01 | G                        | 292 | 0.71 | 0.28 | 2.2E-01 | G             | 281 | 0.76 | 0.28 | 3.4E-01 |
| rs4253325 | KLKB1    | 4   | 187415467 | A   | 394 | 0.87 | 0.24 | 5.5E-01 | A                        | 292 | 1.00 | 0.29 | 1.0E+00 | A             | 281 | 0.84 | 0.31 | 5.7E-01 |
| rs4265380 | RUNX3    | 1   | 25165943  | C   | 393 | 1.06 | 0.14 | 6.8E-01 | C                        | 291 | 0.87 | 0.17 | 4.0E-01 | C             | 280 | 1.27 | 0.18 | 1.8E-01 |
| rs4265409 | AIM      | 1   | 161681183 | T   | 394 | 1.11 | 0.14 | 4.8E-01 | T                        | 292 | 1.06 | 0.17 | 7.5E-01 | T             | 281 | 1.18 | 0.18 | 3.7E-01 |
| rs4274224 | DRD2     | 11  | 112824662 | G   | 394 | 1.07 | 0.15 | 6.6E-01 | G                        | 292 | 1.03 | 0.18 | 8.8E-01 | G             | 281 | 1.12 | 0.18 | 5.4E-01 |

| SNP       | GENE      | CHR | BP        | TMD |     |      |      |         | TMD with widespread pain |     |      |      |         | Localized TMD |     |      |      |         |
|-----------|-----------|-----|-----------|-----|-----|------|------|---------|--------------------------|-----|------|------|---------|---------------|-----|------|------|---------|
|           |           |     |           | A1  | N   | OR   | SE   | P       | A1                       | N   | OR   | SE   | P       | A1            | N   | OR   | SE   | P       |
| rs4281084 | NRG1      | 8   | 31614916  | A   | 394 | 1.05 | 0.17 | 8.0E-01 | A                        | 292 | 1.03 | 0.21 | 9.1E-01 | A             | 281 | 0.97 | 0.21 | 8.8E-01 |
| rs4289044 | ACCN1     | 17  | 28446652  | G   | 394 | 0.89 | 0.18 | 5.3E-01 | G                        | 292 | 0.92 | 0.21 | 7.1E-01 | G             | 281 | 0.81 | 0.23 | 3.7E-01 |
| rs4297845 | GAD1      | 2   | 171427785 | A   | 394 | 1.14 | 0.14 | 3.3E-01 | A                        | 292 | 1.11 | 0.17 | 5.4E-01 | A             | 281 | 1.27 | 0.17 | 1.7E-01 |
| rs4299782 | GRIA1     | 5   | 153059126 | C   | 394 | 1.10 | 0.22 | 6.6E-01 | C                        | 292 | 1.23 | 0.26 | 4.3E-01 | C             | 281 | 0.91 | 0.28 | 7.4E-01 |
| rs4301502 | ANXA1     | 9   | 74958003  | A   | 394 | 1.45 | 0.31 | 2.3E-01 | A                        | 292 | 1.27 | 0.38 | 5.3E-01 | A             | 281 | 1.85 | 0.37 | 9.3E-02 |
| rs4302506 | GRIA2     | 4   | 158458280 | T   | 394 | 1.11 | 0.15 | 4.9E-01 | T                        | 292 | 1.16 | 0.19 | 4.3E-01 | T             | 281 | 1.09 | 0.20 | 6.8E-01 |
| rs4304105 | GABRB2    | 5   | 160834408 | T   | 394 | 1.00 | 0.21 | 1.0E+00 | T                        | 292 | 0.86 | 0.26 | 5.6E-01 | T             | 281 | 1.19 | 0.26 | 5.1E-01 |
| rs430517  | LIPM      | 10  | 90514217  | C   | 394 | 0.93 | 0.17 | 6.7E-01 | C                        | 292 | 1.03 | 0.21 | 8.7E-01 | C             | 281 | 0.90 | 0.22 | 6.5E-01 |
| rs4309    | ACE       | 17  | 58913655  | T   | 390 | 0.69 | 0.15 | 1.0E-02 | T                        | 290 | 0.68 | 0.18 | 2.9E-02 | T             | 277 | 0.73 | 0.19 | 9.2E-02 |
| rs4315640 | SCN11A    | 3   | 38898704  | A   | 394 | 1.07 | 0.21 | 7.5E-01 | A                        | 292 | 1.17 | 0.24 | 5.2E-01 | A             | 281 | 0.88 | 0.29 | 6.7E-01 |
| rs4316    | ACE       | 17  | 58916041  | T   | 391 | 0.68 | 0.15 | 9.1E-03 | T                        | 289 | 0.69 | 0.18 | 3.7E-02 | T             | 280 | 0.70 | 0.19 | 5.6E-02 |
| rs4320778 | NGF       | 1   | 115676454 | A   | 394 | 0.98 | 0.20 | 9.2E-01 | A                        | 292 | 1.16 | 0.24 | 5.3E-01 | A             | 281 | 0.81 | 0.26 | 4.3E-01 |
| rs4322502 | GABARAPL1 | 12  | 10256612  | T   | 393 | 0.90 | 0.27 | 7.0E-01 | T                        | 291 | 1.18 | 0.31 | 5.9E-01 | T             | 281 | 0.64 | 0.39 | 2.6E-01 |
| rs4326886 | GABARAPL1 | 12  | 10259153  | T   | 394 | 0.83 | 0.28 | 4.9E-01 | T                        | 292 | 1.03 | 0.32 | 9.2E-01 | T             | 281 | 0.64 | 0.39 | 2.6E-01 |
| rs4329829 | PRKD1     | 14  | 29356933  | T   | 394 | 0.95 | 0.16 | 7.4E-01 | T                        | 292 | 0.92 | 0.20 | 6.8E-01 | T             | 281 | 1.06 | 0.21 | 7.9E-01 |
| rs4336803 | PLA2G4A   | 1   | 185161025 | T   | 394 | 0.93 | 0.19 | 7.0E-01 | T                        | 292 | 1.19 | 0.22 | 4.3E-01 | T             | 281 | 0.72 | 0.26 | 2.1E-01 |
| rs4337623 | GRK7      | 3   | 143008847 | T   | 394 | 1.12 | 0.14 | 4.1E-01 | T                        | 292 | 1.04 | 0.17 | 8.0E-01 | T             | 281 | 1.13 | 0.17 | 4.9E-01 |
| rs4343    | ACE       | 17  | 58919763  | A   | 391 | 0.71 | 0.14 | 1.9E-02 | A                        | 290 | 0.72 | 0.18 | 5.9E-02 | A             | 279 | 0.73 | 0.19 | 8.6E-02 |
| rs435021  | CAMK4     | 5   | 110678864 | G   | 394 | 0.91 | 0.14 | 5.2E-01 | G                        | 292 | 1.09 | 0.17 | 6.3E-01 | G             | 281 | 0.77 | 0.18 | 1.5E-01 |
| rs4356975 | UGT2B7    | 4   | 70007052  | T   | 393 | 0.90 | 0.15 | 4.7E-01 | T                        | 291 | 0.87 | 0.19 | 4.5E-01 | T             | 280 | 0.96 | 0.19 | 8.4E-01 |
| rs4362    | ACE       | 17  | 58927493  | C   | 394 | 0.73 | 0.14 | 2.9E-02 | C                        | 292 | 0.71 | 0.17 | 5.5E-02 | C             | 281 | 0.77 | 0.18 | 1.6E-01 |
| rs4371451 | SCN11A    | 3   | 38881041  | C   | 394 | 1.19 | 0.17 | 3.1E-01 | C                        | 292 | 1.22 | 0.20 | 3.2E-01 | C             | 281 | 1.16 | 0.22 | 5.1E-01 |
| rs4375232 | KCNK2     | 1   | 213337026 | A   | 394 | 1.18 | 0.17 | 3.2E-01 | A                        | 292 | 1.46 | 0.20 | 5.7E-02 | A             | 281 | 0.98 | 0.22 | 9.3E-01 |
| rs4375236 | KCNK2     | 1   | 213445983 | T   | 394 | 0.76 | 0.19 | 1.4E-01 | T                        | 292 | 0.90 | 0.22 | 6.4E-01 | T             | 281 | 0.61 | 0.25 | 5.0E-02 |
| rs4380767 | TAAR2     | 6   | 132988415 | T   | 393 | 0.81 | 0.15 | 1.8E-01 | T                        | 291 | 1.04 | 0.18 | 8.3E-01 | T             | 280 | 0.58 | 0.20 | 7.5E-03 |
| rs4385264 | GRIA1     | 5   | 153033928 | A   | 392 | 1.35 | 0.14 | 3.1E-02 | A                        | 290 | 1.41 | 0.17 | 3.8E-02 | A             | 279 | 1.29 | 0.18 | 1.5E-01 |
| rs4392549 | GRIA2     | 4   | 158483032 | G   | 393 | 1.29 | 0.42 | 5.4E-01 | G                        | 291 | 1.70 | 0.46 | 2.4E-01 | G             | 280 | 0.72 | 0.60 | 5.8E-01 |
| rs4398451 | RAB5A     | 3   | 19985890  | C   | 394 | 1.15 | 0.15 | 3.4E-01 | C                        | 292 | 1.18 | 0.18 | 3.7E-01 | C             | 281 | 1.20 | 0.19 | 3.3E-01 |
| rs4399422 | EFNB2     | 13  | 105944511 | A   | 394 | 0.88 | 0.15 | 3.8E-01 | A                        | 292 | 0.95 | 0.18 | 7.8E-01 | A             | 281 | 0.80 | 0.18 | 2.2E-01 |
| rs440666  | APP       | 21  | 26250046  | T   | 394 | 1.16 | 0.16 | 3.4E-01 | T                        | 292 | 1.17 | 0.19 | 4.2E-01 | T             | 281 | 1.07 | 0.20 | 7.3E-01 |
| rs4407290 | XDH       | 2   | 31460174  | A   | 391 | 0.91 | 0.41 | 8.3E-01 | A                        | 290 | 1.05 | 0.49 | 9.3E-01 | A             | 278 | 0.83 | 0.55 | 7.4E-01 |
| rs4411417 | GCH1      | 14  | 54390313  | C   | 394 | 0.94 | 0.17 | 7.3E-01 | C                        | 292 | 0.94 | 0.21 | 7.8E-01 | C             | 281 | 0.93 | 0.21 | 7.2E-01 |
| rs4412435 | NTRK2     | 9   | 86775317  | C   | 394 | 1.04 | 0.14 | 7.8E-01 | C                        | 292 | 0.96 | 0.17 | 7.9E-01 | C             | 281 | 1.08 | 0.18 | 6.8E-01 |
| rs4419163 | NALP12    | 19  | 59019380  | A   | 392 | 1.05 | 0.18 | 7.8E-01 | A                        | 290 | 1.07 | 0.21 | 7.7E-01 | A             | 279 | 1.02 | 0.23 | 9.4E-01 |
| rs4424825 | PRKD1     | 14  | 29362069  | C   | 394 | 0.95 | 0.16 | 7.4E-01 | C                        | 292 | 0.92 | 0.20 | 6.8E-01 | C             | 281 | 1.06 | 0.21 | 7.9E-01 |
| rs4432799 | GLRB      | 4   | 158226687 | G   | 393 | 1.19 | 0.18 | 3.4E-01 | G                        | 291 | 1.39 | 0.21 | 1.2E-01 | G             | 280 | 1.01 | 0.24 | 9.8E-01 |
| rs4439987 | TACR1     | 2   | 75140614  | G   | 394 | 1.24 | 0.15 | 1.5E-01 | G                        | 292 | 1.24 | 0.18 | 2.3E-01 | G             | 281 | 1.23 | 0.18 | 2.5E-01 |
| rs4446102 | PRKCE     | 2   | 45851371  | C   | 394 | 0.99 | 0.15 | 9.4E-01 | C                        | 292 | 1.01 | 0.19 | 9.4E-01 | C             | 281 | 0.92 | 0.19 | 6.7E-01 |
| rs4453447 | GABRB3    | 15  | 24554565  | C   | 394 | 0.87 | 0.20 | 4.8E-01 | C                        | 292 | 1.22 | 0.23 | 3.9E-01 | C             | 281 | 0.57 | 0.30 | 5.6E-02 |

| SNP       | GENE   | CHR | BP        | TMD |     |      |      |         | TMD with widespread pain |     |      |      |         | Localized TMD |     |      |      |         |
|-----------|--------|-----|-----------|-----|-----|------|------|---------|--------------------------|-----|------|------|---------|---------------|-----|------|------|---------|
|           |        |     |           | A1  | N   | OR   | SE   | P       | A1                       | N   | OR   | SE   | P       | A1            | N   | OR   | SE   | P       |
| rs4453709 | SCN9A  | 2   | 166834700 | T   | 394 | 0.91 | 0.14 | 5.2E-01 | T                        | 292 | 0.94 | 0.18 | 7.2E-01 | T             | 281 | 0.86 | 0.18 | 4.2E-01 |
| rs4459609 | ACE    | 17  | 58902680  | C   | 394 | 1.09 | 0.15 | 5.5E-01 | C                        | 292 | 1.00 | 0.18 | 1.0E+00 | C             | 281 | 1.16 | 0.19 | 4.3E-01 |
| rs4459610 | ACE    | 17  | 58938452  | A   | 394 | 0.99 | 0.15 | 9.4E-01 | A                        | 292 | 0.88 | 0.18 | 4.9E-01 | A             | 281 | 1.16 | 0.19 | 4.3E-01 |
| rs4461142 | ACE    | 17  | 58931780  | T   | 394 | 1.15 | 0.15 | 3.4E-01 | T                        | 292 | 1.16 | 0.18 | 4.3E-01 | T             | 281 | 1.19 | 0.19 | 3.5E-01 |
| rs4462317 | RBMXL2 | 11  | 7069761   | C   | 393 | 0.90 | 0.22 | 6.4E-01 | C                        | 291 | 0.93 | 0.26 | 7.9E-01 | C             | 280 | 0.82 | 0.28 | 4.8E-01 |
| rs4474484 | TPH2   | 12  | 70701713  | A   | 393 | 0.89 | 0.14 | 4.3E-01 | A                        | 291 | 0.78 | 0.18 | 1.8E-01 | A             | 281 | 1.08 | 0.18 | 6.6E-01 |
| rs4475186 | GRIA2  | 4   | 158461990 | G   | 394 | 1.10 | 0.15 | 5.4E-01 | G                        | 292 | 1.15 | 0.19 | 4.7E-01 | G             | 281 | 1.07 | 0.20 | 7.2E-01 |
| rs4475425 | CHRM2  | 7   | 136225739 | A   | 394 | 0.72 | 0.16 | 3.2E-02 | A                        | 292 | 0.69 | 0.19 | 5.6E-02 | A             | 281 | 0.75 | 0.20 | 1.4E-01 |
| rs4484738 | AIM    | 8   | 121772608 | G   | 393 | 0.70 | 0.16 | 2.8E-02 | G                        | 291 | 0.73 | 0.20 | 1.1E-01 | G             | 280 | 0.75 | 0.21 | 1.5E-01 |
| rs4490786 | DDC    | 7   | 50511808  | T   | 394 | 0.93 | 0.19 | 7.0E-01 | T                        | 292 | 1.05 | 0.22 | 8.4E-01 | T             | 281 | 0.79 | 0.25 | 3.6E-01 |
| rs4502882 | GRIA1  | 5   | 153074191 | C   | 393 | 0.83 | 0.15 | 2.2E-01 | C                        | 291 | 0.77 | 0.18 | 1.5E-01 | C             | 280 | 0.89 | 0.19 | 5.2E-01 |
| rs4504116 | SCN11A | 3   | 38928772  | A   | 394 | 1.05 | 0.15 | 7.6E-01 | A                        | 292 | 1.16 | 0.19 | 4.1E-01 | A             | 281 | 1.02 | 0.20 | 9.3E-01 |
| rs4511483 | AIM    | 15  | 69925644  | A   | 394 | 1.03 | 0.17 | 8.7E-01 | A                        | 292 | 0.99 | 0.21 | 9.8E-01 | A             | 281 | 1.06 | 0.21 | 7.8E-01 |
| rs4514993 | SCN11A | 3   | 38921876  | A   | 394 | 1.23 | 0.23 | 3.6E-01 | A                        | 292 | 1.16 | 0.28 | 5.9E-01 | A             | 281 | 1.41 | 0.28 | 2.3E-01 |
| rs4519549 | TACR1  | 2   | 75237308  | T   | 390 | 1.19 | 0.15 | 2.4E-01 | T                        | 291 | 1.19 | 0.17 | 3.1E-01 | T             | 278 | 1.18 | 0.18 | 3.7E-01 |
| rs4522461 | ARRB2  | 17  | 4568522   | T   | 394 | 0.96 | 0.17 | 8.0E-01 | T                        | 292 | 1.00 | 0.21 | 9.9E-01 | T             | 281 | 0.87 | 0.22 | 5.2E-01 |
| rs4526269 | CAMK2B | 7   | 44262832  | T   | 385 | 1.24 | 0.15 | 1.5E-01 | T                        | 285 | 1.08 | 0.19 | 7.0E-01 | T             | 274 | 1.51 | 0.19 | 2.8E-02 |
| rs4530817 | GRIA1  | 5   | 153055297 | G   | 394 | 1.31 | 0.15 | 7.0E-02 | G                        | 292 | 1.30 | 0.18 | 1.5E-01 | G             | 281 | 1.37 | 0.19 | 1.0E-01 |
| rs4539107 | KCNK2  | 1   | 213457202 | T   | 394 | 0.85 | 0.19 | 3.9E-01 | T                        | 292 | 1.01 | 0.23 | 9.8E-01 | T             | 281 | 0.71 | 0.25 | 1.7E-01 |
| rs4541346 | SCN11A | 3   | 38868494  | G   | 394 | 0.92 | 0.17 | 6.1E-01 | G                        | 292 | 1.01 | 0.21 | 9.5E-01 | G             | 281 | 0.89 | 0.22 | 6.0E-01 |
| rs4551188 | GRM1   | 6   | 146529860 | G   | 394 | 1.03 | 0.24 | 9.1E-01 | G                        | 292 | 0.99 | 0.28 | 9.8E-01 | G             | 281 | 1.01 | 0.30 | 9.7E-01 |
| rs4552421 | NPY1R  | 4   | 164465113 | A   | 393 | 1.12 | 0.23 | 6.3E-01 | A                        | 291 | 1.08 | 0.27 | 7.7E-01 | A             | 281 | 1.16 | 0.29 | 6.0E-01 |
| rs4565713 | NGF    | 1   | 115671022 | G   | 394 | 1.06 | 0.16 | 7.0E-01 | G                        | 292 | 1.06 | 0.19 | 7.5E-01 | G             | 281 | 1.06 | 0.20 | 7.8E-01 |
| rs4570308 | MAOA   | 23  | 43396441  | G   | 394 | 1.09 | 0.15 | 5.9E-01 | G                        | 292 | 1.14 | 0.18 | 4.7E-01 | G             | 281 | 0.98 | 0.19 | 9.1E-01 |
| rs4570625 | TPH2   | 12  | 70618190  | T   | 394 | 0.99 | 0.16 | 9.3E-01 | T                        | 292 | 1.09 | 0.19 | 6.7E-01 | T             | 281 | 0.93 | 0.21 | 7.2E-01 |
| rs457474  | GRIK1  | 21  | 30203356  | C   | 394 | 0.83 | 0.21 | 3.6E-01 | C                        | 292 | 0.65 | 0.27 | 1.2E-01 | C             | 281 | 0.99 | 0.25 | 9.8E-01 |
| rs4581480 | DRD2   | 11  | 112829684 | C   | 394 | 1.41 | 0.23 | 1.4E-01 | C                        | 292 | 1.26 | 0.28 | 4.1E-01 | C             | 281 | 1.68 | 0.28 | 6.3E-02 |
| rs4586    | CCL2   | 17  | 29607382  | C   | 394 | 0.90 | 0.15 | 5.0E-01 | C                        | 292 | 0.83 | 0.19 | 3.1E-01 | C             | 281 | 1.04 | 0.19 | 8.2E-01 |
| rs4586205 | DRD2   | 11  | 112812339 | G   | 394 | 1.31 | 0.17 | 1.0E-01 | G                        | 292 | 1.26 | 0.20 | 2.4E-01 | G             | 281 | 1.42 | 0.21 | 1.0E-01 |
| rs4591574 | GABRB1 | 4   | 47118352  | C   | 393 | 0.92 | 0.14 | 5.7E-01 | C                        | 291 | 1.02 | 0.17 | 9.2E-01 | C             | 280 | 0.80 | 0.18 | 2.2E-01 |
| rs4608351 | ITGAM  | 16  | 31256349  | T   | 394 | 1.08 | 0.16 | 6.4E-01 | T                        | 292 | 1.12 | 0.19 | 5.6E-01 | T             | 281 | 1.03 | 0.20 | 8.9E-01 |
| rs4610240 | RAB5A  | 3   | 19960959  | C   | 392 | 1.07 | 0.18 | 7.0E-01 | C                        | 290 | 0.97 | 0.22 | 8.9E-01 | C             | 279 | 1.11 | 0.22 | 6.5E-01 |
| rs4611457 | ADCY7  | 16  | 48853495  | G   | 393 | 0.82 | 0.15 | 1.9E-01 | G                        | 291 | 0.81 | 0.18 | 2.5E-01 | G             | 280 | 0.80 | 0.19 | 2.4E-01 |
| rs4618360 | GLRB   | 4   | 158259160 | C   | 394 | 1.25 | 0.15 | 1.5E-01 | C                        | 292 | 1.48 | 0.19 | 3.4E-02 | C             | 281 | 1.03 | 0.19 | 8.9E-01 |
| rs462393  | GRIK1  | 21  | 30190441  | A   | 394 | 0.84 | 0.21 | 4.1E-01 | A                        | 292 | 0.69 | 0.27 | 1.6E-01 | A             | 281 | 0.99 | 0.25 | 9.8E-01 |
| rs4628972 | GRIN2A | 16  | 9934617   | G   | 393 | 1.37 | 0.15 | 3.3E-02 | G                        | 291 | 1.41 | 0.18 | 6.3E-02 | G             | 280 | 1.26 | 0.18 | 2.1E-01 |
| rs4632359 | SCN9A  | 2   | 166863434 | T   | 394 | 0.96 | 0.15 | 7.7E-01 | T                        | 292 | 1.18 | 0.18 | 3.4E-01 | T             | 281 | 0.78 | 0.19 | 1.9E-01 |
| rs4632602 | NPY5R  | 4   | 164486579 | C   | 394 | 1.12 | 0.22 | 5.9E-01 | C                        | 292 | 1.06 | 0.27 | 8.2E-01 | C             | 281 | 1.33 | 0.27 | 2.9E-01 |
| rs4633    | COMT   | 22  | 18330235  | C   | 391 | 1.24 | 0.14 | 1.4E-01 | C                        | 291 | 1.29 | 0.17 | 1.4E-01 | C             | 278 | 1.16 | 0.18 | 4.1E-01 |

| SNP       | GENE    | CHR | BP        | TMD |     |      |      |         | TMD with widespread pain |     |      |      |         | Localized TMD |     |      |      |         |
|-----------|---------|-----|-----------|-----|-----|------|------|---------|--------------------------|-----|------|------|---------|---------------|-----|------|------|---------|
|           |         |     |           | A1  | N   | OR   | SE   | P       | A1                       | N   | OR   | SE   | P       | A1            | N   | OR   | SE   | P       |
| rs463379  | SLC6A3  | 5   | 1484164   | C   | 394 | 0.97 | 0.17 | 8.6E-01 | C                        | 292 | 0.96 | 0.22 | 8.5E-01 | C             | 281 | 1.00 | 0.22 | 9.9E-01 |
| rs4633936 | SCN9A   | 2   | 166822043 | C   | 394 | 1.43 | 0.21 | 8.5E-02 | C                        | 292 | 1.46 | 0.25 | 1.2E-01 | C             | 281 | 1.38 | 0.26 | 2.0E-01 |
| rs463479  | GRIK1   | 21  | 30189918  | C   | 394 | 0.84 | 0.21 | 4.1E-01 | C                        | 292 | 0.65 | 0.27 | 1.2E-01 | C             | 281 | 1.03 | 0.25 | 8.9E-01 |
| rs464028  | GRIK1   | 21  | 30118487  | C   | 393 | 0.76 | 0.22 | 2.0E-01 | C                        | 291 | 0.77 | 0.27 | 3.2E-01 | C             | 281 | 0.70 | 0.28 | 2.0E-01 |
| rs464049  | SLC6A3  | 5   | 1476905   | G   | 380 | 1.09 | 0.14 | 5.5E-01 | G                        | 281 | 1.16 | 0.17 | 4.0E-01 | G             | 269 | 1.02 | 0.18 | 9.0E-01 |
| rs4647018 | JUN     | 1   | 59019169  | C   | 394 | 2.08 | 0.47 | 1.2E-01 | C                        | 292 | 2.45 | 0.52 | 8.5E-02 | C             | 281 | 1.47 | 0.60 | 5.2E-01 |
| rs4648318 | DRD2    | 11  | 112818599 | C   | 394 | 1.37 | 0.17 | 5.9E-02 | C                        | 292 | 1.29 | 0.20 | 2.1E-01 | C             | 281 | 1.53 | 0.21 | 4.6E-02 |
| rs4650708 | PLA2G4A | 1   | 185176740 | C   | 394 | 0.79 | 0.16 | 1.5E-01 | C                        | 292 | 0.71 | 0.20 | 8.4E-02 | C             | 281 | 0.85 | 0.20 | 4.3E-01 |
| rs4653130 | AIM     | 1   | 35576728  | C   | 394 | 0.42 | 0.41 | 3.8E-02 | C                        | 292 | 0.42 | 0.52 | 9.6E-02 | C             | 281 | 0.38 | 0.56 | 8.4E-02 |
| rs4654814 | EPHB2   | 1   | 22967008  | T   | 394 | 1.20 | 0.16 | 2.6E-01 | T                        | 292 | 0.96 | 0.20 | 8.5E-01 | T             | 281 | 1.53 | 0.20 | 3.3E-02 |
| rs4654821 | EPHB2   | 1   | 23032859  | T   | 390 | 0.82 | 0.16 | 2.1E-01 | T                        | 288 | 0.84 | 0.19 | 3.8E-01 | T             | 279 | 0.79 | 0.20 | 2.2E-01 |
| rs4654824 | EPHB2   | 1   | 23055717  | T   | 394 | 0.83 | 0.16 | 2.4E-01 | T                        | 292 | 0.75 | 0.20 | 1.5E-01 | T             | 281 | 0.97 | 0.19 | 8.6E-01 |
| rs4655130 | EPHB2   | 1   | 23048581  | G   | 393 | 0.75 | 0.16 | 6.7E-02 | G                        | 292 | 0.79 | 0.19 | 2.3E-01 | G             | 280 | 0.68 | 0.20 | 5.6E-02 |
| rs4656093 | GBP2    | 1   | 89344563  | C   | 394 | 1.01 | 0.15 | 9.4E-01 | C                        | 292 | 0.87 | 0.18 | 4.6E-01 | C             | 281 | 1.09 | 0.19 | 6.5E-01 |
| rs4656095 | GBP2    | 1   | 89351396  | C   | 394 | 1.02 | 0.15 | 8.8E-01 | C                        | 292 | 0.87 | 0.18 | 4.6E-01 | C             | 281 | 1.11 | 0.19 | 5.6E-01 |
| rs466093  | GRIK1   | 21  | 30188911  | A   | 394 | 1.00 | 0.35 | 1.0E+00 | A                        | 292 | 1.31 | 0.40 | 5.0E-01 | A             | 281 | 0.69 | 0.49 | 4.6E-01 |
| rs466448  | APP     | 21  | 26465979  | G   | 394 | 0.85 | 0.14 | 2.5E-01 | G                        | 292 | 0.95 | 0.18 | 7.6E-01 | G             | 281 | 0.75 | 0.18 | 1.3E-01 |
| rs466612  | GRIK1   | 21  | 30186260  | T   | 394 | 1.12 | 0.33 | 7.4E-01 | T                        | 292 | 1.40 | 0.38 | 3.7E-01 | T             | 281 | 0.83 | 0.45 | 6.8E-01 |
| rs4667796 | SCN3A   | 2   | 165733663 | A   | 394 | 0.85 | 0.24 | 4.8E-01 | A                        | 292 | 1.05 | 0.27 | 8.5E-01 | A             | 281 | 0.67 | 0.34 | 2.4E-01 |
| rs466884  | GRIK1   | 21  | 30118125  | A   | 394 | 0.81 | 0.24 | 4.0E-01 | A                        | 292 | 0.79 | 0.30 | 4.4E-01 | A             | 281 | 0.85 | 0.30 | 5.8E-01 |
| rs4669765 | NTSR2   | 2   | 11726105  | G   | 393 | 0.85 | 0.15 | 2.6E-01 | G                        | 291 | 0.95 | 0.18 | 7.7E-01 | G             | 281 | 0.80 | 0.18 | 2.4E-01 |
| rs467028  | GRIK1   | 21  | 30214807  | T   | 394 | 0.83 | 0.21 | 3.6E-01 | T                        | 292 | 0.65 | 0.27 | 1.2E-01 | T             | 281 | 0.99 | 0.25 | 9.8E-01 |
| rs467407  | GRIK1   | 21  | 30054668  | G   | 394 | 0.86 | 0.16 | 3.3E-01 | G                        | 292 | 0.81 | 0.20 | 2.9E-01 | G             | 281 | 0.87 | 0.20 | 4.7E-01 |
| rs467422  | CAMK4   | 5   | 110760976 | C   | 394 | 1.19 | 0.21 | 4.0E-01 | C                        | 292 | 1.07 | 0.26 | 8.1E-01 | C             | 281 | 1.21 | 0.25 | 4.6E-01 |
| rs4679739 | MME     | 3   | 156363064 | T   | 394 | 1.03 | 0.15 | 8.2E-01 | T                        | 292 | 0.97 | 0.18 | 8.8E-01 | T             | 281 | 1.09 | 0.19 | 6.4E-01 |
| rs4683625 | GRK7    | 3   | 143013500 | G   | 394 | 0.99 | 0.15 | 9.4E-01 | G                        | 292 | 0.95 | 0.18 | 8.0E-01 | G             | 281 | 0.94 | 0.19 | 7.6E-01 |
| rs4684743 | SLC6A11 | 3   | 10893297  | A   | 392 | 0.88 | 0.16 | 4.2E-01 | A                        | 290 | 0.88 | 0.20 | 5.1E-01 | A             | 280 | 0.86 | 0.20 | 4.6E-01 |
| rs4687002 | AIM     | 3   | 190104562 | T   | 390 | 1.02 | 0.18 | 9.3E-01 | T                        | 290 | 1.03 | 0.21 | 9.0E-01 | T             | 279 | 0.94 | 0.22 | 7.9E-01 |
| rs4691394 | GRIA2   | 4   | 158468483 | A   | 394 | 1.07 | 0.21 | 7.5E-01 | A                        | 292 | 1.13 | 0.25 | 6.4E-01 | A             | 281 | 1.04 | 0.27 | 8.9E-01 |
| rs4691910 | NPY1R   | 4   | 164468998 | T   | 394 | 1.07 | 0.21 | 7.5E-01 | T                        | 292 | 1.07 | 0.26 | 8.0E-01 | T             | 281 | 1.12 | 0.27 | 6.8E-01 |
| rs4694637 | IL8     | 4   | 74831698  | G   | 394 | 0.84 | 0.14 | 2.1E-01 | G                        | 292 | 0.76 | 0.17 | 1.1E-01 | G             | 281 | 0.94 | 0.18 | 7.2E-01 |
| rs4713808 | PACSL1  | 6   | 34590993  | T   | 392 | 0.87 | 0.14 | 3.0E-01 | T                        | 290 | 0.75 | 0.17 | 9.1E-02 | T             | 280 | 1.04 | 0.18 | 8.2E-01 |
| rs4714854 | RUNX2   | 6   | 45555912  | T   | 394 | 0.96 | 0.14 | 7.7E-01 | T                        | 292 | 1.01 | 0.18 | 9.6E-01 | T             | 281 | 0.92 | 0.18 | 6.4E-01 |
| rs4719714 | IL6     | 7   | 22727238  | T   | 394 | 1.03 | 0.17 | 8.7E-01 | T                        | 292 | 0.98 | 0.20 | 9.2E-01 | T             | 281 | 1.01 | 0.21 | 9.5E-01 |
| rs472112  | ARRB1   | 11  | 74699149  | C   | 394 | 0.90 | 0.15 | 4.7E-01 | C                        | 292 | 0.84 | 0.18 | 3.1E-01 | C             | 281 | 0.95 | 0.18 | 8.0E-01 |
| rs4721415 | AIM     | 7   | 15202657  | A   | 394 | 1.38 | 0.22 | 1.4E-01 | A                        | 292 | 1.40 | 0.26 | 2.0E-01 | A             | 281 | 1.45 | 0.26 | 1.6E-01 |
| rs4728329 | AKR1B10 | 7   | 133876367 | A   | 394 | 0.82 | 0.28 | 4.8E-01 | A                        | 292 | 0.46 | 0.40 | 5.3E-02 | A             | 281 | 1.17 | 0.33 | 6.3E-01 |
| rs4732036 | AKR1B10 | 7   | 133876328 | C   | 394 | 1.32 | 0.16 | 7.6E-02 | C                        | 292 | 1.14 | 0.19 | 4.7E-01 | C             | 281 | 1.40 | 0.20 | 9.2E-02 |
| rs4732880 | ADRA1A  | 8   | 26704887  | T   | 394 | 0.96 | 0.16 | 8.1E-01 | T                        | 292 | 0.93 | 0.19 | 7.2E-01 | T             | 281 | 0.97 | 0.20 | 9.0E-01 |



| SNP       | GENE     | CHR | BP        | TMD |     |      |      |         | TMD with widespread pain |     |      |      |         | Localized TMD |     |      |      |         |
|-----------|----------|-----|-----------|-----|-----|------|------|---------|--------------------------|-----|------|------|---------|---------------|-----|------|------|---------|
|           |          |     |           | A1  | N   | OR   | SE   | P       | A1                       | N   | OR   | SE   | P       | A1            | N   | OR   | SE   | P       |
| rs4733130 | NRG1     | 8   | 32526536  | C   | 389 | 1.14 | 0.14 | 3.6E-01 | C                        | 288 | 1.00 | 0.17 | 9.8E-01 | C             | 278 | 1.26 | 0.18 | 2.1E-01 |
| rs4734497 | YWHAZ    | 8   | 102004147 | C   | 393 | 1.19 | 0.15 | 2.4E-01 | C                        | 291 | 1.40 | 0.19 | 7.5E-02 | C             | 280 | 1.05 | 0.20 | 8.2E-01 |
| rs4737761 | AIM      | 8   | 54867106  | A   | 394 | 1.15 | 0.31 | 6.5E-01 | A                        | 292 | 1.55 | 0.35 | 2.1E-01 | A             | 281 | 0.85 | 0.42 | 7.0E-01 |
| rs4738390 | STAU2    | 8   | 74719702  | G   | 394 | 1.48 | 0.45 | 3.8E-01 | G                        | 292 | 1.31 | 0.60 | 6.6E-01 | G             | 281 | 2.43 | 0.53 | 9.6E-02 |
| rs4747547 | GAD2     | 10  | 26593566  | G   | 392 | 0.92 | 0.19 | 6.5E-01 | G                        | 290 | 0.98 | 0.23 | 9.2E-01 | G             | 279 | 0.84 | 0.24 | 4.8E-01 |
| rs4749107 | GAD2     | 10  | 26612848  | G   | 394 | 0.98 | 0.16 | 8.8E-01 | G                        | 292 | 1.11 | 0.19 | 5.9E-01 | G             | 281 | 0.83 | 0.20 | 3.3E-01 |
| rs4751716 | GRK5     | 10  | 121156855 | C   | 394 | 1.11 | 0.15 | 5.0E-01 | C                        | 292 | 1.13 | 0.18 | 5.1E-01 | C             | 281 | 1.04 | 0.19 | 8.2E-01 |
| rs4752045 | SLC18A2  | 10  | 119009680 | C   | 392 | 0.93 | 0.14 | 6.3E-01 | C                        | 290 | 0.94 | 0.18 | 7.2E-01 | C             | 279 | 0.89 | 0.18 | 5.2E-01 |
| rs475717  | HTR2C    | 23  | 113721638 | G   | 393 | 0.88 | 0.19 | 5.2E-01 | G                        | 292 | 0.94 | 0.24 | 8.1E-01 | G             | 280 | 0.82 | 0.24 | 4.0E-01 |
| rs4760    | PLAUR    | 19  | 48844940  | G   | 393 | 0.94 | 0.20 | 7.4E-01 | G                        | 291 | 0.92 | 0.24 | 7.1E-01 | G             | 280 | 0.97 | 0.25 | 8.9E-01 |
| rs4760754 | TPH2     | 12  | 70675106  | T   | 394 | 0.90 | 0.14 | 4.8E-01 | T                        | 292 | 0.95 | 0.17 | 7.7E-01 | T             | 281 | 0.90 | 0.18 | 5.4E-01 |
| rs4761829 | SCN8A    | 12  | 50367232  | C   | 394 | 0.73 | 0.21 | 1.3E-01 | C                        | 292 | 0.64 | 0.27 | 9.1E-02 | C             | 281 | 0.80 | 0.25 | 3.9E-01 |
| rs4761831 | SCN8A    | 12  | 50397424  | C   | 394 | 0.77 | 0.22 | 2.4E-01 | C                        | 292 | 0.78 | 0.27 | 3.4E-01 | C             | 281 | 0.72 | 0.28 | 2.4E-01 |
| rs4762    | AGT      | 1   | 228912600 | A   | 394 | 1.00 | 0.21 | 1.0E+00 | A                        | 292 | 1.02 | 0.25 | 9.3E-01 | A             | 281 | 0.95 | 0.26 | 8.3E-01 |
| rs476632  | HSP90AB1 | 6   | 44322303  | T   | 385 | 0.90 | 0.15 | 4.6E-01 | T                        | 286 | 0.94 | 0.19 | 7.4E-01 | T             | 275 | 0.80 | 0.19 | 2.5E-01 |
| rs4776783 | MAP2K1   | 15  | 64449161  | G   | 390 | 1.49 | 0.21 | 6.0E-02 | G                        | 289 | 1.32 | 0.26 | 2.9E-01 | G             | 277 | 1.89 | 0.25 | 1.2E-02 |
| rs4780784 | GRIN2A   | 16  | 10083589  | G   | 394 | 1.05 | 0.23 | 8.2E-01 | G                        | 292 | 1.23 | 0.25 | 4.2E-01 | G             | 281 | 0.75 | 0.31 | 3.5E-01 |
| rs4782041 | GRIN2A   | 16  | 9924405   | C   | 394 | 0.92 | 0.15 | 6.0E-01 | C                        | 292 | 0.96 | 0.18 | 8.4E-01 | C             | 281 | 0.93 | 0.19 | 7.2E-01 |
| rs4783432 | AIM      | 16  | 21858916  | A   | 393 | 1.15 | 0.18 | 4.4E-01 | A                        | 291 | 1.18 | 0.22 | 4.5E-01 | A             | 280 | 1.06 | 0.23 | 7.9E-01 |
| rs4785210 | ADCY7    | 16  | 48897655  | T   | 392 | 0.99 | 0.17 | 9.3E-01 | T                        | 290 | 1.05 | 0.20 | 8.3E-01 | T             | 279 | 1.03 | 0.22 | 8.9E-01 |
| rs4785400 | ADCY7    | 16  | 48868216  | G   | 394 | 0.93 | 0.15 | 6.1E-01 | G                        | 292 | 0.93 | 0.18 | 6.7E-01 | G             | 281 | 0.87 | 0.19 | 4.5E-01 |
| rs4787645 | AIM      | 16  | 30364851  | T   | 393 | 0.80 | 0.15 | 1.2E-01 | T                        | 291 | 0.71 | 0.18 | 5.6E-02 | T             | 281 | 0.90 | 0.18 | 5.7E-01 |
| rs4789145 | HN1      | 17  | 70646939  | C   | 394 | 1.05 | 0.15 | 7.7E-01 | C                        | 292 | 0.99 | 0.19 | 9.5E-01 | C             | 281 | 1.13 | 0.18 | 5.2E-01 |
| rs4790145 | TRPV3    | 17  | 3378436   | G   | 390 | 0.99 | 0.14 | 9.4E-01 | G                        | 290 | 0.93 | 0.17 | 6.6E-01 | G             | 277 | 1.10 | 0.18 | 5.8E-01 |
| rs4790522 | TRPV1    | 17  | 3416603   | A   | 394 | 0.93 | 0.14 | 6.2E-01 | A                        | 292 | 0.87 | 0.18 | 4.2E-01 | A             | 281 | 1.03 | 0.18 | 8.7E-01 |
| rs4792887 | CRHR1    | 17  | 41232791  | T   | 393 | 1.27 | 0.26 | 3.5E-01 | T                        | 291 | 1.57 | 0.30 | 1.3E-01 | T             | 281 | 0.86 | 0.35 | 6.7E-01 |
| rs4795742 | ACCN1    | 17  | 28428783  | C   | 394 | 1.64 | 0.18 | 6.8E-03 | C                        | 292 | 1.68 | 0.22 | 1.9E-02 | C             | 281 | 1.81 | 0.22 | 7.7E-03 |
| rs4795754 | ACCN1    | 17  | 28599288  | G   | 394 | 0.82 | 0.15 | 2.0E-01 | G                        | 292 | 0.83 | 0.18 | 3.0E-01 | G             | 281 | 0.86 | 0.19 | 4.3E-01 |
| rs4796123 | CCL5     | 17  | 31235573  | C   | 393 | 1.10 | 0.20 | 6.3E-01 | C                        | 291 | 0.93 | 0.26 | 7.9E-01 | C             | 280 | 1.22 | 0.24 | 4.0E-01 |
| rs4801893 | FPR2     | 19  | 56957884  | T   | 394 | 0.97 | 0.15 | 8.2E-01 | T                        | 292 | 1.07 | 0.18 | 7.1E-01 | T             | 281 | 0.86 | 0.19 | 4.2E-01 |
| rs4803455 | TGFB1    | 19  | 46543349  | A   | 391 | 1.04 | 0.15 | 7.7E-01 | A                        | 289 | 1.08 | 0.17 | 6.7E-01 | A             | 278 | 1.01 | 0.18 | 9.5E-01 |
| rs480575  | CAT      | 11  | 34424222  | G   | 380 | 1.16 | 0.17 | 3.7E-01 | G                        | 281 | 1.09 | 0.20 | 6.7E-01 | G             | 271 | 1.19 | 0.21 | 4.1E-01 |
| rs4806773 | NALP12   | 19  | 59000366  | C   | 394 | 1.20 | 0.23 | 4.3E-01 | C                        | 292 | 1.24 | 0.27 | 4.3E-01 | C             | 281 | 1.16 | 0.29 | 6.0E-01 |
| rs4821402 | MAPK1    | 22  | 20544746  | G   | 392 | 0.88 | 0.14 | 3.4E-01 | G                        | 290 | 1.08 | 0.17 | 6.4E-01 | G             | 280 | 0.70 | 0.18 | 4.8E-02 |
| rs4821735 | PICK1    | 22  | 36788915  | G   | 393 | 0.93 | 0.15 | 6.2E-01 | G                        | 291 | 1.05 | 0.17 | 7.9E-01 | G             | 280 | 0.81 | 0.19 | 2.6E-01 |
| rs4821875 | PDGFB    | 22  | 37956769  | A   | 393 | 1.06 | 0.15 | 7.0E-01 | A                        | 291 | 0.94 | 0.19 | 7.3E-01 | A             | 280 | 1.10 | 0.18 | 5.9E-01 |
| rs4830542 | ACE2     | 23  | 15486527  | C   | 394 | 1.02 | 0.15 | 8.8E-01 | C                        | 292 | 1.15 | 0.17 | 4.3E-01 | C             | 281 | 0.85 | 0.19 | 4.2E-01 |
| rs4839145 | ADORA3   | 1   | 111909358 | C   | 394 | 0.98 | 0.15 | 8.8E-01 | C                        | 292 | 0.96 | 0.18 | 8.3E-01 | C             | 281 | 0.98 | 0.19 | 9.1E-01 |
| rs4841401 | AIM      | 8   | 10527002  | C   | 392 | 0.84 | 0.15 | 2.4E-01 | C                        | 290 | 0.66 | 0.18 | 2.5E-02 | C             | 280 | 1.17 | 0.19 | 4.1E-01 |

| SNP       | GENE    | CHR | BP        | TMD |     |      |      |         | TMD with widespread pain |     |      |      |         | Localized TMD |     |      |      |         |
|-----------|---------|-----|-----------|-----|-----|------|------|---------|--------------------------|-----|------|------|---------|---------------|-----|------|------|---------|
|           |         |     |           | A1  | N   | OR   | SE   | P       | A1                       | N   | OR   | SE   | P       | A1            | N   | OR   | SE   | P       |
| rs4845652 | CHRNA2  | 1   | 152804829 | T   | 394 | 1.03 | 0.26 | 9.0E-01 | T                        | 292 | 1.09 | 0.31 | 7.8E-01 | T             | 281 | 1.09 | 0.33 | 8.0E-01 |
| rs4846052 | MTHFR   | 1   | 11780538  | T   | 394 | 1.01 | 0.15 | 9.4E-01 | T                        | 292 | 1.13 | 0.19 | 5.2E-01 | T             | 281 | 0.83 | 0.20 | 3.5E-01 |
| rs4848300 | IL1A    | 2   | 113244377 | C   | 394 | 1.06 | 0.15 | 7.0E-01 | C                        | 292 | 1.14 | 0.19 | 4.9E-01 | C             | 281 | 0.99 | 0.20 | 9.6E-01 |
| rs4863731 | AIM     | 4   | 141184618 | G   | 393 | 1.08 | 0.15 | 6.3E-01 | G                        | 291 | 1.06 | 0.18 | 7.6E-01 | G             | 280 | 1.06 | 0.19 | 7.6E-01 |
| rs4867798 | DRD1    | 5   | 174800505 | C   | 392 | 1.30 | 0.16 | 1.0E-01 | C                        | 291 | 1.31 | 0.19 | 1.6E-01 | C             | 279 | 1.28 | 0.20 | 2.2E-01 |
| rs4869682 | SLC1A3  | 5   | 36692475  | T   | 394 | 0.97 | 0.15 | 8.3E-01 | T                        | 292 | 0.88 | 0.18 | 4.7E-01 | T             | 281 | 1.06 | 0.18 | 7.3E-01 |
| rs4869817 | OPRM1   | 6   | 154508510 | A   | 389 | 1.06 | 0.14 | 6.7E-01 | A                        | 287 | 0.99 | 0.17 | 9.7E-01 | A             | 278 | 1.14 | 0.18 | 4.7E-01 |
| rs4877877 | NTRK2   | 9   | 86553244  | C   | 394 | 1.10 | 0.15 | 5.4E-01 | C                        | 292 | 1.22 | 0.18 | 2.7E-01 | C             | 281 | 1.04 | 0.20 | 8.3E-01 |
| rs4880213 | GRIN1   | 9   | 139150822 | T   | 394 | 0.81 | 0.15 | 1.5E-01 | T                        | 292 | 0.76 | 0.18 | 1.3E-01 | T             | 281 | 0.88 | 0.18 | 4.9E-01 |
| rs488133  | ESR1    | 6   | 152167137 | T   | 394 | 0.75 | 0.16 | 6.6E-02 | T                        | 292 | 0.69 | 0.19 | 5.2E-02 | T             | 281 | 0.79 | 0.19 | 2.2E-01 |
| rs4883544 | P2RX2   | 12  | 131712020 | T   | 393 | 0.92 | 0.14 | 5.7E-01 | T                        | 291 | 0.98 | 0.18 | 9.1E-01 | T             | 280 | 0.83 | 0.18 | 2.9E-01 |
| rs4889490 | AIM     | 16  | 30730548  | T   | 394 | 0.74 | 0.15 | 3.7E-02 | T                        | 292 | 0.63 | 0.18 | 9.5E-03 | T             | 281 | 0.91 | 0.18 | 6.2E-01 |
| rs4896857 | GRM1    | 6   | 146488865 | G   | 394 | 1.00 | 0.30 | 1.0E+00 | G                        | 292 | 0.94 | 0.36 | 8.5E-01 | G             | 281 | 0.97 | 0.37 | 9.3E-01 |
| rs4896864 | GRM1    | 6   | 146641193 | T   | 394 | 0.66 | 0.65 | 5.2E-01 | T                        | 292 | 0.59 | 0.83 | 5.3E-01 | T             | 281 | 0.67 | 0.83 | 6.2E-01 |
| rs489790  | ADRA1A  | 8   | 26772539  | A   | 394 | 0.92 | 0.21 | 6.8E-01 | A                        | 292 | 0.76 | 0.26 | 3.0E-01 | A             | 281 | 0.99 | 0.26 | 9.7E-01 |
| rs4905149 | DDX24   | 14  | 93586173  | T   | 394 | 1.00 | 0.15 | 1.0E+00 | T                        | 292 | 1.09 | 0.18 | 6.3E-01 | T             | 281 | 0.97 | 0.19 | 8.6E-01 |
| rs490528  | ARRB1   | 11  | 74679141  | C   | 394 | 0.99 | 0.16 | 9.4E-01 | C                        | 292 | 1.05 | 0.19 | 8.2E-01 | C             | 281 | 0.96 | 0.20 | 8.5E-01 |
| rs4905470 | BDKRB2  | 14  | 95762964  | A   | 394 | 0.86 | 0.20 | 4.3E-01 | A                        | 292 | 0.90 | 0.24 | 6.6E-01 | A             | 281 | 0.77 | 0.26 | 3.1E-01 |
| rs4905474 | BDKRB2  | 14  | 95767117  | A   | 393 | 0.76 | 0.18 | 1.2E-01 | A                        | 291 | 0.84 | 0.21 | 4.0E-01 | A             | 281 | 0.66 | 0.23 | 6.9E-02 |
| rs4905475 | BDKRB1  | 14  | 95791603  | C   | 394 | 0.61 | 0.26 | 5.7E-02 | C                        | 292 | 0.59 | 0.34 | 1.2E-01 | C             | 281 | 0.72 | 0.33 | 3.2E-01 |
| rs4906902 | GABRB3  | 15  | 24570861  | G   | 394 | 0.84 | 0.18 | 3.6E-01 | G                        | 292 | 1.02 | 0.22 | 9.3E-01 | G             | 281 | 0.71 | 0.24 | 1.6E-01 |
| rs4911878 | HTR2C   | 23  | 114047165 | A   | 393 | 0.82 | 0.20 | 3.1E-01 | A                        | 291 | 0.85 | 0.24 | 4.9E-01 | A             | 280 | 0.75 | 0.26 | 2.6E-01 |
| rs4917639 | CYP2C9  | 10  | 96715525  | C   | 394 | 1.02 | 0.18 | 9.3E-01 | C                        | 292 | 0.85 | 0.23 | 4.9E-01 | C             | 281 | 1.18 | 0.23 | 4.5E-01 |
| rs4921241 | ADRA1B  | 5   | 159299011 | C   | 393 | 1.63 | 0.20 | 1.4E-02 | C                        | 291 | 1.44 | 0.24 | 1.3E-01 | C             | 280 | 1.85 | 0.24 | 8.6E-03 |
| rs4923463 | BDNF    | 11  | 27629076  | G   | 394 | 0.94 | 0.17 | 7.3E-01 | G                        | 292 | 0.97 | 0.20 | 8.7E-01 | G             | 281 | 0.92 | 0.22 | 7.1E-01 |
| rs492540  | SLC6A13 | 12  | 221304    | A   | 394 | 0.85 | 0.17 | 3.5E-01 | A                        | 292 | 0.97 | 0.21 | 8.7E-01 | A             | 281 | 0.66 | 0.23 | 7.2E-02 |
| rs4925543 | NLRP3   | 1   | 245654154 | A   | 388 | 1.15 | 0.39 | 7.2E-01 | A                        | 288 | 0.95 | 0.49 | 9.1E-01 | A             | 275 | 1.27 | 0.47 | 6.1E-01 |
| rs4926240 | CACNA1A | 19  | 13212594  | T   | 392 | 1.10 | 0.16 | 5.4E-01 | T                        | 290 | 0.94 | 0.20 | 7.6E-01 | T             | 281 | 1.36 | 0.19 | 1.1E-01 |
| rs4926261 | CACNA1A | 19  | 13268095  | C   | 394 | 1.22 | 0.14 | 1.7E-01 | C                        | 292 | 1.25 | 0.18 | 2.1E-01 | C             | 281 | 1.12 | 0.18 | 5.2E-01 |
| rs4930634 | MRGPRD  | 11  | 68505779  | T   | 394 | 1.00 | 0.14 | 1.0E+00 | T                        | 292 | 1.12 | 0.17 | 5.2E-01 | T             | 281 | 0.83 | 0.18 | 3.2E-01 |
| rs4936285 | HTR3B   | 11  | 113322789 | C   | 394 | 1.05 | 0.18 | 7.9E-01 | C                        | 292 | 1.03 | 0.21 | 8.8E-01 | C             | 281 | 1.03 | 0.22 | 8.9E-01 |
| rs4937387 | KCNJ5   | 11  | 128278623 | C   | 394 | 1.27 | 0.15 | 1.1E-01 | C                        | 292 | 1.29 | 0.19 | 1.8E-01 | C             | 281 | 1.30 | 0.18 | 1.5E-01 |
| rs4937390 | KCNJ5   | 11  | 128285012 | C   | 394 | 0.82 | 0.14 | 1.6E-01 | C                        | 292 | 0.83 | 0.17 | 2.7E-01 | C             | 281 | 0.73 | 0.18 | 7.9E-02 |
| rs494024  | CAT     | 11  | 34421324  | T   | 393 | 0.94 | 0.15 | 7.0E-01 | T                        | 291 | 0.95 | 0.18 | 7.6E-01 | T             | 281 | 0.97 | 0.18 | 8.8E-01 |
| rs4941573 | HTR2A   | 13  | 46362858  | G   | 386 | 0.96 | 0.15 | 7.6E-01 | G                        | 285 | 1.13 | 0.19 | 5.3E-01 | G             | 276 | 0.84 | 0.19 | 3.8E-01 |
| rs4947510 | DDC     | 7   | 50492914  | A   | 394 | 1.03 | 0.16 | 8.7E-01 | A                        | 292 | 1.13 | 0.19 | 5.3E-01 | A             | 281 | 0.95 | 0.20 | 8.0E-01 |
| rs4947963 | EGFR    | 7   | 55055909  | C   | 394 | 1.00 | 0.15 | 1.0E+00 | C                        | 292 | 0.86 | 0.19 | 4.1E-01 | C             | 281 | 1.22 | 0.18 | 2.8E-01 |
| rs4949    | FMR1    | 23  | 146806873 | G   | 394 | 1.09 | 0.15 | 5.6E-01 | G                        | 292 | 1.14 | 0.18 | 4.6E-01 | G             | 281 | 1.01 | 0.18 | 9.7E-01 |
| rs4952085 | XDH     | 2   | 31424193  | G   | 394 | 1.39 | 0.17 | 6.0E-02 | G                        | 292 | 1.56 | 0.21 | 3.0E-02 | G             | 281 | 1.06 | 0.22 | 7.8E-01 |

| SNP       | GENE    | CHR | BP        | TMD |     |      |      |         | TMD with widespread pain |     |      |      |         | Localized TMD |     |      |      |         |
|-----------|---------|-----|-----------|-----|-----|------|------|---------|--------------------------|-----|------|------|---------|---------------|-----|------|------|---------|
|           |         |     |           | A1  | N   | OR   | SE   | P       | A1                       | N   | OR   | SE   | P       | A1            | N   | OR   | SE   | P       |
| rs4952774 | PRKCE   | 2   | 45874885  | T   | 394 | 0.85 | 0.25 | 5.3E-01 | T                        | 292 | 0.92 | 0.31 | 7.9E-01 | T             | 281 | 0.84 | 0.34 | 6.1E-01 |
| rs495360  | SLC6A13 | 12  | 197682    | C   | 393 | 0.93 | 0.14 | 6.1E-01 | C                        | 291 | 0.86 | 0.17 | 4.0E-01 | C             | 281 | 0.97 | 0.18 | 8.6E-01 |
| rs495491  | OPRM1   | 6   | 154424235 | G   | 394 | 0.93 | 0.16 | 6.3E-01 | G                        | 292 | 0.81 | 0.20 | 3.0E-01 | G             | 281 | 1.07 | 0.20 | 7.3E-01 |
| rs4958667 | GRIA1   | 5   | 152940571 | G   | 394 | 0.93 | 0.15 | 6.0E-01 | G                        | 292 | 0.94 | 0.18 | 7.2E-01 | G             | 281 | 0.88 | 0.19 | 5.1E-01 |
| rs4958672 | GRIA1   | 5   | 153028245 | A   | 394 | 1.07 | 0.15 | 6.6E-01 | A                        | 292 | 1.06 | 0.17 | 7.3E-01 | A             | 281 | 1.06 | 0.19 | 7.6E-01 |
| rs4958676 | GRIA1   | 5   | 153132470 | A   | 394 | 1.15 | 0.18 | 4.3E-01 | A                        | 292 | 1.21 | 0.22 | 3.9E-01 | A             | 281 | 1.20 | 0.22 | 4.2E-01 |
| rs4968382 | AIM     | 17  | 54947497  | A   | 392 | 1.04 | 0.16 | 8.1E-01 | A                        | 290 | 1.15 | 0.19 | 4.6E-01 | A             | 280 | 0.91 | 0.21 | 6.5E-01 |
| rs4968591 | ACE     | 17  | 58951850  | C   | 394 | 0.90 | 0.14 | 4.7E-01 | C                        | 292 | 0.95 | 0.18 | 7.6E-01 | C             | 281 | 0.83 | 0.18 | 3.2E-01 |
| rs4971234 | BTG2    | 1   | 201539989 | A   | 394 | 0.90 | 0.23 | 6.4E-01 | A                        | 292 | 0.94 | 0.28 | 8.2E-01 | A             | 281 | 0.80 | 0.30 | 4.6E-01 |
| rs497332  | OPRM1   | 6   | 154473085 | C   | 394 | 1.17 | 0.25 | 5.3E-01 | C                        | 292 | 1.12 | 0.30 | 7.0E-01 | C             | 281 | 1.11 | 0.31 | 7.3E-01 |
| rs4973377 | HTR2B   | 2   | 231690236 | A   | 393 | 1.09 | 0.19 | 6.6E-01 | A                        | 291 | 1.21 | 0.22 | 4.0E-01 | A             | 280 | 0.92 | 0.24 | 7.1E-01 |
| rs4975646 | SLC6A3  | 5   | 1486401   | A   | 376 | 1.02 | 0.15 | 9.1E-01 | A                        | 279 | 0.99 | 0.18 | 9.6E-01 | A             | 266 | 1.12 | 0.20 | 5.8E-01 |
| rs4981115 | AIM     | 14  | 31240826  | T   | 393 | 1.27 | 0.28 | 4.1E-01 | T                        | 291 | 1.58 | 0.32 | 1.6E-01 | T             | 280 | 0.92 | 0.38 | 8.2E-01 |
| rs498177  | HTR2C   | 23  | 113730946 | G   | 393 | 1.18 | 0.15 | 2.7E-01 | G                        | 291 | 1.21 | 0.18 | 2.9E-01 | G             | 281 | 1.13 | 0.19 | 5.1E-01 |
| rs498246  | ADRA1A  | 8   | 26788028  | G   | 394 | 1.00 | 0.37 | 1.0E+00 | G                        | 292 | 0.78 | 0.47 | 5.9E-01 | G             | 281 | 1.15 | 0.44 | 7.5E-01 |
| rs498631  | SCN1A   | 2   | 166585423 | C   | 394 | 1.00 | 0.14 | 1.0E+00 | C                        | 292 | 1.22 | 0.18 | 2.7E-01 | C             | 281 | 0.81 | 0.18 | 2.5E-01 |
| rs4986790 | TLR4    | 9   | 119515123 | G   | 394 | 0.52 | 0.30 | 3.3E-02 | G                        | 292 | 0.55 | 0.36 | 1.0E-01 | G             | 281 | 0.43 | 0.42 | 4.0E-02 |
| rs499167  | CHRM5   | 15  | 32135630  | A   | 394 | 1.15 | 0.16 | 3.8E-01 | A                        | 292 | 1.09 | 0.19 | 6.4E-01 | A             | 281 | 1.26 | 0.19 | 2.4E-01 |
| rs4998    | ADRB3   | 8   | 37940643  | G   | 394 | 0.69 | 0.26 | 1.6E-01 | G                        | 292 | 0.79 | 0.32 | 4.6E-01 | G             | 281 | 0.66 | 0.35 | 2.3E-01 |
| rs502434  | GRIA3   | 23  | 122364958 | T   | 394 | 0.86 | 0.15 | 3.1E-01 | T                        | 292 | 0.82 | 0.18 | 2.6E-01 | T             | 281 | 0.89 | 0.18 | 5.0E-01 |
| rs502453  | GRIA4   | 11  | 105321088 | G   | 394 | 0.87 | 0.20 | 4.9E-01 | G                        | 292 | 0.79 | 0.24 | 3.1E-01 | G             | 281 | 0.90 | 0.25 | 6.7E-01 |
| rs5029748 | IKBKB   | 8   | 42259706  | T   | 394 | 0.86 | 0.16 | 3.4E-01 | T                        | 292 | 0.83 | 0.20 | 3.5E-01 | T             | 281 | 0.85 | 0.20 | 4.3E-01 |
| rs5046    | AGT     | 1   | 228917021 | A   | 394 | 0.76 | 0.24 | 2.4E-01 | A                        | 292 | 0.56 | 0.32 | 6.7E-02 | A             | 281 | 0.93 | 0.29 | 8.1E-01 |
| rs5049    | AGT     | 1   | 228916706 | T   | 394 | 0.81 | 0.23 | 3.5E-01 | T                        | 292 | 0.64 | 0.31 | 1.5E-01 | T             | 281 | 0.93 | 0.29 | 8.1E-01 |
| rs506233  | ARRB1   | 11  | 74690183  | G   | 392 | 1.20 | 0.15 | 2.2E-01 | G                        | 291 | 1.25 | 0.18 | 2.1E-01 | G             | 280 | 1.10 | 0.19 | 6.0E-01 |
| rs508859  | P2RY2   | 11  | 72608454  | G   | 389 | 0.68 | 0.21 | 6.4E-02 | G                        | 289 | 0.61 | 0.26 | 6.0E-02 | G             | 279 | 0.72 | 0.26 | 2.2E-01 |
| rs508865  | HTR2C   | 23  | 113720371 | C   | 394 | 1.26 | 0.15 | 1.3E-01 | C                        | 292 | 1.27 | 0.19 | 2.0E-01 | C             | 281 | 1.29 | 0.19 | 1.7E-01 |
| rs511662  | ADRA1A  | 8   | 26762123  | C   | 394 | 0.99 | 0.17 | 9.3E-01 | C                        | 292 | 1.11 | 0.20 | 6.0E-01 | C             | 281 | 0.87 | 0.22 | 5.2E-01 |
| rs511895  | CAT     | 11  | 34444305  | T   | 393 | 0.93 | 0.15 | 6.2E-01 | T                        | 291 | 0.93 | 0.18 | 7.1E-01 | T             | 280 | 0.95 | 0.18 | 7.9E-01 |
| rs5182    | AGTR1   | 3   | 149942085 | T   | 394 | 0.91 | 0.15 | 5.1E-01 | T                        | 292 | 0.79 | 0.18 | 2.1E-01 | T             | 281 | 1.03 | 0.19 | 8.6E-01 |
| rs5183    | AGTR1   | 3   | 149942574 | G   | 394 | 1.53 | 0.30 | 1.5E-01 | G                        | 292 | 1.36 | 0.34 | 3.7E-01 | G             | 281 | 1.53 | 0.35 | 2.2E-01 |
| rs519270  | GABRA2  | 4   | 45969208  | T   | 394 | 0.97 | 0.14 | 8.3E-01 | T                        | 292 | 0.98 | 0.17 | 9.0E-01 | T             | 281 | 0.99 | 0.18 | 9.4E-01 |
| rs5215    | KCNJ11  | 11  | 17365206  | C   | 393 | 1.00 | 0.15 | 9.8E-01 | C                        | 292 | 0.88 | 0.18 | 4.6E-01 | C             | 280 | 1.17 | 0.18 | 4.0E-01 |
| rs521674  | ADRA2A  | 10  | 112825580 | T   | 390 | 0.85 | 0.16 | 3.0E-01 | T                        | 289 | 1.01 | 0.19 | 9.6E-01 | T             | 280 | 0.66 | 0.21 | 5.2E-02 |
| rs5224    | BDKRB2  | 14  | 95777210  | A   | 393 | 1.48 | 0.19 | 4.3E-02 | A                        | 292 | 1.56 | 0.23 | 5.5E-02 | A             | 280 | 1.59 | 0.25 | 6.1E-02 |
| rs526805  | GABRA2  | 4   | 45958148  | C   | 393 | 0.97 | 0.14 | 8.4E-01 | C                        | 291 | 1.00 | 0.17 | 9.9E-01 | C             | 280 | 0.97 | 0.18 | 8.5E-01 |
| rs5275    | PTGS2   | 1   | 184909681 | G   | 394 | 1.11 | 0.15 | 5.0E-01 | G                        | 292 | 1.09 | 0.19 | 6.4E-01 | G             | 281 | 1.15 | 0.19 | 4.7E-01 |
| rs5277    | PTGS2   | 1   | 184914820 | G   | 393 | 0.88 | 0.19 | 4.9E-01 | G                        | 291 | 0.86 | 0.23 | 5.2E-01 | G             | 280 | 0.85 | 0.24 | 5.0E-01 |
| rs528257  | ADRA1A  | 8   | 26777213  | T   | 385 | 0.86 | 0.14 | 3.0E-01 | T                        | 284 | 0.89 | 0.17 | 5.0E-01 | T             | 277 | 0.85 | 0.18 | 3.5E-01 |

| SNP       | GENE    | CHR | BP        | TMD |     |      |      |         | TMD with widespread pain |     |      |      |         | Localized TMD |     |      |      |         |
|-----------|---------|-----|-----------|-----|-----|------|------|---------|--------------------------|-----|------|------|---------|---------------|-----|------|------|---------|
|           |         |     |           | A1  | N   | OR   | SE   | P       | A1                       | N   | OR   | SE   | P       | A1            | N   | OR   | SE   | P       |
| rs528833  | ARRB1   | 11  | 74658687  | A   | 394 | 0.97 | 0.14 | 8.3E-01 | A                        | 292 | 0.99 | 0.17 | 9.6E-01 | A             | 281 | 0.98 | 0.18 | 8.9E-01 |
| rs529520  | OPRD1   | 1   | 29047533  | A   | 393 | 1.26 | 0.15 | 1.1E-01 | A                        | 292 | 1.24 | 0.18 | 2.3E-01 | A             | 280 | 1.24 | 0.18 | 2.4E-01 |
| rs5320    | DBH     | 9   | 135497294 | A   | 378 | 1.69 | 0.32 | 1.0E-01 | A                        | 278 | 1.71 | 0.39 | 1.7E-01 | A             | 270 | 1.72 | 0.37 | 1.4E-01 |
| rs5326    | DRD1    | 5   | 174802802 | T   | 394 | 1.53 | 0.21 | 4.2E-02 | T                        | 292 | 1.31 | 0.26 | 3.0E-01 | T             | 281 | 1.84 | 0.25 | 1.4E-02 |
| rs533123  | OPRD1   | 1   | 29013742  | G   | 377 | 1.04 | 0.19 | 8.5E-01 | G                        | 279 | 1.08 | 0.23 | 7.4E-01 | G             | 267 | 1.08 | 0.24 | 7.5E-01 |
| rs534798  | SCN1A   | 2   | 166693302 | G   | 394 | 0.93 | 0.21 | 7.5E-01 | G                        | 292 | 0.77 | 0.28 | 3.7E-01 | G             | 281 | 1.14 | 0.26 | 6.2E-01 |
| rs536220  | ADRA1A  | 8   | 26784354  | G   | 393 | 0.80 | 0.14 | 1.2E-01 | G                        | 291 | 0.84 | 0.17 | 3.1E-01 | G             | 280 | 0.79 | 0.18 | 1.8E-01 |
| rs5374    | GALR1   | 18  | 73091633  | T   | 386 | 1.31 | 0.16 | 8.1E-02 | T                        | 287 | 1.17 | 0.19 | 4.0E-01 | T             | 275 | 1.62 | 0.20 | 1.5E-02 |
| rs538378  | ADRA1A  | 8   | 26772632  | A   | 392 | 0.92 | 0.21 | 6.8E-01 | A                        | 291 | 0.76 | 0.26 | 2.9E-01 | A             | 279 | 1.00 | 0.26 | 9.9E-01 |
| rs540375  | GRIA1   | 5   | 152858920 | G   | 393 | 0.97 | 0.16 | 8.5E-01 | G                        | 291 | 0.92 | 0.19 | 6.5E-01 | G             | 281 | 0.99 | 0.20 | 9.6E-01 |
| rs540825  | OPRM1   | 6   | 154456139 | A   | 393 | 0.99 | 0.17 | 9.7E-01 | A                        | 291 | 1.06 | 0.20 | 7.8E-01 | A             | 280 | 0.87 | 0.22 | 5.4E-01 |
| rs541805  | AIM     | 9   | 25924932  | G   | 393 | 1.07 | 0.17 | 7.0E-01 | G                        | 291 | 0.89 | 0.23 | 5.9E-01 | G             | 281 | 1.30 | 0.21 | 2.1E-01 |
| rs542269  | CHRM1   | 11  | 62442113  | C   | 394 | 1.14 | 0.15 | 3.7E-01 | C                        | 292 | 1.21 | 0.18 | 2.9E-01 | C             | 281 | 1.04 | 0.19 | 8.4E-01 |
| rs545654  | NOS1    | 12  | 116261432 | C   | 394 | 0.99 | 0.15 | 9.4E-01 | C                        | 292 | 0.97 | 0.18 | 8.9E-01 | C             | 281 | 1.09 | 0.18 | 6.3E-01 |
| rs548339  | OPRM1   | 6   | 154502491 | T   | 394 | 1.04 | 0.15 | 8.2E-01 | T                        | 292 | 1.07 | 0.19 | 7.4E-01 | T             | 281 | 0.93 | 0.19 | 7.1E-01 |
| rs5514    | KLK1    | 19  | 56019345  | A   | 393 | 0.66 | 0.32 | 2.0E-01 | A                        | 291 | 0.69 | 0.41 | 3.7E-01 | A             | 280 | 0.77 | 0.41 | 5.3E-01 |
| rs5517    | KLK1    | 19  | 56015044  | C   | 394 | 0.81 | 0.16 | 1.8E-01 | C                        | 292 | 1.02 | 0.19 | 9.3E-01 | C             | 281 | 0.64 | 0.22 | 3.9E-02 |
| rs552878  | SCN1A   | 2   | 166561300 | C   | 394 | 1.15 | 0.15 | 3.6E-01 | C                        | 292 | 0.92 | 0.20 | 6.6E-01 | C             | 281 | 1.41 | 0.18 | 6.2E-02 |
| rs554576  | CAT     | 11  | 34440470  | T   | 394 | 0.97 | 0.15 | 8.3E-01 | T                        | 292 | 0.92 | 0.18 | 6.6E-01 | T             | 281 | 1.03 | 0.18 | 8.7E-01 |
| rs555044  | SLC6A13 | 12  | 206183    | A   | 394 | 0.94 | 0.16 | 7.0E-01 | A                        | 292 | 0.85 | 0.20 | 4.0E-01 | A             | 281 | 1.08 | 0.19 | 7.0E-01 |
| rs556399  | AIM     | 9   | 109995109 | A   | 394 | 0.96 | 0.14 | 7.8E-01 | A                        | 292 | 0.97 | 0.17 | 8.6E-01 | A             | 281 | 0.88 | 0.18 | 4.7E-01 |
| rs556793  | ADRA1A  | 8   | 26754984  | C   | 392 | 0.95 | 0.15 | 7.2E-01 | C                        | 290 | 0.93 | 0.18 | 6.9E-01 | C             | 279 | 0.93 | 0.19 | 7.1E-01 |
| rs5569    | SLC6A2  | 16  | 54289336  | A   | 394 | 1.04 | 0.15 | 7.7E-01 | A                        | 292 | 1.02 | 0.17 | 9.2E-01 | A             | 281 | 1.05 | 0.19 | 7.9E-01 |
| rs5574    | NPY     | 7   | 24295658  | T   | 394 | 1.25 | 0.15 | 1.3E-01 | T                        | 292 | 1.10 | 0.17 | 5.7E-01 | T             | 281 | 1.42 | 0.19 | 6.5E-02 |
| rs557451  | P2RY2   | 11  | 72604767  | G   | 394 | 0.72 | 0.27 | 2.3E-01 | G                        | 292 | 0.67 | 0.34 | 2.4E-01 | G             | 281 | 0.75 | 0.35 | 4.0E-01 |
| rs561712  | NOS1    | 12  | 116236452 | T   | 393 | 1.00 | 0.15 | 9.9E-01 | T                        | 291 | 0.82 | 0.18 | 2.6E-01 | T             | 281 | 1.18 | 0.18 | 3.5E-01 |
| rs563649  | OPRM1   | 6   | 154449660 | T   | 394 | 0.78 | 0.27 | 3.5E-01 | T                        | 292 | 0.73 | 0.35 | 3.8E-01 | T             | 281 | 0.84 | 0.34 | 6.1E-01 |
| rs5638    | PNMT    | 17  | 35079775  | G   | 387 | 1.48 | 0.65 | 5.5E-01 | G                        | 286 | 1.77 | 0.83 | 4.9E-01 | G             | 274 | 2.01 | 0.83 | 4.0E-01 |
| rs564250  | CAT     | 11  | 34415437  | T   | 394 | 1.08 | 0.17 | 6.6E-01 | T                        | 292 | 1.33 | 0.20 | 1.6E-01 | T             | 281 | 0.83 | 0.22 | 4.2E-01 |
| rs5671    | PTGER3  | 1   | 71285231  | A   | 393 | 1.39 | 0.26 | 2.0E-01 | A                        | 291 | 1.76 | 0.29 | 5.4E-02 | A             | 281 | 0.98 | 0.34 | 9.4E-01 |
| rs5693    | PTGER3  | 1   | 71247370  | G   | 394 | 0.75 | 0.18 | 1.1E-01 | G                        | 292 | 0.63 | 0.24 | 5.1E-02 | G             | 281 | 0.78 | 0.23 | 2.7E-01 |
| rs569796  | ARRB1   | 11  | 74728490  | C   | 394 | 0.79 | 0.17 | 1.6E-01 | C                        | 292 | 0.75 | 0.21 | 1.7E-01 | C             | 281 | 0.81 | 0.21 | 3.1E-01 |
| rs570138  | GABBR2  | 9   | 100507758 | A   | 394 | 1.31 | 0.18 | 1.3E-01 | A                        | 292 | 1.24 | 0.22 | 3.2E-01 | A             | 281 | 1.48 | 0.22 | 7.5E-02 |
| rs5702    | PTGER3  | 1   | 71104018  | A   | 394 | 0.85 | 0.17 | 3.4E-01 | A                        | 292 | 0.86 | 0.21 | 4.6E-01 | A             | 281 | 0.86 | 0.22 | 4.7E-01 |
| rs573400  | GABRA2  | 4   | 45946823  | C   | 394 | 0.99 | 0.14 | 9.4E-01 | C                        | 292 | 0.97 | 0.18 | 8.6E-01 | C             | 281 | 1.06 | 0.18 | 7.4E-01 |
| rs573496  | GRIA1   | 5   | 152873626 | T   | 393 | 0.99 | 0.18 | 9.5E-01 | T                        | 292 | 0.91 | 0.22 | 6.7E-01 | T             | 280 | 1.20 | 0.22 | 4.3E-01 |
| rs573514  | ADRA1A  | 8   | 26777198  | G   | 393 | 0.86 | 0.15 | 3.2E-01 | G                        | 291 | 0.88 | 0.18 | 4.6E-01 | G             | 280 | 0.88 | 0.18 | 4.7E-01 |
| rs5742632 | IGF1    | 12  | 101380604 | G   | 394 | 0.75 | 0.17 | 8.7E-02 | G                        | 292 | 0.72 | 0.21 | 1.1E-01 | G             | 281 | 0.76 | 0.21 | 1.8E-01 |
| rs5761159 | ADRBK2  | 22  | 24432308  | T   | 394 | 0.74 | 0.15 | 4.6E-02 | T                        | 292 | 0.61 | 0.19 | 9.8E-03 | T             | 281 | 0.97 | 0.19 | 8.8E-01 |

| SNP       | GENE    | CHR | BP        | TMD |     |      |      |         | TMD with widespread pain |     |      |      |         | Localized TMD |     |      |      |         |
|-----------|---------|-----|-----------|-----|-----|------|------|---------|--------------------------|-----|------|------|---------|---------------|-----|------|------|---------|
|           |         |     |           | A1  | N   | OR   | SE   | P       | A1                       | N   | OR   | SE   | P       | A1            | N   | OR   | SE   | P       |
| rs5789    | PTGS1   | 9   | 124183794 | A   | 394 | 0.55 | 0.40 | 1.4E-01 | A                        | 292 | 0.80 | 0.43 | 6.0E-01 | A             | 281 | 0.23 | 0.75 | 4.8E-02 |
| rs585156  | PRKCE   | 2   | 45755259  | C   | 394 | 0.96 | 0.16 | 8.1E-01 | C                        | 292 | 1.09 | 0.19 | 6.4E-01 | C             | 281 | 0.87 | 0.21 | 5.0E-01 |
| rs588206  | PRKCE   | 2   | 45739765  | C   | 394 | 1.03 | 0.16 | 8.7E-01 | C                        | 292 | 1.06 | 0.19 | 7.8E-01 | C             | 281 | 1.05 | 0.20 | 8.3E-01 |
| rs589373  | PRKACB  | 1   | 84421173  | A   | 394 | 0.86 | 0.23 | 5.0E-01 | A                        | 292 | 0.50 | 0.33 | 3.8E-02 | A             | 281 | 1.21 | 0.26 | 4.5E-01 |
| rs5905512 | MAOB    | 23  | 43611338  | A   | 394 | 1.27 | 0.14 | 8.2E-02 | A                        | 292 | 1.18 | 0.16 | 3.1E-01 | A             | 281 | 1.40 | 0.17 | 4.8E-02 |
| rs5906729 | MAOA    | 23  | 43405315  | C   | 394 | 1.07 | 0.15 | 6.5E-01 | C                        | 292 | 1.12 | 0.19 | 5.4E-01 | C             | 281 | 0.98 | 0.19 | 9.1E-01 |
| rs5910006 | GRIA3   | 23  | 122443336 | C   | 394 | 0.87 | 0.14 | 3.3E-01 | C                        | 292 | 0.82 | 0.17 | 2.3E-01 | C             | 281 | 0.88 | 0.17 | 4.8E-01 |
| rs5917471 | CYBB    | 23  | 37537458  | T   | 394 | 0.84 | 0.15 | 2.4E-01 | T                        | 292 | 0.82 | 0.18 | 2.6E-01 | T             | 281 | 0.91 | 0.19 | 6.1E-01 |
| rs5934186 | GLRA2   | 23  | 14588416  | C   | 392 | 1.01 | 0.17 | 9.3E-01 | C                        | 291 | 0.96 | 0.20 | 8.5E-01 | C             | 279 | 1.04 | 0.21 | 8.7E-01 |
| rs5935787 | GLRA2   | 23  | 14600032  | T   | 394 | 0.98 | 0.15 | 8.8E-01 | T                        | 292 | 0.89 | 0.18 | 5.0E-01 | T             | 281 | 1.09 | 0.18 | 6.3E-01 |
| rs5935799 | GLRA2   | 23  | 14641184  | A   | 389 | 0.98 | 0.14 | 8.8E-01 | A                        | 288 | 0.88 | 0.17 | 4.7E-01 | A             | 278 | 1.08 | 0.17 | 6.5E-01 |
| rs5935802 | GLRA2   | 23  | 14651869  | C   | 394 | 0.97 | 0.14 | 8.3E-01 | C                        | 292 | 0.87 | 0.18 | 4.2E-01 | C             | 281 | 1.09 | 0.18 | 6.4E-01 |
| rs5964125 | CYBB    | 23  | 37543395  | G   | 394 | 0.96 | 0.19 | 8.5E-01 | G                        | 292 | 0.81 | 0.24 | 3.9E-01 | G             | 281 | 1.18 | 0.23 | 4.9E-01 |
| rs5980064 | GLRA2   | 23  | 14646660  | C   | 394 | 1.00 | 0.14 | 1.0E+00 | C                        | 292 | 0.89 | 0.17 | 5.2E-01 | C             | 281 | 1.11 | 0.18 | 5.6E-01 |
| rs5995570 | CSNK1E  | 22  | 37054078  | T   | 394 | 1.09 | 0.14 | 5.4E-01 | T                        | 292 | 1.00 | 0.16 | 9.8E-01 | T             | 281 | 1.19 | 0.17 | 3.1E-01 |
| rs5999752 | MAPK1   | 22  | 20518183  | A   | 389 | 1.13 | 0.14 | 3.7E-01 | A                        | 288 | 0.97 | 0.17 | 8.6E-01 | A             | 278 | 1.31 | 0.17 | 1.1E-01 |
| rs599980  | GRIA4   | 11  | 105224554 | G   | 394 | 1.55 | 0.21 | 3.5E-02 | G                        | 292 | 1.61 | 0.24 | 5.1E-02 | G             | 281 | 1.49 | 0.26 | 1.2E-01 |
| rs6001093 | CSNK1E  | 22  | 37031339  | C   | 394 | 0.98 | 0.17 | 9.3E-01 | C                        | 292 | 1.46 | 0.20 | 5.3E-02 | C             | 281 | 0.52 | 0.27 | 1.5E-02 |
| rs600674  | PRKACB  | 1   | 84473839  | T   | 394 | 1.25 | 0.18 | 2.1E-01 | T                        | 292 | 1.59 | 0.21 | 2.9E-02 | T             | 281 | 0.89 | 0.24 | 6.2E-01 |
| rs6017486 | KCNS1   | 20  | 43158293  | A   | 390 | 1.12 | 0.16 | 4.6E-01 | A                        | 291 | 1.28 | 0.19 | 1.9E-01 | A             | 278 | 0.90 | 0.21 | 6.1E-01 |
| rs6017488 | KCNS1   | 20  | 43164436  | G   | 394 | 0.65 | 0.20 | 3.0E-02 | G                        | 292 | 0.64 | 0.24 | 6.3E-02 | G             | 281 | 0.62 | 0.25 | 5.5E-02 |
| rs6023367 | AIM     | 20  | 52625318  | A   | 394 | 0.97 | 0.19 | 8.5E-01 | A                        | 292 | 0.93 | 0.22 | 7.4E-01 | A             | 281 | 1.00 | 0.23 | 9.8E-01 |
| rs602383  | PTGER3  | 1   | 71164234  | T   | 394 | 1.03 | 0.15 | 8.2E-01 | T                        | 292 | 0.94 | 0.18 | 7.1E-01 | T             | 281 | 1.17 | 0.19 | 4.0E-01 |
| rs6052456 | ADRA1D  | 20  | 4173573   | T   | 377 | 1.04 | 0.17 | 8.2E-01 | T                        | 279 | 1.00 | 0.21 | 9.9E-01 | T             | 268 | 1.07 | 0.22 | 7.7E-01 |
| rs6061779 | AIM     | 20  | 59414462  | A   | 392 | 0.99 | 0.20 | 9.6E-01 | A                        | 290 | 1.19 | 0.24 | 4.6E-01 | A             | 281 | 0.81 | 0.26 | 4.2E-01 |
| rs60637   | SCN8A   | 12  | 50487009  | C   | 388 | 0.81 | 0.16 | 1.8E-01 | C                        | 286 | 0.82 | 0.19 | 3.0E-01 | C             | 278 | 0.78 | 0.20 | 2.1E-01 |
| rs6067008 | STAU1   | 20  | 47254514  | C   | 394 | 1.20 | 0.16 | 2.6E-01 | C                        | 292 | 1.11 | 0.20 | 6.0E-01 | C             | 281 | 1.24 | 0.20 | 2.8E-01 |
| rs606816  | PRKACB  | 1   | 84492964  | A   | 394 | 1.63 | 0.26 | 6.1E-02 | A                        | 292 | 1.99 | 0.29 | 1.8E-02 | A             | 281 | 1.18 | 0.33 | 6.3E-01 |
| rs6089789 | OPRL1   | 20  | 62202436  | T   | 394 | 1.52 | 0.29 | 1.5E-01 | T                        | 292 | 1.62 | 0.34 | 1.6E-01 | T             | 281 | 1.41 | 0.37 | 3.6E-01 |
| rs6089930 | NTSR1   | 20  | 60829446  | G   | 392 | 0.85 | 0.15 | 2.7E-01 | G                        | 291 | 0.84 | 0.18 | 3.4E-01 | G             | 280 | 0.87 | 0.19 | 4.8E-01 |
| rs6090041 | OPRL1   | 20  | 62183120  | G   | 394 | 1.07 | 0.15 | 6.5E-01 | G                        | 292 | 1.13 | 0.19 | 5.2E-01 | G             | 281 | 1.07 | 0.20 | 7.4E-01 |
| rs6090043 | OPRL1   | 20  | 62188374  | T   | 394 | 0.94 | 0.15 | 6.6E-01 | T                        | 292 | 0.95 | 0.17 | 7.8E-01 | T             | 281 | 0.88 | 0.19 | 5.1E-01 |
| rs609148  | OPRM1   | 6   | 154472707 | A   | 394 | 1.00 | 0.16 | 1.0E+00 | A                        | 292 | 1.07 | 0.19 | 7.2E-01 | A             | 281 | 0.87 | 0.22 | 5.2E-01 |
| rs610115  | PRKCE   | 2   | 45731165  | G   | 389 | 0.89 | 0.15 | 4.4E-01 | G                        | 287 | 1.01 | 0.19 | 9.7E-01 | G             | 279 | 0.81 | 0.19 | 2.6E-01 |
| rs6104012 | KCNS1   | 20  | 43167985  | G   | 394 | 0.73 | 0.18 | 9.0E-02 | G                        | 292 | 0.66 | 0.23 | 6.5E-02 | G             | 281 | 0.76 | 0.22 | 2.2E-01 |
| rs610604  | TNFAIP3 | 6   | 138241110 | G   | 393 | 0.91 | 0.16 | 5.6E-01 | G                        | 291 | 0.94 | 0.19 | 7.3E-01 | G             | 281 | 0.94 | 0.20 | 7.5E-01 |
| rs6124684 | KCNS1   | 20  | 43154907  | T   | 394 | 1.10 | 0.16 | 5.3E-01 | T                        | 292 | 1.19 | 0.19 | 3.5E-01 | T             | 281 | 0.95 | 0.20 | 8.0E-01 |
| rs6141319 | AIM     | 20  | 30608468  | G   | 393 | 0.85 | 0.15 | 2.7E-01 | G                        | 291 | 0.82 | 0.18 | 2.9E-01 | G             | 280 | 0.87 | 0.19 | 4.5E-01 |
| rs615470  | CHRNA5  | 15  | 76673043  | T   | 393 | 1.00 | 0.14 | 9.8E-01 | T                        | 291 | 1.13 | 0.17 | 4.7E-01 | T             | 281 | 0.87 | 0.19 | 4.4E-01 |

| SNP       | GENE    | CHR | BP        | TMD |     |      |      |         | TMD with widespread pain |     |      |      |         | Localized TMD |     |      |      |         |
|-----------|---------|-----|-----------|-----|-----|------|------|---------|--------------------------|-----|------|------|---------|---------------|-----|------|------|---------|
|           |         |     |           | A1  | N   | OR   | SE   | P       | A1                       | N   | OR   | SE   | P       | A1            | N   | OR   | SE   | P       |
| rs616597  | NFKBIZ  | 3   | 103052416 | A   | 394 | 1.02 | 0.18 | 9.3E-01 | A                        | 292 | 1.20 | 0.21 | 3.9E-01 | A             | 281 | 0.83 | 0.24 | 4.3E-01 |
| rs616714  | ARRB1   | 11  | 74722288  | T   | 394 | 1.38 | 0.19 | 9.1E-02 | T                        | 292 | 1.72 | 0.22 | 1.5E-02 | T             | 281 | 1.12 | 0.24 | 6.4E-01 |
| rs618301  | GRIA4   | 11  | 105171218 | A   | 391 | 0.78 | 0.15 | 1.0E-01 | A                        | 290 | 0.82 | 0.19 | 2.7E-01 | A             | 278 | 0.77 | 0.19 | 1.7E-01 |
| rs621060  | CHRM3   | 1   | 238058909 | G   | 393 | 1.35 | 0.20 | 1.4E-01 | G                        | 291 | 1.20 | 0.25 | 4.7E-01 | G             | 280 | 1.48 | 0.24 | 1.0E-01 |
| rs6214    | IGF1    | 12  | 101317699 | T   | 394 | 0.84 | 0.14 | 2.3E-01 | T                        | 292 | 0.87 | 0.17 | 4.2E-01 | T             | 281 | 0.76 | 0.18 | 1.3E-01 |
| rs623956  | OPRM1   | 6   | 154471718 | G   | 394 | 1.00 | 0.16 | 1.0E+00 | G                        | 292 | 1.07 | 0.19 | 7.2E-01 | G             | 281 | 0.87 | 0.22 | 5.2E-01 |
| rs624945  | STAU1   | 20  | 47224258  | C   | 393 | 1.08 | 0.21 | 7.3E-01 | C                        | 291 | 1.10 | 0.26 | 7.1E-01 | C             | 281 | 1.04 | 0.27 | 8.9E-01 |
| rs6263    | DDC     | 7   | 50563394  | C   | 394 | 1.21 | 0.44 | 6.6E-01 | C                        | 292 | 1.69 | 0.48 | 2.7E-01 | C             | 281 | 0.59 | 0.67 | 4.4E-01 |
| rs6265    | BDNF    | 11  | 27636492  | T   | 392 | 0.93 | 0.18 | 6.7E-01 | T                        | 290 | 0.94 | 0.21 | 7.5E-01 | T             | 279 | 0.90 | 0.23 | 6.6E-01 |
| rs6269    | COMT    | 22  | 18329952  | G   | 392 | 1.16 | 0.14 | 2.9E-01 | G                        | 291 | 1.23 | 0.17 | 2.3E-01 | G             | 279 | 1.11 | 0.18 | 5.4E-01 |
| rs6277    | DRD2    | 11  | 112788669 | G   | 393 | 1.17 | 0.14 | 2.6E-01 | G                        | 291 | 1.04 | 0.17 | 8.1E-01 | G             | 281 | 1.34 | 0.18 | 1.1E-01 |
| rs6279    | DRD2    | 11  | 112786283 | G   | 393 | 1.20 | 0.15 | 2.4E-01 | G                        | 292 | 1.21 | 0.18 | 3.0E-01 | G             | 280 | 1.21 | 0.20 | 3.4E-01 |
| rs6280    | DRD3    | 3   | 115373505 | C   | 385 | 0.99 | 0.14 | 9.2E-01 | C                        | 285 | 1.10 | 0.17 | 5.9E-01 | C             | 272 | 0.93 | 0.19 | 6.8E-01 |
| rs6284    | GABRB1  | 4   | 47016976  | A   | 390 | 1.00 | 0.19 | 1.0E+00 | A                        | 289 | 0.99 | 0.23 | 9.8E-01 | A             | 278 | 1.03 | 0.24 | 8.9E-01 |
| rs628825  | AIM     | 12  | 110436233 | T   | 394 | 1.23 | 0.18 | 2.5E-01 | T                        | 292 | 1.16 | 0.21 | 4.8E-01 | T             | 281 | 1.25 | 0.23 | 3.3E-01 |
| rs6289    | GABRB1  | 4   | 47103466  | G   | 393 | 0.95 | 0.15 | 7.3E-01 | G                        | 291 | 1.03 | 0.18 | 8.8E-01 | G             | 280 | 0.89 | 0.19 | 5.3E-01 |
| rs6290    | GABRB1  | 4   | 47103595  | T   | 389 | 0.84 | 0.28 | 5.2E-01 | T                        | 290 | 0.61 | 0.39 | 2.1E-01 | T             | 277 | 1.12 | 0.33 | 7.3E-01 |
| rs6297    | HTR1B   | 6   | 78228660  | C   | 394 | 1.16 | 0.21 | 4.7E-01 | C                        | 292 | 1.25 | 0.25 | 3.8E-01 | C             | 281 | 1.06 | 0.26 | 8.2E-01 |
| rs6298    | HTR1B   | 6   | 78229711  | A   | 388 | 1.28 | 0.16 | 1.2E-01 | A                        | 288 | 1.20 | 0.20 | 3.6E-01 | A             | 278 | 1.38 | 0.20 | 1.1E-01 |
| rs6310    | HTR2A   | 13  | 46368353  | C   | 394 | 0.77 | 0.32 | 4.2E-01 | C                        | 292 | 0.59 | 0.44 | 2.4E-01 | C             | 281 | 1.06 | 0.38 | 8.7E-01 |
| rs6312    | HTR2A   | 13  | 46368825  | C   | 394 | 0.77 | 0.32 | 4.2E-01 | C                        | 292 | 0.59 | 0.44 | 2.4E-01 | C             | 281 | 1.06 | 0.38 | 8.7E-01 |
| rs6314    | HTR2A   | 13  | 46307035  | A   | 394 | 0.78 | 0.24 | 2.9E-01 | A                        | 292 | 0.84 | 0.28 | 5.3E-01 | A             | 281 | 0.63 | 0.31 | 1.3E-01 |
| rs6318    | HTR2C   | 23  | 113871991 | C   | 394 | 0.81 | 0.20 | 2.8E-01 | C                        | 292 | 0.83 | 0.24 | 4.4E-01 | C             | 281 | 0.78 | 0.25 | 3.3E-01 |
| rs6323    | MAOA    | 23  | 43475980  | G   | 394 | 0.98 | 0.15 | 8.8E-01 | G                        | 292 | 1.02 | 0.18 | 9.3E-01 | G             | 281 | 0.89 | 0.19 | 5.4E-01 |
| rs6330    | NGF     | 1   | 115630836 | A   | 394 | 1.01 | 0.15 | 9.4E-01 | A                        | 292 | 0.96 | 0.17 | 8.3E-01 | A             | 281 | 1.02 | 0.18 | 9.1E-01 |
| rs6337    | NTRK1   | 1   | 155115619 | C   | 394 | 1.03 | 0.16 | 8.7E-01 | C                        | 292 | 1.04 | 0.20 | 8.4E-01 | C             | 281 | 1.15 | 0.20 | 5.0E-01 |
| rs6355    | SLC6A4  | 17  | 25572936  | G   | 394 | 0.88 | 0.50 | 8.0E-01 | G                        | 292 | 0.59 | 0.68 | 4.4E-01 | G             | 281 | 1.13 | 0.57 | 8.3E-01 |
| rs6413419 | CYP2E1  | 10  | 135195665 | A   | 393 | 1.25 | 0.68 | 7.4E-01 | A                        | 291 | 0.44 | 1.13 | 4.7E-01 | A             | 280 | 2.06 | 0.72 | 3.2E-01 |
| rs6413420 | CYP2E1  | 10  | 135190819 | T   | 394 | 0.95 | 0.33 | 8.7E-01 | T                        | 292 | 1.39 | 0.35 | 3.6E-01 | T             | 281 | 0.40 | 0.55 | 9.8E-02 |
| rs6414248 | AIM     | 3   | 112365016 | G   | 394 | 0.88 | 0.17 | 4.5E-01 | G                        | 292 | 0.73 | 0.21 | 1.4E-01 | G             | 281 | 1.12 | 0.21 | 5.8E-01 |
| rs642544  | GRIA4   | 11  | 105242230 | G   | 394 | 0.97 | 0.15 | 8.2E-01 | G                        | 292 | 1.03 | 0.19 | 8.7E-01 | G             | 281 | 0.88 | 0.19 | 5.2E-01 |
| rs643272  | AIM     | 18  | 38442319  | T   | 394 | 0.98 | 0.15 | 8.8E-01 | T                        | 292 | 1.05 | 0.18 | 8.0E-01 | T             | 281 | 0.89 | 0.20 | 5.7E-01 |
| rs6432860 | SCN1A   | 2   | 166606110 | A   | 394 | 1.23 | 0.15 | 1.8E-01 | A                        | 292 | 0.96 | 0.20 | 8.4E-01 | A             | 281 | 1.50 | 0.18 | 2.7E-02 |
| rs6435660 | ERBB4   | 2   | 212280184 | T   | 394 | 1.11 | 0.14 | 4.7E-01 | T                        | 292 | 1.21 | 0.17 | 2.8E-01 | T             | 281 | 1.01 | 0.19 | 9.7E-01 |
| rs6437000 | HTR2B   | 2   | 231685771 | A   | 394 | 1.20 | 0.15 | 2.5E-01 | A                        | 292 | 1.19 | 0.19 | 3.5E-01 | A             | 281 | 1.17 | 0.19 | 4.0E-01 |
| rs6440047 | ATP1B3  | 3   | 143098749 | T   | 393 | 0.94 | 0.15 | 6.6E-01 | T                        | 291 | 0.93 | 0.18 | 6.8E-01 | T             | 280 | 0.92 | 0.19 | 6.6E-01 |
| rs6440049 | ATP1B3  | 3   | 143104769 | A   | 394 | 0.92 | 0.15 | 6.0E-01 | A                        | 292 | 0.88 | 0.19 | 4.9E-01 | A             | 281 | 0.95 | 0.19 | 7.9E-01 |
| rs6440735 | P2RY13  | 3   | 152527422 | T   | 392 | 1.27 | 0.17 | 1.6E-01 | T                        | 290 | 1.13 | 0.21 | 5.5E-01 | T             | 280 | 1.48 | 0.21 | 6.2E-02 |
| rs6442209 | SLC6A11 | 3   | 10853049  | C   | 394 | 0.67 | 0.34 | 2.5E-01 | C                        | 292 | 0.81 | 0.41 | 6.0E-01 | C             | 281 | 0.50 | 0.50 | 1.7E-01 |

| SNP       | GENE    | CHR | BP        | TMD |     |      |      |         | TMD with widespread pain |     |      |      |         | Localized TMD |     |      |      |         |
|-----------|---------|-----|-----------|-----|-----|------|------|---------|--------------------------|-----|------|------|---------|---------------|-----|------|------|---------|
|           |         |     |           | A1  | N   | OR   | SE   | P       | A1                       | N   | OR   | SE   | P       | A1            | N   | OR   | SE   | P       |
| rs6442211 | SLC6A11 | 3   | 10886151  | T   | 394 | 1.32 | 0.15 | 6.9E-02 | T                        | 292 | 1.20 | 0.19 | 3.3E-01 | T             | 281 | 1.50 | 0.19 | 3.0E-02 |
| rs6451535 | PTGER4  | 5   | 40723788  | G   | 394 | 1.03 | 0.16 | 8.7E-01 | G                        | 292 | 1.10 | 0.19 | 6.3E-01 | G             | 281 | 1.02 | 0.20 | 9.3E-01 |
| rs6454674 | CNR1    | 6   | 88929649  | G   | 394 | 1.07 | 0.15 | 6.4E-01 | G                        | 292 | 0.93 | 0.19 | 7.0E-01 | G             | 281 | 1.12 | 0.19 | 5.5E-01 |
| rs6454676 | CNR1    | 6   | 88934174  | A   | 393 | 0.93 | 0.23 | 7.4E-01 | A                        | 292 | 1.02 | 0.27 | 9.4E-01 | A             | 280 | 0.83 | 0.30 | 5.4E-01 |
| rs6457878 | MAPK14  | 6   | 36184258  | T   | 391 | 0.84 | 0.24 | 4.6E-01 | T                        | 289 | 0.77 | 0.33 | 4.2E-01 | T             | 279 | 1.13 | 0.30 | 6.9E-01 |
| rs6465606 | TAC1    | 7   | 97192511  | A   | 392 | 0.93 | 0.16 | 6.8E-01 | A                        | 290 | 0.88 | 0.20 | 5.2E-01 | A             | 280 | 1.01 | 0.21 | 9.7E-01 |
| rs6467538 | AKR1B10 | 7   | 133914826 | T   | 394 | 0.79 | 0.15 | 1.3E-01 | T                        | 292 | 0.99 | 0.18 | 9.6E-01 | T             | 281 | 0.65 | 0.21 | 3.9E-02 |
| rs6472257 | CRH     | 8   | 67254734  | T   | 394 | 0.89 | 0.24 | 6.3E-01 | T                        | 292 | 0.69 | 0.33 | 2.6E-01 | T             | 281 | 1.27 | 0.29 | 4.1E-01 |
| rs6472362 | AIM     | 8   | 68994970  | T   | 394 | 1.14 | 0.16 | 4.2E-01 | T                        | 292 | 1.13 | 0.19 | 5.2E-01 | T             | 281 | 1.25 | 0.20 | 2.7E-01 |
| rs6472788 | STAU2   | 8   | 74669553  | T   | 394 | 0.98 | 0.19 | 9.3E-01 | T                        | 292 | 0.96 | 0.22 | 8.5E-01 | T             | 281 | 0.98 | 0.24 | 9.3E-01 |
| rs6474388 | IKKBK   | 8   | 42306311  | A   | 394 | 0.57 | 0.31 | 7.2E-02 | A                        | 292 | 0.44 | 0.42 | 4.9E-02 | A             | 281 | 0.71 | 0.38 | 3.6E-01 |
| rs6479835 | PRKG1   | 10  | 52417629  | T   | 393 | 1.12 | 0.15 | 4.7E-01 | T                        | 291 | 1.09 | 0.18 | 6.2E-01 | T             | 281 | 1.12 | 0.19 | 5.6E-01 |
| rs6482597 | ARL5B   | 10  | 19004846  | G   | 394 | 1.05 | 0.15 | 7.6E-01 | G                        | 292 | 1.05 | 0.18 | 7.8E-01 | G             | 281 | 0.96 | 0.19 | 8.2E-01 |
| rs648893  | OPRM1   | 6   | 154480321 | G   | 394 | 1.00 | 0.16 | 1.0E+00 | G                        | 292 | 1.07 | 0.19 | 7.2E-01 | G             | 281 | 0.87 | 0.22 | 5.2E-01 |
| rs6490121 | NOS1    | 12  | 116192578 | G   | 392 | 1.01 | 0.15 | 9.4E-01 | G                        | 291 | 1.36 | 0.18 | 9.3E-02 | G             | 279 | 0.71 | 0.20 | 8.5E-02 |
| rs6496858 | AIM     | 15  | 90062853  | G   | 394 | 1.41 | 0.21 | 9.9E-02 | G                        | 292 | 1.58 | 0.25 | 7.3E-02 | G             | 281 | 1.50 | 0.27 | 1.3E-01 |
| rs650245  | OPRM1   | 6   | 154470394 | A   | 394 | 1.21 | 0.25 | 4.5E-01 | A                        | 292 | 1.12 | 0.30 | 7.0E-01 | A             | 281 | 1.18 | 0.30 | 5.8E-01 |
| rs6510332 | AIM     | 19  | 38222770  | A   | 393 | 0.91 | 0.16 | 5.4E-01 | A                        | 291 | 1.06 | 0.19 | 7.6E-01 | A             | 280 | 0.80 | 0.20 | 2.8E-01 |
| rs6516925 | GRIK1   | 21  | 29977499  | G   | 386 | 1.56 | 0.34 | 1.9E-01 | G                        | 285 | 0.98 | 0.46 | 9.7E-01 | G             | 276 | 2.10 | 0.38 | 5.4E-02 |
| rs6517428 | KCNJ6   | 21  | 37979315  | C   | 394 | 1.42 | 0.59 | 5.6E-01 | C                        | 292 | 1.85 | 0.64 | 3.4E-01 | C             | 281 | 0.80 | 0.85 | 8.0E-01 |
| rs6517442 | KCNJ6   | 21  | 38211816  | C   | 394 | 0.86 | 0.16 | 3.1E-01 | C                        | 292 | 0.87 | 0.19 | 4.5E-01 | C             | 281 | 0.87 | 0.19 | 4.6E-01 |
| rs6526822 | GLRA2   | 23  | 14577617  | T   | 394 | 1.00 | 0.15 | 1.0E+00 | T                        | 292 | 0.91 | 0.18 | 6.1E-01 | T             | 281 | 1.09 | 0.18 | 6.4E-01 |
| rs6534365 | FGF2    | 4   | 124004898 | T   | 393 | 0.80 | 0.15 | 1.3E-01 | T                        | 291 | 0.85 | 0.18 | 3.5E-01 | T             | 280 | 0.77 | 0.19 | 1.7E-01 |
| rs653576  | ACCN2   | 12  | 48738975  | C   | 391 | 0.90 | 0.43 | 8.0E-01 | C                        | 289 | 0.80 | 0.55 | 6.9E-01 | C             | 278 | 1.09 | 0.52 | 8.7E-01 |
| rs6536221 | GRIA2   | 4   | 158363336 | G   | 394 | 0.96 | 0.21 | 8.3E-01 | G                        | 292 | 1.02 | 0.26 | 9.4E-01 | G             | 281 | 0.96 | 0.28 | 8.9E-01 |
| rs6536231 | GRIA2   | 4   | 158445130 | A   | 394 | 1.08 | 0.16 | 6.4E-01 | A                        | 292 | 1.11 | 0.19 | 6.0E-01 | A             | 281 | 1.09 | 0.20 | 6.7E-01 |
| rs6536234 | GRIA2   | 4   | 158495464 | C   | 394 | 0.84 | 0.15 | 2.5E-01 | C                        | 292 | 0.89 | 0.19 | 5.3E-01 | C             | 281 | 0.83 | 0.19 | 3.2E-01 |
| rs6536721 | NPY5R   | 4   | 164496347 | A   | 390 | 1.24 | 0.15 | 1.5E-01 | A                        | 288 | 1.15 | 0.18 | 4.3E-01 | A             | 279 | 1.42 | 0.19 | 6.5E-02 |
| rs6537860 | NGF     | 1   | 115657867 | A   | 394 | 0.84 | 0.16 | 2.5E-01 | A                        | 292 | 0.78 | 0.19 | 2.1E-01 | A             | 281 | 0.88 | 0.20 | 5.3E-01 |
| rs6544874 | PRKCE   | 2   | 46227889  | A   | 394 | 1.31 | 0.20 | 1.7E-01 | A                        | 292 | 1.16 | 0.25 | 5.5E-01 | A             | 281 | 1.64 | 0.24 | 3.9E-02 |
| rs6545976 | POMC    | 2   | 25248154  | T   | 394 | 1.56 | 0.36 | 2.2E-01 | T                        | 292 | 1.04 | 0.46 | 9.4E-01 | T             | 281 | 2.02 | 0.41 | 8.5E-02 |
| rs6546366 | PPP3R1  | 2   | 68343171  | A   | 390 | 1.08 | 0.15 | 6.0E-01 | A                        | 288 | 0.95 | 0.19 | 8.0E-01 | A             | 279 | 1.23 | 0.19 | 2.6E-01 |
| rs6546952 | TACR1   | 2   | 75155271  | T   | 390 | 0.79 | 0.14 | 8.4E-02 | T                        | 291 | 0.81 | 0.17 | 2.0E-01 | T             | 278 | 0.78 | 0.17 | 1.5E-01 |
| rs6552216 | AIM     | 4   | 178348998 | T   | 394 | 1.20 | 0.18 | 3.2E-01 | T                        | 292 | 1.27 | 0.21 | 2.6E-01 | T             | 281 | 1.05 | 0.23 | 8.3E-01 |
| rs655590  | AIM     | 1   | 35894634  | G   | 394 | 0.59 | 0.40 | 1.8E-01 | G                        | 292 | 0.48 | 0.52 | 1.6E-01 | G             | 281 | 0.65 | 0.49 | 3.8E-01 |
| rs6557171 | ESR1    | 6   | 152276286 | T   | 394 | 1.05 | 0.16 | 7.5E-01 | T                        | 292 | 0.89 | 0.20 | 5.6E-01 | T             | 281 | 1.22 | 0.20 | 3.1E-01 |
| rs6561333 | HTR2A   | 13  | 46318313  | T   | 394 | 0.91 | 0.14 | 5.2E-01 | T                        | 292 | 0.88 | 0.18 | 4.7E-01 | T             | 281 | 0.95 | 0.18 | 7.6E-01 |
| rs6570754 | GRM1    | 6   | 146636018 | G   | 393 | 1.26 | 0.31 | 4.6E-01 | G                        | 291 | 1.55 | 0.35 | 2.2E-01 | G             | 280 | 0.95 | 0.41 | 9.0E-01 |
| rs6576603 | GABRB3  | 15  | 24545745  | C   | 394 | 0.84 | 0.26 | 5.1E-01 | C                        | 292 | 0.73 | 0.34 | 3.5E-01 | C             | 281 | 0.94 | 0.32 | 8.6E-01 |

| SNP       | GENE    | CHR | BP        | TMD |     |      |      |         | TMD with widespread pain |     |      |      |         | Localized TMD |     |      |      |         |
|-----------|---------|-----|-----------|-----|-----|------|------|---------|--------------------------|-----|------|------|---------|---------------|-----|------|------|---------|
|           |         |     |           | A1  | N   | OR   | SE   | P       | A1                       | N   | OR   | SE   | P       | A1            | N   | OR   | SE   | P       |
| rs6579906 | GLRA1   | 5   | 151199199 | G   | 394 | 0.91 | 0.14 | 4.8E-01 | G                        | 292 | 0.84 | 0.17 | 3.0E-01 | G             | 281 | 0.93 | 0.18 | 7.0E-01 |
| rs6590356 | KCNJ5   | 11  | 128263279 | A   | 394 | 0.84 | 0.14 | 2.1E-01 | A                        | 292 | 0.76 | 0.17 | 1.0E-01 | A             | 281 | 0.92 | 0.17 | 6.4E-01 |
| rs6590357 | KCNJ5   | 11  | 128286549 | T   | 393 | 0.87 | 0.18 | 4.3E-01 | T                        | 291 | 0.87 | 0.22 | 5.1E-01 | T             | 281 | 0.79 | 0.23 | 3.2E-01 |
| rs6592517 | P2RY6   | 11  | 72655614  | G   | 394 | 1.02 | 0.19 | 9.2E-01 | G                        | 292 | 1.21 | 0.24 | 4.1E-01 | G             | 281 | 0.99 | 0.25 | 9.8E-01 |
| rs6593206 | EGFR    | 7   | 55147604  | C   | 394 | 1.02 | 0.15 | 8.8E-01 | C                        | 292 | 1.14 | 0.18 | 4.8E-01 | C             | 281 | 0.90 | 0.20 | 6.1E-01 |
| rs6593430 | AIM     | 10  | 44422502  | G   | 394 | 0.56 | 0.28 | 3.5E-02 | G                        | 292 | 0.75 | 0.33 | 3.7E-01 | G             | 281 | 0.43 | 0.41 | 3.7E-02 |
| rs6595142 | AIM     | 5   | 117895090 | C   | 394 | 0.97 | 0.14 | 8.3E-01 | C                        | 292 | 0.83 | 0.17 | 2.9E-01 | C             | 281 | 1.10 | 0.18 | 6.1E-01 |
| rs6596438 | HSPA9   | 5   | 137933347 | G   | 394 | 1.23 | 0.15 | 1.5E-01 | G                        | 292 | 1.34 | 0.18 | 1.0E-01 | G             | 281 | 1.19 | 0.18 | 3.5E-01 |
| rs6599230 | SCN5A   | 3   | 38649716  | T   | 391 | 1.17 | 0.17 | 3.7E-01 | T                        | 290 | 1.34 | 0.20 | 1.5E-01 | T             | 279 | 1.02 | 0.23 | 9.3E-01 |
| rs6599240 | SCN10A  | 3   | 38713721  | A   | 394 | 0.81 | 0.14 | 1.5E-01 | A                        | 292 | 0.75 | 0.18 | 1.1E-01 | A             | 281 | 0.81 | 0.18 | 2.5E-01 |
| rs6599257 | SCN10A  | 3   | 38779592  | C   | 394 | 0.99 | 0.15 | 9.4E-01 | C                        | 292 | 0.92 | 0.19 | 6.6E-01 | C             | 281 | 1.04 | 0.18 | 8.4E-01 |
| rs660652  | CHRNA5  | 15  | 76674887  | A   | 394 | 0.99 | 0.14 | 9.4E-01 | A                        | 292 | 1.11 | 0.17 | 5.3E-01 | A             | 281 | 0.87 | 0.19 | 4.4E-01 |
| rs660756  | OPRM1   | 6   | 154457127 | G   | 393 | 1.01 | 0.15 | 9.7E-01 | G                        | 291 | 0.98 | 0.18 | 9.1E-01 | G             | 280 | 0.98 | 0.19 | 9.3E-01 |
| rs661000  | PTGER3  | 1   | 71194152  | G   | 394 | 0.88 | 0.16 | 4.0E-01 | G                        | 292 | 0.84 | 0.19 | 3.7E-01 | G             | 281 | 0.82 | 0.20 | 3.2E-01 |
| rs6610650 | CYBB    | 23  | 37521454  | A   | 394 | 1.00 | 0.19 | 1.0E+00 | A                        | 292 | 0.83 | 0.24 | 4.4E-01 | A             | 281 | 1.24 | 0.23 | 3.5E-01 |
| rs661148  | GRIA4   | 11  | 105205536 | A   | 394 | 0.85 | 0.22 | 4.5E-01 | A                        | 292 | 0.79 | 0.27 | 3.8E-01 | A             | 281 | 0.85 | 0.28 | 5.6E-01 |
| rs661968  | CHRM5   | 15  | 32048361  | C   | 394 | 1.08 | 0.39 | 8.5E-01 | C                        | 292 | 1.28 | 0.45 | 5.9E-01 | C             | 281 | 0.93 | 0.51 | 8.8E-01 |
| rs6626284 | FMR1    | 23  | 146843578 | C   | 394 | 1.11 | 0.15 | 5.0E-01 | C                        | 292 | 1.19 | 0.18 | 3.3E-01 | C             | 281 | 0.98 | 0.18 | 9.3E-01 |
| rs6630811 | GLRA2   | 23  | 14600626  | G   | 393 | 0.89 | 0.14 | 4.1E-01 | G                        | 291 | 1.01 | 0.17 | 9.5E-01 | G             | 281 | 0.80 | 0.18 | 2.2E-01 |
| rs664367  | MAPK14  | 6   | 36127205  | A   | 394 | 0.86 | 0.14 | 2.8E-01 | A                        | 292 | 0.83 | 0.18 | 2.9E-01 | A             | 281 | 0.88 | 0.18 | 4.9E-01 |
| rs6643915 | HTR2C   | 23  | 114042839 | G   | 394 | 0.82 | 0.20 | 3.2E-01 | G                        | 292 | 0.85 | 0.24 | 5.0E-01 | G             | 281 | 0.76 | 0.26 | 2.8E-01 |
| rs6651806 | MAOB    | 23  | 43573908  | C   | 394 | 0.69 | 0.16 | 1.5E-02 | C                        | 292 | 0.71 | 0.19 | 7.4E-02 | C             | 281 | 0.69 | 0.19 | 5.2E-02 |
| rs665554  | GRIA4   | 11  | 105339382 | G   | 393 | 0.93 | 0.15 | 6.4E-01 | G                        | 291 | 0.96 | 0.18 | 8.1E-01 | G             | 281 | 0.91 | 0.19 | 6.3E-01 |
| rs6656853 | PTGER3  | 1   | 71097887  | T   | 394 | 1.05 | 0.15 | 7.6E-01 | T                        | 292 | 1.10 | 0.18 | 6.2E-01 | T             | 281 | 0.90 | 0.20 | 6.0E-01 |
| rs6657343 | CHRM3   | 1   | 237958134 | T   | 394 | 1.05 | 0.14 | 7.3E-01 | T                        | 292 | 1.14 | 0.17 | 4.6E-01 | T             | 281 | 0.96 | 0.18 | 8.1E-01 |
| rs6661849 | INADL   | 1   | 62277303  | C   | 394 | 1.20 | 0.16 | 2.4E-01 | C                        | 292 | 1.27 | 0.19 | 2.1E-01 | C             | 281 | 1.21 | 0.19 | 3.3E-01 |
| rs6665    | MME     | 3   | 156383899 | C   | 394 | 0.96 | 0.15 | 7.6E-01 | C                        | 292 | 1.07 | 0.19 | 7.2E-01 | C             | 281 | 0.93 | 0.20 | 7.0E-01 |
| rs6669447 | OPRD1   | 1   | 29021948  | C   | 393 | 1.21 | 0.15 | 2.1E-01 | C                        | 291 | 1.19 | 0.19 | 3.5E-01 | C             | 280 | 1.18 | 0.19 | 3.8E-01 |
| rs6672420 | RUNX3   | 1   | 25163597  | A   | 394 | 1.04 | 0.14 | 7.8E-01 | A                        | 292 | 0.85 | 0.17 | 3.5E-01 | A             | 281 | 1.23 | 0.18 | 2.4E-01 |
| rs667282  | CHRNA5  | 15  | 76650527  | C   | 394 | 0.86 | 0.17 | 3.9E-01 | C                        | 292 | 0.86 | 0.21 | 4.9E-01 | C             | 281 | 0.87 | 0.22 | 5.5E-01 |
| rs667791  | ARRB1   | 11  | 74677076  | G   | 394 | 1.01 | 0.16 | 9.4E-01 | G                        | 292 | 1.03 | 0.18 | 8.7E-01 | G             | 281 | 1.02 | 0.19 | 9.2E-01 |
| rs6678136 | RGS4    | 1   | 161303941 | A   | 394 | 1.11 | 0.14 | 4.4E-01 | A                        | 292 | 1.12 | 0.18 | 5.1E-01 | A             | 281 | 1.17 | 0.17 | 3.7E-01 |
| rs668100  | CX3CL1  | 16  | 55965147  | T   | 394 | 0.76 | 0.34 | 4.1E-01 | T                        | 292 | 0.99 | 0.37 | 9.9E-01 | T             | 281 | 0.40 | 0.55 | 9.8E-02 |
| rs6685516 | INADL   | 1   | 62114818  | T   | 394 | 0.92 | 0.18 | 6.5E-01 | T                        | 292 | 0.90 | 0.22 | 6.4E-01 | T             | 281 | 0.94 | 0.23 | 8.1E-01 |
| rs6685551 | INADL   | 1   | 61983069  | A   | 394 | 0.97 | 0.16 | 8.7E-01 | A                        | 292 | 1.02 | 0.19 | 9.2E-01 | A             | 281 | 0.90 | 0.21 | 5.9E-01 |
| rs6685652 | PLA2G4A | 1   | 185098351 | C   | 394 | 0.77 | 0.20 | 2.0E-01 | C                        | 292 | 0.75 | 0.25 | 2.5E-01 | C             | 281 | 0.86 | 0.26 | 5.4E-01 |
| rs6686067 | ATP1A2  | 1   | 158368684 | C   | 393 | 1.14 | 0.21 | 5.2E-01 | C                        | 292 | 1.28 | 0.24 | 3.0E-01 | C             | 280 | 1.02 | 0.26 | 9.3E-01 |
| rs6686510 | ADORA3  | 1   | 111863735 | C   | 394 | 1.16 | 0.15 | 3.1E-01 | C                        | 292 | 1.21 | 0.18 | 2.8E-01 | C             | 281 | 1.06 | 0.18 | 7.5E-01 |
| rs6696406 | PLA2G4A | 1   | 185094740 | G   | 394 | 1.06 | 0.16 | 7.0E-01 | G                        | 292 | 1.07 | 0.18 | 7.1E-01 | G             | 281 | 1.00 | 0.20 | 1.0E+00 |



| SNP       | GENE    | CHR | BP        | TMD |     |      |      |         | TMD with widespread pain |     |      |      |         | Localized TMD |     |      |      |         |
|-----------|---------|-----|-----------|-----|-----|------|------|---------|--------------------------|-----|------|------|---------|---------------|-----|------|------|---------|
|           |         |     |           | A1  | N   | OR   | SE   | P       | A1                       | N   | OR   | SE   | P       | A1            | N   | OR   | SE   | P       |
| rs6698337 | INADL   | 1   | 62110395  | A   | 393 | 0.90 | 0.14 | 4.5E-01 | A                        | 291 | 0.91 | 0.17 | 5.9E-01 | A             | 280 | 0.84 | 0.18 | 3.1E-01 |
| rs6702345 | ADORA1  | 1   | 201332352 | A   | 393 | 0.99 | 0.15 | 9.6E-01 | A                        | 291 | 1.13 | 0.18 | 5.1E-01 | A             | 280 | 0.86 | 0.20 | 4.3E-01 |
| rs6709005 | TRPM8   | 2   | 234493462 | C   | 394 | 0.84 | 0.19 | 3.8E-01 | C                        | 292 | 0.67 | 0.24 | 1.1E-01 | C             | 281 | 1.03 | 0.24 | 8.9E-01 |
| rs6709823 | TRPM8   | 2   | 234541494 | T   | 394 | 1.12 | 0.19 | 5.6E-01 | T                        | 292 | 1.17 | 0.23 | 5.1E-01 | T             | 281 | 1.03 | 0.24 | 9.0E-01 |
| rs6711727 | KCNJ3   | 2   | 155304684 | G   | 394 | 1.17 | 0.14 | 2.8E-01 | G                        | 292 | 1.16 | 0.17 | 3.8E-01 | G             | 281 | 1.16 | 0.18 | 4.3E-01 |
| rs6713532 | POMC    | 2   | 25238337  | C   | 393 | 0.96 | 0.17 | 8.3E-01 | C                        | 292 | 0.92 | 0.21 | 7.0E-01 | C             | 280 | 1.03 | 0.22 | 8.9E-01 |
| rs6715729 | TACR1   | 2   | 75279236  | G   | 394 | 0.88 | 0.14 | 3.5E-01 | G                        | 292 | 0.76 | 0.18 | 1.3E-01 | G             | 281 | 0.96 | 0.18 | 8.1E-01 |
| rs6718709 | AIM     | 2   | 5257953   | G   | 394 | 0.98 | 0.14 | 8.9E-01 | G                        | 292 | 0.89 | 0.17 | 5.0E-01 | G             | 281 | 1.00 | 0.17 | 1.0E+00 |
| rs6722462 | SCN1A   | 2   | 166639772 | C   | 394 | 0.71 | 0.15 | 2.3E-02 | C                        | 292 | 0.71 | 0.19 | 7.0E-02 | C             | 281 | 0.72 | 0.19 | 8.7E-02 |
| rs6723922 | TRPM8   | 2   | 234573235 | C   | 394 | 1.08 | 0.14 | 5.7E-01 | C                        | 292 | 1.06 | 0.17 | 7.3E-01 | C             | 281 | 1.09 | 0.18 | 6.4E-01 |
| rs6730511 | PRKCE   | 2   | 46148353  | A   | 393 | 0.58 | 0.36 | 1.2E-01 | A                        | 291 | 0.36 | 0.51 | 4.5E-02 | A             | 280 | 0.76 | 0.42 | 5.2E-01 |
| rs6733162 | DPP4    | 2   | 162621744 | G   | 393 | 1.32 | 0.15 | 5.7E-02 | G                        | 291 | 1.25 | 0.18 | 2.2E-01 | G             | 280 | 1.47 | 0.18 | 3.6E-02 |
| rs6733391 | XDH     | 2   | 31456808  | A   | 394 | 0.88 | 0.15 | 4.0E-01 | A                        | 292 | 0.84 | 0.19 | 3.4E-01 | A             | 281 | 0.92 | 0.19 | 6.7E-01 |
| rs6740118 | TRPM8   | 2   | 234524845 | T   | 394 | 0.84 | 0.20 | 3.8E-01 | T                        | 292 | 0.76 | 0.25 | 2.7E-01 | T             | 281 | 0.93 | 0.25 | 7.8E-01 |
| rs6741029 | TACR1   | 2   | 75198703  | T   | 394 | 0.88 | 0.15 | 4.1E-01 | T                        | 292 | 0.81 | 0.18 | 2.3E-01 | T             | 281 | 0.91 | 0.19 | 6.3E-01 |
| rs6741949 | DPP4    | 2   | 162618469 | C   | 381 | 1.03 | 0.14 | 8.6E-01 | C                        | 282 | 1.09 | 0.17 | 5.9E-01 | C             | 270 | 0.96 | 0.18 | 8.1E-01 |
| rs6742234 | NTSR2   | 2   | 11715932  | T   | 394 | 0.92 | 0.20 | 6.8E-01 | T                        | 292 | 1.14 | 0.24 | 6.0E-01 | T             | 281 | 0.74 | 0.28 | 2.7E-01 |
| rs6742737 | PRKCE   | 2   | 46151418  | A   | 393 | 1.11 | 0.15 | 4.8E-01 | A                        | 292 | 1.46 | 0.18 | 3.6E-02 | A             | 280 | 0.85 | 0.19 | 3.8E-01 |
| rs6747673 | SCN9A   | 2   | 166853220 | T   | 394 | 0.82 | 0.14 | 1.7E-01 | T                        | 292 | 0.98 | 0.17 | 8.9E-01 | T             | 281 | 0.69 | 0.18 | 4.1E-02 |
| rs675026  | OPRM1   | 6   | 154456256 | A   | 392 | 1.06 | 0.15 | 7.0E-01 | A                        | 290 | 1.10 | 0.19 | 6.1E-01 | A             | 280 | 0.95 | 0.20 | 7.8E-01 |
| rs675091  | GRIA4   | 11  | 105358317 | A   | 392 | 0.93 | 0.17 | 6.9E-01 | A                        | 290 | 0.82 | 0.22 | 3.7E-01 | A             | 279 | 0.99 | 0.21 | 9.4E-01 |
| rs6763211 | SCN11A  | 3   | 38956762  | C   | 394 | 1.23 | 0.23 | 3.6E-01 | C                        | 292 | 1.16 | 0.28 | 5.9E-01 | C             | 281 | 1.41 | 0.28 | 2.3E-01 |
| rs6771157 | SCN10A  | 3   | 38738867  | C   | 394 | 1.12 | 0.17 | 5.0E-01 | C                        | 292 | 1.23 | 0.21 | 3.1E-01 | C             | 281 | 1.05 | 0.21 | 8.4E-01 |
| rs6775197 | SCN10A  | 3   | 38729651  | A   | 394 | 0.39 | 0.60 | 1.1E-01 | A                        | 292 | 0.39 | 0.79 | 2.3E-01 | A             | 281 | 0.44 | 0.79 | 3.0E-01 |
| rs6776510 | SCN11A  | 3   | 38862257  | C   | 392 | 1.03 | 0.14 | 8.3E-01 | C                        | 290 | 0.91 | 0.17 | 5.8E-01 | C             | 280 | 1.08 | 0.18 | 6.8E-01 |
| rs677830  | OPRM1   | 6   | 154470358 | T   | 394 | 1.00 | 0.16 | 1.0E+00 | T                        | 292 | 1.07 | 0.19 | 7.2E-01 | T             | 281 | 0.87 | 0.22 | 5.2E-01 |
| rs6778866 | RAB5A   | 3   | 19971512  | C   | 393 | 0.81 | 0.21 | 3.1E-01 | C                        | 291 | 0.62 | 0.27 | 8.0E-02 | C             | 281 | 1.04 | 0.25 | 8.9E-01 |
| rs6778964 | PRKCD   | 3   | 53183822  | G   | 392 | 0.87 | 0.15 | 3.3E-01 | G                        | 291 | 0.72 | 0.18 | 7.8E-02 | G             | 279 | 1.03 | 0.19 | 8.8E-01 |
| rs6782694 | ATP1B3  | 3   | 143110550 | A   | 394 | 1.17 | 0.20 | 4.3E-01 | A                        | 292 | 0.94 | 0.26 | 8.1E-01 | A             | 281 | 1.34 | 0.23 | 2.1E-01 |
| rs6782922 | SLC6A11 | 3   | 10957301  | T   | 388 | 1.06 | 0.13 | 6.6E-01 | T                        | 289 | 1.18 | 0.16 | 3.2E-01 | T             | 278 | 0.98 | 0.17 | 9.2E-01 |
| rs678354  | NFKBIZ  | 3   | 103055742 | C   | 394 | 0.89 | 0.16 | 4.7E-01 | C                        | 292 | 0.96 | 0.19 | 8.2E-01 | C             | 281 | 0.80 | 0.20 | 2.7E-01 |
| rs6785    | CREB1   | 2   | 208176242 | A   | 394 | 0.90 | 0.19 | 5.6E-01 | A                        | 292 | 0.83 | 0.24 | 4.3E-01 | A             | 281 | 0.92 | 0.24 | 7.4E-01 |
| rs6785846 | AIM     | 3   | 25714245  | T   | 394 | 0.85 | 0.20 | 4.2E-01 | T                        | 292 | 0.90 | 0.24 | 6.6E-01 | T             | 281 | 0.75 | 0.27 | 2.8E-01 |
| rs6786732 | SCN11A  | 3   | 38895207  | C   | 394 | 1.01 | 0.14 | 9.4E-01 | C                        | 292 | 0.87 | 0.17 | 4.3E-01 | C             | 281 | 1.13 | 0.18 | 5.0E-01 |
| rs678849  | OPRD1   | 1   | 29017775  | C   | 394 | 1.08 | 0.14 | 6.1E-01 | C                        | 292 | 1.02 | 0.18 | 9.1E-01 | C             | 281 | 1.07 | 0.18 | 7.3E-01 |
| rs6790692 | AIM     | 3   | 98695905  | T   | 393 | 1.10 | 0.18 | 6.1E-01 | T                        | 292 | 0.79 | 0.24 | 3.1E-01 | T             | 281 | 1.53 | 0.21 | 4.5E-02 |
| rs679832  | AIM     | 18  | 39208685  | C   | 394 | 0.98 | 0.15 | 8.8E-01 | C                        | 292 | 0.93 | 0.18 | 7.0E-01 | C             | 281 | 0.96 | 0.19 | 8.1E-01 |
| rs6800541 | SCN10A  | 3   | 38749836  | C   | 394 | 0.92 | 0.14 | 5.7E-01 | C                        | 292 | 0.83 | 0.18 | 3.0E-01 | C             | 281 | 0.99 | 0.17 | 9.4E-01 |
| rs680109  | GRIA4   | 11  | 105255919 | A   | 390 | 1.02 | 0.15 | 9.2E-01 | A                        | 288 | 1.05 | 0.19 | 8.0E-01 | A             | 278 | 0.96 | 0.19 | 8.1E-01 |

| SNP       | GENE     | CHR | BP        | TMD |     |      |      |         | TMD with widespread pain |     |      |      |         | Localized TMD |     |      |      |         |
|-----------|----------|-----|-----------|-----|-----|------|------|---------|--------------------------|-----|------|------|---------|---------------|-----|------|------|---------|
|           |          |     |           | A1  | N   | OR   | SE   | P       | A1                       | N   | OR   | SE   | P       | A1            | N   | OR   | SE   | P       |
| rs680244  | CHRNA5   | 15  | 76658343  | T   | 394 | 1.01 | 0.14 | 9.4E-01 | T                        | 292 | 1.11 | 0.17 | 5.3E-01 | T             | 281 | 0.89 | 0.18 | 5.3E-01 |
| rs6807916 | CACNA2D2 | 3   | 50507010  | G   | 394 | 1.05 | 0.21 | 8.3E-01 | G                        | 292 | 1.02 | 0.25 | 9.3E-01 | G             | 281 | 1.06 | 0.25 | 8.3E-01 |
| rs6809264 | SCN10A   | 3   | 38775767  | C   | 391 | 1.14 | 0.17 | 4.3E-01 | C                        | 289 | 1.06 | 0.20 | 7.7E-01 | C             | 279 | 1.18 | 0.20 | 4.2E-01 |
| rs6809562 | SLC6A11  | 3   | 10882556  | A   | 394 | 0.69 | 0.26 | 1.6E-01 | A                        | 292 | 0.74 | 0.31 | 3.3E-01 | A             | 281 | 0.65 | 0.34 | 2.2E-01 |
| rs6812058 | GRIA2    | 4   | 158511869 | C   | 393 | 0.83 | 0.16 | 2.3E-01 | C                        | 291 | 0.88 | 0.19 | 5.0E-01 | C             | 280 | 0.82 | 0.19 | 3.0E-01 |
| rs6816610 | GRIA2    | 4   | 158489856 | G   | 384 | 0.86 | 0.15 | 3.3E-01 | G                        | 285 | 0.88 | 0.19 | 5.0E-01 | G             | 274 | 0.88 | 0.19 | 5.0E-01 |
| rs6826912 | PPP3CA   | 4   | 102164162 | G   | 393 | 1.27 | 0.35 | 5.0E-01 | G                        | 291 | 1.12 | 0.47 | 8.2E-01 | G             | 280 | 1.49 | 0.40 | 3.2E-01 |
| rs6837909 | EREG     | 4   | 75459524  | T   | 394 | 1.17 | 0.57 | 7.8E-01 | T                        | 292 | 1.21 | 0.66 | 7.7E-01 | T             | 281 | 1.01 | 0.72 | 9.9E-01 |
| rs684201  | P2RX7    | 12  | 120054726 | A   | 394 | 0.57 | 0.42 | 1.7E-01 | A                        | 292 | 0.46 | 0.56 | 1.6E-01 | A             | 281 | 0.64 | 0.51 | 3.8E-01 |
| rs6844775 | GRIA2    | 4   | 158424988 | C   | 394 | 1.43 | 0.43 | 4.0E-01 | C                        | 292 | 1.48 | 0.49 | 4.2E-01 | C             | 281 | 1.23 | 0.53 | 7.0E-01 |
| rs684513  | CHRNA5   | 15  | 76645455  | G   | 377 | 1.08 | 0.18 | 6.7E-01 | G                        | 277 | 1.09 | 0.22 | 7.1E-01 | G             | 269 | 1.15 | 0.23 | 5.6E-01 |
| rs6847043 | GRIA2    | 4   | 158412885 | C   | 394 | 1.05 | 0.16 | 7.6E-01 | C                        | 292 | 1.06 | 0.19 | 7.5E-01 | C             | 281 | 1.10 | 0.20 | 6.3E-01 |
| rs685019  | P2RX7    | 12  | 120054859 | A   | 386 | 0.90 | 0.17 | 5.1E-01 | A                        | 287 | 0.88 | 0.20 | 5.5E-01 | A             | 274 | 0.97 | 0.21 | 8.9E-01 |
| rs6851231 | PPP3CA   | 4   | 102202630 | G   | 394 | 1.27 | 0.17 | 1.7E-01 | G                        | 292 | 1.02 | 0.22 | 9.1E-01 | G             | 281 | 1.58 | 0.21 | 3.0E-02 |
| rs6851533 | UGT2B7   | 4   | 70013339  | C   | 394 | 0.94 | 0.14 | 6.7E-01 | C                        | 292 | 0.91 | 0.18 | 6.2E-01 | C             | 281 | 1.00 | 0.18 | 9.9E-01 |
| rs6852347 | PPP3CA   | 4   | 102436590 | C   | 394 | 0.80 | 0.15 | 1.4E-01 | C                        | 292 | 0.86 | 0.18 | 4.0E-01 | C             | 281 | 0.74 | 0.19 | 1.3E-01 |
| rs6855973 | GRIA2    | 4   | 158506065 | T   | 394 | 0.93 | 0.19 | 7.0E-01 | T                        | 292 | 0.88 | 0.24 | 5.9E-01 | T             | 281 | 1.01 | 0.24 | 9.5E-01 |
| rs685960  | CHRM3    | 1   | 237991109 | G   | 394 | 0.94 | 0.26 | 8.0E-01 | G                        | 292 | 0.77 | 0.33 | 4.3E-01 | G             | 281 | 1.16 | 0.31 | 6.4E-01 |
| rs686     | DRD1     | 5   | 174801306 | G   | 394 | 0.89 | 0.15 | 4.6E-01 | G                        | 292 | 0.78 | 0.18 | 1.8E-01 | G             | 281 | 0.96 | 0.18 | 8.3E-01 |
| rs6869645 | SLC6A3   | 5   | 1457548   | T   | 394 | 1.16 | 0.32 | 6.4E-01 | T                        | 292 | 0.72 | 0.42 | 4.3E-01 | T             | 281 | 1.57 | 0.36 | 2.1E-01 |
| rs6875225 | CAMK4    | 5   | 110596828 | C   | 393 | 0.99 | 0.14 | 9.5E-01 | C                        | 291 | 1.04 | 0.17 | 8.0E-01 | C             | 280 | 0.96 | 0.18 | 8.1E-01 |
| rs6882041 | GABRB2   | 5   | 160874978 | C   | 394 | 1.16 | 0.16 | 3.5E-01 | C                        | 292 | 1.01 | 0.19 | 9.6E-01 | C             | 281 | 1.33 | 0.20 | 1.6E-01 |
| rs6883553 | CSNK1A1  | 5   | 148905539 | A   | 393 | 1.15 | 0.16 | 4.0E-01 | A                        | 291 | 1.16 | 0.19 | 4.4E-01 | A             | 281 | 1.09 | 0.21 | 6.8E-01 |
| rs6883829 | GABRA6   | 5   | 161055426 | G   | 394 | 0.80 | 0.15 | 1.2E-01 | G                        | 292 | 0.72 | 0.18 | 7.4E-02 | G             | 281 | 0.90 | 0.19 | 5.9E-01 |
| rs6884129 | ADRA1B   | 5   | 159311160 | C   | 393 | 0.94 | 0.23 | 8.0E-01 | C                        | 291 | 0.76 | 0.30 | 3.7E-01 | C             | 280 | 1.21 | 0.28 | 4.9E-01 |
| rs6892282 | ADRA1B   | 5   | 159293063 | T   | 394 | 1.04 | 0.14 | 7.7E-01 | T                        | 292 | 1.02 | 0.18 | 9.3E-01 | T             | 281 | 1.08 | 0.19 | 6.8E-01 |
| rs690158  | HSPA9    | 5   | 137940590 | C   | 394 | 0.54 | 0.38 | 1.1E-01 | C                        | 292 | 0.42 | 0.52 | 9.6E-02 | C             | 281 | 0.68 | 0.46 | 4.1E-01 |
| rs6912029 | OPRM1    | 6   | 154402201 | T   | 393 | 0.64 | 0.36 | 2.2E-01 | T                        | 291 | 0.42 | 0.52 | 9.4E-02 | T             | 280 | 0.80 | 0.42 | 6.0E-01 |
| rs6912184 | ESR1     | 6   | 152301899 | G   | 394 | 0.91 | 0.17 | 6.0E-01 | G                        | 292 | 0.82 | 0.22 | 3.6E-01 | G             | 281 | 0.98 | 0.22 | 9.4E-01 |
| rs6914239 | GRM1     | 6   | 146617363 | C   | 394 | 1.16 | 0.31 | 6.4E-01 | C                        | 292 | 1.34 | 0.36 | 4.2E-01 | C             | 281 | 0.96 | 0.41 | 9.2E-01 |
| rs6915189 | EZR      | 6   | 159138831 | G   | 394 | 0.92 | 0.14 | 5.3E-01 | G                        | 292 | 0.93 | 0.18 | 6.9E-01 | G             | 281 | 0.92 | 0.17 | 6.4E-01 |
| rs6923492 | GRM1     | 6   | 146797017 | T   | 386 | 0.95 | 0.14 | 6.9E-01 | T                        | 286 | 0.91 | 0.17 | 5.9E-01 | T             | 273 | 1.02 | 0.17 | 9.1E-01 |
| rs6926750 | ESR1     | 6   | 152194681 | G   | 392 | 0.78 | 0.19 | 2.0E-01 | G                        | 290 | 0.69 | 0.24 | 1.4E-01 | G             | 279 | 0.97 | 0.23 | 8.8E-01 |
| rs6926774 | AIM      | 6   | 5677819   | G   | 393 | 1.00 | 0.15 | 9.9E-01 | G                        | 291 | 1.04 | 0.17 | 8.1E-01 | G             | 280 | 0.94 | 0.18 | 7.5E-01 |
| rs6927652 | PACSN1   | 6   | 34541488  | T   | 388 | 1.20 | 0.14 | 2.0E-01 | T                        | 287 | 1.12 | 0.17 | 5.1E-01 | T             | 279 | 1.31 | 0.18 | 1.3E-01 |
| rs692780  | CHRNA5   | 15  | 76663560  | C   | 394 | 1.02 | 0.14 | 8.9E-01 | C                        | 292 | 1.15 | 0.17 | 4.0E-01 | C             | 281 | 0.89 | 0.19 | 5.2E-01 |
| rs6928    | MAPK1    | 22  | 20445004  | C   | 394 | 0.89 | 0.14 | 4.1E-01 | C                        | 292 | 1.12 | 0.17 | 4.9E-01 | C             | 281 | 0.70 | 0.18 | 4.8E-02 |
| rs692995  | SCN1A    | 2   | 166594195 | G   | 394 | 2.02 | 0.39 | 7.0E-02 | G                        | 292 | 1.52 | 0.47 | 3.7E-01 | G             | 281 | 2.38 | 0.44 | 4.8E-02 |
| rs693534  | NOS1     | 12  | 116269101 | A   | 394 | 0.87 | 0.14 | 3.5E-01 | A                        | 292 | 0.71 | 0.18 | 5.7E-02 | A             | 281 | 1.02 | 0.18 | 9.2E-01 |

| SNP       | GENE     | CHR | BP        | TMD |     |      |      |         | TMD with widespread pain |     |      |      |         | Localized TMD |     |      |      |         |
|-----------|----------|-----|-----------|-----|-----|------|------|---------|--------------------------|-----|------|------|---------|---------------|-----|------|------|---------|
|           |          |     |           | A1  | N   | OR   | SE   | P       | A1                       | N   | OR   | SE   | P       | A1            | N   | OR   | SE   | P       |
| rs693955  | SLC29A1  | 6   | 44299898  | A   | 391 | 1.43 | 0.18 | 5.3E-02 | A                        | 290 | 1.25 | 0.23 | 3.2E-01 | A             | 278 | 1.59 | 0.22 | 3.4E-02 |
| rs694066  | GAL      | 11  | 68209561  | A   | 394 | 0.97 | 0.27 | 8.9E-01 | A                        | 292 | 0.89 | 0.33 | 7.2E-01 | A             | 281 | 1.01 | 0.34 | 9.7E-01 |
| rs6946119 | ABCB1    | 7   | 86966801  | C   | 394 | 1.21 | 0.16 | 2.5E-01 | C                        | 292 | 1.24 | 0.19 | 2.7E-01 | C             | 281 | 1.10 | 0.21 | 6.4E-01 |
| rs6955490 | AIM      | 7   | 98812524  | A   | 394 | 1.39 | 0.23 | 1.5E-01 | A                        | 292 | 1.60 | 0.27 | 8.4E-02 | A             | 281 | 1.29 | 0.28 | 3.7E-01 |
| rs6957496 | CHRM2    | 7   | 136202377 | G   | 394 | 0.92 | 0.24 | 7.2E-01 | G                        | 292 | 0.75 | 0.30 | 3.4E-01 | G             | 281 | 1.01 | 0.29 | 9.7E-01 |
| rs696     | NFKBIA   | 14  | 34940844  | T   | 394 | 0.91 | 0.15 | 5.4E-01 | T                        | 292 | 0.78 | 0.19 | 1.9E-01 | T             | 281 | 1.15 | 0.19 | 4.7E-01 |
| rs696092  | CALCRL   | 2   | 187918459 | G   | 394 | 0.87 | 0.15 | 3.3E-01 | G                        | 292 | 0.79 | 0.18 | 1.9E-01 | G             | 281 | 0.98 | 0.18 | 9.2E-01 |
| rs6962696 | CAMK2B   | 7   | 44335590  | A   | 393 | 1.44 | 0.21 | 7.8E-02 | A                        | 291 | 1.48 | 0.25 | 1.1E-01 | A             | 281 | 1.31 | 0.25 | 2.8E-01 |
| rs6967334 | CACNA2D1 | 7   | 81899704  | C   | 394 | 0.81 | 0.15 | 1.5E-01 | C                        | 292 | 0.74 | 0.17 | 8.5E-02 | C             | 281 | 0.83 | 0.18 | 2.9E-01 |
| rs6967593 | IFRD1    | 7   | 111884028 | C   | 394 | 1.11 | 0.15 | 4.6E-01 | C                        | 292 | 1.12 | 0.18 | 5.3E-01 | C             | 281 | 1.19 | 0.18 | 3.4E-01 |
| rs6975647 | CACNA2D1 | 7   | 81894544  | G   | 394 | 1.19 | 0.15 | 2.4E-01 | G                        | 292 | 1.25 | 0.17 | 1.9E-01 | G             | 281 | 1.10 | 0.18 | 5.9E-01 |
| rs6989854 | ADRA1A   | 8   | 26692842  | C   | 394 | 0.89 | 0.15 | 4.3E-01 | C                        | 292 | 0.83 | 0.17 | 2.8E-01 | C             | 281 | 0.95 | 0.18 | 7.9E-01 |
| rs6991838 | AIM      | 8   | 66633516  | G   | 394 | 0.68 | 0.15 | 8.2E-03 | G                        | 292 | 0.69 | 0.18 | 3.6E-02 | G             | 281 | 0.67 | 0.18 | 2.9E-02 |
| rs6992006 | STAU2    | 8   | 74737928  | T   | 394 | 1.43 | 0.28 | 2.1E-01 | T                        | 292 | 1.37 | 0.35 | 3.7E-01 | T             | 281 | 1.64 | 0.34 | 1.5E-01 |
| rs6992642 | NRG1     | 8   | 32743929  | C   | 394 | 1.00 | 0.14 | 1.0E+00 | C                        | 292 | 1.04 | 0.18 | 8.1E-01 | C             | 281 | 0.89 | 0.18 | 5.3E-01 |
| rs6995579 | STAU2    | 8   | 74807188  | T   | 393 | 0.89 | 0.21 | 5.8E-01 | T                        | 291 | 0.95 | 0.25 | 8.5E-01 | T             | 280 | 0.82 | 0.28 | 4.9E-01 |
| rs7005606 | NRG1     | 8   | 32521043  | G   | 394 | 1.14 | 0.14 | 3.6E-01 | G                        | 292 | 0.99 | 0.17 | 9.4E-01 | G             | 281 | 1.28 | 0.18 | 1.7E-01 |
| rs7007436 | NRG1     | 8   | 32721934  | G   | 392 | 1.00 | 0.16 | 1.0E+00 | G                        | 290 | 1.20 | 0.18 | 3.3E-01 | G             | 280 | 0.78 | 0.21 | 2.4E-01 |
| rs701265  | P2RY1    | 3   | 154037047 | G   | 394 | 1.04 | 0.19 | 8.5E-01 | G                        | 292 | 1.08 | 0.23 | 7.4E-01 | G             | 281 | 1.03 | 0.24 | 8.9E-01 |
| rs701492  | GAD1     | 2   | 171410726 | T   | 394 | 1.13 | 0.15 | 4.4E-01 | T                        | 292 | 1.05 | 0.19 | 8.0E-01 | T             | 281 | 1.34 | 0.20 | 1.4E-01 |
| rs7015090 | STAU2    | 8   | 74703772  | A   | 394 | 1.24 | 0.30 | 4.6E-01 | A                        | 292 | 1.24 | 0.35 | 5.3E-01 | A             | 281 | 1.11 | 0.37 | 7.8E-01 |
| rs7015100 | IKBKB    | 8   | 42240133  | C   | 394 | 1.60 | 0.37 | 2.1E-01 | C                        | 292 | 1.28 | 0.45 | 5.9E-01 | C             | 281 | 1.81 | 0.43 | 1.7E-01 |
| rs7020345 | GABBR2   | 9   | 100208398 | G   | 394 | 0.99 | 0.17 | 9.3E-01 | G                        | 292 | 0.98 | 0.20 | 9.2E-01 | G             | 281 | 0.92 | 0.23 | 7.1E-01 |
| rs702859  | KCNJ6    | 21  | 37919571  | G   | 394 | 0.92 | 0.15 | 5.6E-01 | G                        | 292 | 0.89 | 0.18 | 5.2E-01 | G             | 281 | 1.03 | 0.19 | 8.8E-01 |
| rs7041374 | MPDZ     | 9   | 13243913  | G   | 394 | 1.08 | 0.16 | 6.3E-01 | G                        | 292 | 1.34 | 0.19 | 1.3E-01 | G             | 281 | 0.80 | 0.22 | 3.2E-01 |
| rs706150  | AKR1B10  | 7   | 133880347 | T   | 392 | 2.04 | 0.62 | 2.5E-01 | T                        | 291 | 3.76 | 0.72 | 6.5E-02 | T             | 279 | 1.36 | 0.92 | 7.4E-01 |
| rs706160  | AKR1B10  | 7   | 133871137 | A   | 393 | 0.85 | 0.14 | 2.6E-01 | A                        | 291 | 1.03 | 0.17 | 8.6E-01 | A             | 280 | 0.70 | 0.18 | 5.0E-02 |
| rs706793  | ACCN2    | 12  | 48754036  | A   | 394 | 1.03 | 0.15 | 8.3E-01 | A                        | 292 | 1.14 | 0.17 | 4.4E-01 | A             | 281 | 0.87 | 0.19 | 4.4E-01 |
| rs707176  | GRIA1    | 5   | 153010153 | C   | 394 | 0.90 | 0.15 | 4.9E-01 | C                        | 292 | 0.91 | 0.19 | 6.1E-01 | C             | 281 | 0.91 | 0.20 | 6.2E-01 |
| rs7079    | AGT      | 1   | 228904954 | T   | 394 | 1.07 | 0.16 | 6.9E-01 | T                        | 292 | 1.02 | 0.19 | 9.1E-01 | T             | 281 | 1.02 | 0.20 | 9.4E-01 |
| rs7083450 | PITX3    | 10  | 103974050 | C   | 393 | 0.99 | 0.20 | 9.8E-01 | C                        | 291 | 0.78 | 0.27 | 3.5E-01 | C             | 280 | 1.27 | 0.25 | 3.4E-01 |
| rs709024  | ADRA1D   | 20  | 4149984   | T   | 392 | 0.98 | 0.14 | 8.7E-01 | T                        | 291 | 1.06 | 0.17 | 7.2E-01 | T             | 280 | 0.96 | 0.18 | 8.2E-01 |
| rs7093673 | GRK5     | 10  | 120972346 | T   | 392 | 0.75 | 0.15 | 6.0E-02 | T                        | 290 | 0.73 | 0.18 | 9.1E-02 | T             | 280 | 0.76 | 0.19 | 1.6E-01 |
| rs7095989 | GRK5     | 10  | 121015087 | C   | 394 | 1.23 | 0.14 | 1.5E-01 | C                        | 292 | 1.41 | 0.18 | 5.0E-02 | C             | 281 | 1.09 | 0.18 | 6.5E-01 |
| rs7101022 | GRK5     | 10  | 121111158 | A   | 390 | 1.19 | 0.17 | 3.1E-01 | A                        | 289 | 1.35 | 0.20 | 1.4E-01 | A             | 278 | 1.03 | 0.22 | 8.9E-01 |
| rs7103411 | BDNF     | 11  | 27656701  | C   | 394 | 0.91 | 0.17 | 6.0E-01 | C                        | 292 | 0.96 | 0.20 | 8.6E-01 | C             | 281 | 0.89 | 0.22 | 6.0E-01 |
| rs7103572 | HTR3B    | 11  | 113295309 | T   | 393 | 1.11 | 0.16 | 5.4E-01 | T                        | 291 | 1.06 | 0.20 | 7.8E-01 | T             | 281 | 1.14 | 0.21 | 5.3E-01 |
| rs7103679 | DRD2     | 11  | 112808884 | T   | 394 | 1.11 | 0.21 | 6.0E-01 | T                        | 292 | 0.89 | 0.26 | 6.5E-01 | T             | 281 | 1.36 | 0.25 | 2.2E-01 |
| rs7104301 | CAT      | 11  | 34450214  | G   | 394 | 0.92 | 0.16 | 6.3E-01 | G                        | 292 | 0.93 | 0.20 | 7.2E-01 | G             | 281 | 0.92 | 0.20 | 7.0E-01 |

| SNP       | GENE      | CHR | BP        | TMD |     |      |      |         | TMD with widespread pain |     |      |      |         | Localized TMD |     |      |      |         |
|-----------|-----------|-----|-----------|-----|-----|------|------|---------|--------------------------|-----|------|------|---------|---------------|-----|------|------|---------|
|           |           |     |           | A1  | N   | OR   | SE   | P       | A1                       | N   | OR   | SE   | P       | A1            | N   | OR   | SE   | P       |
| rs7106462 | P2RX3     | 11  | 56856927  | A   | 393 | 1.31 | 0.19 | 1.5E-01 | A                        | 291 | 1.42 | 0.23 | 1.3E-01 | A             | 280 | 1.36 | 0.23 | 1.8E-01 |
| rs7111159 | AIM       | 12  | 78632547  | T   | 394 | 0.53 | 0.52 | 2.2E-01 | T                        | 292 | 0.32 | 0.78 | 1.4E-01 | T             | 281 | 0.72 | 0.60 | 5.9E-01 |
| rs7118824 | KCNJ5     | 11  | 128287188 | T   | 394 | 0.82 | 0.18 | 2.8E-01 | T                        | 292 | 0.80 | 0.22 | 3.2E-01 | T             | 281 | 0.77 | 0.23 | 2.6E-01 |
| rs7124442 | BDNF      | 11  | 27633617  | C   | 394 | 1.51 | 0.17 | 1.3E-02 | C                        | 292 | 1.29 | 0.19 | 1.9E-01 | C             | 281 | 1.87 | 0.21 | 2.7E-03 |
| rs7124769 | GRIA4     | 11  | 105174696 | A   | 392 | 0.32 | 0.59 | 5.0E-02 | A                        | 290 | 0.64 | 0.60 | 4.5E-01 | A             | 279 | 0.00 | #### | 1.0E+00 |
| rs7127013 | P2RY6     | 11  | 72676869  | A   | 393 | 0.95 | 0.20 | 8.2E-01 | A                        | 291 | 1.17 | 0.24 | 5.3E-01 | A             | 280 | 0.91 | 0.27 | 7.4E-01 |
| rs7127461 | ARRB1     | 11  | 74710166  | C   | 394 | 1.43 | 0.15 | 1.8E-02 | C                        | 292 | 1.39 | 0.18 | 7.4E-02 | C             | 281 | 1.42 | 0.18 | 5.7E-02 |
| rs7129581 | RBMXL2    | 11  | 7063468   | C   | 394 | 0.96 | 0.21 | 8.3E-01 | C                        | 292 | 0.92 | 0.25 | 7.3E-01 | C             | 281 | 0.95 | 0.26 | 8.3E-01 |
| rs7142517 | GCH1      | 14  | 54376554  | A   | 394 | 1.11 | 0.15 | 5.0E-01 | A                        | 292 | 1.17 | 0.18 | 3.8E-01 | A             | 281 | 1.02 | 0.19 | 9.3E-01 |
| rs7154455 | ESR2      | 14  | 63806413  | C   | 394 | 0.90 | 0.15 | 4.9E-01 | C                        | 292 | 1.10 | 0.19 | 6.2E-01 | C             | 281 | 0.78 | 0.19 | 2.0E-01 |
| rs7154546 | PRKD1     | 14  | 29349734  | A   | 394 | 1.02 | 0.18 | 9.3E-01 | A                        | 292 | 1.15 | 0.21 | 5.0E-01 | A             | 281 | 0.88 | 0.23 | 5.8E-01 |
| rs7156359 | PRKD1     | 14  | 29243196  | C   | 394 | 0.98 | 0.14 | 8.8E-01 | C                        | 292 | 1.04 | 0.18 | 8.4E-01 | C             | 281 | 0.88 | 0.19 | 4.9E-01 |
| rs7158302 | AIM       | 14  | 56720501  | C   | 394 | 1.25 | 0.22 | 3.2E-01 | C                        | 292 | 1.17 | 0.26 | 5.5E-01 | C             | 281 | 1.27 | 0.27 | 3.8E-01 |
| rs716009  | STAU2     | 8   | 74665463  | C   | 394 | 0.92 | 0.17 | 6.2E-01 | C                        | 292 | 0.99 | 0.19 | 9.4E-01 | C             | 281 | 0.78 | 0.22 | 2.5E-01 |
| rs7162014 | GABRG3    | 15  | 25436553  | A   | 394 | 1.05 | 0.14 | 7.3E-01 | A                        | 292 | 1.10 | 0.17 | 5.5E-01 | A             | 281 | 1.00 | 0.18 | 1.0E+00 |
| rs7163836 | ANXA2     | 15  | 58427520  | T   | 394 | 1.02 | 0.14 | 8.9E-01 | T                        | 292 | 0.88 | 0.18 | 4.7E-01 | T             | 281 | 1.21 | 0.18 | 2.8E-01 |
| rs716518  | GRIA1     | 5   | 152920649 | G   | 392 | 2.25 | 0.55 | 1.4E-01 | G                        | 290 | 2.61 | 0.60 | 1.1E-01 | G             | 279 | 1.63 | 0.68 | 4.8E-01 |
| rs7166547 | MAP2K1    | 15  | 64471444  | T   | 394 | 0.74 | 0.19 | 1.1E-01 | T                        | 292 | 0.82 | 0.23 | 3.8E-01 | T             | 281 | 0.66 | 0.25 | 9.8E-02 |
| rs7170421 | ANXA2     | 15  | 58421438  | C   | 394 | 0.91 | 0.15 | 5.5E-01 | C                        | 292 | 1.00 | 0.18 | 9.9E-01 | C             | 281 | 0.78 | 0.20 | 2.1E-01 |
| rs7173713 | GABRB3    | 15  | 24437247  | T   | 394 | 0.94 | 0.21 | 7.5E-01 | T                        | 292 | 0.98 | 0.26 | 9.3E-01 | T             | 281 | 1.06 | 0.26 | 8.2E-01 |
| rs7176429 | NTRK3     | 15  | 86220428  | T   | 394 | 1.35 | 0.15 | 4.9E-02 | T                        | 292 | 1.46 | 0.18 | 3.8E-02 | T             | 281 | 1.31 | 0.20 | 1.6E-01 |
| rs717700  | GRIN2B    | 12  | 13996048  | T   | 394 | 0.79 | 0.49 | 6.3E-01 | T                        | 292 | 0.80 | 0.61 | 7.1E-01 | T             | 281 | 0.89 | 0.61 | 8.6E-01 |
| rs7177870 | GABRG3    | 15  | 24862190  | T   | 393 | 0.83 | 0.14 | 2.0E-01 | T                        | 291 | 0.75 | 0.17 | 9.6E-02 | T             | 280 | 0.89 | 0.18 | 5.1E-01 |
| rs718163  | ADRBK2    | 22  | 24411873  | T   | 394 | 0.81 | 0.14 | 1.3E-01 | T                        | 292 | 0.70 | 0.18 | 5.3E-02 | T             | 281 | 0.95 | 0.18 | 7.9E-01 |
| rs7191944 | MC1R      | 16  | 88521379  | G   | 394 | 0.82 | 0.16 | 2.3E-01 | G                        | 292 | 0.77 | 0.20 | 1.9E-01 | G             | 281 | 0.87 | 0.20 | 4.8E-01 |
| rs7194256 | SLC6A2    | 16  | 54295192  | T   | 394 | 1.04 | 0.20 | 8.4E-01 | T                        | 292 | 0.94 | 0.25 | 8.1E-01 | T             | 281 | 1.16 | 0.24 | 5.4E-01 |
| rs7201574 | GRIN2A    | 16  | 10010559  | G   | 394 | 0.90 | 0.19 | 5.8E-01 | G                        | 292 | 0.99 | 0.22 | 9.7E-01 | G             | 281 | 0.80 | 0.24 | 3.4E-01 |
| rs7208718 | TRPV2     | 17  | 16279864  | T   | 386 | 1.10 | 0.15 | 5.4E-01 | T                        | 286 | 1.13 | 0.19 | 5.1E-01 | T             | 273 | 1.09 | 0.19 | 6.6E-01 |
| rs7209436 | CRHR1     | 17  | 41225913  | T   | 393 | 1.00 | 0.14 | 1.0E+00 | T                        | 291 | 0.96 | 0.17 | 8.3E-01 | T             | 281 | 0.97 | 0.18 | 8.5E-01 |
| rs7214319 | ACCN1     | 17  | 28501067  | G   | 392 | 1.05 | 0.15 | 7.6E-01 | G                        | 290 | 0.94 | 0.19 | 7.5E-01 | G             | 280 | 1.22 | 0.19 | 2.7E-01 |
| rs7216486 | TRPV3     | 17  | 3368782   | G   | 393 | 0.98 | 0.15 | 8.8E-01 | G                        | 291 | 1.04 | 0.18 | 8.2E-01 | G             | 281 | 0.95 | 0.18 | 7.6E-01 |
| rs7219780 | TRPV3     | 17  | 3365304   | T   | 394 | 0.89 | 0.14 | 4.0E-01 | T                        | 292 | 0.88 | 0.17 | 4.5E-01 | T             | 281 | 0.90 | 0.18 | 5.5E-01 |
| rs722651  | MPDZ      | 9   | 13096335  | A   | 394 | 1.10 | 0.14 | 5.2E-01 | A                        | 292 | 1.21 | 0.18 | 2.8E-01 | A             | 281 | 0.98 | 0.19 | 9.2E-01 |
| rs722915  | ADORA1    | 1   | 201354280 | T   | 393 | 0.97 | 0.15 | 8.6E-01 | T                        | 291 | 1.05 | 0.19 | 8.0E-01 | T             | 281 | 0.92 | 0.19 | 6.7E-01 |
| rs724118  | CACNA2D1  | 7   | 81822040  | A   | 394 | 0.94 | 0.15 | 7.0E-01 | A                        | 292 | 0.91 | 0.19 | 6.2E-01 | A             | 281 | 0.98 | 0.19 | 9.1E-01 |
| rs7248    | GABARAPL1 | 12  | 10266569  | C   | 388 | 0.70 | 0.20 | 6.8E-02 | C                        | 288 | 0.80 | 0.24 | 3.5E-01 | C             | 276 | 0.65 | 0.26 | 9.5E-02 |
| rs7251403 | CACNA1A   | 19  | 13237313  | C   | 394 | 0.99 | 0.14 | 9.4E-01 | C                        | 292 | 1.02 | 0.18 | 9.2E-01 | C             | 281 | 1.00 | 0.18 | 9.9E-01 |
| rs726281  | ESR1      | 6   | 152344271 | G   | 386 | 0.93 | 0.17 | 6.7E-01 | G                        | 287 | 0.80 | 0.20 | 2.6E-01 | G             | 275 | 1.04 | 0.20 | 8.3E-01 |
| rs7271530 | OPRL1     | 20  | 62198359  | T   | 391 | 0.96 | 0.15 | 7.6E-01 | T                        | 290 | 0.99 | 0.17 | 9.5E-01 | T             | 279 | 0.88 | 0.20 | 5.1E-01 |

| SNP       | GENE     | CHR | BP        | TMD |     |      |      |         | TMD with widespread pain |     |      |      |         | Localized TMD |     |      |      |         |
|-----------|----------|-----|-----------|-----|-----|------|------|---------|--------------------------|-----|------|------|---------|---------------|-----|------|------|---------|
|           |          |     |           | A1  | N   | OR   | SE   | P       | A1                       | N   | OR   | SE   | P       | A1            | N   | OR   | SE   | P       |
| rs7272164 | STAU1    | 20  | 47199604  | C   | 394 | 1.05 | 0.15 | 7.6E-01 | C                        | 292 | 1.22 | 0.18 | 2.9E-01 | C             | 281 | 0.92 | 0.19 | 6.8E-01 |
| rs727422  | SC5DL    | 11  | 120673388 | A   | 394 | 1.94 | 0.29 | 2.2E-02 | A                        | 292 | 1.74 | 0.34 | 1.0E-01 | A             | 281 | 2.04 | 0.35 | 4.0E-02 |
| rs727605  | GRIN2A   | 16  | 9863065   | T   | 393 | 1.06 | 0.16 | 7.2E-01 | T                        | 291 | 1.06 | 0.19 | 7.5E-01 | T             | 281 | 1.10 | 0.19 | 6.4E-01 |
| rs728273  | IFRD1    | 7   | 111855337 | G   | 394 | 1.38 | 0.15 | 2.7E-02 | G                        | 292 | 1.73 | 0.18 | 2.2E-03 | G             | 281 | 1.17 | 0.19 | 4.0E-01 |
| rs7289981 | CSNK1E   | 22  | 37049908  | T   | 393 | 0.88 | 0.22 | 5.6E-01 | T                        | 291 | 1.44 | 0.25 | 1.5E-01 | T             | 280 | 0.37 | 0.37 | 7.5E-03 |
| rs729229  | ADCY7    | 16  | 48890878  | A   | 381 | 1.28 | 0.18 | 1.7E-01 | A                        | 280 | 1.37 | 0.21 | 1.3E-01 | A             | 272 | 1.13 | 0.23 | 5.8E-01 |
| rs7292634 | ADRBK2   | 22  | 24399727  | T   | 394 | 0.90 | 0.26 | 6.9E-01 | T                        | 292 | 0.63 | 0.36 | 2.0E-01 | T             | 281 | 1.11 | 0.30 | 7.3E-01 |
| rs729372  | PRKACA   | 19  | 14088928  | T   | 379 | 0.78 | 0.24 | 3.0E-01 | T                        | 281 | 0.82 | 0.29 | 4.9E-01 | T             | 270 | 0.78 | 0.30 | 4.2E-01 |
| rs7299582 | TPH2     | 12  | 70642581  | G   | 394 | 0.75 | 0.22 | 1.9E-01 | G                        | 292 | 0.67 | 0.28 | 1.6E-01 | G             | 281 | 0.86 | 0.27 | 5.7E-01 |
| rs730092  | DDC      | 7   | 50503248  | C   | 392 | 1.05 | 0.15 | 7.6E-01 | C                        | 290 | 1.09 | 0.18 | 6.4E-01 | C             | 280 | 1.01 | 0.19 | 9.6E-01 |
| rs7315855 | TPH2     | 12  | 70709537  | A   | 394 | 0.87 | 0.37 | 7.1E-01 | A                        | 292 | 0.79 | 0.45 | 6.1E-01 | A             | 281 | 0.88 | 0.45 | 7.9E-01 |
| rs732072  | RELA     | 11  | 65184144  | A   | 393 | 1.60 | 0.27 | 7.8E-02 | A                        | 291 | 1.31 | 0.31 | 3.9E-01 | A             | 280 | 1.88 | 0.31 | 4.3E-02 |
| rs7322914 | EFNB2    | 13  | 105938911 | T   | 392 | 0.94 | 0.15 | 6.8E-01 | T                        | 290 | 1.06 | 0.18 | 7.6E-01 | T             | 279 | 0.83 | 0.20 | 3.3E-01 |
| rs733370  | AIM      | 4   | 6010036   | A   | 394 | 1.26 | 0.15 | 1.2E-01 | A                        | 292 | 1.32 | 0.18 | 1.3E-01 | A             | 281 | 1.21 | 0.19 | 3.2E-01 |
| rs7341478 | CACNA2D1 | 7   | 81592385  | A   | 393 | 0.92 | 0.16 | 5.9E-01 | A                        | 291 | 1.00 | 0.20 | 9.8E-01 | A             | 280 | 0.84 | 0.21 | 4.0E-01 |
| rs734290  | ADRA1D   | 20  | 4148595   | T   | 392 | 1.23 | 0.18 | 2.5E-01 | T                        | 290 | 1.36 | 0.21 | 1.5E-01 | T             | 280 | 1.12 | 0.23 | 6.2E-01 |
| rs735112  | PRKCE    | 2   | 45963929  | G   | 392 | 1.05 | 0.15 | 7.7E-01 | G                        | 290 | 0.97 | 0.19 | 8.7E-01 | G             | 279 | 1.11 | 0.19 | 5.7E-01 |
| rs735555  | CDK5     | 17  | 27841563  | T   | 394 | 1.01 | 0.14 | 9.4E-01 | T                        | 292 | 0.97 | 0.16 | 8.7E-01 | T             | 281 | 1.09 | 0.17 | 6.2E-01 |
| rs736471  | CACNA2D2 | 3   | 50494396  | T   | 381 | 0.81 | 0.14 | 1.4E-01 | T                        | 282 | 0.92 | 0.17 | 6.5E-01 | T             | 270 | 0.70 | 0.18 | 5.0E-02 |
| rs7373686 | SCN5A    | 3   | 38669265  | G   | 393 | 0.99 | 0.19 | 9.7E-01 | G                        | 291 | 0.84 | 0.24 | 4.8E-01 | G             | 280 | 1.12 | 0.23 | 6.2E-01 |
| rs737865  | COMT     | 22  | 18310121  | G   | 393 | 1.08 | 0.15 | 6.3E-01 | G                        | 291 | 1.11 | 0.18 | 5.8E-01 | G             | 280 | 1.09 | 0.18 | 6.4E-01 |
| rs7403021 | GABRG3   | 15  | 24798408  | T   | 394 | 1.06 | 0.24 | 8.1E-01 | T                        | 292 | 1.13 | 0.30 | 6.7E-01 | T             | 281 | 1.01 | 0.32 | 9.7E-01 |
| rs740884  | GABBR1   | 6   | 29682610  | T   | 392 | 0.94 | 0.36 | 8.6E-01 | T                        | 291 | 0.83 | 0.45 | 6.8E-01 | T             | 279 | 0.95 | 0.45 | 9.1E-01 |
| rs741327  | GRIN2B   | 12  | 13768808  | A   | 394 | 0.74 | 0.16 | 6.7E-02 | A                        | 292 | 0.65 | 0.20 | 3.3E-02 | A             | 281 | 0.88 | 0.20 | 5.1E-01 |
| rs7418709 | INADL    | 1   | 62352495  | T   | 393 | 0.74 | 0.26 | 2.6E-01 | T                        | 292 | 0.73 | 0.32 | 3.1E-01 | T             | 280 | 0.70 | 0.34 | 2.9E-01 |
| rs742086  | CYP2D6   | 22  | 40882197  | G   | 394 | 0.72 | 0.15 | 3.3E-02 | G                        | 292 | 0.52 | 0.20 | 1.1E-03 | G             | 281 | 0.94 | 0.19 | 7.3E-01 |
| rs7430    | PPP3CC   | 8   | 22454359  | C   | 393 | 0.97 | 0.14 | 8.2E-01 | C                        | 291 | 1.05 | 0.17 | 8.0E-01 | C             | 281 | 0.88 | 0.18 | 4.6E-01 |
| rs7431144 | SCN10A   | 3   | 38769272  | C   | 394 | 1.00 | 0.24 | 1.0E+00 | C                        | 292 | 1.07 | 0.29 | 8.2E-01 | C             | 281 | 1.01 | 0.31 | 9.7E-01 |
| rs7434444 | ADRA2C   | 4   | 3739867   | C   | 388 | 1.41 | 0.17 | 3.6E-02 | C                        | 286 | 1.42 | 0.20 | 7.5E-02 | C             | 275 | 1.26 | 0.20 | 2.5E-01 |
| rs743507  | NOS3     | 7   | 150338421 | C   | 375 | 1.06 | 0.16 | 7.3E-01 | C                        | 281 | 1.02 | 0.20 | 9.1E-01 | C             | 265 | 1.02 | 0.21 | 9.4E-01 |
| rs743535  | CYP2E1   | 10  | 135199357 | A   | 393 | 1.39 | 0.23 | 1.5E-01 | A                        | 291 | 1.77 | 0.26 | 3.1E-02 | A             | 280 | 1.10 | 0.29 | 7.5E-01 |
| rs744893  | EZR      | 6   | 159122228 | C   | 394 | 1.08 | 0.16 | 6.2E-01 | C                        | 292 | 1.20 | 0.20 | 3.6E-01 | C             | 281 | 1.03 | 0.21 | 9.0E-01 |
| rs744993  | NTRK3    | 15  | 86604269  | A   | 394 | 0.85 | 0.20 | 4.3E-01 | A                        | 292 | 0.62 | 0.27 | 7.2E-02 | A             | 281 | 1.07 | 0.23 | 7.8E-01 |
| rs744994  | NTRK3    | 15  | 86603939  | A   | 393 | 0.76 | 0.15 | 6.8E-02 | A                        | 291 | 0.67 | 0.19 | 3.1E-02 | A             | 281 | 0.87 | 0.18 | 4.5E-01 |
| rs748008  | GRIA4    | 11  | 105165230 | T   | 388 | 0.78 | 0.15 | 1.1E-01 | T                        | 286 | 0.84 | 0.19 | 3.5E-01 | T             | 277 | 0.76 | 0.19 | 1.5E-01 |
| rs7492600 | GCH1     | 14  | 54406625  | T   | 394 | 1.16 | 0.22 | 5.1E-01 | T                        | 292 | 1.31 | 0.26 | 2.9E-01 | T             | 281 | 0.99 | 0.28 | 9.6E-01 |
| rs7499077 | ITGAM    | 16  | 31225006  | A   | 394 | 0.99 | 0.16 | 9.4E-01 | A                        | 292 | 0.85 | 0.19 | 4.0E-01 | A             | 281 | 1.08 | 0.20 | 6.9E-01 |
| rs7515976 | PRKACB   | 1   | 84400331  | T   | 394 | 0.85 | 0.15 | 2.7E-01 | T                        | 292 | 0.94 | 0.18 | 7.1E-01 | T             | 281 | 0.78 | 0.18 | 1.8E-01 |
| rs7516175 | EPHB2    | 1   | 22969405  | C   | 394 | 0.93 | 0.22 | 7.5E-01 | C                        | 292 | 0.98 | 0.26 | 9.3E-01 | C             | 281 | 0.92 | 0.27 | 7.5E-01 |

| SNP       | GENE     | CHR | BP        | TMD |     |      |      |         | TMD with widespread pain |     |      |      |         | Localized TMD |     |      |      |         |
|-----------|----------|-----|-----------|-----|-----|------|------|---------|--------------------------|-----|------|------|---------|---------------|-----|------|------|---------|
|           |          |     |           | A1  | N   | OR   | SE   | P       | A1                       | N   | OR   | SE   | P       | A1            | N   | OR   | SE   | P       |
| rs7519192 | PLA2G4A  | 1   | 185129042 | G   | 393 | 0.77 | 0.16 | 1.0E-01 | G                        | 291 | 0.69 | 0.20 | 6.4E-02 | G             | 281 | 0.82 | 0.20 | 3.3E-01 |
| rs752183  | CACNA2D2 | 3   | 50511277  | A   | 392 | 0.82 | 0.26 | 4.6E-01 | A                        | 290 | 0.97 | 0.31 | 9.2E-01 | A             | 281 | 0.64 | 0.35 | 2.0E-01 |
| rs752266  | ADRA1B   | 5   | 159273610 | G   | 394 | 0.87 | 0.27 | 6.0E-01 | G                        | 292 | 0.74 | 0.35 | 3.9E-01 | G             | 281 | 1.12 | 0.32 | 7.2E-01 |
| rs7523086 | NGF      | 1   | 115624910 | A   | 394 | 1.04 | 0.15 | 8.2E-01 | A                        | 292 | 1.08 | 0.18 | 6.7E-01 | A             | 281 | 0.93 | 0.19 | 7.3E-01 |
| rs7525979 | NLRP3    | 1   | 245654031 | T   | 394 | 1.11 | 0.33 | 7.4E-01 | T                        | 292 | 1.59 | 0.37 | 2.1E-01 | T             | 281 | 0.77 | 0.46 | 5.7E-01 |
| rs752688  | GCH1     | 14  | 54381319  | T   | 394 | 0.94 | 0.17 | 7.3E-01 | T                        | 292 | 0.94 | 0.21 | 7.8E-01 | T             | 281 | 0.93 | 0.21 | 7.2E-01 |
| rs7530478 | EPHB2    | 1   | 23001303  | G   | 394 | 0.77 | 0.26 | 3.1E-01 | G                        | 292 | 0.80 | 0.32 | 4.8E-01 | G             | 281 | 0.82 | 0.33 | 5.5E-01 |
| rs7535459 | PLA2G4A  | 1   | 185069186 | C   | 393 | 1.07 | 0.15 | 6.4E-01 | C                        | 291 | 1.08 | 0.18 | 6.6E-01 | C             | 280 | 1.05 | 0.18 | 7.8E-01 |
| rs753572  | PRKCE    | 2   | 46055842  | T   | 394 | 1.00 | 0.15 | 1.0E+00 | T                        | 292 | 1.05 | 0.19 | 8.0E-01 | T             | 281 | 1.03 | 0.20 | 8.8E-01 |
| rs7537937 | GBP2     | 1   | 89355278  | G   | 393 | 1.03 | 0.15 | 8.6E-01 | G                        | 291 | 0.94 | 0.18 | 7.3E-01 | G             | 280 | 1.03 | 0.19 | 8.7E-01 |
| rs754635  | CCK      | 3   | 42280135  | C   | 382 | 1.00 | 0.22 | 1.0E+00 | C                        | 284 | 1.05 | 0.26 | 8.5E-01 | C             | 273 | 0.99 | 0.28 | 9.6E-01 |
| rs7546625 | PRKACB   | 1   | 84325194  | A   | 394 | 1.13 | 0.19 | 5.1E-01 | A                        | 292 | 1.02 | 0.23 | 9.4E-01 | A             | 281 | 1.27 | 0.23 | 3.1E-01 |
| rs7547948 | ATP1A1   | 1   | 116746405 | A   | 394 | 1.00 | 0.48 | 1.0E+00 | A                        | 292 | 1.22 | 0.54 | 7.2E-01 | A             | 281 | 0.66 | 0.68 | 5.5E-01 |
| rs7551399 | INADL    | 1   | 61979842  | A   | 394 | 1.15 | 0.26 | 6.0E-01 | A                        | 292 | 0.91 | 0.34 | 7.7E-01 | A             | 281 | 1.50 | 0.31 | 1.9E-01 |
| rs755203  | CHRNA4   | 20  | 61464708  | G   | 394 | 1.08 | 0.15 | 6.1E-01 | G                        | 292 | 1.06 | 0.18 | 7.3E-01 | G             | 281 | 1.08 | 0.18 | 6.7E-01 |
| rs7555140 | PLA2G4A  | 1   | 185184143 | C   | 390 | 0.90 | 0.15 | 4.9E-01 | C                        | 289 | 0.75 | 0.19 | 1.3E-01 | C             | 278 | 1.09 | 0.20 | 6.8E-01 |
| rs7555821 | GNG5     | 1   | 84730985  | T   | 394 | 0.79 | 0.23 | 3.1E-01 | T                        | 292 | 0.89 | 0.27 | 6.6E-01 | T             | 281 | 0.65 | 0.30 | 1.5E-01 |
| rs7556832 | ERBB4    | 2   | 213099751 | C   | 393 | 1.04 | 0.14 | 7.9E-01 | C                        | 292 | 1.02 | 0.16 | 9.1E-01 | C             | 280 | 1.08 | 0.18 | 6.9E-01 |
| rs7560562 | TRPM8    | 2   | 234576954 | C   | 394 | 0.99 | 0.15 | 9.4E-01 | C                        | 292 | 1.05 | 0.18 | 7.9E-01 | C             | 281 | 0.94 | 0.19 | 7.3E-01 |
| rs756275  | ADRA1B   | 5   | 159284038 | T   | 394 | 0.91 | 0.25 | 7.1E-01 | T                        | 292 | 0.95 | 0.32 | 8.9E-01 | T             | 281 | 1.01 | 0.31 | 9.7E-01 |
| rs7567183 | NTSR2    | 2   | 11728737  | C   | 394 | 0.91 | 0.15 | 5.4E-01 | C                        | 292 | 0.88 | 0.19 | 5.0E-01 | C             | 281 | 1.00 | 0.19 | 9.9E-01 |
| rs757228  | GPX4     | 19  | 1052992   | G   | 392 | 1.12 | 0.14 | 4.3E-01 | G                        | 290 | 1.20 | 0.18 | 3.1E-01 | G             | 280 | 1.15 | 0.18 | 4.6E-01 |
| rs758275  | TRPM8    | 2   | 234502759 | G   | 394 | 0.82 | 0.18 | 2.5E-01 | G                        | 292 | 0.69 | 0.22 | 9.3E-02 | G             | 281 | 0.98 | 0.22 | 9.4E-01 |
| rs759170  | EGFR     | 7   | 55122866  | T   | 394 | 1.29 | 0.20 | 2.0E-01 | T                        | 292 | 1.34 | 0.23 | 2.1E-01 | T             | 281 | 1.20 | 0.25 | 4.7E-01 |
| rs759171  | EGFR     | 7   | 55053706  | A   | 394 | 1.69 | 0.22 | 1.6E-02 | A                        | 292 | 1.83 | 0.25 | 1.6E-02 | A             | 281 | 1.49 | 0.27 | 1.3E-01 |
| rs7593557 | TRPM8    | 2   | 234528527 | A   | 394 | 0.90 | 0.33 | 7.4E-01 | A                        | 292 | 1.11 | 0.39 | 7.9E-01 | A             | 281 | 0.77 | 0.46 | 5.7E-01 |
| rs7602850 | ERBB4    | 2   | 212157069 | T   | 394 | 0.94 | 0.21 | 7.5E-01 | T                        | 292 | 0.82 | 0.27 | 4.6E-01 | T             | 281 | 1.04 | 0.26 | 8.9E-01 |
| rs760370  | SLC29A1  | 6   | 44308931  | G   | 392 | 0.95 | 0.15 | 7.5E-01 | G                        | 291 | 0.93 | 0.18 | 6.8E-01 | G             | 280 | 0.95 | 0.18 | 7.8E-01 |
| rs7604219 | HTR2B    | 2   | 231665568 | A   | 394 | 1.09 | 0.15 | 5.9E-01 | A                        | 292 | 1.11 | 0.18 | 5.7E-01 | A             | 281 | 1.04 | 0.19 | 8.4E-01 |
| rs7618370 | AIM      | 3   | 169391997 | G   | 394 | 1.00 | 0.19 | 1.0E+00 | G                        | 292 | 0.96 | 0.23 | 8.6E-01 | G             | 281 | 1.22 | 0.24 | 4.0E-01 |
| rs762146  | KCNJ6    | 21  | 38160002  | C   | 393 | 1.11 | 0.17 | 5.3E-01 | C                        | 291 | 1.25 | 0.20 | 2.8E-01 | C             | 281 | 1.09 | 0.20 | 6.8E-01 |
| rs763317  | EGFR     | 7   | 55062691  | A   | 392 | 0.87 | 0.15 | 3.4E-01 | A                        | 290 | 0.96 | 0.18 | 8.1E-01 | A             | 280 | 0.76 | 0.19 | 1.4E-01 |
| rs7644369 | EPHB1    | 3   | 136153214 | T   | 394 | 0.97 | 0.15 | 8.3E-01 | T                        | 292 | 1.02 | 0.18 | 9.3E-01 | T             | 281 | 0.88 | 0.18 | 5.0E-01 |
| rs7644388 | NFKBIZ   | 3   | 103039236 | T   | 394 | 0.93 | 0.17 | 6.8E-01 | T                        | 292 | 0.78 | 0.21 | 2.4E-01 | T             | 281 | 1.10 | 0.21 | 6.7E-01 |
| rs7652280 | EPHB3    | 3   | 185785328 | T   | 394 | 0.92 | 0.18 | 6.5E-01 | T                        | 292 | 0.87 | 0.23 | 5.6E-01 | T             | 281 | 1.01 | 0.23 | 9.5E-01 |
| rs765287  | GRIN2A   | 16  | 9783883   | A   | 393 | 1.09 | 0.15 | 5.7E-01 | A                        | 291 | 1.17 | 0.18 | 3.6E-01 | A             | 281 | 1.05 | 0.18 | 7.9E-01 |
| rs7653075 | EPHB3    | 3   | 185751048 | C   | 394 | 1.20 | 0.18 | 3.2E-01 | C                        | 292 | 1.11 | 0.23 | 6.5E-01 | C             | 281 | 1.32 | 0.22 | 2.1E-01 |
| rs765724  | RUNX2    | 6   | 45525096  | T   | 394 | 0.93 | 0.15 | 6.1E-01 | T                        | 292 | 1.01 | 0.18 | 9.5E-01 | T             | 281 | 0.87 | 0.19 | 4.4E-01 |
| rs7662029 | UGT2B7   | 4   | 69996501  | G   | 394 | 0.96 | 0.14 | 7.7E-01 | G                        | 292 | 0.94 | 0.18 | 7.1E-01 | G             | 281 | 1.02 | 0.18 | 9.1E-01 |

| SNP       | GENE     | CHR | BP        | TMD |     |      |      |         | TMD with widespread pain |     |      |      |         | Localized TMD |     |      |      |         |
|-----------|----------|-----|-----------|-----|-----|------|------|---------|--------------------------|-----|------|------|---------|---------------|-----|------|------|---------|
|           |          |     |           | A1  | N   | OR   | SE   | P       | A1                       | N   | OR   | SE   | P       | A1            | N   | OR   | SE   | P       |
| rs7662298 | GLRB     | 4   | 158307215 | G   | 394 | 0.94 | 0.25 | 8.0E-01 | G                        | 292 | 0.93 | 0.31 | 8.2E-01 | G             | 281 | 0.92 | 0.31 | 7.8E-01 |
| rs7666487 | GABRB1   | 4   | 46938494  | G   | 393 | 0.89 | 0.16 | 4.8E-01 | G                        | 291 | 0.91 | 0.20 | 6.5E-01 | G             | 280 | 0.85 | 0.21 | 4.4E-01 |
| rs7668258 | UGT2B7   | 4   | 69996667  | C   | 392 | 0.95 | 0.14 | 7.3E-01 | C                        | 290 | 0.93 | 0.18 | 6.7E-01 | C             | 279 | 1.01 | 0.18 | 9.5E-01 |
| rs7672929 | GLRB     | 4   | 158231766 | A   | 393 | 1.28 | 0.16 | 1.2E-01 | A                        | 291 | 1.54 | 0.19 | 2.3E-02 | A             | 280 | 1.05 | 0.20 | 8.2E-01 |
| rs7677890 | GABRB1   | 4   | 47066346  | T   | 393 | 0.96 | 0.14 | 7.8E-01 | T                        | 291 | 1.06 | 0.17 | 7.5E-01 | T             | 280 | 0.87 | 0.18 | 4.3E-01 |
| rs7678338 | GABRA4   | 4   | 46616864  | C   | 394 | 0.93 | 0.16 | 6.3E-01 | C                        | 292 | 0.77 | 0.20 | 1.9E-01 | C             | 281 | 1.12 | 0.20 | 5.9E-01 |
| rs7678463 | ADRA2C   | 4   | 3740750   | C   | 384 | 0.57 | 0.21 | 8.1E-03 | C                        | 283 | 0.46 | 0.28 | 4.8E-03 | C             | 274 | 0.70 | 0.26 | 1.6E-01 |
| rs7687423 | NPY1R    | 4   | 164470247 | A   | 394 | 1.16 | 0.15 | 3.1E-01 | A                        | 292 | 1.18 | 0.17 | 3.5E-01 | A             | 281 | 1.23 | 0.18 | 2.6E-01 |
| rs7687621 | EREG     | 4   | 75468690  | T   | 391 | 0.88 | 0.17 | 4.3E-01 | T                        | 290 | 0.85 | 0.20 | 4.3E-01 | T             | 279 | 0.80 | 0.21 | 2.8E-01 |
| rs7692883 | ADRA2C   | 4   | 3731921   | A   | 394 | 0.90 | 0.23 | 6.5E-01 | A                        | 292 | 0.80 | 0.28 | 4.3E-01 | A             | 281 | 0.92 | 0.28 | 7.5E-01 |
| rs769393  | GAD1     | 2   | 171417767 | A   | 394 | 1.44 | 0.31 | 2.3E-01 | A                        | 292 | 1.47 | 0.38 | 3.1E-01 | A             | 281 | 1.62 | 0.37 | 1.9E-01 |
| rs769407  | GAD1     | 2   | 171401954 | C   | 394 | 1.07 | 0.16 | 6.8E-01 | C                        | 292 | 0.93 | 0.20 | 7.4E-01 | C             | 281 | 1.29 | 0.20 | 2.1E-01 |
| rs7696139 | ADRA2C   | 4   | 3746046   | G   | 394 | 0.58 | 0.17 | 1.8E-03 | G                        | 292 | 0.53 | 0.22 | 3.4E-03 | G             | 281 | 0.60 | 0.22 | 1.9E-02 |
| rs7704970 | CAMK4    | 5   | 110594800 | A   | 392 | 0.90 | 0.19 | 5.9E-01 | A                        | 290 | 1.03 | 0.22 | 8.9E-01 | A             | 279 | 0.76 | 0.25 | 2.7E-01 |
| rs7709656 | GLRA1    | 5   | 151270918 | A   | 394 | 0.92 | 0.19 | 6.4E-01 | A                        | 292 | 0.90 | 0.23 | 6.3E-01 | A             | 281 | 0.90 | 0.24 | 6.7E-01 |
| rs7709924 | GRIA1    | 5   | 152946662 | G   | 393 | 0.90 | 0.15 | 4.8E-01 | G                        | 292 | 0.93 | 0.19 | 6.9E-01 | G             | 280 | 0.82 | 0.20 | 3.2E-01 |
| rs7718461 | CRHBP    | 5   | 76293804  | G   | 394 | 0.86 | 0.14 | 3.1E-01 | G                        | 292 | 0.85 | 0.18 | 3.5E-01 | G             | 281 | 0.94 | 0.18 | 7.5E-01 |
| rs7719315 | CSNK1A1  | 5   | 148898185 | C   | 394 | 1.13 | 0.16 | 4.6E-01 | C                        | 292 | 1.14 | 0.19 | 5.1E-01 | C             | 281 | 1.08 | 0.21 | 7.3E-01 |
| rs7724086 | GABRB2   | 5   | 160724214 | T   | 394 | 0.88 | 0.26 | 6.1E-01 | T                        | 292 | 0.84 | 0.31 | 5.8E-01 | T             | 281 | 0.88 | 0.33 | 6.9E-01 |
| rs7728001 | GABRG2   | 5   | 161482816 | C   | 394 | 1.20 | 0.21 | 4.0E-01 | C                        | 292 | 1.06 | 0.26 | 8.1E-01 | C             | 281 | 1.34 | 0.26 | 2.6E-01 |
| rs7728708 | ADRA1B   | 5   | 159287813 | T   | 394 | 1.33 | 0.20 | 1.5E-01 | T                        | 292 | 1.21 | 0.24 | 4.2E-01 | T             | 281 | 1.47 | 0.23 | 1.0E-01 |
| rs7735784 | GRIA1    | 5   | 153067976 | C   | 394 | 0.82 | 0.15 | 1.7E-01 | C                        | 292 | 0.75 | 0.18 | 1.2E-01 | C             | 281 | 0.87 | 0.19 | 4.4E-01 |
| rs7737    | ADORA3   | 1   | 111827675 | T   | 394 | 1.16 | 0.16 | 3.7E-01 | T                        | 292 | 1.42 | 0.19 | 6.6E-02 | T             | 281 | 0.92 | 0.21 | 6.9E-01 |
| rs7738600 | TAAR2    | 6   | 132972072 | C   | 390 | 1.48 | 0.41 | 3.4E-01 | C                        | 289 | 1.66 | 0.48 | 2.9E-01 | C             | 277 | 1.19 | 0.50 | 7.3E-01 |
| rs7739525 | OPRM1    | 6   | 154670772 | A   | 394 | 0.65 | 0.22 | 5.1E-02 | A                        | 292 | 0.74 | 0.26 | 2.5E-01 | A             | 281 | 0.47 | 0.31 | 1.5E-02 |
| rs7748484 | PACSN1   | 6   | 34563308  | A   | 394 | 0.90 | 0.21 | 6.1E-01 | A                        | 292 | 0.82 | 0.26 | 4.3E-01 | A             | 281 | 0.89 | 0.25 | 6.5E-01 |
| rs7761118 | MAPK14   | 6   | 36176281  | A   | 394 | 0.87 | 0.24 | 5.5E-01 | A                        | 292 | 0.83 | 0.32 | 5.5E-01 | A             | 281 | 1.14 | 0.30 | 6.6E-01 |
| rs7761846 | ESR1     | 6   | 152254201 | C   | 394 | 0.97 | 0.26 | 9.0E-01 | C                        | 292 | 0.92 | 0.32 | 8.0E-01 | C             | 281 | 1.05 | 0.32 | 8.8E-01 |
| rs7770466 | GRM1     | 6   | 146800958 | G   | 394 | 1.12 | 0.47 | 8.1E-01 | G                        | 292 | 1.62 | 0.53 | 3.6E-01 | G             | 281 | 0.75 | 0.69 | 6.8E-01 |
| rs7772928 | TAAR5    | 6   | 132958482 | A   | 394 | 0.86 | 0.28 | 5.8E-01 | A                        | 292 | 0.96 | 0.33 | 9.0E-01 | A             | 281 | 0.72 | 0.37 | 3.7E-01 |
| rs7776341 | OPRM1    | 6   | 154390298 | C   | 394 | 0.57 | 0.35 | 1.0E-01 | C                        | 292 | 0.38 | 0.50 | 5.5E-02 | C             | 281 | 0.71 | 0.41 | 4.0E-01 |
| rs7787082 | ABCB1    | 7   | 86994987  | A   | 394 | 0.96 | 0.19 | 8.5E-01 | A                        | 292 | 0.86 | 0.24 | 5.4E-01 | A             | 281 | 1.03 | 0.24 | 8.9E-01 |
| rs778819  | GRIA1    | 5   | 152949443 | C   | 394 | 0.96 | 0.16 | 8.1E-01 | C                        | 292 | 0.86 | 0.20 | 4.6E-01 | C             | 281 | 1.08 | 0.20 | 7.2E-01 |
| rs77905   | DBH      | 9   | 135507918 | A   | 393 | 0.92 | 0.15 | 5.6E-01 | A                        | 292 | 0.92 | 0.18 | 6.4E-01 | A             | 280 | 0.96 | 0.18 | 8.1E-01 |
| rs7794797 | CACNA2D1 | 7   | 81812061  | G   | 394 | 0.82 | 0.15 | 1.9E-01 | G                        | 292 | 0.86 | 0.19 | 4.0E-01 | G             | 281 | 0.79 | 0.20 | 2.5E-01 |
| rs7797314 | CACNA2D1 | 7   | 81494002  | G   | 394 | 1.02 | 0.19 | 9.2E-01 | G                        | 292 | 1.07 | 0.22 | 7.8E-01 | G             | 281 | 1.03 | 0.24 | 8.9E-01 |
| rs7800170 | CHRM2    | 7   | 136274860 | A   | 394 | 0.79 | 0.15 | 9.9E-02 | A                        | 292 | 0.89 | 0.17 | 5.1E-01 | A             | 281 | 0.68 | 0.18 | 3.6E-02 |
| rs7817    | IFRD1    | 7   | 111902894 | C   | 394 | 1.28 | 0.15 | 9.3E-02 | C                        | 292 | 1.30 | 0.18 | 1.4E-01 | C             | 281 | 1.34 | 0.18 | 1.2E-01 |
| rs7817710 | OPRK1    | 8   | 54305368  | T   | 394 | 0.89 | 0.24 | 6.3E-01 | T                        | 292 | 0.99 | 0.28 | 9.8E-01 | T             | 281 | 0.74 | 0.32 | 3.4E-01 |

| SNP       | GENE    | CHR | BP        | TMD |     |      |      |         | TMD with widespread pain |     |      |      |         | Localized TMD |     |      |      |         |
|-----------|---------|-----|-----------|-----|-----|------|------|---------|--------------------------|-----|------|------|---------|---------------|-----|------|------|---------|
|           |         |     |           | A1  | N   | OR   | SE   | P       | A1                       | N   | OR   | SE   | P       | A1            | N   | OR   | SE   | P       |
| rs7819063 | NRG1    | 8   | 31618950  | T   | 394 | 1.17 | 0.17 | 3.6E-01 | T                        | 292 | 1.23 | 0.20 | 3.0E-01 | T             | 281 | 1.16 | 0.21 | 4.8E-01 |
| rs7820807 | OPRK1   | 8   | 54301414  | C   | 394 | 0.95 | 0.23 | 8.2E-01 | C                        | 292 | 1.04 | 0.27 | 8.9E-01 | C             | 281 | 0.80 | 0.30 | 4.6E-01 |
| rs7821470 | PPP3CC  | 8   | 22361446  | C   | 394 | 1.15 | 0.30 | 6.5E-01 | C                        | 292 | 1.22 | 0.36 | 5.8E-01 | C             | 281 | 1.06 | 0.38 | 8.7E-01 |
| rs7825480 | PNOC    | 8   | 28234932  | G   | 390 | 0.94 | 0.20 | 7.6E-01 | G                        | 291 | 1.13 | 0.24 | 6.1E-01 | G             | 278 | 0.84 | 0.28 | 5.3E-01 |
| rs7835853 | ADRA1A  | 8   | 26718163  | T   | 394 | 0.84 | 0.18 | 3.6E-01 | T                        | 292 | 0.78 | 0.23 | 2.9E-01 | T             | 281 | 0.93 | 0.22 | 7.5E-01 |
| rs7842829 | ADRA1A  | 8   | 26685253  | C   | 393 | 0.93 | 0.15 | 6.1E-01 | C                        | 291 | 0.85 | 0.18 | 3.7E-01 | C             | 280 | 1.00 | 0.19 | 9.9E-01 |
| rs7869402 | TLR4    | 9   | 119517853 | T   | 393 | 0.51 | 0.45 | 1.4E-01 | T                        | 291 | 0.58 | 0.53 | 3.0E-01 | T             | 280 | 0.38 | 0.65 | 1.4E-01 |
| rs7869482 | GABBR2  | 9   | 100444170 | A   | 394 | 1.25 | 0.34 | 5.1E-01 | A                        | 292 | 1.70 | 0.38 | 1.6E-01 | A             | 281 | 0.82 | 0.47 | 6.7E-01 |
| rs7877036 | GLRA2   | 23  | 14537065  | C   | 389 | 0.99 | 0.15 | 9.6E-01 | C                        | 289 | 1.13 | 0.17 | 4.7E-01 | C             | 276 | 0.88 | 0.19 | 4.9E-01 |
| rs7889706 | GLRA2   | 23  | 14495054  | C   | 394 | 1.08 | 0.15 | 6.0E-01 | C                        | 292 | 0.95 | 0.18 | 7.5E-01 | C             | 281 | 1.37 | 0.19 | 9.5E-02 |
| rs7897669 | PRKG1   | 10  | 52547957  | A   | 389 | 0.55 | 0.21 | 4.8E-03 | A                        | 288 | 0.58 | 0.26 | 3.4E-02 | A             | 277 | 0.51 | 0.28 | 1.6E-02 |
| rs7900976 | GAD2    | 10  | 26604439  | G   | 394 | 0.92 | 0.19 | 6.4E-01 | G                        | 292 | 0.99 | 0.22 | 9.6E-01 | G             | 281 | 0.83 | 0.24 | 4.3E-01 |
| rs790250  | OPRM1   | 6   | 154572694 | C   | 392 | 1.34 | 0.16 | 6.4E-02 | C                        | 290 | 1.57 | 0.19 | 1.6E-02 | C             | 279 | 1.19 | 0.20 | 3.8E-01 |
| rs790260  | OPRM1   | 6   | 154580105 | T   | 394 | 1.10 | 0.14 | 4.9E-01 | T                        | 292 | 1.27 | 0.16 | 1.4E-01 | T             | 281 | 0.92 | 0.18 | 6.3E-01 |
| rs7911    | GBP1    | 1   | 89290708  | G   | 392 | 1.19 | 0.15 | 2.6E-01 | G                        | 290 | 1.29 | 0.18 | 1.6E-01 | G             | 280 | 0.97 | 0.19 | 8.8E-01 |
| rs7921462 | CPN1    | 10  | 101833130 | C   | 392 | 0.96 | 0.30 | 8.8E-01 | C                        | 290 | 0.65 | 0.40 | 2.8E-01 | C             | 280 | 1.22 | 0.33 | 5.6E-01 |
| rs7922090 | CHUK    | 10  | 101965259 | A   | 392 | 1.05 | 0.31 | 8.8E-01 | A                        | 290 | 1.05 | 0.37 | 9.0E-01 | A             | 280 | 1.06 | 0.38 | 8.9E-01 |
| rs7924416 | KCNJ5   | 11  | 128269390 | T   | 391 | 0.94 | 0.15 | 6.8E-01 | T                        | 290 | 0.97 | 0.19 | 8.5E-01 | T             | 279 | 0.92 | 0.20 | 6.9E-01 |
| rs7931588 | GRIA4   | 11  | 105098753 | A   | 393 | 0.92 | 0.14 | 5.7E-01 | A                        | 291 | 1.04 | 0.18 | 8.5E-01 | A             | 280 | 0.84 | 0.18 | 3.4E-01 |
| rs7932809 | AIM     | 11  | 121171910 | C   | 394 | 0.78 | 0.15 | 8.2E-02 | C                        | 292 | 0.74 | 0.18 | 9.0E-02 | C             | 281 | 0.77 | 0.19 | 1.6E-01 |
| rs7942396 | SC5DL   | 11  | 120684759 | T   | 394 | 1.73 | 0.28 | 4.8E-02 | T                        | 292 | 1.67 | 0.33 | 1.1E-01 | T             | 281 | 1.84 | 0.34 | 7.4E-02 |
| rs7950368 | MRGPRD  | 11  | 68503377  | A   | 394 | 1.08 | 0.16 | 6.4E-01 | A                        | 292 | 1.05 | 0.19 | 8.0E-01 | A             | 281 | 1.09 | 0.20 | 6.4E-01 |
| rs7952915 | GRIN2B  | 12  | 13924127  | G   | 394 | 0.95 | 0.18 | 7.9E-01 | G                        | 292 | 1.27 | 0.21 | 2.6E-01 | G             | 281 | 0.68 | 0.24 | 1.1E-01 |
| rs7956547 | IGF1    | 12  | 101382946 | C   | 389 | 0.73 | 0.16 | 5.9E-02 | C                        | 289 | 0.68 | 0.20 | 5.4E-02 | C             | 277 | 0.77 | 0.20 | 1.9E-01 |
| rs7975319 | SCN8A   | 12  | 50267960  | T   | 394 | 0.83 | 0.27 | 5.0E-01 | T                        | 292 | 0.66 | 0.36 | 2.6E-01 | T             | 281 | 0.98 | 0.33 | 9.4E-01 |
| rs797765  | SLC6A13 | 12  | 242699    | A   | 394 | 0.80 | 0.17 | 1.9E-01 | A                        | 292 | 0.82 | 0.20 | 3.2E-01 | A             | 281 | 0.81 | 0.21 | 3.0E-01 |
| rs7983579 | EFNB2   | 13  | 105957447 | G   | 394 | 0.88 | 0.14 | 3.5E-01 | G                        | 292 | 0.91 | 0.17 | 5.9E-01 | G             | 281 | 0.85 | 0.18 | 3.7E-01 |
| rs8000078 | EFNB2   | 13  | 105977975 | T   | 393 | 0.67 | 0.15 | 7.0E-03 | T                        | 291 | 0.60 | 0.18 | 5.5E-03 | T             | 280 | 0.72 | 0.19 | 7.7E-02 |
| rs8001826 | EFNB2   | 13  | 105958958 | C   | 393 | 0.84 | 0.21 | 4.0E-01 | C                        | 291 | 0.81 | 0.26 | 4.1E-01 | C             | 280 | 0.90 | 0.26 | 6.9E-01 |
| rs8005745 | HIF1A   | 14  | 61255048  | T   | 394 | 1.03 | 0.24 | 9.0E-01 | T                        | 292 | 1.00 | 0.29 | 1.0E+00 | T             | 281 | 1.08 | 0.30 | 8.1E-01 |
| rs8005905 | HSPCA   | 14  | 101638120 | T   | 394 | 1.12 | 0.23 | 6.4E-01 | T                        | 292 | 1.15 | 0.28 | 6.3E-01 | T             | 281 | 1.04 | 0.29 | 8.9E-01 |
| rs8006174 | DDX24   | 14  | 93622082  | G   | 394 | 0.86 | 0.19 | 4.4E-01 | G                        | 292 | 1.05 | 0.23 | 8.2E-01 | G             | 281 | 0.76 | 0.25 | 2.8E-01 |
| rs8007201 | GCH1    | 14  | 54394598  | G   | 394 | 0.92 | 0.15 | 5.6E-01 | G                        | 292 | 0.82 | 0.18 | 2.8E-01 | G             | 281 | 1.03 | 0.18 | 8.9E-01 |
| rs8007267 | GCH1    | 14  | 54448741  | T   | 394 | 0.88 | 0.18 | 4.7E-01 | T                        | 292 | 0.83 | 0.23 | 4.0E-01 | T             | 281 | 0.92 | 0.22 | 7.0E-01 |
| rs8012335 | PRKD1   | 14  | 29146484  | G   | 393 | 0.92 | 0.15 | 5.9E-01 | G                        | 291 | 0.96 | 0.19 | 8.4E-01 | G             | 281 | 0.84 | 0.20 | 3.9E-01 |
| rs8016905 | BDKRB2  | 14  | 95745686  | A   | 394 | 0.80 | 0.16 | 1.8E-01 | A                        | 292 | 0.83 | 0.19 | 3.3E-01 | A             | 281 | 0.82 | 0.20 | 3.2E-01 |
| rs8017441 | ESR2    | 14  | 63785547  | G   | 393 | 0.79 | 0.27 | 3.7E-01 | G                        | 291 | 0.87 | 0.32 | 6.6E-01 | G             | 281 | 0.72 | 0.35 | 3.4E-01 |
| rs8030094 | CHRM5   | 15  | 32124174  | A   | 394 | 1.05 | 0.18 | 7.8E-01 | A                        | 292 | 1.06 | 0.22 | 8.1E-01 | A             | 281 | 1.08 | 0.22 | 7.3E-01 |
| rs8031    | SOD2    | 6   | 160020630 | T   | 394 | 1.09 | 0.14 | 5.3E-01 | T                        | 292 | 0.98 | 0.17 | 9.1E-01 | T             | 281 | 1.25 | 0.17 | 1.9E-01 |



| SNP       | GENE    | CHR | BP        | TMD |     |      |      |         | TMD with widespread pain |     |      |      |         | Localized TMD |     |      |      |         |
|-----------|---------|-----|-----------|-----|-----|------|------|---------|--------------------------|-----|------|------|---------|---------------|-----|------|------|---------|
|           |         |     |           | A1  | N   | OR   | SE   | P       | A1                       | N   | OR   | SE   | P       | A1            | N   | OR   | SE   | P       |
| rs8031871 | NTRK3   | 15  | 86294012  | T   | 394 | 0.96 | 0.14 | 7.8E-01 | T                        | 292 | 0.87 | 0.17 | 4.4E-01 | T             | 281 | 1.06 | 0.18 | 7.4E-01 |
| rs8036023 | MAP2K1  | 15  | 64518339  | C   | 394 | 1.05 | 0.15 | 7.6E-01 | C                        | 292 | 0.93 | 0.18 | 7.0E-01 | C             | 281 | 1.15 | 0.18 | 4.4E-01 |
| rs8036052 | GABRB3  | 15  | 24391538  | C   | 394 | 0.90 | 0.23 | 6.4E-01 | C                        | 292 | 0.87 | 0.28 | 6.2E-01 | C             | 281 | 0.93 | 0.30 | 8.0E-01 |
| rs8044794 | VPS4A   | 16  | 67905200  | G   | 391 | 0.97 | 0.16 | 8.5E-01 | G                        | 291 | 0.95 | 0.19 | 8.0E-01 | G             | 278 | 1.11 | 0.20 | 5.9E-01 |
| rs8048583 | ITGAM   | 16  | 31187037  | T   | 394 | 1.08 | 0.16 | 6.3E-01 | T                        | 292 | 1.11 | 0.19 | 5.8E-01 | T             | 281 | 1.03 | 0.20 | 8.8E-01 |
| rs8052800 | GRIN2A  | 16  | 10040290  | C   | 394 | 0.90 | 0.14 | 4.4E-01 | C                        | 292 | 0.89 | 0.17 | 4.9E-01 | C             | 281 | 0.93 | 0.18 | 6.7E-01 |
| rs8057320 | ITGAM   | 16  | 31177052  | C   | 394 | 1.01 | 0.16 | 9.4E-01 | C                        | 292 | 1.07 | 0.20 | 7.2E-01 | C             | 281 | 0.95 | 0.20 | 7.9E-01 |
| rs806368  | CNR1    | 6   | 88906819  | C   | 393 | 0.92 | 0.17 | 6.3E-01 | C                        | 291 | 0.78 | 0.22 | 2.5E-01 | C             | 281 | 1.12 | 0.21 | 5.8E-01 |
| rs806378  | CNR1    | 6   | 88916270  | T   | 394 | 1.01 | 0.16 | 9.4E-01 | T                        | 292 | 0.83 | 0.20 | 3.6E-01 | T             | 281 | 1.15 | 0.19 | 4.7E-01 |
| rs806381  | CNR1    | 6   | 88922620  | G   | 392 | 1.08 | 0.15 | 6.0E-01 | G                        | 290 | 0.91 | 0.19 | 6.3E-01 | G             | 280 | 1.16 | 0.19 | 4.3E-01 |
| rs8065080 | TRPV1   | 17  | 3427196   | C   | 394 | 1.07 | 0.15 | 6.5E-01 | C                        | 292 | 1.11 | 0.18 | 5.8E-01 | C             | 281 | 0.99 | 0.19 | 9.7E-01 |
| rs8066276 | ACE     | 17  | 58942997  | T   | 394 | 1.08 | 0.15 | 6.1E-01 | T                        | 292 | 1.02 | 0.18 | 9.3E-01 | T             | 281 | 1.22 | 0.19 | 2.8E-01 |
| rs8069909 | ACCN1   | 17  | 28529083  | T   | 394 | 1.05 | 0.31 | 8.8E-01 | T                        | 292 | 0.80 | 0.42 | 5.9E-01 | T             | 281 | 1.62 | 0.37 | 1.9E-01 |
| rs8072199 | NOS2A   | 17  | 23140975  | T   | 394 | 1.07 | 0.15 | 6.6E-01 | T                        | 292 | 1.06 | 0.18 | 7.6E-01 | T             | 281 | 1.11 | 0.19 | 5.8E-01 |
| rs8075808 | CCL3    | 17  | 31433897  | C   | 392 | 0.89 | 0.15 | 4.3E-01 | C                        | 290 | 0.81 | 0.18 | 2.7E-01 | C             | 279 | 0.95 | 0.19 | 8.0E-01 |
| rs8079006 | MPO     | 17  | 53701468  | A   | 390 | 1.03 | 0.20 | 8.7E-01 | A                        | 290 | 1.02 | 0.26 | 9.5E-01 | A             | 278 | 1.03 | 0.25 | 9.1E-01 |
| rs8079271 | TRPV2   | 17  | 16263089  | G   | 394 | 0.93 | 0.15 | 6.5E-01 | G                        | 292 | 1.07 | 0.18 | 7.2E-01 | G             | 281 | 0.80 | 0.20 | 2.6E-01 |
| rs8081248 | NOS2A   | 17  | 23106091  | A   | 393 | 1.15 | 0.15 | 3.4E-01 | A                        | 291 | 1.20 | 0.18 | 3.2E-01 | A             | 280 | 1.17 | 0.19 | 3.9E-01 |
| rs8086    | ACSL1   | 4   | 185914415 | T   | 393 | 0.96 | 0.16 | 7.8E-01 | T                        | 291 | 1.06 | 0.19 | 7.6E-01 | T             | 280 | 0.78 | 0.20 | 2.3E-01 |
| rs8100819 | PRKACA  | 19  | 14088601  | A   | 393 | 0.86 | 0.23 | 5.1E-01 | A                        | 292 | 0.84 | 0.28 | 5.5E-01 | A             | 280 | 0.92 | 0.28 | 7.8E-01 |
| rs8103699 | CACNA1A | 19  | 13225012  | T   | 394 | 0.98 | 0.16 | 8.8E-01 | T                        | 292 | 1.02 | 0.19 | 9.2E-01 | T             | 281 | 0.98 | 0.19 | 9.0E-01 |
| rs8109003 | CACNA1A | 19  | 13379462  | T   | 394 | 1.09 | 0.15 | 5.5E-01 | T                        | 292 | 1.09 | 0.18 | 6.3E-01 | T             | 281 | 1.12 | 0.19 | 5.5E-01 |
| rs81189   | CRHR1   | 17  | 41250579  | C   | 391 | 0.98 | 0.14 | 8.9E-01 | C                        | 290 | 0.97 | 0.17 | 8.3E-01 | C             | 278 | 0.94 | 0.18 | 7.3E-01 |
| rs8121    | TRPV2   | 17  | 16266693  | G   | 394 | 1.18 | 0.15 | 2.7E-01 | G                        | 292 | 1.22 | 0.18 | 2.7E-01 | G             | 281 | 1.21 | 0.18 | 3.1E-01 |
| rs8136867 | MAPK1   | 22  | 20534793  | G   | 392 | 0.85 | 0.14 | 2.3E-01 | G                        | 291 | 1.02 | 0.17 | 9.1E-01 | G             | 280 | 0.66 | 0.18 | 2.2E-02 |
| rs815608  | AIM     | 5   | 153496967 | G   | 393 | 0.87 | 0.14 | 3.3E-01 | G                        | 291 | 0.87 | 0.17 | 4.2E-01 | G             | 280 | 0.82 | 0.18 | 2.7E-01 |
| rs815802  | CALM2   | 2   | 47245553  | G   | 394 | 1.83 | 0.25 | 1.7E-02 | G                        | 292 | 2.39 | 0.29 | 2.2E-03 | G             | 281 | 1.36 | 0.35 | 3.8E-01 |
| rs815815  | CALM2   | 2   | 47252568  | C   | 393 | 1.41 | 0.23 | 1.3E-01 | C                        | 291 | 1.91 | 0.26 | 1.2E-02 | C             | 280 | 0.91 | 0.32 | 7.7E-01 |
| rs816353  | NOS1    | 12  | 116169163 | T   | 394 | 1.00 | 0.15 | 1.0E+00 | T                        | 292 | 1.28 | 0.17 | 1.5E-01 | T             | 281 | 0.71 | 0.19 | 6.4E-02 |
| rs8179390 | PTGER3  | 1   | 71266953  | G   | 392 | 1.06 | 0.15 | 7.1E-01 | G                        | 290 | 0.92 | 0.18 | 6.5E-01 | G             | 280 | 1.30 | 0.19 | 1.6E-01 |
| rs8190800 | GAD2    | 10  | 26630322  | T   | 394 | 1.07 | 0.26 | 8.0E-01 | T                        | 292 | 1.32 | 0.30 | 3.4E-01 | T             | 281 | 0.76 | 0.36 | 4.5E-01 |
| rs8191992 | CHRM2   | 7   | 136351848 | T   | 393 | 1.27 | 0.16 | 1.2E-01 | T                        | 291 | 1.21 | 0.18 | 2.9E-01 | T             | 280 | 1.32 | 0.20 | 1.5E-01 |
| rs8192503 | DBI     | 2   | 119842159 | T   | 394 | 0.77 | 0.17 | 1.3E-01 | T                        | 292 | 0.62 | 0.23 | 3.3E-02 | T             | 281 | 0.92 | 0.21 | 6.8E-01 |
| rs8192506 | DBI     | 2   | 119846311 | G   | 394 | 0.60 | 0.46 | 2.7E-01 | G                        | 292 | 0.54 | 0.59 | 2.9E-01 | G             | 281 | 0.61 | 0.59 | 3.9E-01 |
| rs8192619 | TAAR1   | 6   | 133008041 | A   | 394 | 1.84 | 0.38 | 1.1E-01 | A                        | 292 | 1.91 | 0.43 | 1.3E-01 | A             | 281 | 1.57 | 0.46 | 3.3E-01 |
| rs8192620 | TAAR1   | 6   | 133007972 | C   | 394 | 1.20 | 0.17 | 2.8E-01 | C                        | 292 | 1.13 | 0.21 | 5.5E-01 | C             | 281 | 1.34 | 0.20 | 1.4E-01 |
| rs8192622 | TAAR6   | 6   | 132933231 | T   | 394 | 0.70 | 0.38 | 3.5E-01 | T                        | 292 | 0.48 | 0.52 | 1.6E-01 | T             | 281 | 0.89 | 0.45 | 7.9E-01 |
| rs8192624 | TAAR6   | 6   | 132933946 | A   | 388 | 0.78 | 0.28 | 3.6E-01 | A                        | 286 | 0.73 | 0.34 | 3.6E-01 | A             | 276 | 0.74 | 0.36 | 4.0E-01 |
| rs8192625 | TAAR6   | 6   | 132934025 | A   | 394 | 0.76 | 0.30 | 3.7E-01 | A                        | 292 | 0.61 | 0.40 | 2.1E-01 | A             | 281 | 0.85 | 0.36 | 6.6E-01 |

| SNP       | GENE   | CHR | BP        | TMD |     |      |      |         | TMD with widespread pain |     |      |      |         | Localized TMD |     |      |      |         |
|-----------|--------|-----|-----------|-----|-----|------|------|---------|--------------------------|-----|------|------|---------|---------------|-----|------|------|---------|
|           |        |     |           | A1  | N   | OR   | SE   | P       | A1                       | N   | OR   | SE   | P       | A1            | N   | OR   | SE   | P       |
| rs8192627 | TAAR8  | 6   | 132916507 | C   | 394 | 1.38 | 0.31 | 2.9E-01 | C                        | 292 | 1.10 | 0.39 | 8.1E-01 | C             | 281 | 1.57 | 0.36 | 2.1E-01 |
| rs8192646 | TAAR2  | 6   | 132980535 | T   | 394 | 0.54 | 0.57 | 2.8E-01 | T                        | 292 | 0.67 | 0.69 | 5.6E-01 | T             | 281 | 0.49 | 0.80 | 3.8E-01 |
| rs8192658 | ATF3   | 1   | 210855190 | T   | 389 | 0.83 | 0.44 | 6.7E-01 | T                        | 289 | 0.90 | 0.52 | 8.3E-01 | T             | 277 | 0.67 | 0.59 | 4.9E-01 |
| rs829064  | KCNJ8  | 12  | 21831775  | C   | 394 | 1.30 | 0.19 | 1.7E-01 | C                        | 292 | 1.53 | 0.23 | 5.9E-02 | C             | 281 | 1.11 | 0.23 | 6.5E-01 |
| rs833061  | VEGFA  | 6   | 43845464  | C   | 394 | 0.92 | 0.14 | 5.7E-01 | C                        | 292 | 0.89 | 0.17 | 5.0E-01 | C             | 281 | 0.98 | 0.18 | 9.0E-01 |
| rs833069  | VEGFA  | 6   | 43850557  | C   | 394 | 1.03 | 0.16 | 8.7E-01 | C                        | 292 | 1.07 | 0.19 | 7.2E-01 | C             | 281 | 0.99 | 0.20 | 9.6E-01 |
| rs835873  | ADRA1D | 20  | 4150802   | A   | 388 | 1.17 | 0.22 | 4.8E-01 | A                        | 287 | 1.29 | 0.25 | 3.1E-01 | A             | 276 | 0.95 | 0.29 | 8.5E-01 |
| rs835880  | ADRA1D | 20  | 4156895   | G   | 391 | 1.18 | 0.17 | 3.3E-01 | G                        | 290 | 1.32 | 0.20 | 1.7E-01 | G             | 278 | 0.98 | 0.21 | 9.4E-01 |
| rs844395  | GRIN2A | 16  | 10010407  | T   | 394 | 0.93 | 0.14 | 6.2E-01 | T                        | 292 | 0.99 | 0.17 | 9.4E-01 | T             | 281 | 0.85 | 0.18 | 3.6E-01 |
| rs845552  | EGFR   | 7   | 55213001  | G   | 394 | 0.94 | 0.15 | 6.6E-01 | G                        | 292 | 0.82 | 0.18 | 2.5E-01 | G             | 281 | 1.02 | 0.18 | 9.0E-01 |
| rs850602  | ATP1A1 | 1   | 116722475 | G   | 394 | 1.21 | 0.17 | 2.5E-01 | G                        | 292 | 1.37 | 0.19 | 1.0E-01 | G             | 281 | 0.97 | 0.21 | 8.8E-01 |
| rs851006  | MAPK14 | 6   | 36173163  | T   | 394 | 1.18 | 0.17 | 3.2E-01 | T                        | 292 | 1.33 | 0.20 | 1.6E-01 | T             | 281 | 0.95 | 0.22 | 8.2E-01 |
| rs851024  | MAPK14 | 6   | 36107542  | C   | 394 | 0.86 | 0.14 | 2.8E-01 | C                        | 292 | 0.83 | 0.18 | 2.9E-01 | C             | 281 | 0.88 | 0.18 | 4.9E-01 |
| rs856934  | NTSR1  | 20  | 60854488  | G   | 393 | 0.79 | 0.19 | 2.2E-01 | G                        | 291 | 0.76 | 0.24 | 2.5E-01 | G             | 281 | 0.83 | 0.25 | 4.5E-01 |
| rs858027  | KCNJ6  | 21  | 38026050  | A   | 394 | 1.26 | 0.24 | 3.4E-01 | A                        | 292 | 1.22 | 0.29 | 5.0E-01 | A             | 281 | 1.28 | 0.30 | 4.0E-01 |
| rs858040  | KCNJ6  | 21  | 38018543  | G   | 394 | 1.01 | 0.16 | 9.3E-01 | G                        | 292 | 1.19 | 0.20 | 4.0E-01 | G             | 281 | 0.90 | 0.20 | 5.9E-01 |
| rs860859  | CALCRL | 2   | 187917954 | A   | 394 | 0.87 | 0.15 | 3.3E-01 | A                        | 292 | 0.79 | 0.18 | 1.9E-01 | A             | 281 | 0.98 | 0.18 | 9.2E-01 |
| rs863820  | GRM1   | 6   | 146389095 | G   | 393 | 1.01 | 0.15 | 9.3E-01 | G                        | 291 | 0.93 | 0.18 | 6.9E-01 | G             | 280 | 1.11 | 0.18 | 5.9E-01 |
| rs867755  | GRK6   | 5   | 176790655 | T   | 392 | 1.30 | 0.15 | 7.3E-02 | T                        | 291 | 1.28 | 0.18 | 1.6E-01 | T             | 280 | 1.27 | 0.18 | 1.9E-01 |
| rs8682    | RAB5A  | 3   | 20001413  | G   | 393 | 0.82 | 0.22 | 3.6E-01 | G                        | 291 | 0.64 | 0.28 | 1.1E-01 | G             | 280 | 1.06 | 0.27 | 8.3E-01 |
| rs8684    | MAP2K1 | 15  | 64570664  | A   | 394 | 1.17 | 0.28 | 5.7E-01 | A                        | 292 | 1.29 | 0.33 | 4.4E-01 | A             | 281 | 0.93 | 0.36 | 8.4E-01 |
| rs869185  | KCNIP3 | 2   | 95387883  | A   | 394 | 1.04 | 0.20 | 8.4E-01 | A                        | 292 | 0.91 | 0.25 | 7.1E-01 | A             | 281 | 1.26 | 0.24 | 3.4E-01 |
| rs871196  | GRK5   | 10  | 121059064 | G   | 394 | 1.04 | 0.15 | 8.2E-01 | G                        | 292 | 1.12 | 0.18 | 5.5E-01 | G             | 281 | 0.93 | 0.19 | 7.2E-01 |
| rs872331  | CRYAA  | 21  | 43462284  | C   | 387 | 0.87 | 0.15 | 3.6E-01 | C                        | 289 | 0.82 | 0.18 | 2.6E-01 | C             | 275 | 0.99 | 0.19 | 9.5E-01 |
| rs873593  | CAMK2A | 5   | 149649664 | T   | 394 | 0.83 | 0.27 | 5.0E-01 | T                        | 292 | 1.05 | 0.31 | 8.8E-01 | T             | 281 | 0.57 | 0.39 | 1.4E-01 |
| rs876685  | EPHB2  | 1   | 22945007  | G   | 394 | 0.83 | 0.23 | 4.2E-01 | G                        | 292 | 1.05 | 0.26 | 8.5E-01 | G             | 281 | 0.56 | 0.33 | 7.7E-02 |
| rs877172  | OXT    | 20  | 2997890   | G   | 393 | 1.05 | 0.16 | 7.8E-01 | G                        | 291 | 1.14 | 0.19 | 4.9E-01 | G             | 281 | 0.99 | 0.20 | 9.6E-01 |
| rs878567  | HTR1A  | 5   | 63291747  | A   | 394 | 0.90 | 0.14 | 4.8E-01 | A                        | 292 | 0.95 | 0.17 | 7.7E-01 | A             | 281 | 0.82 | 0.18 | 2.6E-01 |
| rs879096  | ADRB2  | 5   | 148177622 | C   | 394 | 0.91 | 0.18 | 5.9E-01 | C                        | 292 | 0.72 | 0.24 | 1.8E-01 | C             | 281 | 1.17 | 0.22 | 4.7E-01 |
| rs880028  | DDC    | 7   | 50537630  | G   | 394 | 0.91 | 0.19 | 6.3E-01 | G                        | 292 | 1.03 | 0.22 | 9.1E-01 | G             | 281 | 0.78 | 0.25 | 3.2E-01 |
| rs881     | TACR1  | 2   | 75129937  | G   | 394 | 0.73 | 0.19 | 9.4E-02 | G                        | 292 | 0.69 | 0.23 | 1.1E-01 | G             | 281 | 0.77 | 0.24 | 2.7E-01 |
| rs881827  | S100B  | 21  | 46844296  | A   | 394 | 0.68 | 0.16 | 1.8E-02 | A                        | 292 | 0.67 | 0.20 | 4.5E-02 | A             | 281 | 0.66 | 0.21 | 4.6E-02 |
| rs8836    | GALR2  | 17  | 71589092  | G   | 389 | 1.11 | 0.14 | 4.8E-01 | G                        | 287 | 1.25 | 0.18 | 2.0E-01 | G             | 279 | 0.94 | 0.18 | 7.2E-01 |
| rs884225  | EGFR   | 7   | 55241578  | C   | 394 | 1.06 | 0.24 | 8.1E-01 | C                        | 292 | 1.38 | 0.26 | 2.2E-01 | C             | 281 | 0.61 | 0.35 | 1.5E-01 |
| rs885820  | BDKRB2 | 14  | 95774977  | A   | 394 | 0.46 | 0.30 | 9.5E-03 | A                        | 292 | 0.48 | 0.39 | 5.4E-02 | A             | 281 | 0.53 | 0.39 | 1.0E-01 |
| rs888709  | GNB2L1 | 5   | 180605834 | G   | 393 | 1.21 | 0.17 | 2.6E-01 | G                        | 292 | 1.22 | 0.21 | 3.4E-01 | G             | 280 | 1.29 | 0.21 | 2.3E-01 |
| rs889548  | AIM    | 16  | 31045213  | T   | 393 | 0.77 | 0.15 | 7.8E-02 | T                        | 291 | 0.70 | 0.18 | 4.9E-02 | T             | 281 | 0.86 | 0.18 | 4.2E-01 |
| rs893964  | EPHB2  | 1   | 22958683  | T   | 394 | 1.27 | 0.18 | 1.8E-01 | T                        | 292 | 1.27 | 0.21 | 2.6E-01 | T             | 281 | 1.26 | 0.23 | 3.2E-01 |
| rs899173  | PRKACA | 19  | 14094734  | T   | 394 | 0.88 | 0.23 | 5.7E-01 | T                        | 292 | 0.84 | 0.28 | 5.5E-01 | T             | 281 | 0.91 | 0.28 | 7.4E-01 |

| SNP       | GENE     | CHR | BP        | TMD |     |      |      |         | TMD with widespread pain |     |      |      |         | Localized TMD |     |      |      |         |
|-----------|----------|-----|-----------|-----|-----|------|------|---------|--------------------------|-----|------|------|---------|---------------|-----|------|------|---------|
|           |          |     |           | A1  | N   | OR   | SE   | P       | A1                       | N   | OR   | SE   | P       | A1            | N   | OR   | SE   | P       |
| rs9005    | IL1RN    | 2   | 113607883 | A   | 393 | 0.92 | 0.14 | 5.8E-01 | A                        | 291 | 0.87 | 0.18 | 4.3E-01 | A             | 280 | 1.02 | 0.18 | 9.2E-01 |
| rs9025    | ADORA3   | 1   | 111827721 | A   | 394 | 1.53 | 0.19 | 2.3E-02 | A                        | 292 | 1.81 | 0.22 | 6.7E-03 | A             | 281 | 1.27 | 0.23 | 3.1E-01 |
| rs903263  | PRKACB   | 1   | 84395101  | G   | 394 | 0.84 | 0.15 | 2.4E-01 | G                        | 292 | 0.92 | 0.18 | 6.3E-01 | G             | 281 | 0.78 | 0.18 | 1.8E-01 |
| rs904053  | PNOC     | 8   | 28258855  | C   | 392 | 1.16 | 0.16 | 3.5E-01 | C                        | 290 | 1.23 | 0.19 | 2.7E-01 | C             | 280 | 1.06 | 0.19 | 7.7E-01 |
| rs906895  | CCKBR    | 11  | 6236824   | C   | 394 | 1.11 | 0.14 | 4.5E-01 | C                        | 292 | 1.16 | 0.17 | 3.9E-01 | C             | 281 | 1.05 | 0.17 | 7.8E-01 |
| rs907893  | MAP2K1   | 15  | 64468081  | G   | 394 | 1.06 | 0.16 | 7.0E-01 | G                        | 292 | 0.95 | 0.19 | 8.1E-01 | G             | 281 | 1.16 | 0.19 | 4.4E-01 |
| rs908867  | BDNF     | 11  | 27702340  | T   | 394 | 1.45 | 0.26 | 1.6E-01 | T                        | 292 | 1.32 | 0.31 | 3.7E-01 | T             | 281 | 1.44 | 0.32 | 2.5E-01 |
| rs909172  | ZFAND5   | 9   | 74167800  | A   | 394 | 1.14 | 0.14 | 3.6E-01 | A                        | 292 | 1.28 | 0.17 | 1.5E-01 | A             | 281 | 1.03 | 0.17 | 8.8E-01 |
| rs909525  | MAOA     | 23  | 43438146  | C   | 393 | 1.13 | 0.15 | 4.3E-01 | C                        | 291 | 1.21 | 0.19 | 3.1E-01 | C             | 280 | 0.98 | 0.19 | 9.3E-01 |
| rs910330  | NGF      | 1   | 115637023 | T   | 393 | 0.86 | 0.16 | 3.6E-01 | T                        | 291 | 0.86 | 0.20 | 4.5E-01 | T             | 280 | 0.93 | 0.20 | 7.1E-01 |
| rs913168  | FAAH     | 1   | 46631163  | C   | 392 | 0.89 | 0.15 | 4.5E-01 | C                        | 290 | 0.97 | 0.18 | 8.5E-01 | C             | 281 | 0.83 | 0.18 | 3.0E-01 |
| rs915120  | GRK5     | 10  | 121180103 | C   | 394 | 1.13 | 0.14 | 3.9E-01 | C                        | 292 | 1.34 | 0.18 | 9.3E-02 | C             | 281 | 0.95 | 0.18 | 7.9E-01 |
| rs915906  | CYP2E1   | 10  | 135193728 | C   | 394 | 1.27 | 0.19 | 2.1E-01 | C                        | 292 | 1.53 | 0.23 | 6.2E-02 | C             | 281 | 0.99 | 0.25 | 9.7E-01 |
| rs917834  | GRIN2A   | 16  | 9868380   | C   | 394 | 1.05 | 0.15 | 7.6E-01 | C                        | 292 | 1.08 | 0.19 | 6.9E-01 | C             | 281 | 1.05 | 0.19 | 7.8E-01 |
| rs918168  | GRIN2B   | 12  | 13969901  | T   | 394 | 1.06 | 0.16 | 7.0E-01 | T                        | 292 | 1.15 | 0.18 | 4.3E-01 | T             | 281 | 0.91 | 0.20 | 6.4E-01 |
| rs919334  | CAMK4    | 5   | 110581301 | G   | 394 | 1.02 | 0.15 | 8.8E-01 | G                        | 292 | 0.90 | 0.19 | 5.7E-01 | G             | 281 | 1.21 | 0.19 | 3.3E-01 |
| rs919740  | CAMK2A   | 5   | 149646042 | G   | 393 | 1.19 | 0.17 | 3.0E-01 | G                        | 291 | 1.03 | 0.21 | 8.9E-01 | G             | 281 | 1.44 | 0.20 | 6.8E-02 |
| rs919741  | CAMK2A   | 5   | 149591881 | T   | 394 | 0.89 | 0.17 | 5.0E-01 | T                        | 292 | 0.84 | 0.21 | 4.0E-01 | T             | 281 | 0.93 | 0.21 | 7.2E-01 |
| rs923     | ADORA3   | 1   | 111843906 | G   | 394 | 1.20 | 0.18 | 3.1E-01 | G                        | 292 | 1.02 | 0.23 | 9.3E-01 | G             | 281 | 1.52 | 0.22 | 6.1E-02 |
| rs923198  | EZR      | 6   | 159166705 | T   | 392 | 0.92 | 0.14 | 5.7E-01 | T                        | 290 | 0.96 | 0.18 | 8.1E-01 | T             | 280 | 0.91 | 0.17 | 6.0E-01 |
| rs925101  | TRPV3    | 17  | 3371257   | C   | 394 | 0.94 | 0.15 | 6.6E-01 | C                        | 292 | 0.93 | 0.18 | 6.9E-01 | C             | 281 | 0.98 | 0.18 | 9.0E-01 |
| rs925453  | KLKB1    | 4   | 187416204 | T   | 394 | 0.73 | 0.16 | 5.6E-02 | T                        | 292 | 0.80 | 0.20 | 2.7E-01 | T             | 281 | 0.73 | 0.20 | 1.2E-01 |
| rs927544  | HTR2A    | 13  | 46354052  | G   | 394 | 1.00 | 0.16 | 1.0E+00 | G                        | 292 | 0.83 | 0.20 | 3.4E-01 | G             | 281 | 1.10 | 0.20 | 6.4E-01 |
| rs928197  | GAD2     | 10  | 26629631  | A   | 394 | 0.93 | 0.19 | 7.0E-01 | A                        | 292 | 0.99 | 0.23 | 9.7E-01 | A             | 281 | 0.86 | 0.24 | 5.2E-01 |
| rs9282564 | ABCB1    | 7   | 87067376  | C   | 394 | 0.80 | 0.22 | 3.2E-01 | C                        | 292 | 0.63 | 0.30 | 1.2E-01 | C             | 281 | 1.04 | 0.26 | 8.9E-01 |
| rs928765  | KCNJ6    | 21  | 38173472  | T   | 393 | 0.96 | 0.15 | 8.0E-01 | T                        | 291 | 0.96 | 0.18 | 8.3E-01 | T             | 281 | 1.04 | 0.19 | 8.4E-01 |
| rs928766  | KCNJ6    | 21  | 38191145  | G   | 393 | 1.30 | 0.18 | 1.6E-01 | G                        | 291 | 1.33 | 0.22 | 2.1E-01 | G             | 280 | 1.35 | 0.23 | 2.0E-01 |
| rs9288452 | ERBB4    | 2   | 212895796 | A   | 393 | 1.26 | 0.22 | 2.9E-01 | A                        | 292 | 1.12 | 0.27 | 6.7E-01 | A             | 281 | 1.32 | 0.27 | 2.9E-01 |
| rs9288993 | DRD3     | 3   | 115341863 | G   | 394 | 0.74 | 0.55 | 5.9E-01 | G                        | 292 | 0.67 | 0.69 | 5.6E-01 | G             | 281 | 0.75 | 0.69 | 6.8E-01 |
| rs929416  | CACNA2D1 | 7   | 81781871  | G   | 386 | 0.86 | 0.16 | 3.7E-01 | G                        | 285 | 0.82 | 0.20 | 3.3E-01 | G             | 276 | 0.95 | 0.20 | 7.9E-01 |
| rs9301140 | EFNB2    | 13  | 105950970 | C   | 394 | 1.00 | 0.21 | 1.0E+00 | C                        | 292 | 1.02 | 0.25 | 9.3E-01 | C             | 281 | 1.01 | 0.26 | 9.7E-01 |
| rs9301143 | EFNB2    | 13  | 105989083 | T   | 393 | 0.71 | 0.15 | 2.8E-02 | T                        | 291 | 0.65 | 0.19 | 2.1E-02 | T             | 281 | 0.75 | 0.19 | 1.3E-01 |
| rs930653  | PPP3R1   | 2   | 68317775  | A   | 394 | 1.11 | 0.15 | 5.0E-01 | A                        | 292 | 0.99 | 0.18 | 9.8E-01 | A             | 281 | 1.24 | 0.19 | 2.5E-01 |
| rs9316233 | HTR2A    | 13  | 46331356  | G   | 394 | 0.49 | 0.19 | 3.0E-04 | G                        | 292 | 0.56 | 0.23 | 1.3E-02 | G             | 281 | 0.42 | 0.27 | 1.0E-03 |
| rs9318    | PRKD3    | 2   | 37331418  | G   | 393 | 1.07 | 0.20 | 7.4E-01 | G                        | 291 | 0.69 | 0.27 | 1.6E-01 | G             | 281 | 1.47 | 0.23 | 1.0E-01 |
| rs9318026 | AIM      | 13  | 71204246  | T   | 394 | 0.55 | 0.23 | 1.0E-02 | T                        | 292 | 0.44 | 0.31 | 7.5E-03 | T             | 281 | 0.66 | 0.29 | 1.4E-01 |
| rs9322045 | GRM1     | 6   | 146426643 | G   | 394 | 1.01 | 0.15 | 9.4E-01 | G                        | 292 | 0.93 | 0.18 | 6.8E-01 | G             | 281 | 1.10 | 0.18 | 6.0E-01 |
| rs9322446 | OPRM1    | 6   | 154450395 | A   | 394 | 1.53 | 0.21 | 4.2E-02 | A                        | 292 | 1.38 | 0.25 | 1.9E-01 | A             | 281 | 1.80 | 0.26 | 2.4E-02 |
| rs932476  | PLA2G4A  | 1   | 185200178 | G   | 394 | 0.82 | 0.15 | 2.0E-01 | G                        | 292 | 0.82 | 0.18 | 2.6E-01 | G             | 281 | 0.79 | 0.19 | 2.0E-01 |

| SNP       | GENE    | CHR | BP        | TMD |     |      |      |         | TMD with widespread pain |     |      |      |         | Localized TMD |     |      |      |         |
|-----------|---------|-----|-----------|-----|-----|------|------|---------|--------------------------|-----|------|------|---------|---------------|-----|------|------|---------|
|           |         |     |           | A1  | N   | OR   | SE   | P       | A1                       | N   | OR   | SE   | P       | A1            | N   | OR   | SE   | P       |
| rs9324916 | NR3C1   | 5   | 142702853 | C   | 394 | 1.10 | 0.18 | 6.0E-01 | C                        | 292 | 1.16 | 0.21 | 4.7E-01 | C             | 281 | 1.00 | 0.22 | 9.9E-01 |
| rs9324918 | NR3C1   | 5   | 142747353 | C   | 393 | 0.55 | 0.20 | 2.5E-03 | C                        | 291 | 0.42 | 0.27 | 1.5E-03 | C             | 281 | 0.68 | 0.24 | 1.2E-01 |
| rs9324924 | NR3C1   | 5   | 142772677 | T   | 394 | 0.79 | 0.15 | 1.2E-01 | T                        | 292 | 0.74 | 0.18 | 9.7E-02 | T             | 281 | 0.89 | 0.19 | 5.2E-01 |
| rs9326052 | INADL   | 1   | 62129178  | G   | 392 | 0.99 | 0.15 | 9.6E-01 | G                        | 290 | 1.12 | 0.18 | 5.2E-01 | G             | 281 | 0.88 | 0.19 | 5.0E-01 |
| rs932816  | FAAH    | 1   | 46632336  | A   | 393 | 0.98 | 0.16 | 9.1E-01 | A                        | 292 | 1.08 | 0.19 | 7.1E-01 | A             | 280 | 0.84 | 0.21 | 4.2E-01 |
| rs9332242 | CYP2C9  | 10  | 96738883  | G   | 394 | 1.26 | 0.21 | 2.6E-01 | G                        | 292 | 1.17 | 0.26 | 5.5E-01 | G             | 281 | 1.43 | 0.25 | 1.5E-01 |
| rs9332381 | COMT    | 22  | 18336553  | G   | 394 | 1.59 | 0.40 | 2.5E-01 | G                        | 292 | 1.08 | 0.50 | 8.8E-01 | G             | 281 | 1.99 | 0.45 | 1.2E-01 |
| rs9340820 | ESR1    | 6   | 152217518 | G   | 392 | 0.84 | 0.61 | 7.7E-01 | G                        | 291 | 0.30 | 1.09 | 2.6E-01 | G             | 280 | 1.38 | 0.66 | 6.3E-01 |
| rs9340835 | ESR1    | 6   | 152241624 | A   | 394 | 1.24 | 0.15 | 1.5E-01 | A                        | 292 | 1.26 | 0.18 | 2.1E-01 | A             | 281 | 1.19 | 0.19 | 3.6E-01 |
| rs9340954 | ESR1    | 6   | 152361865 | G   | 394 | 0.81 | 0.16 | 2.0E-01 | G                        | 292 | 0.75 | 0.20 | 1.4E-01 | G             | 281 | 0.82 | 0.20 | 3.1E-01 |
| rs9344757 | CNR1    | 6   | 88936647  | T   | 394 | 1.11 | 0.15 | 4.9E-01 | T                        | 292 | 1.29 | 0.19 | 1.7E-01 | T             | 281 | 0.99 | 0.20 | 9.5E-01 |
| rs9347258 | EZR     | 6   | 159153031 | T   | 392 | 0.90 | 0.14 | 4.4E-01 | T                        | 290 | 0.91 | 0.18 | 6.0E-01 | T             | 279 | 0.90 | 0.18 | 5.6E-01 |
| rs934778  | POMC    | 2   | 25242728  | G   | 392 | 1.24 | 0.15 | 1.5E-01 | G                        | 290 | 1.42 | 0.18 | 4.9E-02 | G             | 281 | 1.02 | 0.19 | 9.4E-01 |
| rs935112  | CCK     | 3   | 42286496  | A   | 393 | 1.15 | 0.22 | 5.2E-01 | A                        | 291 | 1.23 | 0.26 | 4.3E-01 | A             | 280 | 1.11 | 0.28 | 6.9E-01 |
| rs935661  | PRKCE   | 2   | 45908861  | T   | 394 | 1.18 | 0.14 | 2.4E-01 | T                        | 292 | 1.11 | 0.17 | 5.4E-01 | T             | 281 | 1.26 | 0.17 | 1.8E-01 |
| rs9373486 | GRM1    | 6   | 146487717 | C   | 393 | 1.08 | 0.15 | 6.0E-01 | C                        | 291 | 0.98 | 0.18 | 9.1E-01 | C             | 280 | 1.14 | 0.18 | 4.7E-01 |
| rs9375907 | TAAR1   | 6   | 133007736 | T   | 392 | 1.20 | 0.17 | 2.8E-01 | T                        | 290 | 1.12 | 0.21 | 5.7E-01 | T             | 280 | 1.35 | 0.20 | 1.3E-01 |
| rs9386147 | GRM1    | 6   | 146558230 | T   | 394 | 1.10 | 0.16 | 5.7E-01 | T                        | 292 | 1.11 | 0.19 | 6.0E-01 | T             | 281 | 1.05 | 0.21 | 8.3E-01 |
| rs9388989 | AIM     | 6   | 132739275 | A   | 394 | 1.11 | 0.17 | 5.4E-01 | A                        | 292 | 1.25 | 0.21 | 2.9E-01 | A             | 281 | 1.05 | 0.23 | 8.3E-01 |
| rs9389004 | TAAR9   | 6   | 132901953 | A   | 394 | 0.87 | 0.38 | 7.0E-01 | A                        | 292 | 0.78 | 0.47 | 5.9E-01 | A             | 281 | 0.88 | 0.47 | 7.8E-01 |
| rs9389009 | TAAR5   | 6   | 132957624 | A   | 394 | 1.02 | 0.14 | 8.9E-01 | A                        | 292 | 0.93 | 0.17 | 6.7E-01 | A             | 281 | 1.06 | 0.18 | 7.3E-01 |
| rs9402439 | TAAR1   | 6   | 133009295 | G   | 394 | 0.87 | 0.14 | 3.5E-01 | G                        | 292 | 1.07 | 0.17 | 6.9E-01 | G             | 281 | 0.66 | 0.19 | 2.8E-02 |
| rs9403765 | GRM1    | 6   | 146409734 | G   | 393 | 1.01 | 0.15 | 9.3E-01 | G                        | 291 | 0.93 | 0.18 | 6.9E-01 | G             | 280 | 1.11 | 0.18 | 5.9E-01 |
| rs9403775 | GRM1    | 6   | 146728202 | T   | 394 | 1.10 | 0.22 | 6.6E-01 | T                        | 292 | 0.81 | 0.28 | 4.6E-01 | T             | 281 | 1.46 | 0.26 | 1.4E-01 |
| rs9414806 | PRKG1   | 10  | 52506162  | T   | 394 | 1.07 | 0.17 | 6.7E-01 | T                        | 292 | 1.16 | 0.21 | 4.7E-01 | T             | 281 | 1.03 | 0.22 | 9.0E-01 |
| rs9415743 | PRKG1   | 10  | 52589115  | C   | 394 | 1.18 | 0.41 | 6.9E-01 | C                        | 292 | 1.89 | 0.47 | 1.7E-01 | C             | 281 | 0.80 | 0.61 | 7.1E-01 |
| rs9424339 | CNR2    | 1   | 24110549  | A   | 394 | 1.28 | 0.18 | 1.8E-01 | A                        | 292 | 1.18 | 0.23 | 4.9E-01 | A             | 281 | 1.33 | 0.21 | 1.8E-01 |
| rs9438876 | RUNX3   | 1   | 25113703  | A   | 383 | 1.03 | 0.15 | 8.7E-01 | A                        | 283 | 0.85 | 0.18 | 3.7E-01 | A             | 272 | 1.20 | 0.19 | 3.4E-01 |
| rs944461  | ESR2    | 14  | 63774893  | C   | 393 | 0.91 | 0.41 | 8.3E-01 | C                        | 291 | 1.55 | 0.45 | 3.3E-01 | C             | 280 | 0.32 | 0.77 | 1.4E-01 |
| rs945039  | BDKRB2  | 14  | 95753951  | A   | 392 | 1.00 | 0.17 | 1.0E+00 | A                        | 290 | 1.21 | 0.20 | 3.3E-01 | A             | 279 | 0.85 | 0.22 | 4.7E-01 |
| rs946188  | ADRA1D  | 20  | 4163316   | G   | 394 | 0.80 | 0.16 | 1.7E-01 | G                        | 292 | 0.63 | 0.21 | 2.8E-02 | G             | 281 | 0.98 | 0.20 | 9.0E-01 |
| rs9463087 | RUNX2   | 6   | 45509676  | A   | 394 | 1.46 | 0.31 | 2.2E-01 | A                        | 292 | 0.95 | 0.43 | 9.1E-01 | A             | 281 | 2.29 | 0.36 | 2.0E-02 |
| rs946478  | NTSR1   | 20  | 60817437  | G   | 391 | 0.99 | 0.17 | 9.6E-01 | G                        | 289 | 0.81 | 0.22 | 3.3E-01 | G             | 280 | 1.20 | 0.21 | 3.8E-01 |
| rs949493  | STAU2   | 8   | 74690550  | C   | 394 | 1.48 | 0.28 | 1.7E-01 | C                        | 292 | 1.37 | 0.35 | 3.7E-01 | C             | 281 | 1.75 | 0.34 | 9.7E-02 |
| rs951012  | PRKCE   | 2   | 46251135  | A   | 394 | 1.05 | 0.15 | 7.6E-01 | A                        | 292 | 0.87 | 0.20 | 4.8E-01 | A             | 281 | 1.30 | 0.19 | 1.6E-01 |
| rs9520087 | EFNB2   | 13  | 105942321 | A   | 384 | 0.94 | 0.15 | 6.6E-01 | A                        | 284 | 0.95 | 0.18 | 7.8E-01 | A             | 273 | 0.90 | 0.19 | 5.7E-01 |
| rs9532    | PPP1R1B | 17  | 35046139  | A   | 394 | 1.78 | 0.64 | 3.7E-01 | A                        | 292 | 1.83 | 0.83 | 4.6E-01 | A             | 281 | 2.77 | 0.77 | 1.9E-01 |
| rs957717  | PRKG1   | 10  | 52464130  | T   | 394 | 0.79 | 0.15 | 1.1E-01 | T                        | 292 | 0.84 | 0.18 | 3.4E-01 | T             | 281 | 0.75 | 0.19 | 1.2E-01 |
| rs957828  | PRKACB  | 1   | 84314304  | C   | 392 | 0.80 | 0.16 | 1.6E-01 | C                        | 291 | 0.68 | 0.20 | 5.8E-02 | C             | 280 | 1.00 | 0.20 | 9.9E-01 |

| SNP       | GENE    | CHR | BP        | TMD |     |      |      |         | TMD with widespread pain |     |      |      |         | Localized TMD |     |      |      |         |
|-----------|---------|-----|-----------|-----|-----|------|------|---------|--------------------------|-----|------|------|---------|---------------|-----|------|------|---------|
|           |         |     |           | A1  | N   | OR   | SE   | P       | A1                       | N   | OR   | SE   | P       | A1            | N   | OR   | SE   | P       |
| rs959     | PTGER3  | 1   | 71090849  | C   | 393 | 0.88 | 0.18 | 4.6E-01 | C                        | 291 | 0.88 | 0.21 | 5.6E-01 | C             | 280 | 0.87 | 0.22 | 5.3E-01 |
| rs960452  | CAMK4   | 5   | 110723657 | G   | 394 | 1.04 | 0.15 | 7.7E-01 | G                        | 292 | 1.35 | 0.18 | 8.8E-02 | G             | 281 | 0.82 | 0.19 | 3.1E-01 |
| rs9608416 | ADRBK2  | 22  | 24441018  | G   | 394 | 0.76 | 0.14 | 5.3E-02 | G                        | 292 | 0.64 | 0.18 | 1.5E-02 | G             | 281 | 0.95 | 0.18 | 8.0E-01 |
| rs9610338 | MAPK1   | 22  | 20481821  | A   | 394 | 1.13 | 0.14 | 3.7E-01 | A                        | 292 | 0.96 | 0.17 | 8.3E-01 | A             | 281 | 1.33 | 0.17 | 9.9E-02 |
| rs9610496 | MAPK1   | 22  | 20549449  | T   | 394 | 0.94 | 0.17 | 7.4E-01 | T                        | 292 | 0.97 | 0.20 | 8.9E-01 | T             | 281 | 0.91 | 0.22 | 6.6E-01 |
| rs9624896 | ADRBK2  | 22  | 24503184  | T   | 394 | 0.96 | 0.15 | 7.7E-01 | T                        | 292 | 1.08 | 0.18 | 6.7E-01 | T             | 281 | 0.87 | 0.19 | 4.7E-01 |
| rs963065  | PPP3CA  | 4   | 102284654 | T   | 394 | 1.10 | 0.14 | 5.2E-01 | T                        | 292 | 1.07 | 0.18 | 6.9E-01 | T             | 281 | 1.14 | 0.18 | 4.8E-01 |
| rs9639168 | ETV1    | 7   | 13945334  | C   | 394 | 1.32 | 0.15 | 5.9E-02 | C                        | 292 | 1.62 | 0.18 | 6.4E-03 | C             | 281 | 1.16 | 0.19 | 4.4E-01 |
| rs9639213 | AIM     | 7   | 14707372  | A   | 394 | 1.04 | 0.15 | 7.7E-01 | A                        | 292 | 1.18 | 0.18 | 3.5E-01 | A             | 281 | 0.91 | 0.19 | 6.2E-01 |
| rs9646720 | TRPM8   | 2   | 234512312 | G   | 393 | 0.88 | 0.18 | 4.5E-01 | G                        | 291 | 0.73 | 0.22 | 1.6E-01 | G             | 281 | 1.06 | 0.22 | 7.8E-01 |
| rs9646771 | SCN9A   | 2   | 166871289 | T   | 394 | 0.95 | 0.15 | 7.6E-01 | T                        | 292 | 0.95 | 0.18 | 7.6E-01 | T             | 281 | 0.91 | 0.19 | 6.3E-01 |
| rs9646772 | SCN9A   | 2   | 166871445 | A   | 394 | 0.97 | 0.15 | 8.2E-01 | A                        | 292 | 0.97 | 0.18 | 8.5E-01 | A             | 281 | 0.91 | 0.19 | 6.3E-01 |
| rs9651118 | MTHFR   | 1   | 11784801  | C   | 393 | 1.09 | 0.17 | 6.3E-01 | C                        | 291 | 1.03 | 0.21 | 8.7E-01 | C             | 280 | 1.24 | 0.21 | 3.1E-01 |
| rs9658255 | NOS1    | 12  | 116284139 | C   | 393 | 0.92 | 0.14 | 5.5E-01 | C                        | 292 | 0.76 | 0.18 | 1.1E-01 | C             | 280 | 1.06 | 0.18 | 7.4E-01 |
| rs9658354 | NOS1    | 12  | 116208608 | T   | 394 | 1.11 | 0.14 | 4.4E-01 | T                        | 292 | 1.16 | 0.17 | 3.7E-01 | T             | 281 | 1.08 | 0.18 | 6.5E-01 |
| rs9658501 | NOS1    | 12  | 116149647 | G   | 394 | 1.52 | 0.65 | 5.2E-01 | G                        | 292 | 1.84 | 0.72 | 4.0E-01 | G             | 281 | 1.01 | 0.88 | 9.9E-01 |
| rs966824  | HIF1A   | 14  | 61270271  | T   | 394 | 0.89 | 0.33 | 7.4E-01 | T                        | 292 | 0.61 | 0.46 | 2.7E-01 | T             | 281 | 1.24 | 0.39 | 5.7E-01 |
| rs969     | ZFAND5  | 9   | 74159684  | C   | 394 | 1.13 | 0.14 | 4.0E-01 | C                        | 292 | 1.27 | 0.17 | 1.7E-01 | C             | 281 | 1.02 | 0.18 | 9.2E-01 |
| rs9694958 | IKBKB   | 8   | 42275203  | G   | 393 | 0.87 | 0.27 | 6.0E-01 | G                        | 292 | 0.79 | 0.34 | 4.9E-01 | G             | 280 | 0.85 | 0.34 | 6.3E-01 |
| rs971000  | FMR1    | 23  | 146809485 | G   | 394 | 1.09 | 0.15 | 5.6E-01 | G                        | 292 | 1.14 | 0.18 | 4.6E-01 | G             | 281 | 1.01 | 0.18 | 9.7E-01 |
| rs971249  | ACE2    | 23  | 15517571  | T   | 393 | 1.01 | 0.15 | 9.2E-01 | T                        | 291 | 1.21 | 0.18 | 2.8E-01 | T             | 280 | 0.76 | 0.20 | 1.7E-01 |
| rs971930  | SLC6A11 | 3   | 10847262  | G   | 394 | 0.64 | 0.15 | 2.7E-03 | G                        | 292 | 0.71 | 0.17 | 4.4E-02 | G             | 281 | 0.57 | 0.19 | 3.0E-03 |
| rs9722    | S100B   | 21  | 46843667  | A   | 394 | 1.44 | 0.24 | 1.3E-01 | A                        | 292 | 1.27 | 0.30 | 4.2E-01 | A             | 281 | 1.68 | 0.29 | 7.1E-02 |
| rs972488  | ERBB4   | 2   | 213025157 | T   | 394 | 1.04 | 0.20 | 8.4E-01 | T                        | 292 | 1.14 | 0.24 | 6.0E-01 | T             | 281 | 1.11 | 0.26 | 6.9E-01 |
| rs973002  | CRHR2   | 7   | 30665429  | G   | 392 | 0.99 | 0.19 | 9.5E-01 | G                        | 290 | 0.88 | 0.25 | 6.0E-01 | G             | 279 | 1.18 | 0.23 | 4.8E-01 |
| rs9764    | NPY1R   | 4   | 164464855 | C   | 394 | 1.16 | 0.16 | 3.7E-01 | C                        | 292 | 1.18 | 0.20 | 4.1E-01 | C             | 281 | 1.24 | 0.21 | 3.0E-01 |
| rs977003  | HTR2A   | 13  | 46313002  | C   | 394 | 0.98 | 0.15 | 8.8E-01 | C                        | 292 | 1.16 | 0.18 | 4.2E-01 | C             | 281 | 0.78 | 0.19 | 1.9E-01 |
| rs977516  | GRIA4   | 11  | 105066764 | C   | 393 | 0.97 | 0.14 | 8.2E-01 | C                        | 291 | 1.06 | 0.18 | 7.3E-01 | C             | 281 | 0.92 | 0.18 | 6.2E-01 |
| rs9782928 | KCNA2   | 1   | 110943205 | T   | 394 | 1.00 | 0.14 | 1.0E+00 | T                        | 292 | 0.98 | 0.18 | 9.0E-01 | T             | 281 | 0.97 | 0.18 | 8.8E-01 |
| rs9785000 | ETV1    | 7   | 13897707  | G   | 394 | 0.91 | 0.17 | 6.0E-01 | G                        | 292 | 0.85 | 0.21 | 4.4E-01 | G             | 281 | 0.94 | 0.22 | 7.7E-01 |
| rs9785023 | NPY     | 7   | 24291534  | G   | 394 | 0.82 | 0.15 | 1.7E-01 | G                        | 292 | 0.85 | 0.18 | 3.5E-01 | G             | 281 | 0.79 | 0.19 | 2.1E-01 |
| rs9785086 | PPP3CC  | 8   | 22357907  | T   | 387 | 1.09 | 0.30 | 7.8E-01 | T                        | 288 | 1.14 | 0.35 | 7.2E-01 | T             | 274 | 1.02 | 0.38 | 9.5E-01 |
| rs9785118 | IKBKB   | 8   | 42305648  | G   | 394 | 0.82 | 0.44 | 6.6E-01 | G                        | 292 | 0.48 | 0.66 | 2.7E-01 | G             | 281 | 1.31 | 0.50 | 5.9E-01 |
| rs979924  | PLA2G4A | 1   | 185064102 | C   | 394 | 0.85 | 0.22 | 4.5E-01 | C                        | 292 | 0.69 | 0.29 | 1.9E-01 | C             | 281 | 1.01 | 0.27 | 9.6E-01 |
| rs9806373 | CHRM5   | 15  | 32095249  | T   | 394 | 0.97 | 0.25 | 9.0E-01 | T                        | 292 | 1.17 | 0.28 | 5.7E-01 | T             | 281 | 0.72 | 0.33 | 3.2E-01 |
| rs9811353 | ATP6V1A | 3   | 114966669 | A   | 394 | 1.17 | 0.15 | 3.2E-01 | A                        | 292 | 1.30 | 0.19 | 1.6E-01 | A             | 281 | 1.14 | 0.19 | 5.1E-01 |
| rs981288  | KCNJ6   | 21  | 38142419  | T   | 394 | 1.11 | 0.26 | 6.9E-01 | T                        | 292 | 1.03 | 0.32 | 9.3E-01 | T             | 281 | 1.26 | 0.33 | 4.8E-01 |
| rs9815891 | SCN10A  | 3   | 38808001  | T   | 394 | 1.19 | 0.15 | 2.4E-01 | T                        | 292 | 1.05 | 0.18 | 8.1E-01 | T             | 281 | 1.34 | 0.19 | 1.2E-01 |
| rs981778  | GABRB3  | 15  | 24508333  | A   | 394 | 0.90 | 0.14 | 4.7E-01 | A                        | 292 | 0.78 | 0.18 | 1.8E-01 | A             | 281 | 1.01 | 0.18 | 9.7E-01 |

| SNP        | GENE    | CHR | BP        | TMD |     |      |      |         | TMD with widespread pain |     |      |      |         | Localized TMD |     |      |      |         |
|------------|---------|-----|-----------|-----|-----|------|------|---------|--------------------------|-----|------|------|---------|---------------|-----|------|------|---------|
|            |         |     |           | A1  | N   | OR   | SE   | P       | A1                       | N   | OR   | SE   | P       | A1            | N   | OR   | SE   | P       |
| rs9824856  | DRD3    | 3   | 115335421 | C   | 394 | 0.66 | 0.54 | 4.3E-01 | C                        | 292 | 0.67 | 0.69 | 5.6E-01 | C             | 281 | 0.75 | 0.69 | 6.8E-01 |
| rs9825563  | DRD3    | 3   | 115382910 | G   | 394 | 1.08 | 0.15 | 6.1E-01 | G                        | 292 | 1.29 | 0.17 | 1.5E-01 | G             | 281 | 0.94 | 0.20 | 7.5E-01 |
| rs9827941  | SCN10A  | 3   | 38811463  | A   | 394 | 0.76 | 0.14 | 5.3E-02 | A                        | 292 | 0.80 | 0.17 | 1.8E-01 | A             | 281 | 0.71 | 0.18 | 5.3E-02 |
| rs9830725  | MME     | 3   | 156351240 | G   | 393 | 1.03 | 0.15 | 8.6E-01 | G                        | 291 | 0.98 | 0.18 | 9.1E-01 | G             | 280 | 1.07 | 0.19 | 7.2E-01 |
| rs9835618  | SLC6A11 | 3   | 10839445  | G   | 394 | 0.67 | 0.18 | 3.1E-02 | G                        | 292 | 0.72 | 0.22 | 1.4E-01 | G             | 281 | 0.60 | 0.24 | 3.3E-02 |
| rs9841857  | NFKBIZ  | 3   | 103032712 | T   | 394 | 0.86 | 0.17 | 3.8E-01 | T                        | 292 | 0.80 | 0.21 | 2.9E-01 | T             | 281 | 0.95 | 0.22 | 8.2E-01 |
| rs9862375  | EPHB3   | 3   | 185773042 | A   | 392 | 1.33 | 0.27 | 3.0E-01 | A                        | 290 | 1.12 | 0.34 | 7.4E-01 | A             | 279 | 1.54 | 0.32 | 1.8E-01 |
| rs9862876  | CX3CR1  | 3   | 39286587  | G   | 394 | 1.06 | 0.16 | 7.4E-01 | G                        | 292 | 0.84 | 0.21 | 4.1E-01 | G             | 281 | 1.36 | 0.20 | 1.3E-01 |
| rs9864287  | MME     | 3   | 156367900 | T   | 376 | 1.05 | 0.15 | 7.6E-01 | T                        | 281 | 0.93 | 0.19 | 7.1E-01 | T             | 269 | 1.20 | 0.20 | 3.5E-01 |
| rs9877389  | P2RY12  | 3   | 152534805 | A   | 394 | 1.32 | 0.19 | 1.5E-01 | A                        | 292 | 1.06 | 0.26 | 8.1E-01 | A             | 281 | 1.66 | 0.23 | 3.0E-02 |
| rs989692   | MME     | 3   | 156284059 | T   | 393 | 1.06 | 0.15 | 7.1E-01 | T                        | 291 | 1.06 | 0.18 | 7.5E-01 | T             | 280 | 0.94 | 0.18 | 7.6E-01 |
| rs9905578  | ARRB2   | 17  | 4556389   | T   | 394 | 1.00 | 0.32 | 1.0E+00 | T                        | 292 | 0.82 | 0.39 | 6.1E-01 | T             | 281 | 1.11 | 0.37 | 7.8E-01 |
| rs991738   | GLRA1   | 5   | 151278642 | A   | 394 | 1.00 | 0.14 | 1.0E+00 | A                        | 292 | 1.06 | 0.17 | 7.4E-01 | A             | 281 | 0.95 | 0.18 | 7.6E-01 |
| rs9918696  | CAMK2B  | 7   | 44328435  | G   | 394 | 1.26 | 0.14 | 1.0E-01 | G                        | 292 | 1.28 | 0.18 | 1.6E-01 | G             | 281 | 1.27 | 0.18 | 1.8E-01 |
| rs991985   | KCNJ6   | 21  | 38128024  | A   | 393 | 0.99 | 0.15 | 9.2E-01 | A                        | 292 | 1.08 | 0.17 | 6.5E-01 | A             | 280 | 0.92 | 0.19 | 6.5E-01 |
| rs9926131  | ADCY7   | 16  | 48905910  | A   | 391 | 0.79 | 0.15 | 1.2E-01 | A                        | 290 | 0.83 | 0.18 | 2.9E-01 | A             | 278 | 0.76 | 0.19 | 1.6E-01 |
| rs9936021  | ADCY7   | 16  | 48883714  | G   | 393 | 1.16 | 0.17 | 3.8E-01 | G                        | 291 | 1.15 | 0.20 | 4.8E-01 | G             | 280 | 1.12 | 0.22 | 5.9E-01 |
| rs9937837  | ITGAM   | 16  | 31206440  | G   | 394 | 0.99 | 0.16 | 9.4E-01 | G                        | 292 | 0.85 | 0.19 | 4.0E-01 | G             | 281 | 1.08 | 0.20 | 6.9E-01 |
| rs9939322  | ADCY7   | 16  | 48885337  | A   | 393 | 0.96 | 0.19 | 8.3E-01 | A                        | 291 | 0.92 | 0.23 | 7.1E-01 | A             | 280 | 1.01 | 0.23 | 9.8E-01 |
| rs9941944  | ADRBK2  | 22  | 24378926  | C   | 394 | 0.88 | 0.26 | 6.1E-01 | C                        | 292 | 0.62 | 0.35 | 1.7E-01 | C             | 281 | 1.07 | 0.30 | 8.1E-01 |
| rs9953038  | MC4R    | 18  | 56195643  | C   | 394 | 0.43 | 0.61 | 1.7E-01 | C                        | 292 | 0.39 | 0.79 | 2.3E-01 | C             | 281 | 0.44 | 0.79 | 3.0E-01 |
| rs9961622  | GALR1   | 18  | 73102328  | C   | 392 | 0.82 | 0.44 | 6.4E-01 | C                        | 290 | 0.89 | 0.52 | 8.2E-01 | C             | 279 | 0.65 | 0.59 | 4.7E-01 |
| rs9966412  | MC4R    | 18  | 56184915  | T   | 394 | 1.18 | 0.22 | 4.5E-01 | T                        | 292 | 1.20 | 0.26 | 4.9E-01 | T             | 281 | 1.09 | 0.27 | 7.5E-01 |
| rs9973445  | CXCR4   | 2   | 136595086 | C   | 394 | 0.88 | 0.23 | 5.6E-01 | C                        | 292 | 1.09 | 0.27 | 7.5E-01 | C             | 281 | 0.66 | 0.32 | 1.9E-01 |
| rs997926   | PPP3CA  | 4   | 102178167 | G   | 394 | 0.99 | 0.16 | 9.4E-01 | G                        | 292 | 1.06 | 0.19 | 7.6E-01 | G             | 281 | 0.94 | 0.20 | 7.4E-01 |
| rs998259   | GCH1    | 14  | 54424781  | T   | 394 | 0.99 | 0.17 | 9.3E-01 | T                        | 292 | 0.98 | 0.20 | 9.4E-01 | T             | 281 | 0.96 | 0.21 | 8.3E-01 |
| rs9989002  | IGF1    | 12  | 101374353 | A   | 394 | 0.83 | 0.16 | 2.4E-01 | A                        | 292 | 0.87 | 0.19 | 4.7E-01 | A             | 281 | 0.81 | 0.20 | 2.8E-01 |
| rs9990860  | NPY2R   | 4   | 156359515 | G   | 394 | 0.94 | 0.17 | 7.3E-01 | G                        | 292 | 0.89 | 0.20 | 5.8E-01 | G             | 281 | 0.99 | 0.21 | 9.5E-01 |
| rs9997745  | ACSL1   | 4   | 185974837 | A   | 393 | 0.61 | 0.21 | 2.1E-02 | A                        | 292 | 0.57 | 0.27 | 3.7E-02 | A             | 280 | 0.69 | 0.27 | 1.6E-01 |
| rs10087172 | CHRNA6  | 8   | 42736025  | C   | 391 | 0.93 | 0.20 | 7.2E-01 | C                        | 290 | 0.77 | 0.25 | 3.0E-01 | C             | 279 | 1.07 | 0.25 | 8.0E-01 |
| rs1072003  | CHRNA6  | 8   | 42739158  | G   | 387 | 1.07 | 0.20 | 7.3E-01 | G                        | 287 | 0.90 | 0.25 | 6.7E-01 | G             | 276 | 1.19 | 0.25 | 5.0E-01 |
| rs11047919 | KRAS    | 12  | 25290388  | A   | 386 | 0.90 | 0.15 | 4.5E-01 | A                        | 287 | 1.02 | 0.18 | 9.2E-01 | A             | 276 | 0.78 | 0.19 | 1.9E-01 |
| rs1137188  | KRAS    | 12  | 25250619  | G   | 385 | 0.94 | 0.15 | 6.5E-01 | G                        | 286 | 1.09 | 0.18 | 6.2E-01 | G             | 275 | 0.83 | 0.19 | 3.1E-01 |
| rs1137282  | KRAS    | 12  | 25254044  | G   | 388 | 0.68 | 0.18 | 2.9E-02 | G                        | 289 | 0.80 | 0.21 | 3.0E-01 | G             | 276 | 0.60 | 0.23 | 2.9E-02 |
| rs12424283 | KRAS    | 12  | 25269293  | G   | 385 | 0.92 | 0.15 | 5.9E-01 | G                        | 286 | 1.06 | 0.18 | 7.4E-01 | G             | 276 | 0.84 | 0.19 | 3.4E-01 |
| rs208294   | P2RX7   | 12  | 120084636 | T   | 384 | 1.08 | 0.15 | 6.1E-01 | T                        | 285 | 0.94 | 0.18 | 7.5E-01 | T             | 274 | 1.18 | 0.19 | 3.9E-01 |
| rs2196128  | CHRNA6  | 8   | 42737443  | C   | 382 | 0.88 | 0.19 | 5.0E-01 | C                        | 283 | 0.75 | 0.23 | 2.3E-01 | C             | 273 | 1.01 | 0.23 | 9.8E-01 |
| rs2304297  | CHRNA6  | 8   | 42727356  | C   | 385 | 0.97 | 0.19 | 8.8E-01 | C                        | 285 | 0.85 | 0.23 | 4.8E-01 | C             | 275 | 1.09 | 0.23 | 7.0E-01 |
| rs2955407  | KRAS    | 12  | 25299354  | C   | 384 | 0.86 | 0.15 | 3.2E-01 | C                        | 283 | 0.94 | 0.19 | 7.4E-01 | C             | 276 | 0.75 | 0.19 | 1.3E-01 |

| SNP       | GENE   | CHR | BP        | TMD |     |      |      |         | TMD with widespread pain |     |      |      |         | Localized TMD |     |      |      |         |
|-----------|--------|-----|-----------|-----|-----|------|------|---------|--------------------------|-----|------|------|---------|---------------|-----|------|------|---------|
|           |        |     |           | A1  | N   | OR   | SE   | P       | A1                       | N   | OR   | SE   | P       | A1            | N   | OR   | SE   | P       |
| rs7133640 | KRAS   | 12  | 25279583  | G   | 387 | 0.67 | 0.18 | 2.6E-02 | G                        | 288 | 0.82 | 0.21 | 3.6E-01 | G             | 276 | 0.57 | 0.24 | 1.6E-02 |
| rs7309670 | KRAS   | 12  | 25290240  | A   | 384 | 0.73 | 0.16 | 5.6E-02 | A                        | 285 | 0.93 | 0.19 | 7.0E-01 | A             | 275 | 0.59 | 0.22 | 1.7E-02 |
| rs7312175 | KRAS   | 12  | 25295871  | A   | 385 | 0.98 | 0.21 | 9.4E-01 | A                        | 285 | 0.91 | 0.27 | 7.3E-01 | A             | 275 | 0.99 | 0.26 | 9.7E-01 |
| rs7828365 | CHRNA6 | 8   | 42748471  | T   | 386 | 1.39 | 0.24 | 1.6E-01 | T                        | 286 | 1.25 | 0.28 | 4.4E-01 | T             | 275 | 1.40 | 0.28 | 2.3E-01 |
| rs7960917 | KRAS   | 12  | 25252913  | G   | 387 | 0.66 | 0.18 | 2.0E-02 | G                        | 288 | 0.79 | 0.22 | 2.6E-01 | G             | 276 | 0.57 | 0.24 | 1.8E-02 |
| rs892413  | CHRNA6 | 8   | 42733535  | A   | 385 | 0.92 | 0.20 | 6.9E-01 | A                        | 285 | 0.76 | 0.26 | 2.7E-01 | A             | 276 | 1.07 | 0.25 | 8.0E-01 |
| rs9266    | KRAS   | 12  | 25253484  | A   | 387 | 0.95 | 0.15 | 7.0E-01 | A                        | 288 | 1.08 | 0.18 | 6.5E-01 | A             | 277 | 0.86 | 0.19 | 4.0E-01 |
| rs9479757 | OPRM1  | 6   | 154453037 | A   | 386 | 1.20 | 0.26 | 4.7E-01 | A                        | 286 | 1.14 | 0.30 | 6.6E-01 | A             | 274 | 1.15 | 0.31 | 6.6E-01 |
